# Supplementary material for: Ultra-streamlined single cell proteomics by all-in-one chip and data-independent-acquisition mass spectrometry
Source: Research Square preprint supplement (doi:10.21203/rs.3.rs-138178/v2), 2021-03-22
Supplement: Supplementary file 1 [file 515c2a0ef841edb702fb1170.xlsx]

## Sheet: 13 cells_DDA
Protein IDs	Majority protein IDs	LFQ intensity PC9-MF-10-DDA-01	LFQ intensity PC9-MF-10-DDA-02	LFQ intensity PC9-MF-10-DDA-03
sp|A6NEC2|PSAL_HUMAN;sp|P55786|PSA_HUMAN	sp|A6NEC2|PSAL_HUMAN;sp|P55786|PSA_HUMAN	780160	634820	599420
sp|A6NHL2|TBAL3_HUMAN	sp|A6NHL2|TBAL3_HUMAN	0	0	564690
sp|A8MPP1|D11L8_HUMAN;sp|Q92771|DDX12_HUMAN;sp|Q96FC9|DDX11_HUMAN	sp|A8MPP1|D11L8_HUMAN;sp|Q92771|DDX12_HUMAN;sp|Q96FC9|DDX11_HUMAN	2687500	3765800	2734600
sp|Q99613|EIF3C_HUMAN;sp|B5ME19|EIFCL_HUMAN	sp|Q99613|EIF3C_HUMAN;sp|B5ME19|EIFCL_HUMAN	758840	661270	871120
sp|Q13765|NACA_HUMAN;sp|E9PAV3|NACAM_HUMAN;sp|Q9BZK3|NACP1_HUMAN	sp|Q13765|NACA_HUMAN;sp|E9PAV3|NACAM_HUMAN	14238000	14438000	11091000
sp|O00116|ADAS_HUMAN	sp|O00116|ADAS_HUMAN	0	395830	652260
sp|O00148|DX39A_HUMAN	sp|O00148|DX39A_HUMAN	538480	0	0
sp|O00151|PDLI1_HUMAN	sp|O00151|PDLI1_HUMAN	1943300	1979000	1461400
sp|O00154|BACH_HUMAN	sp|O00154|BACH_HUMAN	489120	707570	583340
sp|O00170|AIP_HUMAN	sp|O00170|AIP_HUMAN	310360	303020	314190
sp|O00231|PSD11_HUMAN	sp|O00231|PSD11_HUMAN	2089800	3882600	3616700
sp|O00232|PSD12_HUMAN	sp|O00232|PSD12_HUMAN	0	1514100	1487900
sp|O00244|ATOX1_HUMAN	sp|O00244|ATOX1_HUMAN	1069000	1090400	906080
sp|O00264|PGRC1_HUMAN	sp|O00264|PGRC1_HUMAN	589630	436060	394060
sp|O00299|CLIC1_HUMAN	sp|O00299|CLIC1_HUMAN	20776000	18184000	16369000
sp|O00303|EIF3F_HUMAN	sp|O00303|EIF3F_HUMAN	1681500	1830300	1644300
sp|O00410|IPO5_HUMAN;sp|O60518|RNBP6_HUMAN	sp|O00410|IPO5_HUMAN	703750	1186500	1080800
sp|Q9NZI8|IF2B1_HUMAN;sp|O00425|IF2B3_HUMAN;sp|Q9Y6M1|IF2B2_HUMAN	sp|Q9NZI8|IF2B1_HUMAN;sp|O00425|IF2B3_HUMAN;sp|Q9Y6M1|IF2B2_HUMAN	0	913170	950830
sp|O00429|DNM1L_HUMAN	sp|O00429|DNM1L_HUMAN	1533600	1482100	1594800
sp|O00487|PSDE_HUMAN	sp|O00487|PSDE_HUMAN	931570	895030	918920
sp|Q9P289|STK26_HUMAN;sp|O00506|STK25_HUMAN;sp|Q9Y6E0|STK24_HUMAN	sp|Q9P289|STK26_HUMAN;sp|O00506|STK25_HUMAN;sp|Q9Y6E0|STK24_HUMAN	572170	742130	482710
sp|O00567|NOP56_HUMAN	sp|O00567|NOP56_HUMAN	672150	0	0
sp|O00571|DDX3X_HUMAN;sp|O15523|DDX3Y_HUMAN;sp|Q9NQI0|DDX4_HUMAN	sp|O00571|DDX3X_HUMAN;sp|O15523|DDX3Y_HUMAN	5785700	5517000	5757900
sp|O00592|PODXL_HUMAN	sp|O00592|PODXL_HUMAN	1907900	2122700	1365400
sp|O00625|PIR_HUMAN	sp|O00625|PIR_HUMAN	443340	0	471880
sp|O00629|IMA3_HUMAN	sp|O00629|IMA3_HUMAN	0	902460	0
sp|O14493|CLD4_HUMAN;sp|O95484|CLD9_HUMAN;sp|P56747|CLD6_HUMAN;sp|O15551|CLD3_HUMAN	sp|O14493|CLD4_HUMAN;sp|O95484|CLD9_HUMAN;sp|P56747|CLD6_HUMAN;sp|O15551|CLD3_HUMAN	0	0	0
sp|O14579|COPE_HUMAN	sp|O14579|COPE_HUMAN	0	810020	882920
sp|P47813|IF1AX_HUMAN;sp|O14602|IF1AY_HUMAN	sp|P47813|IF1AX_HUMAN;sp|O14602|IF1AY_HUMAN	1049300	1261600	995120
sp|O14684|PTGES_HUMAN	sp|O14684|PTGES_HUMAN	1662600	1434200	900080
sp|O14737|PDCD5_HUMAN	sp|O14737|PDCD5_HUMAN	1103300	976750	1122400
sp|O14745|NHRF1_HUMAN	sp|O14745|NHRF1_HUMAN	0	0	235280
sp|O14818|PSA7_HUMAN;sp|Q8TAA3|PSA7L_HUMAN	sp|O14818|PSA7_HUMAN	4052600	4565200	5347500
sp|O14907|TX1B3_HUMAN	sp|O14907|TX1B3_HUMAN	1005600	1041800	989340
sp|O14908|GIPC1_HUMAN	sp|O14908|GIPC1_HUMAN	0	0	0
sp|O14929|HAT1_HUMAN	sp|O14929|HAT1_HUMAN	0	1060700	1169300
sp|P19105|ML12A_HUMAN;sp|O14950|ML12B_HUMAN;sp|P24844|MYL9_HUMAN	sp|P19105|ML12A_HUMAN;sp|O14950|ML12B_HUMAN;sp|P24844|MYL9_HUMAN	12475000	14580000	13894000
sp|O14979|HNRDL_HUMAN	sp|O14979|HNRDL_HUMAN	3552200	3045300	3074000
sp|O14980|XPO1_HUMAN	sp|O14980|XPO1_HUMAN	1204700	1017600	1094600
sp|O15143|ARC1B_HUMAN	sp|O15143|ARC1B_HUMAN	1344500	1531200	1701000
sp|O15144|ARPC2_HUMAN	sp|O15144|ARPC2_HUMAN	3759800	3267800	2594400
sp|O15173|PGRC2_HUMAN	sp|O15173|PGRC2_HUMAN	0	519650	512570
sp|O15212|PFD6_HUMAN	sp|O15212|PFD6_HUMAN	834600	1091200	806490
sp|O15347|HMGB3_HUMAN	sp|O15347|HMGB3_HUMAN	2133600	1376600	1726400
sp|O15355|PPM1G_HUMAN	sp|O15355|PPM1G_HUMAN	474510	747520	582120
sp|O15371|EIF3D_HUMAN	sp|O15371|EIF3D_HUMAN	1315200	1458500	1393900
sp|O15511|ARPC5_HUMAN	sp|O15511|ARPC5_HUMAN	1365500	1465500	1495400
sp|O43143|DHX15_HUMAN	sp|O43143|DHX15_HUMAN	2675600	2349700	2349100
sp|O43175|SERA_HUMAN	sp|O43175|SERA_HUMAN	7164000	4994800	4282300
sp|O43237|DC1L2_HUMAN	sp|O43237|DC1L2_HUMAN	0	0	151910
sp|O43242|PSMD3_HUMAN	sp|O43242|PSMD3_HUMAN	4422800	3972300	3423600
sp|O43390|HNRPR_HUMAN	sp|O43390|HNRPR_HUMAN	1750800	2138200	1529500
sp|O43396|TXNL1_HUMAN	sp|O43396|TXNL1_HUMAN	0	523160	0
sp|O43399|TPD54_HUMAN	sp|O43399|TPD54_HUMAN	6795000	6422700	5376100
sp|O43488|ARK72_HUMAN	sp|O43488|ARK72_HUMAN	300000	0	0
sp|O43491|E41L2_HUMAN	sp|O43491|E41L2_HUMAN	337950	543400	313870
sp|O43670|ZN207_HUMAN	sp|O43670|ZN207_HUMAN	965970	676650	883900
sp|O43684|BUB3_HUMAN	sp|O43684|BUB3_HUMAN	926080	0	714720
sp|O43707|ACTN4_HUMAN;sp|Q9H254|SPTN4_HUMAN	sp|O43707|ACTN4_HUMAN	56049000	66864000	68225000
sp|O43760|SNG2_HUMAN	sp|O43760|SNG2_HUMAN	854730	0	0
sp|O43768|ENSA_HUMAN	sp|O43768|ENSA_HUMAN	0	522820	354980
sp|O43776|SYNC_HUMAN	sp|O43776|SYNC_HUMAN	2033300	1789100	1944400
sp|O43809|CPSF5_HUMAN	sp|O43809|CPSF5_HUMAN	0	0	983260
sp|O43852|CALU_HUMAN	sp|O43852|CALU_HUMAN	4443700	5302500	4671000
sp|O60218|AK1BA_HUMAN	sp|O60218|AK1BA_HUMAN	3403800	3880000	4591400
sp|O60361|NDK8_HUMAN	sp|O60361|NDK8_HUMAN	1273300	1137000	1335200
sp|O60506|HNRPQ_HUMAN	sp|O60506|HNRPQ_HUMAN	7252300	7027200	6396700
sp|O60610|DIAP1_HUMAN	sp|O60610|DIAP1_HUMAN	1327400	1988700	1339700
sp|O60664|PLIN3_HUMAN	sp|O60664|PLIN3_HUMAN	4272600	4742500	4334700
sp|O60701|UGDH_HUMAN	sp|O60701|UGDH_HUMAN	2728100	2753100	3552100
sp|O60716|CTND1_HUMAN	sp|O60716|CTND1_HUMAN	0	762090	855890
sp|Q99880|H2B1L_HUMAN;sp|Q99879|H2B1M_HUMAN;sp|Q99877|H2B1N_HUMAN;sp|Q93079|H2B1H_HUMAN;sp|Q5QNW6|H2B2F_HUMAN;sp|P62807|H2B1C_HUMAN;sp|P58876|H2B1D_HUMAN;sp|P57053|H2BFS_HUMAN;sp|O60814|H2B1K_HUMAN;sp|Q96A08|H2B1A_HUMAN	sp|Q99880|H2B1L_HUMAN;sp|Q99879|H2B1M_HUMAN;sp|Q99877|H2B1N_HUMAN;sp|Q93079|H2B1H_HUMAN;sp|Q5QNW6|H2B2F_HUMAN;sp|P62807|H2B1C_HUMAN;sp|P58876|H2B1D_HUMAN;sp|P57053|H2BFS_HUMAN;sp|O60814|H2B1K_HUMAN	120780000	104510000	65816000
sp|O60841|IF2P_HUMAN	sp|O60841|IF2P_HUMAN	3355200	4036800	3526600
sp|O60869|EDF1_HUMAN	sp|O60869|EDF1_HUMAN	0	961940	897720
sp|O60884|DNJA2_HUMAN	sp|O60884|DNJA2_HUMAN	791570	658650	758580
sp|O60925|PFD1_HUMAN	sp|O60925|PFD1_HUMAN	539760	0	0
sp|O60927|PP1RB_HUMAN	sp|O60927|PP1RB_HUMAN	0	365130	0
sp|O75083|WDR1_HUMAN	sp|O75083|WDR1_HUMAN	3191600	2603100	3207200
sp|O75131|CPNE3_HUMAN	sp|O75131|CPNE3_HUMAN	670810	523540	555080
sp|O75223|GGCT_HUMAN	sp|O75223|GGCT_HUMAN	0	0	276770
sp|O75340|PDCD6_HUMAN	sp|O75340|PDCD6_HUMAN	0	0	0
sp|O75347|TBCA_HUMAN	sp|O75347|TBCA_HUMAN	4443300	3792800	4276400
sp|O75367|H2AY_HUMAN;sp|Q9P0M6|H2AW_HUMAN	sp|O75367|H2AY_HUMAN	3973400	3239300	2819000
sp|O75369|FLNB_HUMAN	sp|O75369|FLNB_HUMAN	50735000	51557000	48847000
sp|O75390|CISY_HUMAN	sp|O75390|CISY_HUMAN	1948600	1982300	2362000
sp|O75396|SC22B_HUMAN	sp|O75396|SC22B_HUMAN	434490	0	538460
sp|O75489|NDUS3_HUMAN	sp|O75489|NDUS3_HUMAN	0	0	270090
sp|O75494|SRS10_HUMAN;sp|Q8WXF0|SRS12_HUMAN	sp|O75494|SRS10_HUMAN;sp|Q8WXF0|SRS12_HUMAN	937830	694000	679830
sp|O75531|BAF_HUMAN	sp|O75531|BAF_HUMAN	829970	2106500	1157200
sp|O75533|SF3B1_HUMAN	sp|O75533|SF3B1_HUMAN	895800	0	741880
sp|O75534|CSDE1_HUMAN	sp|O75534|CSDE1_HUMAN	840120	976300	913110
sp|O75643|U520_HUMAN	sp|O75643|U520_HUMAN	1900700	1535000	1737600
sp|O75663|TIPRL_HUMAN	sp|O75663|TIPRL_HUMAN	228430	0	249070
sp|O75821|EIF3G_HUMAN	sp|O75821|EIF3G_HUMAN	3302200	2988900	2675400
sp|O75822|EIF3J_HUMAN	sp|O75822|EIF3J_HUMAN	4068400	4834600	2778500
sp|O75874|IDHC_HUMAN	sp|O75874|IDHC_HUMAN	0	786660	610760
sp|O75886|STAM2_HUMAN;sp|Q92783|STAM1_HUMAN	sp|O75886|STAM2_HUMAN;sp|Q92783|STAM1_HUMAN	263270	245410	235300
sp|O75964|ATP5L_HUMAN	sp|O75964|ATP5L_HUMAN	0	0	256010
sp|O76021|RL1D1_HUMAN	sp|O76021|RL1D1_HUMAN	651500	473780	533340
sp|O94826|TOM70_HUMAN	sp|O94826|TOM70_HUMAN	988400	720290	1031400
sp|O95197|RTN3_HUMAN	sp|O95197|RTN3_HUMAN	774410	1229800	793540
sp|O95202|LETM1_HUMAN	sp|O95202|LETM1_HUMAN	0	0	0
sp|O95292|VAPB_HUMAN	sp|O95292|VAPB_HUMAN	1807900	2339800	2294100
sp|O95336|6PGL_HUMAN	sp|O95336|6PGL_HUMAN	1496200	1656100	1350400
sp|O95373|IPO7_HUMAN	sp|O95373|IPO7_HUMAN	572930	619220	527680
sp|O95399|UTS2_HUMAN	sp|O95399|UTS2_HUMAN	3927600	2856800	4395400
sp|O95433|AHSA1_HUMAN	sp|O95433|AHSA1_HUMAN	2924100	4191800	4045800
sp|O95573|ACSL3_HUMAN;sp|O60488|ACSL4_HUMAN	sp|O95573|ACSL3_HUMAN	2679800	1957200	2321700
sp|O95684|FR1OP_HUMAN	sp|O95684|FR1OP_HUMAN	0	0	0
sp|O95777|LSM8_HUMAN	sp|O95777|LSM8_HUMAN	354740	0	328200
sp|O95793|STAU1_HUMAN	sp|O95793|STAU1_HUMAN	0	264770	358410
sp|O95816|BAG2_HUMAN	sp|O95816|BAG2_HUMAN	0	345340	757780
sp|O95831|AIFM1_HUMAN	sp|O95831|AIFM1_HUMAN	811620	747330	599900
sp|O95861|BPNT1_HUMAN	sp|O95861|BPNT1_HUMAN	486560	0	0
sp|O95881|TXD12_HUMAN	sp|O95881|TXD12_HUMAN	689680	595920	0
sp|O95972|BMP15_HUMAN	sp|O95972|BMP15_HUMAN	0	460940	347890
sp|O96008|TOM40_HUMAN	sp|O96008|TOM40_HUMAN	0	0	565820
sp|P00167|CYB5_HUMAN	sp|P00167|CYB5_HUMAN	925050	756510	0
sp|P00338|LDHA_HUMAN	sp|P00338|LDHA_HUMAN	102920000	102930000	102430000
sp|P00387|NB5R3_HUMAN	sp|P00387|NB5R3_HUMAN	866230	663550	603810
sp|P00390|GSHR_HUMAN	sp|P00390|GSHR_HUMAN	717700	1069100	571420
sp|P00403|COX2_HUMAN	sp|P00403|COX2_HUMAN	1278700	1251800	1307800
sp|P00441|SODC_HUMAN	sp|P00441|SODC_HUMAN	3202200	2575900	3296200
sp|P00491|PNPH_HUMAN	sp|P00491|PNPH_HUMAN	0	0	260570
sp|P00492|HPRT_HUMAN	sp|P00492|HPRT_HUMAN	1452600	1212100	1324100
sp|P00505|AATM_HUMAN	sp|P00505|AATM_HUMAN	5945400	6205900	6066600
sp|P00558|PGK1_HUMAN;sp|P07205|PGK2_HUMAN	sp|P00558|PGK1_HUMAN	25577000	28494000	30036000
sp|P00966|ASSY_HUMAN	sp|P00966|ASSY_HUMAN	0	0	408040
sp|P30512|1A29_HUMAN;sp|P30459|1A74_HUMAN;sp|P30457|1A66_HUMAN;sp|P30456|1A43_HUMAN;sp|P30455|1A36_HUMAN;sp|P30453|1A34_HUMAN;sp|P30450|1A26_HUMAN;sp|P30447|1A23_HUMAN;sp|P30443|1A01_HUMAN;sp|P18462|1A25_HUMAN;sp|P16190|1A33_HUMAN;sp|P16189|1A31_HUMAN;sp|P16188|1A30_HUMAN;sp|P13746|1A11_HUMAN;sp|P10316|1A69_HUMAN;sp|P10314|1A32_HUMAN;sp|P05534|1A24_HUMAN;sp|P04439|1A03_HUMAN;sp|P01892|1A02_HUMAN;…	sp|P30512|1A29_HUMAN;sp|P30459|1A74_HUMAN;sp|P30457|1A66_HUMAN;sp|P30456|1A43_HUMAN;sp|P30455|1A36_HUMAN;sp|P30453|1A34_HUMAN;sp|P30450|1A26_HUMAN;sp|P30447|1A23_HUMAN;sp|P30443|1A01_HUMAN;sp|P18462|1A25_HUMAN;sp|P16190|1A33_HUMAN;sp|P16189|1A31_HUMAN;sp|P16188|1A30_HUMAN;sp|P13746|1A11_HUMAN;sp|P10316|1A69_HUMAN;sp|P10314|1A32_HUMAN;sp|P05534|1A24_HUMAN;sp|P04439|1A03_HUMAN;sp|P01892|1A02_HUMAN;…	1163500	0	1171700
sp|P02545|LMNA_HUMAN	sp|P02545|LMNA_HUMAN	35923000	28926000	25536000
sp|P02751|FINC_HUMAN	sp|P02751|FINC_HUMAN	23707000	0	0
sp|P02786|TFR1_HUMAN	sp|P02786|TFR1_HUMAN	7617100	5572000	6899400
sp|P04075|ALDOA_HUMAN;sp|P05062|ALDOB_HUMAN	sp|P04075|ALDOA_HUMAN	98957000	105300000	118180000
sp|P04080|CYTB_HUMAN	sp|P04080|CYTB_HUMAN	6176200	8835200	5731700
sp|P04083|ANXA1_HUMAN	sp|P04083|ANXA1_HUMAN	33368000	44271000	37074000
sp|P04181|OAT_HUMAN	sp|P04181|OAT_HUMAN	4110900	3187400	3503600
sp|P04406|G3P_HUMAN	sp|P04406|G3P_HUMAN	124550000	149380000	137180000
sp|P04632|CPNS1_HUMAN	sp|P04632|CPNS1_HUMAN	2437900	2314500	3391400
sp|P04637|P53_HUMAN	sp|P04637|P53_HUMAN	1820900	1600600	1268800
sp|P04792|HSPB1_HUMAN	sp|P04792|HSPB1_HUMAN	11537000	12194000	11838000
sp|P04843|RPN1_HUMAN	sp|P04843|RPN1_HUMAN	5745200	5443100	5169200
sp|P04844|RPN2_HUMAN	sp|P04844|RPN2_HUMAN	2278100	1274000	1196700
sp|P04899|GNAI2_HUMAN;sp|P63096|GNAI1_HUMAN;sp|P09471|GNAO_HUMAN;sp|P08754|GNAI3_HUMAN;sp|P11488|GNAT1_HUMAN;sp|P19087|GNAT2_HUMAN;sp|A8MTJ3|GNAT3_HUMAN;sp|P38405|GNAL_HUMAN;sp|P63092|GNAS2_HUMAN;sp|Q5JWF2|GNAS1_HUMAN	sp|P04899|GNAI2_HUMAN;sp|P63096|GNAI1_HUMAN;sp|P09471|GNAO_HUMAN;sp|P08754|GNAI3_HUMAN	0	0	1359200
sp|Q99878|H2A1J_HUMAN;sp|Q96KK5|H2A1H_HUMAN;sp|Q9BTM1|H2AJ_HUMAN;sp|Q16777|H2A2C_HUMAN;sp|Q93077|H2A1C_HUMAN;sp|Q7L7L0|H2A3_HUMAN;sp|Q6FI13|H2A2A_HUMAN;sp|P20671|H2A1D_HUMAN;sp|P0C0S8|H2A1_HUMAN;sp|P04908|H2A1B_HUMAN;sp|Q96QV6|H2A1A_HUMAN;sp|P16104|H2AX_HUMAN	sp|Q99878|H2A1J_HUMAN;sp|Q96KK5|H2A1H_HUMAN;sp|Q9BTM1|H2AJ_HUMAN;sp|Q16777|H2A2C_HUMAN;sp|Q93077|H2A1C_HUMAN;sp|Q7L7L0|H2A3_HUMAN;sp|Q6FI13|H2A2A_HUMAN;sp|P20671|H2A1D_HUMAN;sp|P0C0S8|H2A1_HUMAN;sp|P04908|H2A1B_HUMAN;sp|Q96QV6|H2A1A_HUMAN;sp|P16104|H2AX_HUMAN	150940000	156990000	109860000
sp|P05023|AT1A1_HUMAN;sp|P13637|AT1A3_HUMAN;sp|P50993|AT1A2_HUMAN;sp|Q13733|AT1A4_HUMAN;sp|P20648|ATP4A_HUMAN;sp|P54707|AT12A_HUMAN	sp|P05023|AT1A1_HUMAN	6962500	5249500	4993700
sp|P05026|AT1B1_HUMAN	sp|P05026|AT1B1_HUMAN	0	0	464750
sp|P05141|ADT2_HUMAN;sp|P12235|ADT1_HUMAN;sp|Q9H0C2|ADT4_HUMAN	sp|P05141|ADT2_HUMAN	30189000	21596000	21855000
sp|P05198|IF2A_HUMAN	sp|P05198|IF2A_HUMAN	7202900	6892100	7421600
sp|P05387|RLA2_HUMAN	sp|P05387|RLA2_HUMAN	33628000	31279000	30175000
sp|P05388|RLA0_HUMAN;sp|Q8NHW5|RLA0L_HUMAN	sp|P05388|RLA0_HUMAN;sp|Q8NHW5|RLA0L_HUMAN	13415000	15727000	10663000
sp|P05455|LA_HUMAN	sp|P05455|LA_HUMAN	589510	550940	865290
sp|P05556|ITB1_HUMAN	sp|P05556|ITB1_HUMAN	0	883170	546180
sp|P05783|K1C18_HUMAN;CON__H-INV:HIT000015463	sp|P05783|K1C18_HUMAN	131540000	119390000	178190000
sp|P06454|PTMA_HUMAN	sp|P06454|PTMA_HUMAN	26803000	21981000	22387000
sp|P06493|CDK1_HUMAN;sp|P24941|CDK2_HUMAN;sp|Q00526|CDK3_HUMAN;sp|Q00535|CDK5_HUMAN;sp|P11802|CDK4_HUMAN;sp|Q00534|CDK6_HUMAN;sp|P50750|CDK9_HUMAN;sp|Q96Q40|CDK15_HUMAN;sp|O94921|CDK14_HUMAN;sp|Q07002|CDK18_HUMAN;sp|Q00536|CDK16_HUMAN;sp|Q00537|CDK17_HUMAN;sp|Q9NYV4|CDK12_HUMAN;sp|Q14004|CDK13_HUMAN	sp|P06493|CDK1_HUMAN	6488100	5973400	5709000
sp|P06576|ATPB_HUMAN	sp|P06576|ATPB_HUMAN	14327000	15908000	15256000
sp|P06702|S10A9_HUMAN	sp|P06702|S10A9_HUMAN	0	0	0
sp|P06703|S10A6_HUMAN	sp|P06703|S10A6_HUMAN	0	602230	2318000
sp|P06730|IF4E_HUMAN	sp|P06730|IF4E_HUMAN	490760	399690	0
sp|P06733|ENOA_HUMAN;sp|P09104|ENOG_HUMAN	sp|P06733|ENOA_HUMAN	93302000	118810000	82356000
sp|P06737|PYGL_HUMAN	sp|P06737|PYGL_HUMAN	0	283440	0
sp|P06744|G6PI_HUMAN;CON__Q3ZBD7	sp|P06744|G6PI_HUMAN	14271000	15993000	13663000
sp|P06748|NPM_HUMAN	sp|P06748|NPM_HUMAN	20246000	24325000	26043000
sp|P06753|TPM3_HUMAN	sp|P06753|TPM3_HUMAN	9660500	8483200	8667200
sp|Q8N257|H2B3B_HUMAN;sp|Q16778|H2B2E_HUMAN;sp|P33778|H2B1B_HUMAN;sp|P23527|H2B1O_HUMAN;sp|P06899|H2B1J_HUMAN;sp|Q6DRA6|H2B2D_HUMAN;sp|Q6DN03|H2B2C_HUMAN	sp|Q8N257|H2B3B_HUMAN;sp|Q16778|H2B2E_HUMAN;sp|P33778|H2B1B_HUMAN;sp|P23527|H2B1O_HUMAN;sp|P06899|H2B1J_HUMAN;sp|Q6DRA6|H2B2D_HUMAN;sp|Q6DN03|H2B2C_HUMAN	8297200	8476500	4080600
sp|P07099|HYEP_HUMAN	sp|P07099|HYEP_HUMAN	887080	650550	1119800
sp|P07108|ACBP_HUMAN	sp|P07108|ACBP_HUMAN	0	0	1028600
sp|P07195|LDHB_HUMAN	sp|P07195|LDHB_HUMAN	87637000	84530000	87420000
sp|P07237|PDIA1_HUMAN	sp|P07237|PDIA1_HUMAN	15360000	12747000	15891000
sp|P07305|H10_HUMAN	sp|P07305|H10_HUMAN	900090	0	892300
sp|P07339|CATD_HUMAN	sp|P07339|CATD_HUMAN	2735500	2620400	2445800
sp|P07355|ANXA2_HUMAN;sp|A6NMY6|AXA2L_HUMAN	sp|P07355|ANXA2_HUMAN;sp|A6NMY6|AXA2L_HUMAN	145410000	156020000	176510000
sp|P07384|CAN1_HUMAN	sp|P07384|CAN1_HUMAN	6397400	7567500	6185600
sp|P07437|TBB5_HUMAN;sp|A6NNZ2|TBB8L_HUMAN	sp|P07437|TBB5_HUMAN	16506000	29151000	20593000
sp|P07602|SAP_HUMAN	sp|P07602|SAP_HUMAN	0	1163900	910870
sp|P07737|PROF1_HUMAN;CON__P02584	sp|P07737|PROF1_HUMAN	54892000	75142000	69510000
sp|P07741|APT_HUMAN	sp|P07741|APT_HUMAN	1546700	1145400	1432000
sp|P07814|SYEP_HUMAN	sp|P07814|SYEP_HUMAN	597610	1370600	2566300
sp|P07858|CATB_HUMAN	sp|P07858|CATB_HUMAN	706240	746310	937250
sp|P07900|HS90A_HUMAN;sp|Q14568|HS902_HUMAN;sp|Q58FG0|HS905_HUMAN;sp|Q58FG1|HS904_HUMAN	sp|P07900|HS90A_HUMAN	295610000	335130000	302680000
sp|P07910|HNRPC_HUMAN;sp|P0DMR1|HNRC4_HUMAN;sp|O60812|HNRC1_HUMAN;sp|B7ZW38|HNRC3_HUMAN;sp|B2RXH8|HNRC2_HUMAN	sp|P07910|HNRPC_HUMAN;sp|P0DMR1|HNRC4_HUMAN;sp|O60812|HNRC1_HUMAN;sp|B7ZW38|HNRC3_HUMAN;sp|B2RXH8|HNRC2_HUMAN	17745000	14476000	16588000
sp|P07954|FUMH_HUMAN	sp|P07954|FUMH_HUMAN	2191600	1649200	1482700
sp|P08195|4F2_HUMAN	sp|P08195|4F2_HUMAN	15950000	14634000	12133000
sp|P08238|HS90B_HUMAN;sp|Q58FF7|H90B3_HUMAN;sp|Q58FF8|H90B2_HUMAN	sp|P08238|HS90B_HUMAN	73864000	72957000	69732000
sp|P08319|ADH4_HUMAN	sp|P08319|ADH4_HUMAN	104930000	0	0
sp|P08670|VIME_HUMAN;sp|P17661|DESM_HUMAN;sp|Q16352|AINX_HUMAN;sp|P07196|NFL_HUMAN;sp|P07197|NFM_HUMAN;sp|P12036|NFH_HUMAN	sp|P08670|VIME_HUMAN	666820	5397300	11789000
sp|P08708|RS17_HUMAN	sp|P08708|RS17_HUMAN	0	1071200	1194200
sp|P08758|ANXA5_HUMAN	sp|P08758|ANXA5_HUMAN	23343000	26539000	23778000
sp|P08865|RSSA_HUMAN	sp|P08865|RSSA_HUMAN	25369000	21555000	21113000
sp|P09012|SNRPA_HUMAN	sp|P09012|SNRPA_HUMAN	0	364680	248260
sp|P09211|GSTP1_HUMAN	sp|P09211|GSTP1_HUMAN	20483000	25752000	20916000
sp|P09382|LEG1_HUMAN	sp|P09382|LEG1_HUMAN	8877200	10471000	9014700
sp|P09429|HMGB1_HUMAN;sp|B2RPK0|HGB1A_HUMAN	sp|P09429|HMGB1_HUMAN;sp|B2RPK0|HGB1A_HUMAN	13577000	14561000	12234000
sp|P09525|ANXA4_HUMAN	sp|P09525|ANXA4_HUMAN	614320	532390	0
sp|P09622|DLDH_HUMAN	sp|P09622|DLDH_HUMAN	1477000	1102200	1091600
sp|Q32P51|RA1L2_HUMAN;sp|P09651|ROA1_HUMAN	sp|Q32P51|RA1L2_HUMAN;sp|P09651|ROA1_HUMAN	18012000	18963000	21062000
sp|P09661|RU2A_HUMAN	sp|P09661|RU2A_HUMAN	0	0	135330
sp|P09669|COX6C_HUMAN	sp|P09669|COX6C_HUMAN	889130	528470	819980
sp|P09758|TACD2_HUMAN	sp|P09758|TACD2_HUMAN	826680	0	779950
sp|P09874|PARP1_HUMAN	sp|P09874|PARP1_HUMAN	7123300	6657500	7258700
sp|P09936|UCHL1_HUMAN	sp|P09936|UCHL1_HUMAN	11527000	13816000	16574000
sp|P09960|LKHA4_HUMAN	sp|P09960|LKHA4_HUMAN	830620	917140	1042100
sp|P09972|ALDOC_HUMAN	sp|P09972|ALDOC_HUMAN	1905900	1140500	1884200
sp|Q71UI9|H2AV_HUMAN;sp|P0C0S5|H2AZ_HUMAN	sp|Q71UI9|H2AV_HUMAN;sp|P0C0S5|H2AZ_HUMAN	5671900	3608700	4273000
sp|P62987|RL40_HUMAN;sp|P62979|RS27A_HUMAN;sp|P0CG47|UBB_HUMAN;sp|P0CG48|UBC_HUMAN	sp|P62987|RL40_HUMAN;sp|P62979|RS27A_HUMAN;sp|P0CG47|UBB_HUMAN;sp|P0CG48|UBC_HUMAN	114540000	98180000	85795000
sp|P0DMN0|ST1A4_HUMAN;sp|P0DMM9|ST1A3_HUMAN;sp|P50226|ST1A2_HUMAN;sp|P50225|ST1A1_HUMAN	sp|P0DMN0|ST1A4_HUMAN;sp|P0DMM9|ST1A3_HUMAN;sp|P50226|ST1A2_HUMAN;sp|P50225|ST1A1_HUMAN	0	0	239540
sp|P0DMV9|HS71B_HUMAN;sp|P0DMV8|HS71A_HUMAN	sp|P0DMV9|HS71B_HUMAN;sp|P0DMV8|HS71A_HUMAN	42171000	40447000	44322000
sp|P10523|ARRS_HUMAN	sp|P10523|ARRS_HUMAN	3211800	0	0
sp|P10599|THIO_HUMAN	sp|P10599|THIO_HUMAN	44952000	37060000	45904000
sp|P10606|COX5B_HUMAN	sp|P10606|COX5B_HUMAN	1447500	932850	1212400
sp|P10620|MGST1_HUMAN	sp|P10620|MGST1_HUMAN	948270	1824600	1122200
sp|P10644|KAP0_HUMAN	sp|P10644|KAP0_HUMAN	0	0	0
sp|P10809|CH60_HUMAN	sp|P10809|CH60_HUMAN	62530000	58388000	55239000
sp|P11021|GRP78_HUMAN	sp|P11021|GRP78_HUMAN	51058000	52139000	48722000
sp|P11142|HSP7C_HUMAN;sp|P54652|HSP72_HUMAN	sp|P11142|HSP7C_HUMAN	107870000	107560000	114140000
sp|P11166|GTR1_HUMAN	sp|P11166|GTR1_HUMAN	2136000	2046500	2046000
sp|P11172|UMPS_HUMAN	sp|P11172|UMPS_HUMAN	0	236040	0
sp|P11216|PYGB_HUMAN;sp|P11217|PYGM_HUMAN	sp|P11216|PYGB_HUMAN	3848300	3309900	3700800
sp|P11279|LAMP1_HUMAN	sp|P11279|LAMP1_HUMAN	1955700	1858000	1724700
sp|P11387|TOP1_HUMAN	sp|P11387|TOP1_HUMAN	0	0	864590
sp|P11388|TOP2A_HUMAN;sp|Q02880|TOP2B_HUMAN	sp|P11388|TOP2A_HUMAN;sp|Q02880|TOP2B_HUMAN	0	0	0
sp|P11413|G6PD_HUMAN	sp|P11413|G6PD_HUMAN	27596000	28722000	26903000
sp|P11586|C1TC_HUMAN	sp|P11586|C1TC_HUMAN	16442000	15392000	14684000
sp|P11940|PABP1_HUMAN;sp|Q9H361|PABP3_HUMAN;sp|Q4VXU2|PAP1L_HUMAN;sp|Q96DU9|PABP5_HUMAN	sp|P11940|PABP1_HUMAN	13951000	15128000	14026000
sp|P12004|PCNA_HUMAN	sp|P12004|PCNA_HUMAN	8983500	9239400	8131900
sp|P12081|SYHC_HUMAN	sp|P12081|SYHC_HUMAN	758360	0	0
sp|P12236|ADT3_HUMAN	sp|P12236|ADT3_HUMAN	0	0	925420
sp|P12268|IMDH2_HUMAN;sp|P20839|IMDH1_HUMAN	sp|P12268|IMDH2_HUMAN	835200	2912200	3761200
sp|P12429|ANXA3_HUMAN	sp|P12429|ANXA3_HUMAN	10497000	10404000	9156900
sp|P12814|ACTN1_HUMAN;sp|P35609|ACTN2_HUMAN;sp|Q08043|ACTN3_HUMAN	sp|P12814|ACTN1_HUMAN	9682400	9390700	10201000
sp|P12956|XRCC6_HUMAN	sp|P12956|XRCC6_HUMAN	14604000	16128000	14948000
sp|P13010|XRCC5_HUMAN	sp|P13010|XRCC5_HUMAN	9825400	8587400	9142100
sp|P13073|COX41_HUMAN	sp|P13073|COX41_HUMAN	2874400	2424000	2976500
sp|P13489|RINI_HUMAN	sp|P13489|RINI_HUMAN	1136700	1211700	1002200
sp|P13639|EF2_HUMAN	sp|P13639|EF2_HUMAN	27132000	36173000	27168000
sp|P13667|PDIA4_HUMAN	sp|P13667|PDIA4_HUMAN	9257600	8963800	7772600
sp|P13693|TCTP_HUMAN;sp|Q56UQ5|TPT1L_HUMAN	sp|P13693|TCTP_HUMAN;sp|Q56UQ5|TPT1L_HUMAN	1319000	1516200	1872000
sp|P13796|PLSL_HUMAN	sp|P13796|PLSL_HUMAN	14597000	15985000	15623000
sp|P13797|PLST_HUMAN;sp|Q14651|PLSI_HUMAN	sp|P13797|PLST_HUMAN	6671900	7800100	7228000
sp|P13804|ETFA_HUMAN	sp|P13804|ETFA_HUMAN	1057000	762220	690570
sp|Q5VT79|AXA81_HUMAN;sp|P13928|ANXA8_HUMAN	sp|Q5VT79|AXA81_HUMAN;sp|P13928|ANXA8_HUMAN	3237800	4261200	4281000
sp|P13929|ENOB_HUMAN	sp|P13929|ENOB_HUMAN	0	11001000	4270600
sp|P14314|GLU2B_HUMAN	sp|P14314|GLU2B_HUMAN	3917900	3439300	4684000
sp|P14406|CX7A2_HUMAN	sp|P14406|CX7A2_HUMAN	1304600	1115900	863510
sp|P14550|AK1A1_HUMAN	sp|P14550|AK1A1_HUMAN	0	0	533950
sp|P14618|KPYM_HUMAN;sp|P30613|KPYR_HUMAN	sp|P14618|KPYM_HUMAN	205010000	218110000	217580000
sp|P14625|ENPL_HUMAN;sp|Q58FF3|ENPLL_HUMAN	sp|P14625|ENPL_HUMAN	26934000	22203000	23273000
sp|P14866|HNRPL_HUMAN	sp|P14866|HNRPL_HUMAN	0	0	1049800
sp|P14868|SYDC_HUMAN	sp|P14868|SYDC_HUMAN	3021700	3153200	2453700
sp|P14923|PLAK_HUMAN	sp|P14923|PLAK_HUMAN	0	0	302280
sp|P14927|QCR7_HUMAN	sp|P14927|QCR7_HUMAN	0	0	233900
sp|P15121|ALDR_HUMAN	sp|P15121|ALDR_HUMAN	41603000	36940000	41833000
sp|P15170|ERF3A_HUMAN;sp|Q8IYD1|ERF3B_HUMAN	sp|P15170|ERF3A_HUMAN;sp|Q8IYD1|ERF3B_HUMAN	858440	1057900	1382600
sp|P15172|MYOD1_HUMAN	sp|P15172|MYOD1_HUMAN	10252000	12072000	10384000
sp|P15311|EZRI_HUMAN	sp|P15311|EZRI_HUMAN	21687000	20401000	19939000
sp|P15531|NDKA_HUMAN	sp|P15531|NDKA_HUMAN	18218000	22794000	22749000
sp|P15559|NQO1_HUMAN	sp|P15559|NQO1_HUMAN	4059600	3308000	2990300
sp|P15880|RS2_HUMAN	sp|P15880|RS2_HUMAN	11321000	13507000	10875000
sp|P15924|DESP_HUMAN	sp|P15924|DESP_HUMAN	0	1544000	1438800
sp|P16070|CD44_HUMAN	sp|P16070|CD44_HUMAN	4390000	3179700	4234700
sp|P16144|ITB4_HUMAN	sp|P16144|ITB4_HUMAN	0	0	548330
sp|P16152|CBR1_HUMAN	sp|P16152|CBR1_HUMAN	998990	1029500	814460
sp|P16401|H15_HUMAN	sp|P16401|H15_HUMAN	21636000	13970000	20629000
sp|P16402|H13_HUMAN;sp|P10412|H14_HUMAN;sp|P22492|H1T_HUMAN;sp|Q02539|H11_HUMAN	sp|P16402|H13_HUMAN;sp|P10412|H14_HUMAN	1931300	1155600	1258100
sp|P16403|H12_HUMAN	sp|P16403|H12_HUMAN	64664000	41233000	46545000
sp|P16422|EPCAM_HUMAN	sp|P16422|EPCAM_HUMAN	504610	474190	428400
sp|P16615|AT2A2_HUMAN;sp|O14983|AT2A1_HUMAN	sp|P16615|AT2A2_HUMAN;sp|O14983|AT2A1_HUMAN	1906400	1551700	1468500
sp|P16949|STMN1_HUMAN	sp|P16949|STMN1_HUMAN	3076800	3502300	2856500
sp|P16989|YBOX3_HUMAN	sp|P16989|YBOX3_HUMAN	4598700	4293300	3650600
sp|P17066|HSP76_HUMAN;sp|P48741|HSP77_HUMAN	sp|P17066|HSP76_HUMAN;sp|P48741|HSP77_HUMAN	9637000	7742400	15269000
sp|P17096|HMGA1_HUMAN	sp|P17096|HMGA1_HUMAN	11469000	8489800	8666100
sp|P17301|ITA2_HUMAN	sp|P17301|ITA2_HUMAN	1505400	0	1225700
sp|P17655|CAN2_HUMAN	sp|P17655|CAN2_HUMAN	7877100	7098900	6701500
sp|P17812|PYRG1_HUMAN;sp|Q9NRF8|PYRG2_HUMAN	sp|P17812|PYRG1_HUMAN;sp|Q9NRF8|PYRG2_HUMAN	1776000	1338600	1752300
sp|P17844|DDX5_HUMAN	sp|P17844|DDX5_HUMAN	14068000	9704000	9176900
sp|P17931|LEG3_HUMAN	sp|P17931|LEG3_HUMAN	0	2162400	1925400
sp|P17980|PRS6A_HUMAN	sp|P17980|PRS6A_HUMAN	746990	1494200	1647300
sp|P17987|TCPA_HUMAN	sp|P17987|TCPA_HUMAN	5047600	5859300	6624400
sp|P18077|RL35A_HUMAN	sp|P18077|RL35A_HUMAN	4241700	3134200	2969900
sp|P18085|ARF4_HUMAN	sp|P18085|ARF4_HUMAN	4238600	4081700	4387000
sp|P18124|RL7_HUMAN	sp|P18124|RL7_HUMAN	19019000	16778000	13850000
sp|P18206|VINC_HUMAN	sp|P18206|VINC_HUMAN	16752000	14461000	13879000
sp|P18621|RL17_HUMAN	sp|P18621|RL17_HUMAN	8835400	7480500	5930800
sp|P18669|PGAM1_HUMAN;sp|P15259|PGAM2_HUMAN;sp|Q8N0Y7|PGAM4_HUMAN	sp|P18669|PGAM1_HUMAN;sp|P15259|PGAM2_HUMAN;sp|Q8N0Y7|PGAM4_HUMAN	2315100	1926000	2159800
sp|P18754|RCC1_HUMAN	sp|P18754|RCC1_HUMAN	2875200	2053200	1818900
sp|P19338|NUCL_HUMAN	sp|P19338|NUCL_HUMAN	51217000	45450000	42795000
sp|P19367|HXK1_HUMAN;sp|Q2TB90|HKDC1_HUMAN	sp|P19367|HXK1_HUMAN	1065300	0	915760
sp|P19525|E2AK2_HUMAN	sp|P19525|E2AK2_HUMAN	908050	0	805400
sp|P19623|SPEE_HUMAN	sp|P19623|SPEE_HUMAN	0	416800	0
sp|P20042|IF2B_HUMAN	sp|P20042|IF2B_HUMAN	5461400	5454300	5529800
sp|P20073|ANXA7_HUMAN	sp|P20073|ANXA7_HUMAN	1655600	5373300	1898400
sp|P20290|BTF3_HUMAN	sp|P20290|BTF3_HUMAN	3619100	4340700	3213300
sp|Q9NRW1|RAB6B_HUMAN;sp|P20340|RAB6A_HUMAN	sp|Q9NRW1|RAB6B_HUMAN;sp|P20340|RAB6A_HUMAN	457240	399140	618330
sp|P20618|PSB1_HUMAN	sp|P20618|PSB1_HUMAN	1836900	2019100	2328900
sp|P20645|MPRD_HUMAN	sp|P20645|MPRD_HUMAN	0	0	642500
sp|P20674|COX5A_HUMAN	sp|P20674|COX5A_HUMAN	1362400	0	1555200
sp|P20700|LMNB1_HUMAN	sp|P20700|LMNB1_HUMAN	6158400	4100300	4241000
sp|P20810|ICAL_HUMAN	sp|P20810|ICAL_HUMAN	361850	0	0
sp|P20962|PTMS_HUMAN	sp|P20962|PTMS_HUMAN	0	1427800	2262300
sp|P21266|GSTM3_HUMAN	sp|P21266|GSTM3_HUMAN	496200	703360	906780
sp|P21333|FLNA_HUMAN	sp|P21333|FLNA_HUMAN	100720000	98421000	100080000
sp|P21399|ACOC_HUMAN	sp|P21399|ACOC_HUMAN	350570	344270	218010
sp|P21796|VDAC1_HUMAN	sp|P21796|VDAC1_HUMAN	10138000	10487000	8182900
sp|P21964|COMT_HUMAN	sp|P21964|COMT_HUMAN	0	0	0
sp|P21980|TGM2_HUMAN	sp|P21980|TGM2_HUMAN	21659000	32132000	19162000
sp|P22061|PIMT_HUMAN	sp|P22061|PIMT_HUMAN	0	0	169590
sp|P22087|FBRL_HUMAN	sp|P22087|FBRL_HUMAN	1389800	1134700	0
sp|P22234|PUR6_HUMAN	sp|P22234|PUR6_HUMAN	8993000	7295200	6727700
sp|P22307|NLTP_HUMAN	sp|P22307|NLTP_HUMAN	591290	0	0
sp|P22314|UBA1_HUMAN	sp|P22314|UBA1_HUMAN	5051200	4249000	3801300
sp|P22392|NDKB_HUMAN	sp|P22392|NDKB_HUMAN	0	1866500	1867900
sp|P22626|ROA2_HUMAN	sp|P22626|ROA2_HUMAN	54818000	52821000	45028000
sp|P22676|CALB2_HUMAN;sp|P05937|CALB1_HUMAN	sp|P22676|CALB2_HUMAN	1510900	3366500	1761600
sp|P22695|QCR2_HUMAN	sp|P22695|QCR2_HUMAN	1557900	1354900	1606400
sp|P23229|ITA6_HUMAN	sp|P23229|ITA6_HUMAN	0	1061300	0
sp|P23246|SFPQ_HUMAN	sp|P23246|SFPQ_HUMAN	10328000	7028600	7141500
sp|P23284|PPIB_HUMAN	sp|P23284|PPIB_HUMAN	3688300	6082800	4658300
sp|P23396|RS3_HUMAN	sp|P23396|RS3_HUMAN	27837000	34141000	28189000
sp|P23526|SAHH_HUMAN	sp|P23526|SAHH_HUMAN	20751000	21002000	16377000
sp|P23528|COF1_HUMAN;sp|Q9Y281|COF2_HUMAN	sp|P23528|COF1_HUMAN	87142000	89186000	73636000
sp|P23588|IF4B_HUMAN	sp|P23588|IF4B_HUMAN	1680900	2049800	0
sp|P23919|KTHY_HUMAN	sp|P23919|KTHY_HUMAN	5037400	4554900	6383200
sp|P33947|ERD22_HUMAN;sp|P24390|ERD21_HUMAN	sp|P33947|ERD22_HUMAN;sp|P24390|ERD21_HUMAN	390570	392960	483610
sp|P24666|PPAC_HUMAN	sp|P24666|PPAC_HUMAN	1144300	1679900	967560
sp|P25205|MCM3_HUMAN	sp|P25205|MCM3_HUMAN	2785200	2102000	2424200
sp|P25398|RS12_HUMAN	sp|P25398|RS12_HUMAN	0	904990	0
sp|P25685|DNJB1_HUMAN	sp|P25685|DNJB1_HUMAN	2275200	2110000	1313300
sp|P25705|ATPA_HUMAN	sp|P25705|ATPA_HUMAN	18363000	15677000	16306000
sp|P25786|PSA1_HUMAN	sp|P25786|PSA1_HUMAN	2381000	2398700	2349300
sp|P25787|PSA2_HUMAN	sp|P25787|PSA2_HUMAN	0	0	926570
sp|P25788|PSA3_HUMAN	sp|P25788|PSA3_HUMAN	3441200	2170800	3304600
sp|P25789|PSA4_HUMAN	sp|P25789|PSA4_HUMAN	1957100	2052700	1997500
sp|P26038|MOES_HUMAN	sp|P26038|MOES_HUMAN	9229900	8672400	10132000
sp|P26196|DDX6_HUMAN	sp|P26196|DDX6_HUMAN	708040	873230	597870
sp|P26368|U2AF2_HUMAN	sp|P26368|U2AF2_HUMAN	2271000	2094700	2151500
sp|P26373|RL13_HUMAN	sp|P26373|RL13_HUMAN	9987900	9833300	10867000
sp|P26447|S10A4_HUMAN	sp|P26447|S10A4_HUMAN	904970	2070400	0
sp|P26583|HMGB2_HUMAN	sp|P26583|HMGB2_HUMAN	2778300	2173200	2806700
sp|P26599|PTBP1_HUMAN	sp|P26599|PTBP1_HUMAN	5663600	6409400	5230900
sp|P26639|SYTC_HUMAN;sp|A2RTX5|SYTC2_HUMAN	sp|P26639|SYTC_HUMAN	7415900	7971400	9658200
sp|P26640|SYVC_HUMAN	sp|P26640|SYVC_HUMAN	1675700	2020100	1578900
sp|P26641|EF1G_HUMAN	sp|P26641|EF1G_HUMAN	32530000	34855000	26755000
sp|P27348|1433T_HUMAN	sp|P27348|1433T_HUMAN	8038500	8449500	8405700
sp|P27635|RL10_HUMAN	sp|P27635|RL10_HUMAN	1414200	1224200	1959200
sp|P27695|APEX1_HUMAN	sp|P27695|APEX1_HUMAN	942380	850440	1192900
sp|P27797|CALR_HUMAN	sp|P27797|CALR_HUMAN	1816300	4446500	2917200
sp|P27816|MAP4_HUMAN	sp|P27816|MAP4_HUMAN	6311900	4797000	4883000
sp|P27824|CALX_HUMAN	sp|P27824|CALX_HUMAN	11984000	10047000	13012000
sp|P28066|PSA5_HUMAN	sp|P28066|PSA5_HUMAN	6266600	6734200	5564400
sp|P28072|PSB6_HUMAN	sp|P28072|PSB6_HUMAN	2436600	2010500	1720500
sp|P28074|PSB5_HUMAN	sp|P28074|PSB5_HUMAN	1402000	1339600	1488200
sp|P29373|RABP2_HUMAN;sp|P29762|RABP1_HUMAN	sp|P29373|RABP2_HUMAN	2791700	2445000	2774300
sp|P29401|TKT_HUMAN	sp|P29401|TKT_HUMAN	34599000	31023000	32756000
sp|P29692|EF1D_HUMAN	sp|P29692|EF1D_HUMAN	36144000	36763000	27889000
sp|P29966|MARCS_HUMAN	sp|P29966|MARCS_HUMAN	4375100	4790400	5061400
sp|P30040|ERP29_HUMAN	sp|P30040|ERP29_HUMAN	1205600	1412300	842960
sp|P30041|PRDX6_HUMAN	sp|P30041|PRDX6_HUMAN	8745700	7273800	7902700
sp|P30043|BLVRB_HUMAN	sp|P30043|BLVRB_HUMAN	2054400	2222100	2111200
sp|P30044|PRDX5_HUMAN	sp|P30044|PRDX5_HUMAN	6625100	6217400	6268000
sp|P30048|PRDX3_HUMAN	sp|P30048|PRDX3_HUMAN	1512100	996610	1557300
sp|P30049|ATPD_HUMAN	sp|P30049|ATPD_HUMAN	1475400	1348100	1879600
sp|P30050|RL12_HUMAN	sp|P30050|RL12_HUMAN	6842800	6481100	5733400
sp|P30084|ECHM_HUMAN	sp|P30084|ECHM_HUMAN	408560	362720	294490
sp|P30085|KCY_HUMAN	sp|P30085|KCY_HUMAN	653480	0	420420
sp|P30086|PEBP1_HUMAN	sp|P30086|PEBP1_HUMAN	2875200	2942200	3011100
sp|P30101|PDIA3_HUMAN	sp|P30101|PDIA3_HUMAN	19930000	18842000	20010000
sp|P30153|2AAA_HUMAN;sp|P30154|2AAB_HUMAN	sp|P30153|2AAA_HUMAN	2544800	2615300	2819500
sp|P30405|PPIF_HUMAN	sp|P30405|PPIF_HUMAN	915380	969810	1090700
sp|P30519|HMOX2_HUMAN	sp|P30519|HMOX2_HUMAN	0	0	387100
sp|P30520|PURA2_HUMAN	sp|P30520|PURA2_HUMAN	583530	686660	698360
sp|P30566|PUR8_HUMAN	sp|P30566|PUR8_HUMAN	0	0	384820
sp|P30626|SORCN_HUMAN	sp|P30626|SORCN_HUMAN	2268500	2337100	2373300
sp|P30740|ILEU_HUMAN	sp|P30740|ILEU_HUMAN	2125700	2433500	2219100
sp|P30838|AL3A1_HUMAN;sp|P48448|AL3B2_HUMAN;sp|P43353|AL3B1_HUMAN;sp|P51648|AL3A2_HUMAN	sp|P30838|AL3A1_HUMAN	1323600	1221000	1346800
sp|P31040|SDHA_HUMAN	sp|P31040|SDHA_HUMAN	880010	1005500	846270
sp|P31150|GDIA_HUMAN	sp|P31150|GDIA_HUMAN	651000	655670	0
sp|P31153|METK2_HUMAN	sp|P31153|METK2_HUMAN	1768700	2143800	2269900
sp|P31689|DNJA1_HUMAN	sp|P31689|DNJA1_HUMAN	1548900	1108000	1314600
sp|P31930|QCR1_HUMAN	sp|P31930|QCR1_HUMAN	1415300	1079900	1077500
sp|P31939|PUR9_HUMAN	sp|P31939|PUR9_HUMAN	8213400	7919100	6952400
sp|P31942|HNRH3_HUMAN	sp|P31942|HNRH3_HUMAN	1442400	1724800	2572200
sp|P31943|HNRH1_HUMAN;sp|P55795|HNRH2_HUMAN	sp|P31943|HNRH1_HUMAN;sp|P55795|HNRH2_HUMAN	4682400	4929600	7039500
sp|P31946|1433B_HUMAN	sp|P31946|1433B_HUMAN	7818700	6765200	7014900
sp|P31947|1433S_HUMAN	sp|P31947|1433S_HUMAN	4235100	5809100	9713600
sp|P31948|STIP1_HUMAN	sp|P31948|STIP1_HUMAN	15152000	14440000	14175000
sp|P31949|S10AB_HUMAN	sp|P31949|S10AB_HUMAN	6115200	6953800	6605600
sp|P32119|PRDX2_HUMAN	sp|P32119|PRDX2_HUMAN	6666600	5365000	4511300
sp|P32969|RL9_HUMAN	sp|P32969|RL9_HUMAN	5158300	6738500	5060100
sp|P33176|KINH_HUMAN;sp|O60282|KIF5C_HUMAN;sp|Q12840|KIF5A_HUMAN	sp|P33176|KINH_HUMAN	696780	905170	0
sp|P33316|DUT_HUMAN	sp|P33316|DUT_HUMAN	0	0	513220
sp|P33992|MCM5_HUMAN	sp|P33992|MCM5_HUMAN	876320	1313000	2156900
sp|P33993|MCM7_HUMAN	sp|P33993|MCM7_HUMAN	0	0	524480
sp|P34897|GLYM_HUMAN	sp|P34897|GLYM_HUMAN	2039300	1242400	1416300
sp|P34932|HSP74_HUMAN	sp|P34932|HSP74_HUMAN	4410600	4142800	3047200
sp|P35030|TRY3_HUMAN	sp|P35030|TRY3_HUMAN	6450200	5541600	5249300
sp|P35080|PROF2_HUMAN	sp|P35080|PROF2_HUMAN	1000500	729970	866800
sp|P35232|PHB_HUMAN	sp|P35232|PHB_HUMAN	10451000	9016000	10095000
sp|P35237|SPB6_HUMAN;sp|P50452|SPB8_HUMAN	sp|P35237|SPB6_HUMAN	1228200	1352900	1263900
sp|P35241|RADI_HUMAN	sp|P35241|RADI_HUMAN	543870	0	781690
sp|P35249|RFC4_HUMAN	sp|P35249|RFC4_HUMAN	409370	0	331920
sp|P35268|RL22_HUMAN	sp|P35268|RL22_HUMAN	13245000	10012000	9763400
sp|P35269|T2FA_HUMAN	sp|P35269|T2FA_HUMAN	339300	0	0
sp|P35270|SPRE_HUMAN	sp|P35270|SPRE_HUMAN	217000	544010	240920
sp|P35579|MYH9_HUMAN;sp|P35749|MYH11_HUMAN;sp|P35580|MYH10_HUMAN;REV__sp|Q9UKV3|ACINU_HUMAN	sp|P35579|MYH9_HUMAN	139690000	156850000	143890000
sp|P35606|COPB2_HUMAN	sp|P35606|COPB2_HUMAN	1006100	0	1656100
sp|P35613|BASI_HUMAN	sp|P35613|BASI_HUMAN	2131500	1655500	2073600
sp|P35637|FUS_HUMAN;sp|Q92804|RBP56_HUMAN	sp|P35637|FUS_HUMAN	6457300	6648200	5890600
sp|P35659|DEK_HUMAN	sp|P35659|DEK_HUMAN	1157400	725080	582570
sp|P35998|PRS7_HUMAN	sp|P35998|PRS7_HUMAN	1314300	1360700	905270
sp|P36542|ATPG_HUMAN	sp|P36542|ATPG_HUMAN	547180	410040	829640
sp|P36578|RL4_HUMAN	sp|P36578|RL4_HUMAN	6263700	7391600	6385300
sp|P36871|PGM1_HUMAN	sp|P36871|PGM1_HUMAN	0	463280	740520
sp|P36952|SPB5_HUMAN	sp|P36952|SPB5_HUMAN	1840600	2188800	1756900
sp|P36957|ODO2_HUMAN	sp|P36957|ODO2_HUMAN	3330600	2601700	2805100
sp|P37108|SRP14_HUMAN	sp|P37108|SRP14_HUMAN	2309000	2664800	2236700
sp|P37198|NUP62_HUMAN	sp|P37198|NUP62_HUMAN	545660	0	0
sp|P37802|TAGL2_HUMAN	sp|P37802|TAGL2_HUMAN	8852000	10034000	13594000
sp|P37837|TALDO_HUMAN	sp|P37837|TALDO_HUMAN	5184800	4308300	3826100
sp|P38117|ETFB_HUMAN	sp|P38117|ETFB_HUMAN	2540100	2107000	3024300
sp|P38159|RBMX_HUMAN;sp|Q96E39|RMXL1_HUMAN;sp|O75526|RMXL2_HUMAN;sp|Q8N7X1|RMXL3_HUMAN	sp|P38159|RBMX_HUMAN;sp|Q96E39|RMXL1_HUMAN	4443300	3532000	4790000
sp|P38606|VATA_HUMAN	sp|P38606|VATA_HUMAN	579650	620390	606140
sp|P38646|GRP75_HUMAN	sp|P38646|GRP75_HUMAN	17726000	18972000	15696000
sp|P38919|IF4A3_HUMAN	sp|P38919|IF4A3_HUMAN	2521500	1935400	2194300
sp|P39019|RS19_HUMAN	sp|P39019|RS19_HUMAN	8538400	6455100	9313100
sp|P39023|RL3_HUMAN	sp|P39023|RL3_HUMAN	3695300	4928200	4900100
sp|P39656|OST48_HUMAN	sp|P39656|OST48_HUMAN	2241300	1922300	1791700
sp|P39687|AN32A_HUMAN;sp|O95626|AN32D_HUMAN;sp|O43423|AN32C_HUMAN	sp|P39687|AN32A_HUMAN;sp|O95626|AN32D_HUMAN;sp|O43423|AN32C_HUMAN	5595000	6183700	3858400
sp|P39748|FEN1_HUMAN	sp|P39748|FEN1_HUMAN	4214100	2659500	3196800
sp|P40121|CAPG_HUMAN	sp|P40121|CAPG_HUMAN	3466500	2886900	3729000
sp|P40227|TCPZ_HUMAN	sp|P40227|TCPZ_HUMAN	17574000	16421000	15669000
sp|Q6NVV1|R13P3_HUMAN;sp|P40429|RL13A_HUMAN	sp|Q6NVV1|R13P3_HUMAN;sp|P40429|RL13A_HUMAN	6251000	6815500	5291500
sp|P40925|MDHC_HUMAN	sp|P40925|MDHC_HUMAN	6859400	6372200	6986800
sp|P40926|MDHM_HUMAN	sp|P40926|MDHM_HUMAN	5833900	8222700	6612200
sp|P41091|IF2G_HUMAN;sp|Q2VIR3|IF2GL_HUMAN	sp|P41091|IF2G_HUMAN;sp|Q2VIR3|IF2GL_HUMAN	7329500	7579900	5607500
sp|P41250|SYG_HUMAN	sp|P41250|SYG_HUMAN	1776000	1361300	1158000
sp|P41252|SYIC_HUMAN	sp|P41252|SYIC_HUMAN	2735700	2956100	3592800
sp|P41567|EIF1_HUMAN;sp|O60739|EIF1B_HUMAN	sp|P41567|EIF1_HUMAN;sp|O60739|EIF1B_HUMAN	1039500	1251800	1485100
sp|P42167|LAP2B_HUMAN;sp|P42166|LAP2A_HUMAN	sp|P42167|LAP2B_HUMAN;sp|P42166|LAP2A_HUMAN	1767200	1004200	1088000
sp|P42330|AK1C3_HUMAN;sp|P17516|AK1C4_HUMAN	sp|P42330|AK1C3_HUMAN;sp|P17516|AK1C4_HUMAN	405660	456040	742280
sp|P42677|RS27_HUMAN	sp|P42677|RS27_HUMAN	3823500	3330900	4158400
sp|P42704|LPPRC_HUMAN	sp|P42704|LPPRC_HUMAN	8067000	7455300	7751900
sp|P42766|RL35_HUMAN	sp|P42766|RL35_HUMAN	11343000	9651300	10546000
sp|P43034|LIS1_HUMAN	sp|P43034|LIS1_HUMAN	2417000	2287100	2350400
sp|P43243|MATR3_HUMAN	sp|P43243|MATR3_HUMAN	3801200	3183800	3449700
sp|P43487|RANG_HUMAN;sp|Q9C010|IPKB_HUMAN	sp|P43487|RANG_HUMAN	10029000	18820000	12216000
sp|P43490|NAMPT_HUMAN	sp|P43490|NAMPT_HUMAN	8375000	7527700	7996700
sp|P43686|PRS6B_HUMAN	sp|P43686|PRS6B_HUMAN	1946800	2262600	2458600
sp|P45880|VDAC2_HUMAN	sp|P45880|VDAC2_HUMAN	5144300	5712500	7360600
sp|P45974|UBP5_HUMAN	sp|P45974|UBP5_HUMAN	2531700	1831500	1828900
sp|P46060|RAGP1_HUMAN	sp|P46060|RAGP1_HUMAN	5071500	4243600	4098200
sp|P46087|NOP2_HUMAN	sp|P46087|NOP2_HUMAN	904820	0	671260
sp|P46776|RL27A_HUMAN	sp|P46776|RL27A_HUMAN	4722900	4634600	3542500
sp|P46777|RL5_HUMAN	sp|P46777|RL5_HUMAN	4575500	5384100	5069400
sp|P46778|RL21_HUMAN	sp|P46778|RL21_HUMAN	1337100	788020	537070
sp|P46779|RL28_HUMAN	sp|P46779|RL28_HUMAN	464300	628910	839340
sp|P46781|RS9_HUMAN	sp|P46781|RS9_HUMAN	13950000	12633000	12918000
sp|P46782|RS5_HUMAN	sp|P46782|RS5_HUMAN	3433500	3894300	3513000
sp|P46783|RS10_HUMAN;sp|Q9NQ39|RS10L_HUMAN	sp|P46783|RS10_HUMAN;sp|Q9NQ39|RS10L_HUMAN	6621200	6269700	4496500
sp|P46821|MAP1B_HUMAN	sp|P46821|MAP1B_HUMAN	1380300	898090	2463500
sp|P46926|GNPI1_HUMAN	sp|P46926|GNPI1_HUMAN	0	0	87529
sp|P46940|IQGA1_HUMAN;sp|Q86VI3|IQGA3_HUMAN	sp|P46940|IQGA1_HUMAN	10632000	10064000	9776600
sp|P47755|CAZA2_HUMAN	sp|P47755|CAZA2_HUMAN	715340	1217700	831830
sp|P47756|CAPZB_HUMAN	sp|P47756|CAPZB_HUMAN	2732600	2318900	2137000
sp|P47895|AL1A3_HUMAN;sp|O94788|AL1A2_HUMAN	sp|P47895|AL1A3_HUMAN	4111900	4384000	4010400
sp|P47897|SYQ_HUMAN	sp|P47897|SYQ_HUMAN	721840	546480	0
sp|P48047|ATPO_HUMAN	sp|P48047|ATPO_HUMAN	539330	0	514090
sp|P48357|LEPR_HUMAN	sp|P48357|LEPR_HUMAN	11295000	12281000	9324900
sp|P48444|COPD_HUMAN	sp|P48444|COPD_HUMAN	0	974830	1031800
sp|P48507|GSH0_HUMAN	sp|P48507|GSH0_HUMAN	1342700	981820	1256800
sp|P48556|PSMD8_HUMAN	sp|P48556|PSMD8_HUMAN	3334200	2921300	2713300
sp|P48637|GSHB_HUMAN	sp|P48637|GSHB_HUMAN	0	1050900	0
sp|P48643|TCPE_HUMAN	sp|P48643|TCPE_HUMAN	8925000	8481100	9272600
sp|P48739|PIPNB_HUMAN	sp|P48739|PIPNB_HUMAN	0	0	262600
sp|P49023|PAXI_HUMAN	sp|P49023|PAXI_HUMAN	0	0	322600
sp|P49207|RL34_HUMAN	sp|P49207|RL34_HUMAN	6609600	5649500	4224000
sp|P49257|LMAN1_HUMAN	sp|P49257|LMAN1_HUMAN	1436300	1197100	1072800
sp|P49321|NASP_HUMAN	sp|P49321|NASP_HUMAN	3379400	3738600	4286700
sp|P49327|FAS_HUMAN	sp|P49327|FAS_HUMAN	17214000	15683000	14100000
sp|P49368|TCPG_HUMAN	sp|P49368|TCPG_HUMAN	13101000	14876000	13112000
sp|P49411|EFTU_HUMAN	sp|P49411|EFTU_HUMAN	13123000	9726800	12432000
sp|P49588|SYAC_HUMAN	sp|P49588|SYAC_HUMAN	798090	0	1085400
sp|P49720|PSB3_HUMAN	sp|P49720|PSB3_HUMAN	559320	781110	430730
sp|P49721|PSB2_HUMAN	sp|P49721|PSB2_HUMAN	970390	706980	923240
sp|P49736|MCM2_HUMAN	sp|P49736|MCM2_HUMAN	1720400	1691400	1266200
sp|P49748|ACADV_HUMAN	sp|P49748|ACADV_HUMAN	1801300	1793200	1654200
sp|P49755|TMEDA_HUMAN	sp|P49755|TMEDA_HUMAN	1014100	1584600	1669300
sp|P49756|RBM25_HUMAN	sp|P49756|RBM25_HUMAN	0	0	477020
sp|P49915|GUAA_HUMAN	sp|P49915|GUAA_HUMAN	1762700	1820300	1817000
sp|P50213|IDH3A_HUMAN	sp|P50213|IDH3A_HUMAN	0	0	462660
sp|P50395|GDIB_HUMAN	sp|P50395|GDIB_HUMAN	8710900	8196000	8825100
sp|P50402|EMD_HUMAN	sp|P50402|EMD_HUMAN	728580	0	0
sp|P50454|SERPH_HUMAN	sp|P50454|SERPH_HUMAN	9241900	6738600	7313800
sp|P50502|F10A1_HUMAN;sp|Q8IZP2|ST134_HUMAN;sp|Q8NFI4|F10A5_HUMAN	sp|P50502|F10A1_HUMAN;sp|Q8IZP2|ST134_HUMAN;sp|Q8NFI4|F10A5_HUMAN	8755500	7735700	5714500
sp|P50570|DYN2_HUMAN	sp|P50570|DYN2_HUMAN	0	409890	0
sp|P50914|RL14_HUMAN	sp|P50914|RL14_HUMAN	3973400	3819700	3574000
sp|P50990|TCPQ_HUMAN	sp|P50990|TCPQ_HUMAN	11174000	11955000	11256000
sp|P50991|TCPD_HUMAN	sp|P50991|TCPD_HUMAN	12952000	12785000	10296000
sp|P50995|ANX11_HUMAN;sp|P27216|ANX13_HUMAN	sp|P50995|ANX11_HUMAN	6176700	5443800	5238100
sp|P51114|FXR1_HUMAN;sp|P51116|FXR2_HUMAN;sp|Q06787|FMR1_HUMAN	sp|P51114|FXR1_HUMAN	3477200	2410900	2780700
sp|P51148|RAB5C_HUMAN;sp|P61020|RAB5B_HUMAN;sp|P20339|RAB5A_HUMAN	sp|P51148|RAB5C_HUMAN	2935400	2302600	2380800
sp|P51149|RAB7A_HUMAN	sp|P51149|RAB7A_HUMAN	7525400	6189300	5052100
sp|P51553|IDH3G_HUMAN	sp|P51553|IDH3G_HUMAN	288840	0	0
sp|P51571|SSRD_HUMAN	sp|P51571|SSRD_HUMAN	595700	517150	679810
sp|P51572|BAP31_HUMAN	sp|P51572|BAP31_HUMAN	1356200	1157000	2153100
sp|P51659|DHB4_HUMAN	sp|P51659|DHB4_HUMAN	675870	544280	653070
sp|P51665|PSMD7_HUMAN	sp|P51665|PSMD7_HUMAN	0	1146000	499120
sp|P51857|AK1D1_HUMAN	sp|P51857|AK1D1_HUMAN	11936000	8849300	11256000
sp|P51858|HDGF_HUMAN	sp|P51858|HDGF_HUMAN	4392400	4536600	4692300
sp|P51991|ROA3_HUMAN	sp|P51991|ROA3_HUMAN	7607400	8072600	10142000
sp|P52209|6PGD_HUMAN	sp|P52209|6PGD_HUMAN	6620200	7442100	5919900
sp|P52272|HNRPM_HUMAN	sp|P52272|HNRPM_HUMAN	9944200	6258500	8600100
sp|P52292|IMA1_HUMAN	sp|P52292|IMA1_HUMAN	1889300	1340800	1345500
sp|P52565|GDIR1_HUMAN	sp|P52565|GDIR1_HUMAN	6509600	6965600	7195700
sp|P52566|GDIR2_HUMAN	sp|P52566|GDIR2_HUMAN	8440200	6831800	6936300
sp|P52597|HNRPF_HUMAN	sp|P52597|HNRPF_HUMAN	6094800	6628400	7305800
sp|P52788|SPSY_HUMAN	sp|P52788|SPSY_HUMAN	1386200	1067700	0
sp|P52815|RM12_HUMAN	sp|P52815|RM12_HUMAN	1487600	1085600	1212700
sp|P52895|AK1C2_HUMAN	sp|P52895|AK1C2_HUMAN	869470	671690	1010200
sp|P52907|CAZA1_HUMAN	sp|P52907|CAZA1_HUMAN	4771200	5572000	4397500
sp|P53041|PPP5_HUMAN	sp|P53041|PPP5_HUMAN	0	0	0
sp|P53367|ARFP1_HUMAN	sp|P53367|ARFP1_HUMAN	0	0	125130
sp|P53396|ACLY_HUMAN	sp|P53396|ACLY_HUMAN	1487700	779540	1986900
sp|P53618|COPB_HUMAN	sp|P53618|COPB_HUMAN	1400500	1262300	1518400
sp|P53621|COPA_HUMAN	sp|P53621|COPA_HUMAN	2184400	2348500	2457000
sp|P53680|AP2S1_HUMAN	sp|P53680|AP2S1_HUMAN	0	0	0
sp|P53985|MOT1_HUMAN	sp|P53985|MOT1_HUMAN	1268000	0	0
sp|P53999|TCP4_HUMAN	sp|P53999|TCP4_HUMAN	5116600	3571700	4321100
sp|P54136|SYRC_HUMAN	sp|P54136|SYRC_HUMAN	2435300	2365900	2881600
sp|P54577|SYYC_HUMAN	sp|P54577|SYYC_HUMAN	1885500	1396600	1487900
sp|P54578|UBP14_HUMAN	sp|P54578|UBP14_HUMAN	1244900	1554600	1268600
sp|P54727|RD23B_HUMAN	sp|P54727|RD23B_HUMAN	4189400	3279300	4549000
sp|P54819|KAD2_HUMAN	sp|P54819|KAD2_HUMAN	838580	608210	788770
sp|P54920|SNAA_HUMAN;sp|Q9H115|SNAB_HUMAN	sp|P54920|SNAA_HUMAN;sp|Q9H115|SNAB_HUMAN	0	890340	1004500
sp|P55010|IF5_HUMAN	sp|P55010|IF5_HUMAN	1916100	1500300	2234100
sp|P55036|PSMD4_HUMAN;sp|A2A3N6|PIPSL_HUMAN	sp|P55036|PSMD4_HUMAN;sp|A2A3N6|PIPSL_HUMAN	1653200	1249300	1109600
sp|P55060|XPO2_HUMAN	sp|P55060|XPO2_HUMAN	36397000	38531000	33398000
sp|P55072|TERA_HUMAN	sp|P55072|TERA_HUMAN	10374000	9694400	7176600
sp|P55084|ECHB_HUMAN	sp|P55084|ECHB_HUMAN	362940	0	0
sp|P55209|NP1L1_HUMAN	sp|P55209|NP1L1_HUMAN	9729000	11342000	8475900
sp|P55263|ADK_HUMAN	sp|P55263|ADK_HUMAN	2163800	2266700	1853000
sp|P55327|TPD52_HUMAN	sp|P55327|TPD52_HUMAN	2128600	2084700	1966600
sp|P55769|NH2L1_HUMAN	sp|P55769|NH2L1_HUMAN	818490	1131800	0
sp|Q6EEV6|SUMO4_HUMAN;sp|P61956|SUMO2_HUMAN;sp|P55854|SUMO3_HUMAN	sp|Q6EEV6|SUMO4_HUMAN;sp|P61956|SUMO2_HUMAN;sp|P55854|SUMO3_HUMAN	5151800	6112600	3836400
sp|P55884|EIF3B_HUMAN	sp|P55884|EIF3B_HUMAN	5768900	5679800	4732400
sp|P56385|ATP5I_HUMAN	sp|P56385|ATP5I_HUMAN	0	0	0
sp|P56537|IF6_HUMAN	sp|P56537|IF6_HUMAN	2620400	3283700	1691300
sp|P58107|EPIPL_HUMAN	sp|P58107|EPIPL_HUMAN	0	842790	707730
sp|P58546|MTPN_HUMAN	sp|P58546|MTPN_HUMAN	1424300	1604300	1658600
sp|P59998|ARPC4_HUMAN	sp|P59998|ARPC4_HUMAN	4712400	4097000	4152900
sp|P60174|TPIS_HUMAN	sp|P60174|TPIS_HUMAN	13181000	12685000	12403000
sp|P60228|EIF3E_HUMAN	sp|P60228|EIF3E_HUMAN	804880	1016000	672270
sp|P60660|MYL6_HUMAN;sp|P14649|MYL6B_HUMAN	sp|P60660|MYL6_HUMAN	26646000	22755000	23916000
sp|P63261|ACTG_HUMAN;sp|P60709|ACTB_HUMAN;sp|Q6S8J3|POTEE_HUMAN;sp|A5A3E0|POTEF_HUMAN;sp|P0CG38|POTEI_HUMAN;sp|Q562R1|ACTBL_HUMAN;sp|Q9BYX7|ACTBM_HUMAN;sp|P0CG39|POTEJ_HUMAN	sp|P63261|ACTG_HUMAN;sp|P60709|ACTB_HUMAN	560380000	578930000	638680000
sp|P60842|IF4A1_HUMAN;sp|Q14240|IF4A2_HUMAN	sp|P60842|IF4A1_HUMAN	30118000	31851000	28350000
sp|P60866|RS20_HUMAN	sp|P60866|RS20_HUMAN	18242000	17910000	16909000
sp|P60891|PRPS1_HUMAN;sp|P11908|PRPS2_HUMAN;sp|P21108|PRPS3_HUMAN	sp|P60891|PRPS1_HUMAN;sp|P11908|PRPS2_HUMAN;sp|P21108|PRPS3_HUMAN	363520	432040	674280
sp|P60900|PSA6_HUMAN	sp|P60900|PSA6_HUMAN	3190300	3232000	2915700
sp|P60903|S10AA_HUMAN	sp|P60903|S10AA_HUMAN	3369600	6763800	3737400
sp|P60981|DEST_HUMAN	sp|P60981|DEST_HUMAN	2638500	2539200	2642700
sp|P60983|GMFB_HUMAN	sp|P60983|GMFB_HUMAN	0	328570	0
sp|P61019|RAB2A_HUMAN;sp|Q8WUD1|RAB2B_HUMAN	sp|P61019|RAB2A_HUMAN;sp|Q8WUD1|RAB2B_HUMAN	1158900	0	893640
sp|P61026|RAB10_HUMAN	sp|P61026|RAB10_HUMAN	0	0	116260
sp|P61086|UBE2K_HUMAN	sp|P61086|UBE2K_HUMAN	2101300	2193200	1639600
sp|P61088|UBE2N_HUMAN;sp|Q5JXB2|UE2NL_HUMAN	sp|P61088|UBE2N_HUMAN;sp|Q5JXB2|UE2NL_HUMAN	0	1928300	1318900
sp|P61106|RAB14_HUMAN	sp|P61106|RAB14_HUMAN	450510	501520	471930
sp|P61158|ARP3_HUMAN	sp|P61158|ARP3_HUMAN	0	1969900	1391900
sp|P61160|ARP2_HUMAN	sp|P61160|ARP2_HUMAN	0	1117300	1280000
sp|P84077|ARF1_HUMAN;sp|P61204|ARF3_HUMAN	sp|P84077|ARF1_HUMAN;sp|P61204|ARF3_HUMAN	9395800	11722000	12049000
sp|P61221|ABCE1_HUMAN	sp|P61221|ABCE1_HUMAN	0	604190	479280
sp|P62834|RAP1A_HUMAN;sp|P61224|RAP1B_HUMAN;sp|A6NIZ1|RP1BL_HUMAN	sp|P62834|RAP1A_HUMAN;sp|P61224|RAP1B_HUMAN;sp|A6NIZ1|RP1BL_HUMAN	2879700	2678000	2120100
sp|P61247|RS3A_HUMAN	sp|P61247|RS3A_HUMAN	6326200	6085300	5302400
sp|Q9UNX3|RL26L_HUMAN;sp|P61254|RL26_HUMAN	sp|Q9UNX3|RL26L_HUMAN;sp|P61254|RL26_HUMAN	4816900	4614500	3382100
sp|P61289|PSME3_HUMAN	sp|P61289|PSME3_HUMAN	0	0	218790
sp|P61313|RL15_HUMAN	sp|P61313|RL15_HUMAN	3353400	2738800	4089200
sp|P61326|MGN_HUMAN;sp|Q96A72|MGN2_HUMAN	sp|P61326|MGN_HUMAN;sp|Q96A72|MGN2_HUMAN	1356600	1209400	847130
sp|P61353|RL27_HUMAN	sp|P61353|RL27_HUMAN	5637900	6655400	5867600
sp|P61604|CH10_HUMAN	sp|P61604|CH10_HUMAN	19917000	18445000	15632000
sp|P61619|S61A1_HUMAN;sp|Q9H9S3|S61A2_HUMAN	sp|P61619|S61A1_HUMAN;sp|Q9H9S3|S61A2_HUMAN	763750	612820	1110700
sp|P61758|PFD3_HUMAN	sp|P61758|PFD3_HUMAN	0	0	184920
sp|P61769|B2MG_HUMAN	sp|P61769|B2MG_HUMAN	926580	659720	938430
sp|P61803|DAD1_HUMAN	sp|P61803|DAD1_HUMAN	1349900	1484000	1295500
sp|P61923|COPZ1_HUMAN	sp|P61923|COPZ1_HUMAN	0	560760	327590
sp|P61960|UFM1_HUMAN	sp|P61960|UFM1_HUMAN	0	843780	516760
sp|P61978|HNRPK_HUMAN	sp|P61978|HNRPK_HUMAN	32565000	33336000	32522000
sp|P61981|1433G_HUMAN	sp|P61981|1433G_HUMAN	8451600	9932600	8567700
sp|P62081|RS7_HUMAN	sp|P62081|RS7_HUMAN	7716500	9739900	7147000
sp|P62136|PP1A_HUMAN	sp|P62136|PP1A_HUMAN	0	1188500	741460
sp|P62140|PP1B_HUMAN;sp|P36873|PP1G_HUMAN	sp|P62140|PP1B_HUMAN	0	1306200	1253100
sp|P62158|CALM_HUMAN	sp|P62158|CALM_HUMAN	14084000	15323000	19589000
sp|P62191|PRS4_HUMAN	sp|P62191|PRS4_HUMAN	1467300	1253400	1426200
sp|P62195|PRS8_HUMAN	sp|P62195|PRS8_HUMAN	1630800	823410	744990
sp|P62241|RS8_HUMAN	sp|P62241|RS8_HUMAN	19482000	16572000	17810000
sp|P62244|RS15A_HUMAN	sp|P62244|RS15A_HUMAN	0	5150500	3939600
sp|P62249|RS16_HUMAN	sp|P62249|RS16_HUMAN	16882000	15099000	13874000
sp|P62258|1433E_HUMAN	sp|P62258|1433E_HUMAN	53607000	65052000	60775000
sp|P62263|RS14_HUMAN	sp|P62263|RS14_HUMAN	6365800	8645400	9934400
sp|P62266|RS23_HUMAN	sp|P62266|RS23_HUMAN	341820	0	0
sp|P62269|RS18_HUMAN	sp|P62269|RS18_HUMAN	7627400	6425200	11730000
sp|P62277|RS13_HUMAN	sp|P62277|RS13_HUMAN	11758000	10980000	9987700
sp|P62280|RS11_HUMAN	sp|P62280|RS11_HUMAN	6854200	5470800	7009900
sp|P62304|RUXE_HUMAN	sp|P62304|RUXE_HUMAN	1049100	788990	973660
sp|P62306|RUXF_HUMAN	sp|P62306|RUXF_HUMAN	0	0	501430
sp|P62310|LSM3_HUMAN	sp|P62310|LSM3_HUMAN	0	0	403070
sp|P62314|SMD1_HUMAN	sp|P62314|SMD1_HUMAN	2975900	2713600	2626900
sp|P62316|SMD2_HUMAN	sp|P62316|SMD2_HUMAN	2391200	1796200	2836100
sp|P62318|SMD3_HUMAN	sp|P62318|SMD3_HUMAN	3774700	1961700	2376700
sp|P62328|TYB4_HUMAN	sp|P62328|TYB4_HUMAN	666670	1235500	5938100
sp|P62333|PRS10_HUMAN	sp|P62333|PRS10_HUMAN	1643100	1897600	1485100
sp|P62424|RL7A_HUMAN	sp|P62424|RL7A_HUMAN	12953000	10342000	11864000
sp|P62495|ERF1_HUMAN	sp|P62495|ERF1_HUMAN	762740	548090	1031500
sp|P62701|RS4X_HUMAN;sp|Q8TD47|RS4Y2_HUMAN;sp|P22090|RS4Y1_HUMAN	sp|P62701|RS4X_HUMAN;sp|Q8TD47|RS4Y2_HUMAN	10068000	14720000	13769000
sp|P67775|PP2AA_HUMAN;sp|P62714|PP2AB_HUMAN	sp|P67775|PP2AA_HUMAN;sp|P62714|PP2AB_HUMAN	0	650490	807680
sp|P63267|ACTH_HUMAN;sp|P68133|ACTS_HUMAN;sp|P68032|ACTC_HUMAN;sp|P62736|ACTA_HUMAN	sp|P63267|ACTH_HUMAN;sp|P68133|ACTS_HUMAN;sp|P68032|ACTC_HUMAN;sp|P62736|ACTA_HUMAN	1760200	3198000	6799700
sp|P62750|RL23A_HUMAN	sp|P62750|RL23A_HUMAN	11809000	10372000	13096000
sp|P62753|RS6_HUMAN	sp|P62753|RS6_HUMAN	6612200	6743600	6530600
sp|P62805|H4_HUMAN	sp|P62805|H4_HUMAN	236790000	227950000	107300000
sp|P62826|RAN_HUMAN	sp|P62826|RAN_HUMAN	20047000	21301000	17784000
sp|P62829|RL23_HUMAN	sp|P62829|RL23_HUMAN	2637800	2738900	5341200
sp|P62847|RS24_HUMAN	sp|P62847|RS24_HUMAN	899770	756600	1314300
sp|P62851|RS25_HUMAN	sp|P62851|RS25_HUMAN	11463000	10037000	10701000
sp|P62854|RS26_HUMAN;sp|Q5JNZ5|RS26L_HUMAN	sp|P62854|RS26_HUMAN;sp|Q5JNZ5|RS26L_HUMAN	5591600	5589800	5224700
sp|P62857|RS28_HUMAN	sp|P62857|RS28_HUMAN	2832400	4351100	3786500
sp|P62861|RS30_HUMAN	sp|P62861|RS30_HUMAN	2183300	2446300	2108200
sp|Q9HAV0|GBB4_HUMAN;sp|P62879|GBB2_HUMAN;sp|P62873|GBB1_HUMAN;sp|P16520|GBB3_HUMAN	sp|Q9HAV0|GBB4_HUMAN;sp|P62879|GBB2_HUMAN;sp|P62873|GBB1_HUMAN;sp|P16520|GBB3_HUMAN	1029100	552670	589210
sp|P62899|RL31_HUMAN	sp|P62899|RL31_HUMAN	4932000	3689800	4898200
sp|P62906|RL10A_HUMAN	sp|P62906|RL10A_HUMAN	6423700	7149800	8011600
sp|P62913|RL11_HUMAN	sp|P62913|RL11_HUMAN	9032300	7230200	8111300
sp|P62917|RL8_HUMAN	sp|P62917|RL8_HUMAN	3976100	3048100	6605300
sp|P62937|PPIA_HUMAN;sp|Q9Y536|PAL4A_HUMAN;sp|P0DN37|PAL4G_HUMAN;sp|P0DN26|PAL4F_HUMAN;sp|F5H284|PAL4D_HUMAN;sp|A0A0B4J2A2|PAL4C_HUMAN;sp|A0A075B759|PAL4E_HUMAN	sp|P62937|PPIA_HUMAN	51502000	61729000	49214000
sp|P62942|FKB1A_HUMAN	sp|P62942|FKB1A_HUMAN	3958600	4424700	3504100
sp|P62995|TRA2B_HUMAN	sp|P62995|TRA2B_HUMAN	620100	683250	723310
sp|P63010|AP2B1_HUMAN;sp|Q10567|AP1B1_HUMAN	sp|P63010|AP2B1_HUMAN;sp|Q10567|AP1B1_HUMAN	819250	558350	650840
sp|Q15836|VAMP3_HUMAN;sp|P63027|VAMP2_HUMAN	sp|Q15836|VAMP3_HUMAN;sp|P63027|VAMP2_HUMAN	771850	574930	669380
sp|P63104|1433Z_HUMAN	sp|P63104|1433Z_HUMAN	34232000	31052000	37607000
sp|P63165|SUMO1_HUMAN	sp|P63165|SUMO1_HUMAN	770200	0	661760
sp|P63173|RL38_HUMAN	sp|P63173|RL38_HUMAN	5236200	4868700	3988100
sp|P63208|SKP1_HUMAN	sp|P63208|SKP1_HUMAN	1492300	1666200	1146500
sp|P63220|RS21_HUMAN	sp|P63220|RS21_HUMAN	1841400	1971700	3185000
sp|P63241|IF5A1_HUMAN;sp|Q9GZV4|IF5A2_HUMAN;sp|Q6IS14|IF5AL_HUMAN	sp|P63241|IF5A1_HUMAN;sp|Q9GZV4|IF5A2_HUMAN;sp|Q6IS14|IF5AL_HUMAN	2294000	7548100	4809800
sp|P63244|GBLP_HUMAN	sp|P63244|GBLP_HUMAN	11125000	11921000	7698500
sp|P63313|TYB10_HUMAN	sp|P63313|TYB10_HUMAN	9062200	12447000	12689000
sp|P67809|YBOX1_HUMAN;sp|Q9Y2T7|YBOX2_HUMAN	sp|P67809|YBOX1_HUMAN;sp|Q9Y2T7|YBOX2_HUMAN	14565000	14122000	15869000
sp|P67936|TPM4_HUMAN	sp|P67936|TPM4_HUMAN	22187000	20068000	21788000
sp|P68036|UB2L3_HUMAN	sp|P68036|UB2L3_HUMAN	906540	652880	900120
sp|Q5VTE0|EF1A3_HUMAN;sp|P68104|EF1A1_HUMAN;sp|Q05639|EF1A2_HUMAN	sp|Q5VTE0|EF1A3_HUMAN;sp|P68104|EF1A1_HUMAN;sp|Q05639|EF1A2_HUMAN	348650000	355550000	356510000
sp|P68363|TBA1B_HUMAN;sp|Q71U36|TBA1A_HUMAN;sp|Q13748|TBA3C_HUMAN;sp|Q6PEY2|TBA3E_HUMAN;sp|Q9NY65|TBA8_HUMAN;sp|Q9H853|TBA4B_HUMAN	sp|P68363|TBA1B_HUMAN;sp|Q71U36|TBA1A_HUMAN;sp|Q13748|TBA3C_HUMAN;sp|Q6PEY2|TBA3E_HUMAN	172400000	181330000	153970000
sp|P68366|TBA4A_HUMAN	sp|P68366|TBA4A_HUMAN	9961300	10571000	8708500
sp|P68371|TBB4B_HUMAN;sp|P04350|TBB4A_HUMAN;sp|Q3ZCM7|TBB8_HUMAN	sp|P68371|TBB4B_HUMAN;sp|P04350|TBB4A_HUMAN	50284000	72373000	78139000
sp|P68400|CSK21_HUMAN;sp|Q8NEV1|CSK23_HUMAN	sp|P68400|CSK21_HUMAN;sp|Q8NEV1|CSK23_HUMAN	544990	552380	553790
sp|Q71DI3|H32_HUMAN;sp|Q16695|H31T_HUMAN;sp|P84243|H33_HUMAN;sp|P68431|H31_HUMAN;sp|Q6NXT2|H3C_HUMAN	sp|Q71DI3|H32_HUMAN;sp|Q16695|H31T_HUMAN;sp|P84243|H33_HUMAN;sp|P68431|H31_HUMAN;sp|Q6NXT2|H3C_HUMAN	99823000	72949000	109290000
sp|P78347|GTF2I_HUMAN	sp|P78347|GTF2I_HUMAN	1254600	0	964700
sp|P78371|TCPB_HUMAN	sp|P78371|TCPB_HUMAN	14579000	17701000	13612000
sp|P78395|PRAME_HUMAN	sp|P78395|PRAME_HUMAN	2178700	0	1370200
sp|P78417|GSTO1_HUMAN	sp|P78417|GSTO1_HUMAN	1190000	1692900	1447100
sp|P78527|PRKDC_HUMAN	sp|P78527|PRKDC_HUMAN	972670	737620	800080
sp|P80188|NGAL_HUMAN	sp|P80188|NGAL_HUMAN	1928800	2508600	2441500
sp|P81605|DCD_HUMAN	sp|P81605|DCD_HUMAN	4871500	3944700	3274800
sp|P82979|SARNP_HUMAN	sp|P82979|SARNP_HUMAN	907730	562720	1120000
sp|P83731|RL24_HUMAN	sp|P83731|RL24_HUMAN	0	0	0
sp|Q969Q0|RL36L_HUMAN;sp|P83881|RL36A_HUMAN	sp|Q969Q0|RL36L_HUMAN;sp|P83881|RL36A_HUMAN	356570	339900	408250
sp|P84085|ARF5_HUMAN	sp|P84085|ARF5_HUMAN	0	0	177900
sp|P84090|ERH_HUMAN	sp|P84090|ERH_HUMAN	4032300	2407900	2821000
sp|P84098|RL19_HUMAN	sp|P84098|RL19_HUMAN	0	0	288860
sp|P84103|SRSF3_HUMAN	sp|P84103|SRSF3_HUMAN	4075800	4690900	3845700
sp|Q00325|MPCP_HUMAN	sp|Q00325|MPCP_HUMAN	2729100	2706300	3184400
sp|Q00341|VIGLN_HUMAN	sp|Q00341|VIGLN_HUMAN	6074800	5189600	5646400
sp|Q00610|CLH1_HUMAN;sp|P53675|CLH2_HUMAN	sp|Q00610|CLH1_HUMAN	13370000	14408000	12675000
sp|Q00796|DHSO_HUMAN	sp|Q00796|DHSO_HUMAN	0	0	316150
sp|Q00839|HNRPU_HUMAN	sp|Q00839|HNRPU_HUMAN	20812000	16175000	19014000
sp|Q01082|SPTB2_HUMAN;sp|O15020|SPTN2_HUMAN	sp|Q01082|SPTB2_HUMAN	10751000	8909400	10987000
sp|Q01105|SET_HUMAN;sp|P0DME0|SETLP_HUMAN	sp|Q01105|SET_HUMAN;sp|P0DME0|SETLP_HUMAN	20540000	25334000	26467000
sp|Q01130|SRSF2_HUMAN;sp|Q9BRL6|SRSF8_HUMAN	sp|Q01130|SRSF2_HUMAN;sp|Q9BRL6|SRSF8_HUMAN	3201100	2776800	2446000
sp|Q01469|FABP5_HUMAN	sp|Q01469|FABP5_HUMAN	4329400	3280000	2790800
sp|Q01518|CAP1_HUMAN;sp|P40123|CAP2_HUMAN	sp|Q01518|CAP1_HUMAN	7681500	7254700	7452100
sp|Q01650|LAT1_HUMAN	sp|Q01650|LAT1_HUMAN	1681400	1847700	1844200
sp|Q01813|PFKAP_HUMAN	sp|Q01813|PFKAP_HUMAN	6789600	6300300	5687900
sp|Q02218|ODO1_HUMAN	sp|Q02218|ODO1_HUMAN	0	0	0
sp|Q02543|RL18A_HUMAN	sp|Q02543|RL18A_HUMAN	620200	0	475610
sp|Q02750|MP2K1_HUMAN;sp|P36507|MP2K2_HUMAN	sp|Q02750|MP2K1_HUMAN	2024700	2238000	1486700
sp|Q02790|FKBP4_HUMAN	sp|Q02790|FKBP4_HUMAN	8100800	8137100	7869000
sp|Q02878|RL6_HUMAN	sp|Q02878|RL6_HUMAN	21431000	18552000	24873000
sp|Q03135|CAV1_HUMAN	sp|Q03135|CAV1_HUMAN	1738900	1543100	2485400
sp|Q03181|PPARD_HUMAN	sp|Q03181|PPARD_HUMAN	10157000	7753800	13944000
sp|Q03252|LMNB2_HUMAN	sp|Q03252|LMNB2_HUMAN	575620	0	394810
sp|Q04637|IF4G1_HUMAN	sp|Q04637|IF4G1_HUMAN	9210900	12084000	9233900
sp|Q04760|LGUL_HUMAN	sp|Q04760|LGUL_HUMAN	0	0	263120
sp|Q04828|AK1C1_HUMAN	sp|Q04828|AK1C1_HUMAN	33189000	34293000	41706000
sp|Q04837|SSBP_HUMAN	sp|Q04837|SSBP_HUMAN	1398500	922720	1095800
sp|Q04917|1433F_HUMAN	sp|Q04917|1433F_HUMAN	4928500	4856600	4898700
sp|Q05519|SRS11_HUMAN	sp|Q05519|SRS11_HUMAN	0	0	0
sp|Q05682|CALD1_HUMAN	sp|Q05682|CALD1_HUMAN	1191500	1361900	869380
sp|Q06210|GFPT1_HUMAN	sp|Q06210|GFPT1_HUMAN	279770	328730	197860
sp|Q06323|PSME1_HUMAN	sp|Q06323|PSME1_HUMAN	5356900	5281300	4607200
sp|Q06830|PRDX1_HUMAN;sp|Q13162|PRDX4_HUMAN	sp|Q06830|PRDX1_HUMAN	69834000	75183000	64565000
sp|Q07020|RL18_HUMAN	sp|Q07020|RL18_HUMAN	10782000	10180000	8939500
sp|Q07021|C1QBP_HUMAN	sp|Q07021|C1QBP_HUMAN	3911700	3455000	2441100
sp|Q07065|CKAP4_HUMAN	sp|Q07065|CKAP4_HUMAN	8184000	7686100	7212400
sp|Q07866|KLC1_HUMAN	sp|Q07866|KLC1_HUMAN	0	0	142950
sp|Q07955|SRSF1_HUMAN	sp|Q07955|SRSF1_HUMAN	1778500	1689600	1581900
sp|Q07960|RHG01_HUMAN	sp|Q07960|RHG01_HUMAN	0	423630	361760
sp|Q08211|DHX9_HUMAN	sp|Q08211|DHX9_HUMAN	5351100	3497500	5050400
sp|Q08380|LG3BP_HUMAN	sp|Q08380|LG3BP_HUMAN	1201100	1250900	1163000
sp|Q08945|SSRP1_HUMAN	sp|Q08945|SSRP1_HUMAN	781630	630250	593460
sp|Q08J23|NSUN2_HUMAN	sp|Q08J23|NSUN2_HUMAN	794860	2248200	1352600
sp|Q09028|RBBP4_HUMAN;sp|Q16576|RBBP7_HUMAN	sp|Q09028|RBBP4_HUMAN	3786300	2708700	3389200
sp|Q09666|AHNK_HUMAN;sp|P48552|NRIP1_HUMAN	sp|Q09666|AHNK_HUMAN	76439000	60048000	67260000
sp|Q12792|TWF1_HUMAN	sp|Q12792|TWF1_HUMAN	611320	669550	937700
sp|Q12797|ASPH_HUMAN	sp|Q12797|ASPH_HUMAN	633390	0	556050
sp|Q12904|AIMP1_HUMAN	sp|Q12904|AIMP1_HUMAN	474700	0	487220
sp|Q12905|ILF2_HUMAN	sp|Q12905|ILF2_HUMAN	6646800	4841700	4373500
sp|Q12906|ILF3_HUMAN;sp|Q96SI9|STRBP_HUMAN	sp|Q12906|ILF3_HUMAN	7668000	5184500	6703900
sp|Q12931|TRAP1_HUMAN	sp|Q12931|TRAP1_HUMAN	6154600	3789600	4821300
sp|Q13011|ECH1_HUMAN	sp|Q13011|ECH1_HUMAN	306170	0	210810
sp|Q13045|FLII_HUMAN	sp|Q13045|FLII_HUMAN	0	698460	552920
sp|Q13098|CSN1_HUMAN	sp|Q13098|CSN1_HUMAN	0	0	236620
sp|Q13126|MTAP_HUMAN	sp|Q13126|MTAP_HUMAN	426610	503150	0
sp|Q13151|ROA0_HUMAN	sp|Q13151|ROA0_HUMAN	841870	1591400	1205800
sp|Q13177|PAK2_HUMAN;sp|Q13153|PAK1_HUMAN	sp|Q13177|PAK2_HUMAN	2784100	3184500	2908500
sp|Q13185|CBX3_HUMAN;sp|P83916|CBX1_HUMAN	sp|Q13185|CBX3_HUMAN	8021500	6407700	5351600
sp|Q13200|PSMD2_HUMAN	sp|Q13200|PSMD2_HUMAN	4060700	4050500	4946200
sp|Q13242|SRSF9_HUMAN	sp|Q13242|SRSF9_HUMAN	832140	1002900	736780
sp|Q13247|SRSF6_HUMAN;sp|Q08170|SRSF4_HUMAN	sp|Q13247|SRSF6_HUMAN;sp|Q08170|SRSF4_HUMAN	4606300	4711900	4171700
sp|Q13263|TIF1B_HUMAN	sp|Q13263|TIF1B_HUMAN	1984000	2690900	1822000
sp|Q13283|G3BP1_HUMAN	sp|Q13283|G3BP1_HUMAN	3472500	4278300	3185300
sp|Q13310|PABP4_HUMAN;sp|P0CB38|PAB4L_HUMAN	sp|Q13310|PABP4_HUMAN	1832200	1714200	1745000
sp|Q13347|EIF3I_HUMAN	sp|Q13347|EIF3I_HUMAN	2397000	1886200	2285900
sp|Q13404|UB2V1_HUMAN;sp|Q15819|UB2V2_HUMAN	sp|Q13404|UB2V1_HUMAN;sp|Q15819|UB2V2_HUMAN	294360000	260460000	216530000
sp|Q13409|DC1I2_HUMAN	sp|Q13409|DC1I2_HUMAN	4337800	3895500	3917800
sp|Q13428|TCOF_HUMAN	sp|Q13428|TCOF_HUMAN	665630	321500	312030
sp|Q13435|SF3B2_HUMAN	sp|Q13435|SF3B2_HUMAN	2755800	2260200	2290100
sp|Q13442|HAP28_HUMAN	sp|Q13442|HAP28_HUMAN	1606000	2653000	2292200
sp|Q13501|SQSTM_HUMAN	sp|Q13501|SQSTM_HUMAN	891240	606750	1572600
sp|Q13509|TBB3_HUMAN;sp|Q9H4B7|TBB1_HUMAN;CON__ENSEMBL:ENSBTAP00000025008	sp|Q13509|TBB3_HUMAN	2788300	2500600	2367400
sp|Q13547|HDAC1_HUMAN;sp|Q92769|HDAC2_HUMAN	sp|Q13547|HDAC1_HUMAN;sp|Q92769|HDAC2_HUMAN	0	0	697810
sp|Q13561|DCTN2_HUMAN	sp|Q13561|DCTN2_HUMAN	470450	631810	408700
sp|Q13618|CUL3_HUMAN	sp|Q13618|CUL3_HUMAN	0	297450	0
sp|Q13620|CUL4B_HUMAN	sp|Q13620|CUL4B_HUMAN	0	466060	0
sp|Q13740|CD166_HUMAN	sp|Q13740|CD166_HUMAN	417840	0	406090
sp|Q13813|SPTN1_HUMAN	sp|Q13813|SPTN1_HUMAN	24670000	22270000	21958000
sp|Q13838|DX39B_HUMAN	sp|Q13838|DX39B_HUMAN	10656000	8531800	7322200
sp|Q13867|BLMH_HUMAN	sp|Q13867|BLMH_HUMAN	390450	423360	0
sp|Q9BVA1|TBB2B_HUMAN;sp|Q13885|TBB2A_HUMAN	sp|Q9BVA1|TBB2B_HUMAN;sp|Q13885|TBB2A_HUMAN	3384000	2174400	1589900
sp|Q14019|COTL1_HUMAN	sp|Q14019|COTL1_HUMAN	13254000	10892000	12510000
sp|Q14103|HNRPD_HUMAN	sp|Q14103|HNRPD_HUMAN	4947200	3445100	4867800
sp|Q14152|EIF3A_HUMAN	sp|Q14152|EIF3A_HUMAN	835430	785710	835800
sp|Q14157|UBP2L_HUMAN	sp|Q14157|UBP2L_HUMAN	377860	0	176490
sp|Q14166|TTL12_HUMAN	sp|Q14166|TTL12_HUMAN	0	821760	0
sp|Q14204|DYHC1_HUMAN	sp|Q14204|DYHC1_HUMAN	44496000	50884000	55562000
sp|Q14247|SRC8_HUMAN	sp|Q14247|SRC8_HUMAN	9799400	9224500	11469000
sp|Q14257|RCN2_HUMAN	sp|Q14257|RCN2_HUMAN	0	0	0
sp|Q14258|TRI25_HUMAN	sp|Q14258|TRI25_HUMAN	1081600	1216900	1070300
sp|Q14315|FLNC_HUMAN	sp|Q14315|FLNC_HUMAN	1179300	1478700	7707200
sp|Q9Y247|FA50B_HUMAN;sp|Q14320|FA50A_HUMAN	sp|Q9Y247|FA50B_HUMAN;sp|Q14320|FA50A_HUMAN	0	0	451660
sp|Q14444|CAPR1_HUMAN	sp|Q14444|CAPR1_HUMAN	3483100	3256000	3205100
sp|Q14498|RBM39_HUMAN	sp|Q14498|RBM39_HUMAN	1243900	863720	793980
sp|Q14566|MCM6_HUMAN	sp|Q14566|MCM6_HUMAN	0	804940	0
sp|Q14697|GANAB_HUMAN	sp|Q14697|GANAB_HUMAN	7472800	8589700	7007800
sp|Q14739|LBR_HUMAN	sp|Q14739|LBR_HUMAN	1202500	887300	790240
sp|Q14764|MVP_HUMAN	sp|Q14764|MVP_HUMAN	3907500	3089100	3086500
sp|Q14847|LASP1_HUMAN	sp|Q14847|LASP1_HUMAN	2248000	1793800	3002200
sp|Q14914|PTGR1_HUMAN	sp|Q14914|PTGR1_HUMAN	0	1333600	1597000
sp|Q14974|IMB1_HUMAN	sp|Q14974|IMB1_HUMAN	1604200	2753100	4179600
sp|Q15008|PSMD6_HUMAN	sp|Q15008|PSMD6_HUMAN	0	1244500	1557100
sp|Q15019|SEPT2_HUMAN	sp|Q15019|SEPT2_HUMAN	1079100	554720	993560
sp|Q15021|CND1_HUMAN	sp|Q15021|CND1_HUMAN	0	391570	532450
sp|Q15029|U5S1_HUMAN	sp|Q15029|U5S1_HUMAN	0	0	1118600
sp|Q15046|SYK_HUMAN	sp|Q15046|SYK_HUMAN	0	1226300	0
sp|Q15056|IF4H_HUMAN	sp|Q15056|IF4H_HUMAN	7308100	7951700	6551300
sp|Q15084|PDIA6_HUMAN	sp|Q15084|PDIA6_HUMAN	4912000	3705000	4252200
sp|Q15102|PA1B3_HUMAN	sp|Q15102|PA1B3_HUMAN	0	0	310320
sp|Q15121|PEA15_HUMAN	sp|Q15121|PEA15_HUMAN	0	252120	0
sp|Q15149|PLEC_HUMAN;sp|Q9UPN3|MACF1_HUMAN	sp|Q15149|PLEC_HUMAN	49578000	48256000	49884000
sp|Q15181|IPYR_HUMAN	sp|Q15181|IPYR_HUMAN	11114000	12039000	11302000
sp|Q15185|TEBP_HUMAN	sp|Q15185|TEBP_HUMAN	3977500	3144100	0
sp|Q15233|NONO_HUMAN	sp|Q15233|NONO_HUMAN	2872200	3412100	4107000
sp|Q15257|PTPA_HUMAN	sp|Q15257|PTPA_HUMAN	0	0	511400
sp|Q15287|RNPS1_HUMAN	sp|Q15287|RNPS1_HUMAN	380820	0	0
sp|Q15293|RCN1_HUMAN	sp|Q15293|RCN1_HUMAN	7469900	7732600	6575000
sp|Q15365|PCBP1_HUMAN;sp|P57721|PCBP3_HUMAN	sp|Q15365|PCBP1_HUMAN	6392100	6394000	8488400
sp|Q15366|PCBP2_HUMAN	sp|Q15366|PCBP2_HUMAN	3618700	4311400	5504800
sp|Q15388|TOM20_HUMAN	sp|Q15388|TOM20_HUMAN	0	2054700	736320
sp|Q15393|SF3B3_HUMAN	sp|Q15393|SF3B3_HUMAN	1626100	1032100	1265000
sp|Q15417|CNN3_HUMAN;sp|Q99439|CNN2_HUMAN	sp|Q15417|CNN3_HUMAN;sp|Q99439|CNN2_HUMAN	2324000	2823100	2159400
sp|Q15424|SAFB1_HUMAN	sp|Q15424|SAFB1_HUMAN	0	402120	188250
sp|Q15437|SC23B_HUMAN	sp|Q15437|SC23B_HUMAN	0	0	0
sp|Q15459|SF3A1_HUMAN	sp|Q15459|SF3A1_HUMAN	1450700	1181200	1318400
sp|Q15631|TSN_HUMAN	sp|Q15631|TSN_HUMAN	598960	631130	845590
sp|Q15637|SF01_HUMAN	sp|Q15637|SF01_HUMAN	0	0	0
sp|Q15645|PCH2_HUMAN	sp|Q15645|PCH2_HUMAN	1798000	1523400	2127600
sp|Q15691|MARE1_HUMAN;sp|Q9UPY8|MARE3_HUMAN	sp|Q15691|MARE1_HUMAN	8206800	8446100	7189200
sp|Q15717|ELAV1_HUMAN	sp|Q15717|ELAV1_HUMAN	2100800	1858900	1883300
sp|Q15758|AAAT_HUMAN	sp|Q15758|AAAT_HUMAN	0	0	413890
sp|Q15785|TOM34_HUMAN	sp|Q15785|TOM34_HUMAN	2316100	2130300	2199100
sp|Q15843|NEDD8_HUMAN	sp|Q15843|NEDD8_HUMAN	1812000	1306200	1436900
sp|Q15907|RB11B_HUMAN;sp|P62491|RB11A_HUMAN;sp|P57735|RAB25_HUMAN	sp|Q15907|RB11B_HUMAN;sp|P62491|RB11A_HUMAN	9123800	7953700	8443800
sp|Q15942|ZYX_HUMAN	sp|Q15942|ZYX_HUMAN	1065900	1222500	688610
sp|Q16181|SEPT7_HUMAN	sp|Q16181|SEPT7_HUMAN	2843600	2703600	2072400
sp|Q16186|ADRM1_HUMAN	sp|Q16186|ADRM1_HUMAN	0	0	0
sp|Q16204|CCDC6_HUMAN	sp|Q16204|CCDC6_HUMAN	0	0	743730
sp|Q16531|DDB1_HUMAN	sp|Q16531|DDB1_HUMAN	1800000	1506600	3928800
sp|Q16543|CDC37_HUMAN	sp|Q16543|CDC37_HUMAN	1479100	1156200	1353500
sp|Q16555|DPYL2_HUMAN	sp|Q16555|DPYL2_HUMAN	0	0	512770
sp|Q16563|SYPL1_HUMAN	sp|Q16563|SYPL1_HUMAN	528830	574470	484440
sp|Q16629|SRSF7_HUMAN	sp|Q16629|SRSF7_HUMAN	1150200	1127800	1285500
sp|Q16643|DREB_HUMAN	sp|Q16643|DREB_HUMAN	2032200	1383000	2404100
sp|Q16658|FSCN1_HUMAN	sp|Q16658|FSCN1_HUMAN	9305300	14461000	10047000
sp|Q16719|KYNU_HUMAN	sp|Q16719|KYNU_HUMAN	1564900	1505300	2064700
sp|Q16763|UBE2S_HUMAN	sp|Q16763|UBE2S_HUMAN	352840	428790	0
sp|Q16799|RTN1_HUMAN	sp|Q16799|RTN1_HUMAN	0	0	425610
sp|Q16851|UGPA_HUMAN	sp|Q16851|UGPA_HUMAN	1532600	1012000	1278600
sp|Q16881|TRXR1_HUMAN	sp|Q16881|TRXR1_HUMAN	10348000	10399000	9631600
sp|Q16890|TPD53_HUMAN	sp|Q16890|TPD53_HUMAN	0	0	266450
sp|Q16891|MIC60_HUMAN	sp|Q16891|MIC60_HUMAN	3859800	3141900	3882200
sp|Q32MZ4|LRRF1_HUMAN	sp|Q32MZ4|LRRF1_HUMAN	2238300	1925500	2202600
sp|Q3ZCQ8|TIM50_HUMAN	sp|Q3ZCQ8|TIM50_HUMAN	294170	0	179690
sp|Q53GQ0|DHB12_HUMAN	sp|Q53GQ0|DHB12_HUMAN	544710	0	594220
sp|Q58FF6|H90B4_HUMAN	sp|Q58FF6|H90B4_HUMAN	0	601220	290670
sp|Q5RI15|COX20_HUMAN	sp|Q5RI15|COX20_HUMAN	410370	412370	432280
sp|Q9Y6H1|CHCH2_HUMAN;sp|Q5T1J5|CHCH9_HUMAN	sp|Q9Y6H1|CHCH2_HUMAN;sp|Q5T1J5|CHCH9_HUMAN	0	0	388230
sp|Q5T750|XP32_HUMAN	sp|Q5T750|XP32_HUMAN	0	0	754940
sp|Q5TZA2|CROCC_HUMAN	sp|Q5TZA2|CROCC_HUMAN	4700500	5214700	3699100
sp|Q5VW32|BROX_HUMAN	sp|Q5VW32|BROX_HUMAN	0	488980	0
sp|Q6DD88|ATLA3_HUMAN	sp|Q6DD88|ATLA3_HUMAN	0	0	566470
sp|Q6FI81|CPIN1_HUMAN	sp|Q6FI81|CPIN1_HUMAN	0	779160	0
sp|Q6IBS0|TWF2_HUMAN	sp|Q6IBS0|TWF2_HUMAN	3382900	3229300	3088600
sp|Q6NZI2|PTRF_HUMAN	sp|Q6NZI2|PTRF_HUMAN	2794800	2046400	2390600
sp|Q6P2Q9|PRP8_HUMAN	sp|Q6P2Q9|PRP8_HUMAN	303320	0	353060
sp|Q6PCB8|EMB_HUMAN	sp|Q6PCB8|EMB_HUMAN	2776700	0	0
sp|Q6PIU2|NCEH1_HUMAN	sp|Q6PIU2|NCEH1_HUMAN	559280	394720	646630
sp|Q6PKG0|LARP1_HUMAN	sp|Q6PKG0|LARP1_HUMAN	0	0	0
sp|Q6UW68|TM205_HUMAN	sp|Q6UW68|TM205_HUMAN	165300	0	0
sp|Q7KZF4|SND1_HUMAN	sp|Q7KZF4|SND1_HUMAN	8247300	6753400	6268000
sp|Q7L014|DDX46_HUMAN	sp|Q7L014|DDX46_HUMAN	707500	706470	691810
sp|Q7L1Q6|BZW1_HUMAN	sp|Q7L1Q6|BZW1_HUMAN	4767100	4313700	3148300
sp|Q7L2H7|EIF3M_HUMAN	sp|Q7L2H7|EIF3M_HUMAN	949820	717150	369870
sp|Q7L5D6|GET4_HUMAN	sp|Q7L5D6|GET4_HUMAN	0	0	289910
sp|Q7Z406|MYH14_HUMAN	sp|Q7Z406|MYH14_HUMAN	6545300	5950800	6364100
sp|Q86U42|PABP2_HUMAN	sp|Q86U42|PABP2_HUMAN	626210	367400	883880
sp|Q86UE4|LYRIC_HUMAN	sp|Q86UE4|LYRIC_HUMAN	0	0	0
sp|Q86V81|THOC4_HUMAN	sp|Q86V81|THOC4_HUMAN	3265900	2339900	2174800
sp|Q86VP6|CAND1_HUMAN	sp|Q86VP6|CAND1_HUMAN	2326500	2652900	2321200
sp|Q86X55|CARM1_HUMAN	sp|Q86X55|CARM1_HUMAN	289050	299060	0
sp|Q86Y56|DAAF5_HUMAN	sp|Q86Y56|DAAF5_HUMAN	3720400	1756100	2079000
sp|Q8IUE6|H2A2B_HUMAN	sp|Q8IUE6|H2A2B_HUMAN	1209400	0	981390
sp|Q8IUR6|CRERF_HUMAN	sp|Q8IUR6|CRERF_HUMAN	2435700	0	5423200
sp|Q8IVF2|AHNK2_HUMAN	sp|Q8IVF2|AHNK2_HUMAN	0	288200	436850
sp|Q8IYT4|KATL2_HUMAN	sp|Q8IYT4|KATL2_HUMAN	1373100	1247600	1274700
sp|Q8IZL8|PELP1_HUMAN	sp|Q8IZL8|PELP1_HUMAN	702740	486260	282780
sp|Q8N1F7|NUP93_HUMAN	sp|Q8N1F7|NUP93_HUMAN	494830	0	417400
sp|Q8N201|INT1_HUMAN	sp|Q8N201|INT1_HUMAN	0	0	726890
sp|Q8N3J2|METL4_HUMAN	sp|Q8N3J2|METL4_HUMAN	4503100	5563700	3064700
sp|Q8NBS9|TXND5_HUMAN	sp|Q8NBS9|TXND5_HUMAN	428340	396100	497830
sp|Q8NC51|PAIRB_HUMAN	sp|Q8NC51|PAIRB_HUMAN	4716200	4111200	5880800
sp|Q8NDC0|MISSL_HUMAN	sp|Q8NDC0|MISSL_HUMAN	421270	734240	733610
sp|Q8NE71|ABCF1_HUMAN	sp|Q8NE71|ABCF1_HUMAN	651670	834730	848530
sp|Q8NEB9|PK3C3_HUMAN	sp|Q8NEB9|PK3C3_HUMAN	0	0	192550
sp|Q8NFJ5|RAI3_HUMAN	sp|Q8NFJ5|RAI3_HUMAN	603840	551330	706340
sp|Q8TAT6|NPL4_HUMAN	sp|Q8TAT6|NPL4_HUMAN	0	0	406990
sp|Q8TDW7|FAT3_HUMAN	sp|Q8TDW7|FAT3_HUMAN	56593000	41892000	48510000
sp|Q8WUM4|PDC6I_HUMAN	sp|Q8WUM4|PDC6I_HUMAN	3078800	3732500	3315400
sp|Q8WW12|PCNP_HUMAN	sp|Q8WW12|PCNP_HUMAN	1169200	855070	1268600
sp|Q8WX93|PALLD_HUMAN	sp|Q8WX93|PALLD_HUMAN	528420	0	0
sp|Q8WXX5|DNJC9_HUMAN	sp|Q8WXX5|DNJC9_HUMAN	738740	554840	0
sp|Q92499|DDX1_HUMAN	sp|Q92499|DDX1_HUMAN	1211000	738790	2118400
sp|Q92520|FAM3C_HUMAN	sp|Q92520|FAM3C_HUMAN	0	0	0
sp|Q92522|H1X_HUMAN	sp|Q92522|H1X_HUMAN	519220	280890	0
sp|Q92598|HS105_HUMAN;sp|O95757|HS74L_HUMAN	sp|Q92598|HS105_HUMAN	8390500	7796800	7156600
sp|Q92616|GCN1L_HUMAN	sp|Q92616|GCN1L_HUMAN	0	421260	412990
sp|Q92688|AN32B_HUMAN	sp|Q92688|AN32B_HUMAN	850730	1078600	937610
sp|Q92734|TFG_HUMAN	sp|Q92734|TFG_HUMAN	4194400	4599600	4045400
sp|Q92841|DDX17_HUMAN	sp|Q92841|DDX17_HUMAN	1585000	1020000	1129300
sp|Q92945|FUBP2_HUMAN	sp|Q92945|FUBP2_HUMAN	2712500	2535900	2327400
sp|Q92973|TNPO1_HUMAN	sp|Q92973|TNPO1_HUMAN	1087100	1301100	1344300
sp|Q93045|STMN2_HUMAN	sp|Q93045|STMN2_HUMAN	0	0	509990
sp|Q969Z0|TBRG4_HUMAN	sp|Q969Z0|TBRG4_HUMAN	0	0	245380
sp|Q96A49|SYAP1_HUMAN	sp|Q96A49|SYAP1_HUMAN	0	606800	0
sp|Q96AE4|FUBP1_HUMAN	sp|Q96AE4|FUBP1_HUMAN	4484000	3949400	4296500
sp|Q96AG4|LRC59_HUMAN	sp|Q96AG4|LRC59_HUMAN	2548800	2717000	2089500
sp|Q96B36|AKTS1_HUMAN	sp|Q96B36|AKTS1_HUMAN	0	0	371210
sp|Q96B97|SH3K1_HUMAN	sp|Q96B97|SH3K1_HUMAN	745660	687610	624230
sp|Q96C19|EFHD2_HUMAN;sp|Q9BUP0|EFHD1_HUMAN	sp|Q96C19|EFHD2_HUMAN	8072000	10479000	8189200
sp|Q96C90|PP14B_HUMAN	sp|Q96C90|PP14B_HUMAN	0	0	508040
sp|Q96FQ6|S10AG_HUMAN	sp|Q96FQ6|S10AG_HUMAN	1973800	1604200	2229000
sp|Q96FW1|OTUB1_HUMAN	sp|Q96FW1|OTUB1_HUMAN	2305200	2472600	1378600
sp|Q96HC4|PDLI5_HUMAN	sp|Q96HC4|PDLI5_HUMAN	1260700	1609700	1491000
sp|Q96HE7|ERO1A_HUMAN	sp|Q96HE7|ERO1A_HUMAN	1535000	973710	883510
sp|Q96I24|FUBP3_HUMAN	sp|Q96I24|FUBP3_HUMAN	652730	501350	633630
sp|Q96I99|SUCB2_HUMAN	sp|Q96I99|SUCB2_HUMAN	0	0	334660
sp|Q96IX5|USMG5_HUMAN	sp|Q96IX5|USMG5_HUMAN	837630	642230	596960
sp|Q96K17|BT3L4_HUMAN	sp|Q96K17|BT3L4_HUMAN	568320	782310	504460
sp|Q96KP4|CNDP2_HUMAN	sp|Q96KP4|CNDP2_HUMAN	1442100	1617400	1248900
sp|Q96N66|MBOA7_HUMAN	sp|Q96N66|MBOA7_HUMAN	1468900	911790	1460100
sp|Q96PK6|RBM14_HUMAN	sp|Q96PK6|RBM14_HUMAN	711130	637530	586860
sp|Q96QK1|VPS35_HUMAN	sp|Q96QK1|VPS35_HUMAN	1666700	1727400	1439500
sp|Q96RP9|EFGM_HUMAN	sp|Q96RP9|EFGM_HUMAN	353070	392420	0
sp|Q96TA1|NIBL1_HUMAN	sp|Q96TA1|NIBL1_HUMAN	2018900	2090100	1827200
sp|Q99460|PSMD1_HUMAN	sp|Q99460|PSMD1_HUMAN	3424100	3566900	3498000
sp|Q99471|PFD5_HUMAN	sp|Q99471|PFD5_HUMAN	0	661370	573450
sp|Q99497|PARK7_HUMAN	sp|Q99497|PARK7_HUMAN	6303700	5191500	5348900
sp|Q99536|VAT1_HUMAN	sp|Q99536|VAT1_HUMAN	2785400	2762000	2143700
sp|Q99584|S10AD_HUMAN	sp|Q99584|S10AD_HUMAN	686910	597170	1001200
sp|Q99614|TTC1_HUMAN	sp|Q99614|TTC1_HUMAN	667420	0	0
sp|Q99623|PHB2_HUMAN	sp|Q99623|PHB2_HUMAN	6507800	5643000	6256300
sp|Q99714|HCD2_HUMAN	sp|Q99714|HCD2_HUMAN	3686500	2733800	3234300
sp|Q99729|ROAA_HUMAN	sp|Q99729|ROAA_HUMAN	86562	0	279090
sp|Q99733|NP1L4_HUMAN	sp|Q99733|NP1L4_HUMAN	0	701590	621430
sp|Q99798|ACON_HUMAN	sp|Q99798|ACON_HUMAN	0	526590	0
sp|Q99832|TCPH_HUMAN	sp|Q99832|TCPH_HUMAN	5860200	7352500	6957800
sp|Q99848|EBP2_HUMAN	sp|Q99848|EBP2_HUMAN	0	0	640980
sp|Q99873|ANM1_HUMAN;sp|Q9NR22|ANM8_HUMAN	sp|Q99873|ANM1_HUMAN	6914200	5684700	5006500
sp|Q9BQE3|TBA1C_HUMAN	sp|Q9BQE3|TBA1C_HUMAN	1572500	1400500	926500
sp|Q9BRA2|TXD17_HUMAN	sp|Q9BRA2|TXD17_HUMAN	1364800	702920	928340
sp|Q9BRF8|CPPED_HUMAN	sp|Q9BRF8|CPPED_HUMAN	651670	0	533530
sp|Q9BS26|ERP44_HUMAN	sp|Q9BS26|ERP44_HUMAN	0	0	351490
sp|Q9BUL8|PDC10_HUMAN	sp|Q9BUL8|PDC10_HUMAN	0	0	288670
sp|Q9BVC6|TM109_HUMAN	sp|Q9BVC6|TM109_HUMAN	1595000	1264900	1407900
sp|Q9BVK6|TMED9_HUMAN	sp|Q9BVK6|TMED9_HUMAN	1038500	901170	946310
sp|Q9BW27|NUP85_HUMAN	sp|Q9BW27|NUP85_HUMAN	0	0	149010
sp|Q9BXJ9|NAA15_HUMAN	sp|Q9BXJ9|NAA15_HUMAN	0	376700	655240
sp|Q9BXP5|SRRT_HUMAN	sp|Q9BXP5|SRRT_HUMAN	718060	0	0
sp|Q9BZE1|RM37_HUMAN	sp|Q9BZE1|RM37_HUMAN	0	0	255170
sp|Q9BZK7|TBL1R_HUMAN	sp|Q9BZK7|TBL1R_HUMAN	0	0	897980
sp|Q9BZZ5|API5_HUMAN	sp|Q9BZZ5|API5_HUMAN	1174000	1313000	1227200
sp|Q9C005|DPY30_HUMAN	sp|Q9C005|DPY30_HUMAN	927770	0	0
sp|Q9C0B1|FTO_HUMAN	sp|Q9C0B1|FTO_HUMAN	1407300	0	782200
sp|Q9C0D9|EPT1_HUMAN	sp|Q9C0D9|EPT1_HUMAN	0	0	0
sp|Q9GZT3|SLIRP_HUMAN	sp|Q9GZT3|SLIRP_HUMAN	1178800	1267800	1225000
sp|Q9H074|PAIP1_HUMAN	sp|Q9H074|PAIP1_HUMAN	0	670100	0
sp|Q9H078|CLPB_HUMAN	sp|Q9H078|CLPB_HUMAN	48081000	34327000	36042000
sp|Q9H098|F107B_HUMAN	sp|Q9H098|F107B_HUMAN	225030	0	256270
sp|Q9H0C8|ILKAP_HUMAN	sp|Q9H0C8|ILKAP_HUMAN	0	0	140860
sp|Q9H0U4|RAB1B_HUMAN;sp|P62820|RAB1A_HUMAN;sp|Q92928|RAB1C_HUMAN;sp|P51153|RAB13_HUMAN;sp|Q92930|RAB8B_HUMAN;sp|P61006|RAB8A_HUMAN;sp|P59190|RAB15_HUMAN	sp|Q9H0U4|RAB1B_HUMAN;sp|P62820|RAB1A_HUMAN	8285000	9258400	8454400
sp|Q9H223|EHD4_HUMAN	sp|Q9H223|EHD4_HUMAN	0	0	447760
sp|Q9H299|SH3L3_HUMAN	sp|Q9H299|SH3L3_HUMAN	0	637310	785410
sp|Q9H2G4|TSYL2_HUMAN	sp|Q9H2G4|TSYL2_HUMAN	4272300	3634100	2669200
sp|Q9H3K6|BOLA2_HUMAN	sp|Q9H3K6|BOLA2_HUMAN	2354900	1952200	1839400
sp|Q9H3N1|TMX1_HUMAN	sp|Q9H3N1|TMX1_HUMAN	669960	416580	682070
sp|Q9H444|CHM4B_HUMAN	sp|Q9H444|CHM4B_HUMAN	1051600	1570600	1333800
sp|Q9H4A6|GOLP3_HUMAN	sp|Q9H4A6|GOLP3_HUMAN	384660	0	427340
sp|Q9H4M9|EHD1_HUMAN;sp|Q9NZN3|EHD3_HUMAN;sp|Q9NZN4|EHD2_HUMAN	sp|Q9H4M9|EHD1_HUMAN;sp|Q9NZN3|EHD3_HUMAN	1219000	715690	1188100
sp|Q9H773|DCTP1_HUMAN	sp|Q9H773|DCTP1_HUMAN	0	0	925130
sp|Q9H910|HN1L_HUMAN	sp|Q9H910|HN1L_HUMAN	3382000	3350700	2761800
sp|Q9HAV7|GRPE1_HUMAN	sp|Q9HAV7|GRPE1_HUMAN	315760	0	384590
sp|Q9HB71|CYBP_HUMAN	sp|Q9HB71|CYBP_HUMAN	2303800	2496600	1853100
sp|Q9HC38|GLOD4_HUMAN	sp|Q9HC38|GLOD4_HUMAN	734840	0	667010
sp|Q9HCY8|S10AE_HUMAN	sp|Q9HCY8|S10AE_HUMAN	2563900	2681300	2212200
sp|Q9HDC9|APMAP_HUMAN	sp|Q9HDC9|APMAP_HUMAN	3026800	2119600	2291600
sp|Q9NP92|RT30_HUMAN	sp|Q9NP92|RT30_HUMAN	550680	0	0
sp|Q9NP97|DLRB1_HUMAN;sp|Q8TF09|DLRB2_HUMAN	sp|Q9NP97|DLRB1_HUMAN;sp|Q8TF09|DLRB2_HUMAN	2412900	2483500	2608900
sp|Q9NPJ3|ACO13_HUMAN	sp|Q9NPJ3|ACO13_HUMAN	589580	0	0
sp|Q9NQC3|RTN4_HUMAN	sp|Q9NQC3|RTN4_HUMAN	7098800	4846200	6283000
sp|Q9NQR4|NIT2_HUMAN	sp|Q9NQR4|NIT2_HUMAN	0	328970	340780
sp|Q9NR30|DDX21_HUMAN;sp|Q9BQ39|DDX50_HUMAN	sp|Q9NR30|DDX21_HUMAN	6181800	4385500	5164500
sp|Q9NR31|SAR1A_HUMAN	sp|Q9NR31|SAR1A_HUMAN	1420400	0	1140800
sp|Q9NRV9|HEBP1_HUMAN	sp|Q9NRV9|HEBP1_HUMAN	2227400	2539900	3543500
sp|Q9NS69|TOM22_HUMAN	sp|Q9NS69|TOM22_HUMAN	0	1016400	1240700
sp|Q9NSD9|SYFB_HUMAN	sp|Q9NSD9|SYFB_HUMAN	3214200	2749600	2274100
sp|Q9NSE4|SYIM_HUMAN	sp|Q9NSE4|SYIM_HUMAN	628590	0	517280
sp|Q9NTJ3|SMC4_HUMAN	sp|Q9NTJ3|SMC4_HUMAN	0	1342100	956200
sp|Q9NTK5|OLA1_HUMAN	sp|Q9NTK5|OLA1_HUMAN	7742900	7784200	8566300
sp|Q9NTZ6|RBM12_HUMAN	sp|Q9NTZ6|RBM12_HUMAN	0	0	0
sp|Q9NUQ9|FA49B_HUMAN	sp|Q9NUQ9|FA49B_HUMAN	0	0	226670
sp|Q9NUU7|DD19A_HUMAN;sp|Q9UMR2|DD19B_HUMAN	sp|Q9NUU7|DD19A_HUMAN;sp|Q9UMR2|DD19B_HUMAN	507890	0	0
sp|Q9NVA2|SEP11_HUMAN	sp|Q9NVA2|SEP11_HUMAN	0	0	372780
sp|Q9NVP1|DDX18_HUMAN	sp|Q9NVP1|DDX18_HUMAN	522070	0	340660
sp|Q9NWH9|SLTM_HUMAN	sp|Q9NWH9|SLTM_HUMAN	660860	0	0
sp|Q9NX63|MIC19_HUMAN	sp|Q9NX63|MIC19_HUMAN	1375100	906080	1035200
sp|Q9NY33|DPP3_HUMAN	sp|Q9NY33|DPP3_HUMAN	1175400	1172100	1203300
sp|Q9NYL9|TMOD3_HUMAN	sp|Q9NYL9|TMOD3_HUMAN	1111000	1139700	867240
sp|Q9NZ01|TECR_HUMAN	sp|Q9NZ01|TECR_HUMAN	1137600	1185700	0
sp|Q9NZM1|MYOF_HUMAN	sp|Q9NZM1|MYOF_HUMAN	766950	0	530470
sp|Q9P035|HACD3_HUMAN	sp|Q9P035|HACD3_HUMAN	776400	813870	643640
sp|Q9P258|RCC2_HUMAN	sp|Q9P258|RCC2_HUMAN	927770	805330	778600
sp|Q9P2E9|RRBP1_HUMAN	sp|Q9P2E9|RRBP1_HUMAN	1185200	1088200	1043500
sp|Q9P2J5|SYLC_HUMAN	sp|Q9P2J5|SYLC_HUMAN	0	1085200	788600
sp|Q9UBB4|ATX10_HUMAN	sp|Q9UBB4|ATX10_HUMAN	0	0	427940
sp|Q9UBI6|GBG12_HUMAN	sp|Q9UBI6|GBG12_HUMAN	1108300	0	0
sp|Q9UBQ0|VPS29_HUMAN	sp|Q9UBQ0|VPS29_HUMAN	0	694730	941180
sp|Q9UBQ5|EIF3K_HUMAN	sp|Q9UBQ5|EIF3K_HUMAN	290070	0	170980
sp|Q9UBQ7|GRHPR_HUMAN	sp|Q9UBQ7|GRHPR_HUMAN	0	397560	198800
sp|Q9UDW1|QCR9_HUMAN	sp|Q9UDW1|QCR9_HUMAN	375380	568070	772870
sp|Q9UGI8|TES_HUMAN	sp|Q9UGI8|TES_HUMAN	623670	625370	913700
sp|Q9UHB6|LIMA1_HUMAN	sp|Q9UHB6|LIMA1_HUMAN	567590	0	0
sp|Q9UHB9|SRP68_HUMAN	sp|Q9UHB9|SRP68_HUMAN	0	0	149510
sp|Q9UHD1|CHRD1_HUMAN	sp|Q9UHD1|CHRD1_HUMAN	0	0	478060
sp|Q9UHD8|SEPT9_HUMAN	sp|Q9UHD8|SEPT9_HUMAN	0	0	899290
sp|Q9UHD9|UBQL2_HUMAN	sp|Q9UHD9|UBQL2_HUMAN	273060	336360	277750
sp|Q9UHV9|PFD2_HUMAN	sp|Q9UHV9|PFD2_HUMAN	1771000	1819700	1396300
sp|Q9UHX1|PUF60_HUMAN	sp|Q9UHX1|PUF60_HUMAN	1733100	1450400	1668300
sp|Q9UI30|TR112_HUMAN	sp|Q9UI30|TR112_HUMAN	652810	0	828360
sp|Q9UK76|HN1_HUMAN	sp|Q9UK76|HN1_HUMAN	2011300	2287400	2254400
sp|Q9UKK9|NUDT5_HUMAN	sp|Q9UKK9|NUDT5_HUMAN	538970	0	537070
sp|Q9UKM9|RALY_HUMAN	sp|Q9UKM9|RALY_HUMAN	1142600	721910	836200
sp|Q9UKY7|CDV3_HUMAN	sp|Q9UKY7|CDV3_HUMAN	0	1701000	1606000
sp|Q9UL46|PSME2_HUMAN	sp|Q9UL46|PSME2_HUMAN	2639600	2358200	2029200
sp|Q9ULZ3|ASC_HUMAN	sp|Q9ULZ3|ASC_HUMAN	0	262720	0
sp|Q9UMS4|PRP19_HUMAN	sp|Q9UMS4|PRP19_HUMAN	4616100	3531900	3034600
sp|Q9UMX0|UBQL1_HUMAN;sp|Q9NRR5|UBQL4_HUMAN	sp|Q9UMX0|UBQL1_HUMAN;sp|Q9NRR5|UBQL4_HUMAN	2727600	2564500	2500500
sp|Q9UMY4|SNX12_HUMAN	sp|Q9UMY4|SNX12_HUMAN	0	0	199170
sp|Q9UNF0|PACN2_HUMAN	sp|Q9UNF0|PACN2_HUMAN	834590	934950	726510
sp|Q9UNL2|SSRG_HUMAN	sp|Q9UNL2|SSRG_HUMAN	0	0	254080
sp|Q9UNM6|PSD13_HUMAN	sp|Q9UNM6|PSD13_HUMAN	1325500	1483500	1283400
sp|Q9UNZ2|NSF1C_HUMAN	sp|Q9UNZ2|NSF1C_HUMAN	3121900	3466400	2469800
sp|Q9UQ35|SRRM2_HUMAN	sp|Q9UQ35|SRRM2_HUMAN	553900	0	579820
sp|Q9UQ80|PA2G4_HUMAN	sp|Q9UQ80|PA2G4_HUMAN	7359600	6567800	6012300
sp|Q9Y224|CN166_HUMAN	sp|Q9Y224|CN166_HUMAN	509690	678600	419540
sp|Q9Y230|RUVB2_HUMAN	sp|Q9Y230|RUVB2_HUMAN	8910200	7767100	7155800
sp|Q9Y262|EIF3L_HUMAN	sp|Q9Y262|EIF3L_HUMAN	1155600	1332800	1145600
sp|Q9Y265|RUVB1_HUMAN	sp|Q9Y265|RUVB1_HUMAN	7601600	9646600	9125600
sp|Q9Y266|NUDC_HUMAN	sp|Q9Y266|NUDC_HUMAN	4624300	4207400	5238400
sp|Q9Y277|VDAC3_HUMAN	sp|Q9Y277|VDAC3_HUMAN	306350	894580	438310
sp|Q9Y285|SYFA_HUMAN	sp|Q9Y285|SYFA_HUMAN	0	0	246990
sp|Q9Y2A7|NCKP1_HUMAN	sp|Q9Y2A7|NCKP1_HUMAN	0	0	199010
sp|Q9Y2Q3|GSTK1_HUMAN	sp|Q9Y2Q3|GSTK1_HUMAN	432810	302470	351560
sp|Q9Y2S6|TMA7_HUMAN	sp|Q9Y2S6|TMA7_HUMAN	0	230480	577140
sp|Q9Y2T3|GUAD_HUMAN	sp|Q9Y2T3|GUAD_HUMAN	683120	914590	632690
sp|Q9Y2W1|TR150_HUMAN	sp|Q9Y2W1|TR150_HUMAN	717100	594660	441050
sp|Q9Y2X3|NOP58_HUMAN	sp|Q9Y2X3|NOP58_HUMAN	0	0	152300
sp|Q9Y333|LSM2_HUMAN	sp|Q9Y333|LSM2_HUMAN	0	957490	553030
sp|Q9Y383|LC7L2_HUMAN;sp|Q9NQ29|LUC7L_HUMAN	sp|Q9Y383|LC7L2_HUMAN	2267400	2137400	2111600
sp|Q9Y3D6|FIS1_HUMAN	sp|Q9Y3D6|FIS1_HUMAN	0	0	420920
sp|Q9Y3F4|STRAP_HUMAN	sp|Q9Y3F4|STRAP_HUMAN	4585500	4090400	4089300
sp|Q9Y3I0|RTCB_HUMAN	sp|Q9Y3I0|RTCB_HUMAN	2056500	1714300	1696600
sp|Q9Y3U8|RL36_HUMAN	sp|Q9Y3U8|RL36_HUMAN	0	1027400	1713800
sp|Q9Y490|TLN1_HUMAN;sp|Q9Y4G6|TLN2_HUMAN	sp|Q9Y490|TLN1_HUMAN	0	0	458000
sp|Q9Y4Y9|LSM5_HUMAN	sp|Q9Y4Y9|LSM5_HUMAN	713800	799980	516410
sp|Q9Y5B9|SP16H_HUMAN	sp|Q9Y5B9|SP16H_HUMAN	828280	1085600	970110
sp|Q9Y5L4|TIM13_HUMAN	sp|Q9Y5L4|TIM13_HUMAN	563730	329890	0
sp|Q9Y5M8|SRPRB_HUMAN	sp|Q9Y5M8|SRPRB_HUMAN	0	0	192210
sp|Q9Y5S9|RBM8A_HUMAN	sp|Q9Y5S9|RBM8A_HUMAN	1171600	961400	1009300
sp|Q9Y5X3|SNX5_HUMAN	sp|Q9Y5X3|SNX5_HUMAN	200550	0	225270
sp|Q9Y617|SERC_HUMAN	sp|Q9Y617|SERC_HUMAN	2915200	1402300	1766400
sp|Q9Y678|COPG1_HUMAN	sp|Q9Y678|COPG1_HUMAN	0	354710	0
sp|Q9Y696|CLIC4_HUMAN	sp|Q9Y696|CLIC4_HUMAN	1540900	0	0
sp|Q9Y6B6|SAR1B_HUMAN	sp|Q9Y6B6|SAR1B_HUMAN	229260	0	284000
sp|Q9Y6C9|MTCH2_HUMAN	sp|Q9Y6C9|MTCH2_HUMAN	0	750960	0
sp|Q9Y6E2|BZW2_HUMAN	sp|Q9Y6E2|BZW2_HUMAN	1878100	1657700	1727200
sp|Q9Y6N5|SQRD_HUMAN	sp|Q9Y6N5|SQRD_HUMAN	1258200	1005400	883140

## Sheet: PC9_1 cell
libDIA-Protein Groups IDs												libDIA-Protein Groups IDs												dirDIA-Protein Groups IDs
Source	PG.ProteinGroups	PG.ProteinAccessions	PG.Genes	PG.ProteinDescriptions	PG.UniProtIds	PG.ProteinNames	[4] 20201027_PC9-MF-1cell-Eclipse-DIA-01.raw.PG.Quantity	[5] 20201027_PC9-MF-1cell-Eclipse-DIA-02.raw.PG.Quantity	[6] 20201027_PC9-MF-1cell-Eclipse-DIA-03.raw.PG.Quantity			Source	PG.ProteinGroups	PG.ProteinAccessions	PG.Genes	PG.ProteinDescriptions	PG.UniProtIds	PG.ProteinNames	[4] 20201027_PC9-MF-1cell-Eclipse-DIA-01.raw.PG.Quantity	[5] 20201027_PC9-MF-1cell-Eclipse-DIA-02.raw.PG.Quantity	[6] 20201027_PC9-MF-1cell-Eclipse-DIA-03.raw.PG.Quantity			Source	PG.ProteinGroups	PG.ProteinAccessions	PG.Genes	PG.ProteinDescriptions	PG.UniProtIds	PG.ProteinNames	[4] 20201027_PC9-MF-1cell-Eclipse-DIA-01.raw.PG.Quantity	[5] 20201027_PC9-MF-1cell-Eclipse-DIA-02.raw.PG.Quantity	[6] 20201027_PC9-MF-1cell-Eclipse-DIA-03.raw.PG.Quantity
libDIA-22xlib	A0FGR8	A0FGR8	ESYT2	Extended synaptotagmin-2	A0FGR8	ESYT2_HUMAN	Filtered	Filtered	Filtered			libDIA-6xlib	A0FGR8	A0FGR8	ESYT2	Extended synaptotagmin-2	A0FGR8	ESYT2_HUMAN	Filtered	Filtered	Filtered			dirDIA	A1L4H1	A1L4H1	SSC5D	Soluble scavenger receptor cysteine-rich domain-containing protein SSC5D	A1L4H1	SRCRL_HUMAN	11595.6	12519.4	39552.6
libDIA-22xlib	A1L4H1	A1L4H1	SSC5D	Soluble scavenger receptor cysteine-rich domain-containing protein SSC5D	A1L4H1	SRCRL_HUMAN	11595.7	12519.6	39552.6			libDIA-6xlib	A1L4H1	A1L4H1	SSC5D	Soluble scavenger receptor cysteine-rich domain-containing protein SSC5D	A1L4H1	SRCRL_HUMAN	11595.7	12559.4	39552.6			dirDIA	A6NC97	A6NC97	FAM172BP	Putative protein FAM172B	A6NC97	F172B_HUMAN	649.647	Filtered	2721.77
libDIA-22xlib	A5A3E0	A5A3E0	POTEF	POTE ankyrin domain family member F	A5A3E0	POTEF_HUMAN	Filtered	93423.5	128009			libDIA-6xlib	A5YKK6	A5YKK6	CNOT1	CCR4-NOT transcription complex subunit 1	A5YKK6	CNOT1_HUMAN	Filtered	Filtered	Filtered			dirDIA	E9PAV3;Q13765	E9PAV3;Q13765	NACA	Nascent polypeptide-associated complex subunit alpha, muscle-specific form;Nascent polypeptide-associated complex subunit alpha	E9PAV3;Q13765	NACAM_HUMAN;NACA_HUMAN	900.15	1674.83	1792.59
libDIA-22xlib	A6NCS4	A6NCS4	NKX2-6	Homeobox protein Nkx-2.6	A6NCS4	NKX26_HUMAN	795475	901070	1.016e+06			libDIA-6xlib	A6NC97	A6NC97	FAM172BP	Putative protein FAM172B	A6NC97	F172B_HUMAN	Filtered	938.184	2112.3			dirDIA	O00151	O00151	PDLIM1	PDZ and LIM domain protein 1	O00151	PDLI1_HUMAN	Filtered	3129.14	3211.03
libDIA-22xlib	A6NKT7;P0DJD0;P0DJD1;P49792;Q7Z3J3	A6NKT7;P0DJD0;P0DJD1;P49792;Q7Z3J3	RGPD3;RGPD1;RGPD2;RANBP2;RGPD4	RanBP2-like and GRIP domain-containing protein 3;RANBP2-like and GRIP domain-containing protein 1;RANBP2-like and GRIP domain-containing protein 2;E3 SUMO-protein ligase RanBP2;RanBP2-like and GRIP domain-containing protein 4	A6NKT7;P0DJD0;P0DJD1;P49792;Q7Z3J3	RGPD3_HUMAN;RGPD1_HUMAN;RGPD2_HUMAN;RBP2_HUMAN;RGPD4_HUMAN	Filtered	Filtered	Filtered			libDIA-6xlib	A6NCE7;Q9GZQ8;Q9H492	A6NCE7;Q9GZQ8;Q9H492	MAP1LC3B2;MAP1LC3B;MAP1LC3A	Microtubule-associated proteins 1A/1B light chain 3 beta 2;Microtubule-associated proteins 1A/1B light chain 3B;Microtubule-associated proteins 1A/1B light chain 3A	A6NCE7;Q9GZQ8;Q9H492	MP3B2_HUMAN;MLP3B_HUMAN;MLP3A_HUMAN	Filtered	Filtered	Filtered			dirDIA	O00231	O00231	PSMD11	26S proteasome non-ATPase regulatory subunit 11	O00231	PSD11_HUMAN	170.066	144.782	1200.09
libDIA-22xlib	A8MWD9;P62308	A8MWD9;P62308	SNRPGP15;SNRPG	Putative small nuclear ribonucleoprotein G-like protein 15;Small nuclear ribonucleoprotein G	A8MWD9;P62308	RUXGL_HUMAN;RUXG_HUMAN	Filtered	Filtered	Filtered			libDIA-6xlib	A6NKT7;P0DJD0;P0DJD1;P49792;Q7Z3J3	A6NKT7;P0DJD0;P0DJD1;P49792;Q7Z3J3	RGPD3;RGPD1;RGPD2;RANBP2;RGPD4	RanBP2-like and GRIP domain-containing protein 3;RANBP2-like and GRIP domain-containing protein 1;RANBP2-like and GRIP domain-containing protein 2;E3 SUMO-protein ligase RanBP2;RanBP2-like and GRIP domain-containing protein 4	A6NKT7;P0DJD0;P0DJD1;P49792;Q7Z3J3	RGPD3_HUMAN;RGPD1_HUMAN;RGPD2_HUMAN;RBP2_HUMAN;RGPD4_HUMAN	Filtered	Filtered	Filtered			dirDIA	O00232	O00232	PSMD12	26S proteasome non-ATPase regulatory subunit 12	O00232	PSD12_HUMAN	Filtered	Filtered	Filtered
libDIA-22xlib	B5ME19;Q99613	B5ME19;Q99613	EIF3CL;EIF3C	Eukaryotic translation initiation factor 3 subunit C-like protein;Eukaryotic translation initiation factor 3 subunit C	B5ME19;Q99613	EIFCL_HUMAN;EIF3C_HUMAN	2216.86	3291.72	3688.45			libDIA-6xlib	A8MWD9;P62308	A8MWD9;P62308	SNRPGP15;SNRPG	Putative small nuclear ribonucleoprotein G-like protein 15;Small nuclear ribonucleoprotein G	A8MWD9;P62308	RUXGL_HUMAN;RUXG_HUMAN	Filtered	Filtered	Filtered			dirDIA	O00244	O00244	ATOX1	Copper transport protein ATOX1	O00244	ATOX1_HUMAN	3629.27	5054.63	3715.89
libDIA-22xlib	E9PAV3;Q13765	E9PAV3;Q13765	NACA	Nascent polypeptide-associated complex subunit alpha, muscle-specific form;Nascent polypeptide-associated complex subunit alpha	E9PAV3;Q13765	NACAM_HUMAN;NACA_HUMAN	556.416	2179.42	1809.66			libDIA-6xlib	B5ME19;Q99613	B5ME19;Q99613	EIF3CL;EIF3C	Eukaryotic translation initiation factor 3 subunit C-like protein;Eukaryotic translation initiation factor 3 subunit C	B5ME19;Q99613	EIFCL_HUMAN;EIF3C_HUMAN	Filtered	Filtered	Filtered			dirDIA	O00264	O00264	PGRMC1	Membrane-associated progesterone receptor component 1	O00264	PGRC1_HUMAN	7370.32	6601.04	2766.81
libDIA-22xlib	E9PRG8	E9PRG8	C11orf98	Uncharacterized protein C11orf98	E9PRG8	CK098_HUMAN	Filtered	Filtered	Filtered			libDIA-6xlib	E9PAV3;Q13765	E9PAV3;Q13765	NACA	Nascent polypeptide-associated complex subunit alpha, muscle-specific form;Nascent polypeptide-associated complex subunit alpha	E9PAV3;Q13765	NACAM_HUMAN;NACA_HUMAN	1032.34	2758.12	2531.57			dirDIA	O00299	O00299	CLIC1	Chloride intracellular channel protein 1	O00299	CLIC1_HUMAN	9052.86	10988.8	8619.09
libDIA-22xlib	O00116	O00116	AGPS	Alkyldihydroxyacetonephosphate synthase, peroxisomal	O00116	ADAS_HUMAN	Filtered	Filtered	Filtered			libDIA-6xlib	O00116	O00116	AGPS	Alkyldihydroxyacetonephosphate synthase, peroxisomal	O00116	ADAS_HUMAN	Filtered	Filtered	Filtered			dirDIA	O00303	O00303	EIF3F	Eukaryotic translation initiation factor 3 subunit F	O00303	EIF3F_HUMAN	460.836	1031.49	4291.56
libDIA-22xlib	O00148	O00148	DDX39A	ATP-dependent RNA helicase DDX39A	O00148	DX39A_HUMAN	10139.4	11562.7	11443			libDIA-6xlib	O00148	O00148	DDX39A	ATP-dependent RNA helicase DDX39A	O00148	DX39A_HUMAN	10410.1	11916	11953.8			dirDIA	O00410	O00410	IPO5	Importin-5	O00410	IPO5_HUMAN	Filtered	Filtered	1229.36
libDIA-22xlib	O00151	O00151	PDLIM1	PDZ and LIM domain protein 1	O00151	PDLI1_HUMAN	Filtered	3129.14	3203.96			libDIA-6xlib	O00151	O00151	PDLIM1	PDZ and LIM domain protein 1	O00151	PDLI1_HUMAN	2258.57	3129.13	3211.03			dirDIA	O00425;Q9NZI8;Q9Y6M1	O00425;Q9NZI8;Q9Y6M1	IGF2BP3;IGF2BP1;IGF2BP2	Insulin-like growth factor 2 mRNA-binding protein 3;Insulin-like growth factor 2 mRNA-binding protein 1;Insulin-like growth factor 2 mRNA-binding protein 2	O00425;Q9NZI8;Q9Y6M1	IF2B3_HUMAN;IF2B1_HUMAN;IF2B2_HUMAN	Filtered	496.418	Filtered
libDIA-22xlib	O00154	O00154	ACOT7	Cytosolic acyl coenzyme A thioester hydrolase	O00154	BACH_HUMAN	Filtered	Filtered	Filtered			libDIA-6xlib	O00154	O00154	ACOT7	Cytosolic acyl coenzyme A thioester hydrolase	O00154	BACH_HUMAN	Filtered	Filtered	Filtered			dirDIA	O00429	O00429	DNM1L	Dynamin-1-like protein	O00429	DNM1L_HUMAN	Filtered	1794.67	1810.33
libDIA-22xlib	O00159	O00159	MYO1C	Unconventional myosin-Ic	O00159	MYO1C_HUMAN	Filtered	Filtered	Filtered			libDIA-6xlib	O00159	O00159	MYO1C	Unconventional myosin-Ic	O00159	MYO1C_HUMAN	Filtered	Filtered	Filtered			dirDIA	O00487	O00487	PSMD14	26S proteasome non-ATPase regulatory subunit 14	O00487	PSDE_HUMAN	1643.82	2318.81	1360.13
libDIA-22xlib	O00170	O00170	AIP	AH receptor-interacting protein	O00170	AIP_HUMAN	Filtered	Filtered	Filtered			libDIA-6xlib	O00170	O00170	AIP	AH receptor-interacting protein	O00170	AIP_HUMAN	Filtered	Filtered	Filtered			dirDIA	O00571;O15523	O00571;O15523	DDX3X;DDX3Y	ATP-dependent RNA helicase DDX3X;ATP-dependent RNA helicase DDX3Y	O00571;O15523	DDX3X_HUMAN;DDX3Y_HUMAN	5539.4	4001.16	3287.82
libDIA-22xlib	O00231	O00231	PSMD11	26S proteasome non-ATPase regulatory subunit 11	O00231	PSD11_HUMAN	0.783211	Filtered	0.474541			libDIA-6xlib	O00203	O00203	AP3B1	AP-3 complex subunit beta-1	O00203	AP3B1_HUMAN	Filtered	Filtered	Filtered			dirDIA	O00625	O00625	PIR	Pirin	O00625	PIR_HUMAN	1031.14	729.807	1024.78
libDIA-22xlib	O00232	O00232	PSMD12	26S proteasome non-ATPase regulatory subunit 12	O00232	PSD12_HUMAN	4938.48	5893.05	6369.84			libDIA-6xlib	O00231	O00231	PSMD11	26S proteasome non-ATPase regulatory subunit 11	O00231	PSD11_HUMAN	170.036	148.269	925.714			dirDIA	O14684	O14684	PTGES	Prostaglandin E synthase	O14684	PTGES_HUMAN	7183.82	7576.53	3850.3
libDIA-22xlib	O00233	O00233	PSMD9	26S proteasome non-ATPase regulatory subunit 9	O00233	PSMD9_HUMAN	Filtered	1626.88	1435.43			libDIA-6xlib	O00232	O00232	PSMD12	26S proteasome non-ATPase regulatory subunit 12	O00232	PSD12_HUMAN	4998.23	5893.04	4925.17			dirDIA	O14737	O14737	PDCD5	Programmed cell death protein 5	O14737	PDCD5_HUMAN	Filtered	1872.79	1715.83
libDIA-22xlib	O00244	O00244	ATOX1	Copper transport protein ATOX1	O00244	ATOX1_HUMAN	Filtered	5317.99	3814.71			libDIA-6xlib	O00233	O00233	PSMD9	26S proteasome non-ATPase regulatory subunit 9	O00233	PSMD9_HUMAN	Filtered	Filtered	2352.79			dirDIA	O14818	O14818	PSMA7	Proteasome subunit alpha type-7	O14818	PSA7_HUMAN	4937.61	6866.59	6455.62
libDIA-22xlib	O00264	O00264	PGRMC1	Membrane-associated progesterone receptor component 1	O00264	PGRC1_HUMAN	3954.4	3117.41	2816.16			libDIA-6xlib	O00244	O00244	ATOX1	Copper transport protein ATOX1	O00244	ATOX1_HUMAN	3273.57	5318.07	3813.36			dirDIA	O14929	O14929	HAT1	Histone acetyltransferase type B catalytic subunit	O14929	HAT1_HUMAN	0.465363	554.16	548.612
libDIA-22xlib	O00299	O00299	CLIC1	Chloride intracellular channel protein 1	O00299	CLIC1_HUMAN	13073.6	10993.2	8619.07			libDIA-6xlib	O00264	O00264	PGRMC1	Membrane-associated progesterone receptor component 1	O00264	PGRC1_HUMAN	2412.78	3117.5	2807.33			dirDIA	O14950;P19105	O14950;P19105	MYL12B;MYL12A	Myosin regulatory light chain 12B;Myosin regulatory light chain 12A	O14950;P19105	ML12B_HUMAN;ML12A_HUMAN	5741.8	8667.73	8142.81
libDIA-22xlib	O00303	O00303	EIF3F	Eukaryotic translation initiation factor 3 subunit F	O00303	EIF3F_HUMAN	Filtered	1837.45	2115.72			libDIA-6xlib	O00267	O00267	SUPT5H	Transcription elongation factor SPT5	O00267	SPT5H_HUMAN	Filtered	Filtered	Filtered			dirDIA	O14980	O14980	XPO1	Exportin-1	O14980	XPO1_HUMAN	199.18	Filtered	553.517
libDIA-22xlib	O00410	O00410	IPO5	Importin-5	O00410	IPO5_HUMAN	Filtered	Filtered	591.178			libDIA-6xlib	O00299	O00299	CLIC1	Chloride intracellular channel protein 1	O00299	CLIC1_HUMAN	13073.6	10972.3	8619.05			dirDIA	O14983;P16615	O14983;P16615	ATP2A1;ATP2A2	Sarcoplasmic/endoplasmic reticulum calcium ATPase 1;Sarcoplasmic/endoplasmic reticulum calcium ATPase 2	O14983;P16615	AT2A1_HUMAN;AT2A2_HUMAN	Filtered	0.454399	Filtered
libDIA-22xlib	O00425	O00425	IGF2BP3	Insulin-like growth factor 2 mRNA-binding protein 3	O00425	IF2B3_HUMAN	Filtered	Filtered	Filtered			libDIA-6xlib	O00303	O00303	EIF3F	Eukaryotic translation initiation factor 3 subunit F	O00303	EIF3F_HUMAN	0.622673	971.865	2364.79			dirDIA	O15143	O15143	ARPC1B	Actin-related protein 2/3 complex subunit 1B	O15143	ARC1B_HUMAN	1279.13	1457.74	952.023
libDIA-22xlib	O00429	O00429	DNM1L	Dynamin-1-like protein	O00429	DNM1L_HUMAN	1821.42	2767.07	2576.34			libDIA-6xlib	O00410	O00410	IPO5	Importin-5	O00410	IPO5_HUMAN	Filtered	Filtered	Filtered			dirDIA	O15144	O15144	ARPC2	Actin-related protein 2/3 complex subunit 2	O15144	ARPC2_HUMAN	1768.6	2532.09	2138.77
libDIA-22xlib	O00483	O00483	NDUFA4	Cytochrome c oxidase subunit NDUFA4	O00483	NDUA4_HUMAN	Filtered	Filtered	Filtered			libDIA-6xlib	O00425	O00425	IGF2BP3	Insulin-like growth factor 2 mRNA-binding protein 3	O00425	IF2B3_HUMAN	Filtered	Filtered	Filtered			dirDIA	O15145	O15145	ARPC3	Actin-related protein 2/3 complex subunit 3	O15145	ARPC3_HUMAN	4807.06	5248.97	3628.4
libDIA-22xlib	O00487	O00487	PSMD14	26S proteasome non-ATPase regulatory subunit 14	O00487	PSDE_HUMAN	1523.26	2300.38	2429.09			libDIA-6xlib	O00429	O00429	DNM1L	Dynamin-1-like protein	O00429	DNM1L_HUMAN	1285.62	Filtered	1812.83			dirDIA	O15347	O15347	HMGB3	High mobility group protein B3	O15347	HMGB3_HUMAN	1244.49	1160.01	2041.44
libDIA-22xlib	O00499	O00499	BIN1	Myc box-dependent-interacting protein 1	O00499	BIN1_HUMAN	Filtered	1336.27	Filtered			libDIA-6xlib	O00469	O00469	PLOD2	Procollagen-lysine,2-oxoglutarate 5-dioxygenase 2	O00469	PLOD2_HUMAN	Filtered	Filtered	Filtered			dirDIA	O15355	O15355	PPM1G	Protein phosphatase 1G	O15355	PPM1G_HUMAN	Filtered	221.011	Filtered
libDIA-22xlib	O00515	O00515	LAD1	Ladinin-1	O00515	LAD1_HUMAN	Filtered	Filtered	Filtered			libDIA-6xlib	O00483	O00483	NDUFA4	Cytochrome c oxidase subunit NDUFA4	O00483	NDUA4_HUMAN	Filtered	Filtered	Filtered			dirDIA	O15371	O15371	EIF3D	Eukaryotic translation initiation factor 3 subunit D	O15371	EIF3D_HUMAN	1996.92	3225.7	3420.09
libDIA-22xlib	O00567	O00567	NOP56	Nucleolar protein 56	O00567	NOP56_HUMAN	Filtered	Filtered	Filtered			libDIA-6xlib	O00487	O00487	PSMD14	26S proteasome non-ATPase regulatory subunit 14	O00487	PSDE_HUMAN	2759.61	2898.04	2279.51			dirDIA	O15511	O15511	ARPC5	Actin-related protein 2/3 complex subunit 5	O15511	ARPC5_HUMAN	7890.76	6651.99	5272.4
libDIA-22xlib	O00571	O00571	DDX3X	ATP-dependent RNA helicase DDX3X	O00571	DDX3X_HUMAN	2257.6	3395.99	3990.54			libDIA-6xlib	O00499	O00499	BIN1	Myc box-dependent-interacting protein 1	O00499	BIN1_HUMAN	Filtered	1336.25	Filtered			dirDIA	O43143	O43143	DHX15	Pre-mRNA-splicing factor ATP-dependent RNA helicase DHX15	O43143	DHX15_HUMAN	0.920506	292.689	1250.19
libDIA-22xlib	O00592	O00592	PODXL	Podocalyxin	O00592	PODXL_HUMAN	2148.51	2093.03	2275.73			libDIA-6xlib	O00505	O00505	KPNA3	Importin subunit alpha-4	O00505	IMA4_HUMAN	Filtered	Filtered	Filtered			dirDIA	O43175	O43175	PHGDH	D-3-phosphoglycerate dehydrogenase	O43175	SERA_HUMAN	1803.39	2265.51	4350.22
libDIA-22xlib	O00625	O00625	PIR	Pirin	O00625	PIR_HUMAN	960.297	729.812	1024.86			libDIA-6xlib	O00567	O00567	NOP56	Nucleolar protein 56	O00567	NOP56_HUMAN	1.4556	140.399	Filtered			dirDIA	O43242	O43242	PSMD3	26S proteasome non-ATPase regulatory subunit 3	O43242	PSMD3_HUMAN	385.676	837.494	1884.63
libDIA-22xlib	O00629	O00629	KPNA4	Importin subunit alpha-3	O00629	IMA3_HUMAN	0.477654	Filtered	Filtered			libDIA-6xlib	O00571	O00571	DDX3X	ATP-dependent RNA helicase DDX3X	O00571	DDX3X_HUMAN	3386.07	3390.93	4238.07			dirDIA	O43324	O43324	EEF1E1	Eukaryotic translation elongation factor 1 epsilon-1	O43324	MCA3_HUMAN	Filtered	Filtered	0.513313
libDIA-22xlib	O14548	O14548	COX7A2L	Cytochrome c oxidase subunit 7A-related protein, mitochondrial	O14548	COX7R_HUMAN	Filtered	Filtered	Filtered			libDIA-6xlib	O00592	O00592	PODXL	Podocalyxin	O00592	PODXL_HUMAN	Filtered	Filtered	Filtered			dirDIA	O43390	O43390	HNRNPR	Heterogeneous nuclear ribonucleoprotein R	O43390	HNRPR_HUMAN	0.436867	Filtered	174.09
libDIA-22xlib	O14579	O14579	COPE	Coatomer subunit epsilon	O14579	COPE_HUMAN	Filtered	1899.83	1713.1			libDIA-6xlib	O00625	O00625	PIR	Pirin	O00625	PIR_HUMAN	1232.03	729.802	432.39			dirDIA	O43399	O43399	TPD52L2	Tumor protein D54	O43399	TPD54_HUMAN	2667.12	3031.17	3466.58
libDIA-22xlib	O14602;P47813	O14602;P47813	EIF1AY;EIF1AX	Eukaryotic translation initiation factor 1A, Y-chromosomal;Eukaryotic translation initiation factor 1A, X-chromosomal	O14602;P47813	IF1AY_HUMAN;IF1AX_HUMAN	2371.73	6362.88	Filtered			libDIA-6xlib	O00629	O00629	KPNA4	Importin subunit alpha-3	O00629	IMA3_HUMAN	350.065	Filtered	Filtered			dirDIA	O43583	O43583	DENR	Density-regulated protein	O43583	DENR_HUMAN	883.958	2723.36	970.455
libDIA-22xlib	O14646	O14646	CHD1	Chromodomain-helicase-DNA-binding protein 1	O14646	CHD1_HUMAN	Filtered	3945.43	Filtered			libDIA-6xlib	O14548	O14548	COX7A2L	Cytochrome c oxidase subunit 7A-related protein, mitochondrial	O14548	COX7R_HUMAN	Filtered	Filtered	Filtered			dirDIA	O43670	O43670	ZNF207	BUB3-interacting and GLEBS motif-containing protein ZNF207	O43670	ZN207_HUMAN	363.941	1765.3	1704.26
libDIA-22xlib	O14672	O14672	ADAM10	Disintegrin and metalloproteinase domain-containing protein 10	O14672	ADA10_HUMAN	Filtered	Filtered	Filtered			libDIA-6xlib	O14579	O14579	COPE	Coatomer subunit epsilon	O14579	COPE_HUMAN	Filtered	1899.89	1703.07			dirDIA	O43684	O43684	BUB3	Mitotic checkpoint protein BUB3	O43684	BUB3_HUMAN	1719.95	264.114	5193.76
libDIA-22xlib	O14684	O14684	PTGES	Prostaglandin E synthase	O14684	PTGES_HUMAN	7536.96	7570.9	4136.16			libDIA-6xlib	O14602;P47813	O14602;P47813	EIF1AY;EIF1AX	Eukaryotic translation initiation factor 1A, Y-chromosomal;Eukaryotic translation initiation factor 1A, X-chromosomal	O14602;P47813	IF1AY_HUMAN;IF1AX_HUMAN	Filtered	Filtered	Filtered			dirDIA	O43707	O43707	ACTN4	Alpha-actinin-4	O43707	ACTN4_HUMAN	12630.5	21494.2	22084.6
libDIA-22xlib	O14737	O14737	PDCD5	Programmed cell death protein 5	O14737	PDCD5_HUMAN	Filtered	786.37	Filtered			libDIA-6xlib	O14672	O14672	ADAM10	Disintegrin and metalloproteinase domain-containing protein 10	O14672	ADA10_HUMAN	Filtered	Filtered	Filtered			dirDIA	O43760	O43760	SYNGR2	Synaptogyrin-2	O43760	SNG2_HUMAN	1963.36	2681.18	1526.59
libDIA-22xlib	O14744	O14744	PRMT5	Protein arginine N-methyltransferase 5	O14744	ANM5_HUMAN	870.86	Filtered	0.449455			libDIA-6xlib	O14684	O14684	PTGES	Prostaglandin E synthase	O14684	PTGES_HUMAN	6531.86	7570.9	3850.21			dirDIA	O43776	O43776	NARS	Asparagine--tRNA ligase, cytoplasmic	O43776	SYNC_HUMAN	2597.55	1426.19	2322.16
libDIA-22xlib	O14745	O14745	SLC9A3R1	Na(+)/H(+) exchange regulatory cofactor NHE-RF1	O14745	NHRF1_HUMAN	Filtered	0.639336	Filtered			libDIA-6xlib	O14737	O14737	PDCD5	Programmed cell death protein 5	O14737	PDCD5_HUMAN	538.575	1123.79	1202.63			dirDIA	O43809	O43809	NUDT21	Cleavage and polyadenylation specificity factor subunit 5	O43809	CPSF5_HUMAN	Filtered	Filtered	Filtered
libDIA-22xlib	O14776	O14776	TCERG1	Transcription elongation regulator 1	O14776	TCRG1_HUMAN	Filtered	Filtered	Filtered			libDIA-6xlib	O14744	O14744	PRMT5	Protein arginine N-methyltransferase 5	O14744	ANM5_HUMAN	Filtered	Filtered	Filtered			dirDIA	O43852	O43852	CALU	Calumenin	O43852	CALU_HUMAN	104.04	1892.63	1554.19
libDIA-22xlib	O14818	O14818	PSMA7	Proteasome subunit alpha type-7	O14818	PSA7_HUMAN	5295.19	6752.52	6740.17			libDIA-6xlib	O14745	O14745	SLC9A3R1	Na(+)/H(+) exchange regulatory cofactor NHE-RF1	O14745	NHRF1_HUMAN	Filtered	Filtered	Filtered			dirDIA	O60218	O60218	AKR1B10	Aldo-keto reductase family 1 member B10	O60218	AK1BA_HUMAN	3360.13	708.404	3232.01
libDIA-22xlib	O14908	O14908	GIPC1	PDZ domain-containing protein GIPC1	O14908	GIPC1_HUMAN	Filtered	Filtered	0.499809			libDIA-6xlib	O14776	O14776	TCERG1	Transcription elongation regulator 1	O14776	TCRG1_HUMAN	Filtered	Filtered	Filtered			dirDIA	O60506	O60506	SYNCRIP	Heterogeneous nuclear ribonucleoprotein Q	O60506	HNRPQ_HUMAN	2930.1	3822.58	5282.73
libDIA-22xlib	O14910;Q9HAP6;Q9NUP9	O14910;Q9HAP6;Q9NUP9	LIN7A;LIN7B;LIN7C	Protein lin-7 homolog A;Protein lin-7 homolog B;Protein lin-7 homolog C	O14910;Q9HAP6;Q9NUP9	LIN7A_HUMAN;LIN7B_HUMAN;LIN7C_HUMAN	Filtered	Filtered	Filtered			libDIA-6xlib	O14818	O14818	PSMA7	Proteasome subunit alpha type-7	O14818	PSA7_HUMAN	5363.22	7085.97	7146.04			dirDIA	O60664	O60664	PLIN3	Perilipin-3	O60664	PLIN3_HUMAN	0.80658	2305.82	958.604
libDIA-22xlib	O14929	O14929	HAT1	Histone acetyltransferase type B catalytic subunit	O14929	HAT1_HUMAN	Filtered	898.574	635.568			libDIA-6xlib	O14908	O14908	GIPC1	PDZ domain-containing protein GIPC1	O14908	GIPC1_HUMAN	Filtered	75.4676	Filtered			dirDIA	O60701	O60701	UGDH	UDP-glucose 6-dehydrogenase	O60701	UGDH_HUMAN	2073.02	2931.43	4357.84
libDIA-22xlib	O14950;P19105	O14950;P19105	MYL12B;MYL12A	Myosin regulatory light chain 12B;Myosin regulatory light chain 12A	O14950;P19105	ML12B_HUMAN;ML12A_HUMAN	6336.17	9612.44	9417.52			libDIA-6xlib	O14910;Q9HAP6;Q9NUP9	O14910;Q9HAP6;Q9NUP9	LIN7A;LIN7B;LIN7C	Protein lin-7 homolog A;Protein lin-7 homolog B;Protein lin-7 homolog C	O14910;Q9HAP6;Q9NUP9	LIN7A_HUMAN;LIN7B_HUMAN;LIN7C_HUMAN	Filtered	Filtered	Filtered			dirDIA	O60716	O60716	CTNND1	Catenin delta-1	O60716	CTND1_HUMAN	461.733	1379.38	870.2
libDIA-22xlib	O14964	O14964	HGS	Hepatocyte growth factor-regulated tyrosine kinase substrate	O14964	HGS_HUMAN	Filtered	Filtered	Filtered			libDIA-6xlib	O14929	O14929	HAT1	Histone acetyltransferase type B catalytic subunit	O14929	HAT1_HUMAN	Filtered	459.647	1270.41			dirDIA	O60739;P41567	O60739;P41567	EIF1B;EIF1	Eukaryotic translation initiation factor 1b;Eukaryotic translation initiation factor 1	O60739;P41567	EIF1B_HUMAN;EIF1_HUMAN	0.525146	1004.93	1385.51
libDIA-22xlib	O14979	O14979	HNRNPDL	Heterogeneous nuclear ribonucleoprotein D-like	O14979	HNRDL_HUMAN	4726.81	4570.17	9166.29			libDIA-6xlib	O14950;P19105	O14950;P19105	MYL12B;MYL12A	Myosin regulatory light chain 12B;Myosin regulatory light chain 12A	O14950;P19105	ML12B_HUMAN;ML12A_HUMAN	6206.88	9602	8538.13			dirDIA	O60749;Q13596	O60749;Q13596	SNX2;SNX1	Sorting nexin-2;Sorting nexin-1	O60749;Q13596	SNX2_HUMAN;SNX1_HUMAN	Filtered	614.526	405.886
libDIA-22xlib	O14980	O14980	XPO1	Exportin-1	O14980	XPO1_HUMAN	210.897	Filtered	757.884			libDIA-6xlib	O14964	O14964	HGS	Hepatocyte growth factor-regulated tyrosine kinase substrate	O14964	HGS_HUMAN	Filtered	Filtered	Filtered			dirDIA	O60814;P57053;P58876;P62807;Q5QNW6;Q93079;Q99877;Q99879;Q99880	O60814;P57053;P58876;P62807;Q5QNW6;Q93079;Q99877;Q99879;Q99880	HIST1H2BK;H2BFS;HIST1H2BD;HIST1H2BC;HIST2H2BF;HIST1H2BH;HIST1H2BN;HIST1H2BM;HIST1H2BL	Histone H2B type 1-K;Histone H2B type F-S;Histone H2B type 1-D;Histone H2B type 1-C/E/F/G/I;Histone H2B type 2-F;Histone H2B type 1-H;Histone H2B type 1-N;Histone H2B type 1-M;Histone H2B type 1-L	O60814;P57053;P58876;P62807;Q5QNW6;Q93079;Q99877;Q99879;Q99880	H2B1K_HUMAN;H2BFS_HUMAN;H2B1D_HUMAN;H2B1C_HUMAN;H2B2F_HUMAN;H2B1H_HUMAN;H2B1N_HUMAN;H2B1M_HUMAN;H2B1L_HUMAN	26942.3	48200.4	48978.9
libDIA-22xlib	O15127	O15127	SCAMP2	Secretory carrier-associated membrane protein 2	O15127	SCAM2_HUMAN	Filtered	Filtered	Filtered			libDIA-6xlib	O14979	O14979	HNRNPDL	Heterogeneous nuclear ribonucleoprotein D-like	O14979	HNRDL_HUMAN	1568.9	969.189	1798.82			dirDIA	O60841	O60841	EIF5B	Eukaryotic translation initiation factor 5B	O60841	IF2P_HUMAN	716.361	626.928	844.982
libDIA-22xlib	O15143	O15143	ARPC1B	Actin-related protein 2/3 complex subunit 1B	O15143	ARC1B_HUMAN	1473.61	1741.08	Filtered			libDIA-6xlib	O14980	O14980	XPO1	Exportin-1	O14980	XPO1_HUMAN	Filtered	Filtered	345.122			dirDIA	O60884	O60884	DNAJA2	DnaJ homolog subfamily A member 2	O60884	DNJA2_HUMAN	660.59	377.329	481.879
libDIA-22xlib	O15144	O15144	ARPC2	Actin-related protein 2/3 complex subunit 2	O15144	ARPC2_HUMAN	3207.47	3571.04	2881.4			libDIA-6xlib	O15127	O15127	SCAMP2	Secretory carrier-associated membrane protein 2	O15127	SCAM2_HUMAN	Filtered	Filtered	Filtered			dirDIA	O60925	O60925	PFDN1	Prefoldin subunit 1	O60925	PFD1_HUMAN	Filtered	1447.38	3179.56
libDIA-22xlib	O15145	O15145	ARPC3	Actin-related protein 2/3 complex subunit 3	O15145	ARPC3_HUMAN	4844.34	5306.33	3612.58			libDIA-6xlib	O15143	O15143	ARPC1B	Actin-related protein 2/3 complex subunit 1B	O15143	ARC1B_HUMAN	1543.21	1526.99	1190.22			dirDIA	O75083	O75083	WDR1	WD repeat-containing protein 1	O75083	WDR1_HUMAN	4412.62	9154.4	4878.34
libDIA-22xlib	O15173	O15173	PGRMC2	Membrane-associated progesterone receptor component 2	O15173	PGRC2_HUMAN	Filtered	Filtered	Filtered			libDIA-6xlib	O15144	O15144	ARPC2	Actin-related protein 2/3 complex subunit 2	O15144	ARPC2_HUMAN	2745.66	2326.55	2631.48			dirDIA	O75131	O75131	CPNE3	Copine-3	O75131	CPNE3_HUMAN	2539.56	1948.9	2017.28
libDIA-22xlib	O15212	O15212	PFDN6	Prefoldin subunit 6	O15212	PFD6_HUMAN	541.199	1719.82	Filtered			libDIA-6xlib	O15145	O15145	ARPC3	Actin-related protein 2/3 complex subunit 3	O15145	ARPC3_HUMAN	4844.28	5306.39	3612.64			dirDIA	O75223	O75223	GGCT	Gamma-glutamylcyclotransferase	O75223	GGCT_HUMAN	502.82	1959.02	711.635
libDIA-22xlib	O15231	O15231	ZNF185	Zinc finger protein 185	O15231	ZN185_HUMAN	Filtered	1528.44	Filtered			libDIA-6xlib	O15173	O15173	PGRMC2	Membrane-associated progesterone receptor component 2	O15173	PGRC2_HUMAN	Filtered	Filtered	Filtered			dirDIA	O75340	O75340	PDCD6	Programmed cell death protein 6	O75340	PDCD6_HUMAN	Filtered	522.326	4777.92
libDIA-22xlib	O15260	O15260	SURF4	Surfeit locus protein 4	O15260	SURF4_HUMAN	Filtered	Filtered	Filtered			libDIA-6xlib	O15212	O15212	PFDN6	Prefoldin subunit 6	O15212	PFD6_HUMAN	838.811	789.664	59.3335			dirDIA	O75342	O75342	ALOX12B	Arachidonate 12-lipoxygenase, 12R-type	O75342	LX12B_HUMAN	Filtered	557.295	563.577
libDIA-22xlib	O15305	O15305	PMM2	Phosphomannomutase 2	O15305	PMM2_HUMAN	865.991	683.687	Filtered			libDIA-6xlib	O15226	O15226	NKRF	NF-kappa-B-repressing factor	O15226	NKRF_HUMAN	Filtered	Filtered	Filtered			dirDIA	O75347	O75347	TBCA	Tubulin-specific chaperone A	O75347	TBCA_HUMAN	4883.36	8112.89	5332.01
libDIA-22xlib	O15347	O15347	HMGB3	High mobility group protein B3	O15347	HMGB3_HUMAN	424.906	1063.71	553.783			libDIA-6xlib	O15231	O15231	ZNF185	Zinc finger protein 185	O15231	ZN185_HUMAN	Filtered	Filtered	Filtered			dirDIA	O75367	O75367	H2AFY	Core histone macro-H2A.1	O75367	H2AY_HUMAN	4261.14	5847.38	4556.38
libDIA-22xlib	O15355	O15355	PPM1G	Protein phosphatase 1G	O15355	PPM1G_HUMAN	687.565	633.337	1783.54			libDIA-6xlib	O15305	O15305	PMM2	Phosphomannomutase 2	O15305	PMM2_HUMAN	Filtered	860.294	1030.04			dirDIA	O75369	O75369	FLNB	Filamin-B	O75369	FLNB_HUMAN	13942.5	17262.7	17235.2
libDIA-22xlib	O15371	O15371	EIF3D	Eukaryotic translation initiation factor 3 subunit D	O15371	EIF3D_HUMAN	2078.7	3747.34	3758.54			libDIA-6xlib	O15347	O15347	HMGB3	High mobility group protein B3	O15347	HMGB3_HUMAN	1243.85	1405.37	1781.77			dirDIA	O75390	O75390	CS	Citrate synthase, mitochondrial	O75390	CISY_HUMAN	Filtered	Filtered	786.094
libDIA-22xlib	O15427	O15427	SLC16A3	Monocarboxylate transporter 4	O15427	MOT4_HUMAN	Filtered	Filtered	Filtered			libDIA-6xlib	O15355	O15355	PPM1G	Protein phosphatase 1G	O15355	PPM1G_HUMAN	Filtered	Filtered	667.123			dirDIA	O75396	O75396	SEC22B	Vesicle-trafficking protein SEC22b	O75396	SC22B_HUMAN	Filtered	174.963	Filtered
libDIA-22xlib	O15511	O15511	ARPC5	Actin-related protein 2/3 complex subunit 5	O15511	ARPC5_HUMAN	7896.73	6686.11	5281.45			libDIA-6xlib	O15371	O15371	EIF3D	Eukaryotic translation initiation factor 3 subunit D	O15371	EIF3D_HUMAN	2078.66	3232.92	3421.71			dirDIA	O75531	O75531	BANF1	Barrier-to-autointegration factor	O75531	BAF_HUMAN	762.576	Filtered	Filtered
libDIA-22xlib	O43143	O43143	DHX15	Pre-mRNA-splicing factor ATP-dependent RNA helicase DHX15	O43143	DHX15_HUMAN	1580.77	846.253	1441.11			libDIA-6xlib	O15372	O15372	EIF3H	Eukaryotic translation initiation factor 3 subunit H	O15372	EIF3H_HUMAN	Filtered	Filtered	Filtered			dirDIA	O75534	O75534	CSDE1	Cold shock domain-containing protein E1	O75534	CSDE1_HUMAN	500.506	1173.07	1062.18
libDIA-22xlib	O43175	O43175	PHGDH	D-3-phosphoglycerate dehydrogenase	O43175	SERA_HUMAN	2550.57	3624.1	6160.19			libDIA-6xlib	O15427	O15427	SLC16A3	Monocarboxylate transporter 4	O15427	MOT4_HUMAN	Filtered	Filtered	Filtered			dirDIA	O75821	O75821	EIF3G	Eukaryotic translation initiation factor 3 subunit G	O75821	EIF3G_HUMAN	956.642	1987.01	2199.57
libDIA-22xlib	O43242	O43242	PSMD3	26S proteasome non-ATPase regulatory subunit 3	O43242	PSMD3_HUMAN	10583.1	9173.86	16182			libDIA-6xlib	O15511	O15511	ARPC5	Actin-related protein 2/3 complex subunit 5	O15511	ARPC5_HUMAN	8601.57	7414.7	5725.61			dirDIA	O75822	O75822	EIF3J	Eukaryotic translation initiation factor 3 subunit J	O75822	EIF3J_HUMAN	1852.16	2541.28	1997.97
libDIA-22xlib	O43324	O43324	EEF1E1	Eukaryotic translation elongation factor 1 epsilon-1	O43324	MCA3_HUMAN	Filtered	Filtered	Filtered			libDIA-6xlib	O43143	O43143	DHX15	Pre-mRNA-splicing factor ATP-dependent RNA helicase DHX15	O43143	DHX15_HUMAN	647.272	710.152	2715.49			dirDIA	O75828;P16152	O75828;P16152	CBR3;CBR1	Carbonyl reductase [NADPH] 3;Carbonyl reductase [NADPH] 1	O75828;P16152	CBR3_HUMAN;CBR1_HUMAN	Filtered	Filtered	395.418
libDIA-22xlib	O43390	O43390	HNRNPR	Heterogeneous nuclear ribonucleoprotein R	O43390	HNRPR_HUMAN	283.984	Filtered	Filtered			libDIA-6xlib	O43175	O43175	PHGDH	D-3-phosphoglycerate dehydrogenase	O43175	SERA_HUMAN	2321.96	2614.3	4802.4			dirDIA	O75874	O75874	IDH1	Isocitrate dehydrogenase [NADP] cytoplasmic	O75874	IDHC_HUMAN	2112.09	1470.4	2525.56
libDIA-22xlib	O43396	O43396	TXNL1	Thioredoxin-like protein 1	O43396	TXNL1_HUMAN	Filtered	680.501	Filtered			libDIA-6xlib	O43181	O43181	NDUFS4	NADH dehydrogenase [ubiquinone] iron-sulfur protein 4, mitochondrial	O43181	NDUS4_HUMAN	Filtered	Filtered	Filtered			dirDIA	O76003	O76003	GLRX3	Glutaredoxin-3	O76003	GLRX3_HUMAN	2551.05	2395.28	2335.95
libDIA-22xlib	O43399	O43399	TPD52L2	Tumor protein D54	O43399	TPD54_HUMAN	3855.16	3770.29	5072.2			libDIA-6xlib	O43237	O43237	DYNC1LI2	Cytoplasmic dynein 1 light intermediate chain 2	O43237	DC1L2_HUMAN	Filtered	Filtered	Filtered			dirDIA	O94776	O94776	MTA2	Metastasis-associated protein MTA2	O94776	MTA2_HUMAN	Filtered	Filtered	Filtered
libDIA-22xlib	O43447	O43447	PPIH	Peptidyl-prolyl cis-trans isomerase H	O43447	PPIH_HUMAN	Filtered	Filtered	Filtered			libDIA-6xlib	O43242	O43242	PSMD3	26S proteasome non-ATPase regulatory subunit 3	O43242	PSMD3_HUMAN	408.364	640.307	3030.73			dirDIA	O94826	O94826	TOMM70A	Mitochondrial import receptor subunit TOM70	O94826	TOM70_HUMAN	Filtered	Filtered	Filtered
libDIA-22xlib	O43491	O43491	EPB41L2	Band 4.1-like protein 2	O43491	E41L2_HUMAN	Filtered	0.439087	Filtered			libDIA-6xlib	O43324	O43324	EEF1E1	Eukaryotic translation elongation factor 1 epsilon-1	O43324	MCA3_HUMAN	890.933	353.268	Filtered			dirDIA	O95197	O95197	RTN3	Reticulon-3	O95197	RTN3_HUMAN	2592.42	3438.4	4040.05
libDIA-22xlib	O43583	O43583	DENR	Density-regulated protein	O43583	DENR_HUMAN	Filtered	Filtered	970.475			libDIA-6xlib	O43390	O43390	HNRNPR	Heterogeneous nuclear ribonucleoprotein R	O43390	HNRPR_HUMAN	Filtered	0.436844	Filtered			dirDIA	O95202	O95202	LETM1	LETM1 and EF-hand domain-containing protein 1, mitochondrial	O95202	LETM1_HUMAN	Filtered	Filtered	Filtered
libDIA-22xlib	O43615	O43615	TIMM44	Mitochondrial import inner membrane translocase subunit TIM44	O43615	TIM44_HUMAN	Filtered	Filtered	126319			libDIA-6xlib	O43395	O43395	PRPF3	U4/U6 small nuclear ribonucleoprotein Prp3	O43395	PRPF3_HUMAN	Filtered	Filtered	Filtered			dirDIA	O95292;Q9P0L0	O95292;Q9P0L0	VAPB;VAPA	Vesicle-associated membrane protein-associated protein B/C;Vesicle-associated membrane protein-associated protein A	O95292;Q9P0L0	VAPB_HUMAN;VAPA_HUMAN	1168.61	2298.28	1576.49
libDIA-22xlib	O43617	O43617	TRAPPC3	Trafficking protein particle complex subunit 3	O43617	TPPC3_HUMAN	Filtered	Filtered	Filtered			libDIA-6xlib	O43396	O43396	TXNL1	Thioredoxin-like protein 1	O43396	TXNL1_HUMAN	Filtered	Filtered	Filtered			dirDIA	O95336	O95336	PGLS	6-phosphogluconolactonase	O95336	6PGL_HUMAN	2027.35	2066.61	2135.69
libDIA-22xlib	O43670	O43670	ZNF207	BUB3-interacting and GLEBS motif-containing protein ZNF207	O43670	ZN207_HUMAN	699.976	2237.07	2266.88			libDIA-6xlib	O43399	O43399	TPD52L2	Tumor protein D54	O43399	TPD54_HUMAN	2766.77	3032.94	5072.17			dirDIA	O95342	O95342	ABCB11	Bile salt export pump	O95342	ABCBB_HUMAN	3213.23	7594.63	55045.7
libDIA-22xlib	O43684	O43684	BUB3	Mitotic checkpoint protein BUB3	O43684	BUB3_HUMAN	1275.03	Filtered	5193.76			libDIA-6xlib	O43447	O43447	PPIH	Peptidyl-prolyl cis-trans isomerase H	O43447	PPIH_HUMAN	Filtered	Filtered	Filtered			dirDIA	O95347	O95347	SMC2	Structural maintenance of chromosomes protein 2	O95347	SMC2_HUMAN	Filtered	Filtered	Filtered
libDIA-22xlib	O43707	O43707	ACTN4	Alpha-actinin-4	O43707	ACTN4_HUMAN	11970.5	18887.7	19150.9			libDIA-6xlib	O43488	O43488	AKR7A2	Aflatoxin B1 aldehyde reductase member 2	O43488	ARK72_HUMAN	Filtered	Filtered	Filtered			dirDIA	O95433	O95433	AHSA1	Activator of 90 kDa heat shock protein ATPase homolog 1	O95433	AHSA1_HUMAN	4935.04	11926	9937.22
libDIA-22xlib	O43708	O43708	GSTZ1	Maleylacetoacetate isomerase	O43708	MAAI_HUMAN	7791391	Filtered	7.26998e+06			libDIA-6xlib	O43491	O43491	EPB41L2	Band 4.1-like protein 2	O43491	E41L2_HUMAN	Filtered	Filtered	Filtered			dirDIA	O95573	O95573	ACSL3	Long-chain-fatty-acid--CoA ligase 3	O95573	ACSL3_HUMAN	567.495	502.023	Filtered
libDIA-22xlib	O43719	O43719	HTATSF1	HIV Tat-specific factor 1	O43719	HTSF1_HUMAN	1214.24	1940.96	2593.38			libDIA-6xlib	O43583	O43583	DENR	Density-regulated protein	O43583	DENR_HUMAN	Filtered	2723.39	970.501			dirDIA	O95816	O95816	BAG2	BAG family molecular chaperone regulator 2	O95816	BAG2_HUMAN	167.925	Filtered	Filtered
libDIA-22xlib	O43760	O43760	SYNGR2	Synaptogyrin-2	O43760	SNG2_HUMAN	1453.07	1909.43	1375.33			libDIA-6xlib	O43617	O43617	TRAPPC3	Trafficking protein particle complex subunit 3	O43617	TPPC3_HUMAN	Filtered	Filtered	Filtered			dirDIA	O95861	O95861	BPNT1	3'(2'),5'-bisphosphate nucleotidase 1	O95861	BPNT1_HUMAN	Filtered	Filtered	Filtered
libDIA-22xlib	O43765	O43765	SGTA	Small glutamine-rich tetratricopeptide repeat-containing protein alpha	O43765	SGTA_HUMAN	Filtered	1234.7	1381.55			libDIA-6xlib	O43633	O43633	CHMP2A	Charged multivesicular body protein 2a	O43633	CHM2A_HUMAN	Filtered	Filtered	Filtered			dirDIA	P00338	P00338	LDHA	L-lactate dehydrogenase A chain	P00338	LDHA_HUMAN	85342.7	91332.3	84974.3
libDIA-22xlib	O43776	O43776	NARS	Asparagine--tRNA ligase, cytoplasmic	O43776	SYNC_HUMAN	1696.52	2891.41	2220.5			libDIA-6xlib	O43670	O43670	ZNF207	BUB3-interacting and GLEBS motif-containing protein ZNF207	O43670	ZN207_HUMAN	363.902	1765.35	1592.81			dirDIA	P00367;P49448	P00367;P49448	GLUD1;GLUD2	Glutamate dehydrogenase 1, mitochondrial;Glutamate dehydrogenase 2, mitochondrial	P00367;P49448	DHE3_HUMAN;DHE4_HUMAN	204.635	Filtered	Filtered
libDIA-22xlib	O43795	O43795	MYO1B	Unconventional myosin-Ib	O43795	MYO1B_HUMAN	Filtered	Filtered	Filtered			libDIA-6xlib	O43676	O43676	NDUFB3	NADH dehydrogenase [ubiquinone] 1 beta subcomplex subunit 3	O43676	NDUB3_HUMAN	Filtered	Filtered	Filtered			dirDIA	P00390	P00390	GSR	Glutathione reductase, mitochondrial	P00390	GSHR_HUMAN	508.764	931.376	1063.27
libDIA-22xlib	O43809	O43809	NUDT21	Cleavage and polyadenylation specificity factor subunit 5	O43809	CPSF5_HUMAN	Filtered	Filtered	2486.89			libDIA-6xlib	O43681	O43681	ASNA1	ATPase ASNA1	O43681	ASNA_HUMAN	Filtered	Filtered	Filtered			dirDIA	P00403	P00403	MT-CO2	Cytochrome c oxidase subunit 2	P00403	COX2_HUMAN	7519.88	16926.1	8219.08
libDIA-22xlib	O43847	O43847	NRD1	Nardilysin	O43847	NRDC_HUMAN	Filtered	Filtered	Filtered			libDIA-6xlib	O43684	O43684	BUB3	Mitotic checkpoint protein BUB3	O43684	BUB3_HUMAN	1507.63	Filtered	5193.76			dirDIA	P00441	P00441	SOD1	Superoxide dismutase [Cu-Zn]	P00441	SODC_HUMAN	407.469	916.155	1955.75
libDIA-22xlib	O43852	O43852	CALU	Calumenin	O43852	CALU_HUMAN	9485.01	7589.36	2378.35			libDIA-6xlib	O43707	O43707	ACTN4	Alpha-actinin-4	O43707	ACTN4_HUMAN	13354.6	21496.6	22084.6			dirDIA	P00492	P00492	HPRT1	Hypoxanthine-guanine phosphoribosyltransferase	P00492	HPRT_HUMAN	Filtered	2174.4	1643.67
libDIA-22xlib	O43865	O43865	AHCYL1	Adenosylhomocysteinase 2	O43865	SAHH2_HUMAN	Filtered	Filtered	Filtered			libDIA-6xlib	O43708	O43708	GSTZ1	Maleylacetoacetate isomerase	O43708	MAAI_HUMAN	Filtered	Filtered	Filtered			dirDIA	P00505	P00505	GOT2	Aspartate aminotransferase, mitochondrial	P00505	AATM_HUMAN	1892.44	3180.84	2293.32
libDIA-22xlib	O60218	O60218	AKR1B10	Aldo-keto reductase family 1 member B10	O60218	AK1BA_HUMAN	797.66	1389.54	3231.94			libDIA-6xlib	O43719	O43719	HTATSF1	HIV Tat-specific factor 1	O43719	HTSF1_HUMAN	1214.22	1940.9	2593.32			dirDIA	P00558	P00558	PGK1	Phosphoglycerate kinase 1	P00558	PGK1_HUMAN	8216.41	9468.54	10661.7
libDIA-22xlib	O60264;P28370	O60264;P28370	SMARCA5;SMARCA1	SWI/SNF-related matrix-associated actin-dependent regulator of chromatin subfamily A member 5;Probable global transcription activator SNF2L1	O60264;P28370	SMCA5_HUMAN;SMCA1_HUMAN	Filtered	Filtered	Filtered			libDIA-6xlib	O43747	O43747	AP1G1	AP-1 complex subunit gamma-1	O43747	AP1G1_HUMAN	Filtered	Filtered	Filtered			dirDIA	P00568	P00568	AK1	Adenylate kinase isoenzyme 1	P00568	KAD1_HUMAN	Filtered	Filtered	3171.65
libDIA-22xlib	O60313	O60313	OPA1	Dynamin-like 120 kDa protein, mitochondrial	O60313	OPA1_HUMAN	Filtered	Filtered	685.613			libDIA-6xlib	O43760	O43760	SYNGR2	Synaptogyrin-2	O43760	SNG2_HUMAN	2421.58	2784.25	1526.63			dirDIA	P01023	P01023	A2M	Alpha-2-macroglobulin	P01023	A2MG_HUMAN	30836.7	48196.9	10803.3
libDIA-22xlib	O60437	O60437	PPL	Periplakin	O60437	PEPL_HUMAN	Filtered	1307374	Filtered			libDIA-6xlib	O43765	O43765	SGTA	Small glutamine-rich tetratricopeptide repeat-containing protein alpha	O43765	SGTA_HUMAN	Filtered	Filtered	Filtered			dirDIA	P01040	P01040	CSTA	Cystatin-A	P01040	CYTA_HUMAN	2878.71	6472.8	4982.23
libDIA-22xlib	O60493	O60493	SNX3	Sorting nexin-3	O60493	SNX3_HUMAN	Filtered	4511.96	4729.01			libDIA-6xlib	O43776	O43776	NARS	Asparagine--tRNA ligase, cytoplasmic	O43776	SYNC_HUMAN	1295.67	2252.09	1864.11			dirDIA	P02533	P02533	KRT14	Keratin, type I cytoskeletal 14	P02533	K1C14_HUMAN	9740.42	75158.7	34722.7
libDIA-22xlib	O60506	O60506	SYNCRIP	Heterogeneous nuclear ribonucleoprotein Q	O60506	HNRPQ_HUMAN	1800.08	3859.05	4607.08			libDIA-6xlib	O43795	O43795	MYO1B	Unconventional myosin-Ib	O43795	MYO1B_HUMAN	Filtered	Filtered	Filtered			dirDIA	P02538	P02538	KRT6A	Keratin, type II cytoskeletal 6A	P02538	K2C6A_HUMAN	85839.5	163884	345753
libDIA-22xlib	O60568	O60568	PLOD3	Procollagen-lysine,2-oxoglutarate 5-dioxygenase 3	O60568	PLOD3_HUMAN	Filtered	Filtered	Filtered			libDIA-6xlib	O43809	O43809	NUDT21	Cleavage and polyadenylation specificity factor subunit 5	O43809	CPSF5_HUMAN	Filtered	197.656	2423.71			dirDIA	P02545	P02545	LMNA	Prelamin-A/C	P02545	LMNA_HUMAN	15013.7	14695.8	10375.2
libDIA-22xlib	O60610	O60610	DIAPH1	Protein diaphanous homolog 1	O60610	DIAP1_HUMAN	1751.03	2106.59	Filtered			libDIA-6xlib	O43818	O43818	RRP9	U3 small nucleolar RNA-interacting protein 2	O43818	U3IP2_HUMAN	Filtered	Filtered	Filtered			dirDIA	P02656	P02656	APOC3	Apolipoprotein C-III	P02656	APOC3_HUMAN	7408.99	10261.6	4930.18
libDIA-22xlib	O60664	O60664	PLIN3	Perilipin-3	O60664	PLIN3_HUMAN	0.881607	867.954	1911.17			libDIA-6xlib	O43837	O43837	IDH3B	Isocitrate dehydrogenase [NAD] subunit beta, mitochondrial	O43837	IDH3B_HUMAN	Filtered	Filtered	Filtered			dirDIA	P02768	P02768	ALB	Serum albumin	P02768	ALBU_HUMAN	2.04271e+06	55952804	51265828
libDIA-22xlib	O60675	O60675	MAFK	Transcription factor MafK	O60675	MAFK_HUMAN	2013.82	952.064	Filtered			libDIA-6xlib	O43847	O43847	NRD1	Nardilysin	O43847	NRDC_HUMAN	Filtered	Filtered	Filtered			dirDIA	P02786	P02786	TFRC	Transferrin receptor protein 1	P02786	TFR1_HUMAN	0.6381	514.655	222.574
libDIA-22xlib	O60701	O60701	UGDH	UDP-glucose 6-dehydrogenase	O60701	UGDH_HUMAN	1652.83	2776.51	4485.59			libDIA-6xlib	O43852	O43852	CALU	Calumenin	O43852	CALU_HUMAN	2944.17	2613.5	1887.96			dirDIA	P02788	P02788	LTF	Lactotransferrin	P02788	TRFL_HUMAN	11716.5	13798	11477.9
libDIA-22xlib	O60716	O60716	CTNND1	Catenin delta-1	O60716	CTND1_HUMAN	571.555	1789.3	601.856			libDIA-6xlib	O43865;Q96HN2	O43865;Q96HN2	AHCYL1;AHCYL2	Adenosylhomocysteinase 2;Adenosylhomocysteinase 3	O43865;Q96HN2	SAHH2_HUMAN;SAHH3_HUMAN	Filtered	Filtered	Filtered			dirDIA	P04075	P04075	ALDOA	Fructose-bisphosphate aldolase A	P04075	ALDOA_HUMAN	73250.5	72327.2	63404.8
libDIA-22xlib	O60739;P41567	O60739;P41567	EIF1B;EIF1	Eukaryotic translation initiation factor 1b;Eukaryotic translation initiation factor 1	O60739;P41567	EIF1B_HUMAN;EIF1_HUMAN	Filtered	1350.5	1940.05			libDIA-6xlib	O60218	O60218	AKR1B10	Aldo-keto reductase family 1 member B10	O60218	AK1BA_HUMAN	3007.85	1585.86	3231.99			dirDIA	P04080	P04080	CSTB	Cystatin-B	P04080	CYTB_HUMAN	3945.69	8644.15	5339.04
libDIA-22xlib	O60749;Q13596	O60749;Q13596	SNX2;SNX1	Sorting nexin-2;Sorting nexin-1	O60749;Q13596	SNX2_HUMAN;SNX1_HUMAN	Filtered	614.57	405.937			libDIA-6xlib	O60220	O60220	TIMM8A	Mitochondrial import inner membrane translocase subunit Tim8 A	O60220	TIM8A_HUMAN	Filtered	Filtered	Filtered			dirDIA	P04083	P04083	ANXA1	Annexin A1	P04083	ANXA1_HUMAN	26542	25477.5	31239
libDIA-22xlib	O60762	O60762	DPM1	Dolichol-phosphate mannosyltransferase subunit 1	O60762	DPM1_HUMAN	Filtered	1762.03	Filtered			libDIA-6xlib	O60256	O60256	PRPSAP2	Phosphoribosyl pyrophosphate synthase-associated protein 2	O60256	KPRB_HUMAN	Filtered	Filtered	Filtered			dirDIA	P04181	P04181	OAT	Ornithine aminotransferase, mitochondrial	P04181	OAT_HUMAN	3135.43	1804.4	1710.55
libDIA-22xlib	O60763	O60763	USO1	General vesicular transport factor p115	O60763	USO1_HUMAN	Filtered	Filtered	Filtered			libDIA-6xlib	O60264	O60264	SMARCA5	SWI/SNF-related matrix-associated actin-dependent regulator of chromatin subfamily A member 5	O60264	SMCA5_HUMAN	Filtered	Filtered	Filtered			dirDIA	P04264	P04264	KRT1	Keratin, type II cytoskeletal 1	P04264	K2C1_HUMAN	471431	2.1748e+06	1206465
libDIA-22xlib	O60814;P57053;P58876;P62807;Q5QNW6;Q93079;Q99877;Q99879;Q99880	O60814;P57053;P58876;P62807;Q5QNW6;Q93079;Q99877;Q99879;Q99880	HIST1H2BK;H2BFS;HIST1H2BD;HIST1H2BC;HIST2H2BF;HIST1H2BH;HIST1H2BN;HIST1H2BM;HIST1H2BL	Histone H2B type 1-K;Histone H2B type F-S;Histone H2B type 1-D;Histone H2B type 1-C/E/F/G/I;Histone H2B type 2-F;Histone H2B type 1-H;Histone H2B type 1-N;Histone H2B type 1-M;Histone H2B type 1-L	O60814;P57053;P58876;P62807;Q5QNW6;Q93079;Q99877;Q99879;Q99880	H2B1K_HUMAN;H2BFS_HUMAN;H2B1D_HUMAN;H2B1C_HUMAN;H2B2F_HUMAN;H2B1H_HUMAN;H2B1N_HUMAN;H2B1M_HUMAN;H2B1L_HUMAN	26884.4	48004.7	48954			libDIA-6xlib	O60313	O60313	OPA1	Dynamin-like 120 kDa protein, mitochondrial	O60313	OPA1_HUMAN	Filtered	Filtered	Filtered			dirDIA	P04406	P04406	GAPDH	Glyceraldehyde-3-phosphate dehydrogenase	P04406	G3P_HUMAN	35147.6	47281.7	36094.7
libDIA-22xlib	O60841	O60841	EIF5B	Eukaryotic translation initiation factor 5B	O60841	IF2P_HUMAN	Filtered	1958.22	838.714			libDIA-6xlib	O60437	O60437	PPL	Periplakin	O60437	PEPL_HUMAN	Filtered	317.063	Filtered			dirDIA	P04632	P04632	CAPNS1	Calpain small subunit 1	P04632	CPNS1_HUMAN	1847.53	3318.34	2624.48
libDIA-22xlib	O60869	O60869	EDF1	Endothelial differentiation-related factor 1	O60869	EDF1_HUMAN	Filtered	Filtered	Filtered			libDIA-6xlib	O60506	O60506	SYNCRIP	Heterogeneous nuclear ribonucleoprotein Q	O60506	HNRPQ_HUMAN	3082.44	3993.13	4456.8			dirDIA	P04792	P04792	HSPB1	Heat shock protein beta-1	P04792	HSPB1_HUMAN	3061.87	3641.02	4900.14
libDIA-22xlib	O60884	O60884	DNAJA2	DnaJ homolog subfamily A member 2	O60884	DNJA2_HUMAN	Filtered	Filtered	Filtered			libDIA-6xlib	O60568	O60568	PLOD3	Procollagen-lysine,2-oxoglutarate 5-dioxygenase 3	O60568	PLOD3_HUMAN	Filtered	Filtered	Filtered			dirDIA	P04843	P04843	RPN1	Dolichyl-diphosphooligosaccharide--protein glycosyltransferase subunit 1	P04843	RPN1_HUMAN	1919.72	2523.62	2247.87
libDIA-22xlib	O60925	O60925	PFDN1	Prefoldin subunit 1	O60925	PFD1_HUMAN	Filtered	1846.07	3712.89			libDIA-6xlib	O60610	O60610	DIAPH1	Protein diaphanous homolog 1	O60610	DIAP1_HUMAN	Filtered	Filtered	Filtered			dirDIA	P04844	P04844	RPN2	Dolichyl-diphosphooligosaccharide--protein glycosyltransferase subunit 2	P04844	RPN2_HUMAN	124.146	171.982	Filtered
libDIA-22xlib	O75083	O75083	WDR1	WD repeat-containing protein 1	O75083	WDR1_HUMAN	5445.87	Filtered	5313.03			libDIA-6xlib	O60664	O60664	PLIN3	Perilipin-3	O60664	PLIN3_HUMAN	0.881596	2087.01	1911.26			dirDIA	P04908;P0C0S8;P20671;Q16777;Q6FI13;Q7L7L0;Q93077;Q96KK5;Q99878;Q9BTM1	P04908;P0C0S8;P20671;Q16777;Q6FI13;Q7L7L0;Q93077;Q96KK5;Q99878;Q9BTM1	HIST1H2AB;HIST1H2AG;HIST1H2AD;HIST2H2AC;HIST2H2AA3;HIST3H2A;HIST1H2AC;HIST1H2AH;HIST1H2AJ;H2AFJ	Histone H2A type 1-B/E;Histone H2A type 1;Histone H2A type 1-D;Histone H2A type 2-C;Histone H2A type 2-A;Histone H2A type 3;Histone H2A type 1-C;Histone H2A type 1-H;Histone H2A type 1-J;Histone H2A.J	P04908;P0C0S8;P20671;Q16777;Q6FI13;Q7L7L0;Q93077;Q96KK5;Q99878;Q9BTM1	H2A1B_HUMAN;H2A1_HUMAN;H2A1D_HUMAN;H2A2C_HUMAN;H2A2A_HUMAN;H2A3_HUMAN;H2A1C_HUMAN;H2A1H_HUMAN;H2A1J_HUMAN;H2AJ_HUMAN	224679	140549	134140
libDIA-22xlib	O75131	O75131	CPNE3	Copine-3	O75131	CPNE3_HUMAN	3060.64	3157.25	2641			libDIA-6xlib	O60678	O60678	PRMT3	Protein arginine N-methyltransferase 3	O60678	ANM3_HUMAN	Filtered	Filtered	Filtered			dirDIA	P05023	P05023	ATP1A1	Sodium/potassium-transporting ATPase subunit alpha-1	P05023	AT1A1_HUMAN	858.419	2457.39	2161.33
libDIA-22xlib	O75153	O75153	CLUH	Clustered mitochondria protein homolog	O75153	CLU_HUMAN	Filtered	Filtered	Filtered			libDIA-6xlib	O60701	O60701	UGDH	UDP-glucose 6-dehydrogenase	O60701	UGDH_HUMAN	1652.81	2863.57	4025.51			dirDIA	P05109	P05109	S100A8	Protein S100-A8	P05109	S10A8_HUMAN	0.590675	181.81	Filtered
libDIA-22xlib	O75223	O75223	GGCT	Gamma-glutamylcyclotransferase	O75223	GGCT_HUMAN	Filtered	1395.23	224.458			libDIA-6xlib	O60716	O60716	CTNND1	Catenin delta-1	O60716	CTND1_HUMAN	735.496	1239.7	836.923			dirDIA	P05141	P05141	SLC25A5	ADP/ATP translocase 2	P05141	ADT2_HUMAN	8938.97	8878.87	6306.82
libDIA-22xlib	O75323	O75323	GBAS	Protein NipSnap homolog 2	O75323	NIPS2_HUMAN	Filtered	Filtered	Filtered			libDIA-6xlib	O60739;P41567	O60739;P41567	EIF1B;EIF1	Eukaryotic translation initiation factor 1b;Eukaryotic translation initiation factor 1	O60739;P41567	EIF1B_HUMAN;EIF1_HUMAN	Filtered	1458.22	2663.63			dirDIA	P05198	P05198	EIF2S1	Eukaryotic translation initiation factor 2 subunit 1	P05198	IF2A_HUMAN	5578.69	6900.94	8299.5
libDIA-22xlib	O75340	O75340	PDCD6	Programmed cell death protein 6	O75340	PDCD6_HUMAN	Filtered	529.216	4777.91			libDIA-6xlib	O60762	O60762	DPM1	Dolichol-phosphate mannosyltransferase subunit 1	O60762	DPM1_HUMAN	Filtered	Filtered	Filtered			dirDIA	P05387	P05387	RPLP2	60S acidic ribosomal protein P2	P05387	RLA2_HUMAN	14690.7	22963.8	18517.4
libDIA-22xlib	O75342	O75342	ALOX12B	Arachidonate 12-lipoxygenase, 12R-type	O75342	LX12B_HUMAN	Filtered	221.201	Filtered			libDIA-6xlib	O60763	O60763	USO1	General vesicular transport factor p115	O60763	USO1_HUMAN	Filtered	Filtered	Filtered			dirDIA	P05388	P05388	RPLP0	60S acidic ribosomal protein P0	P05388	RLA0_HUMAN	4058.94	6683.39	8472.72
libDIA-22xlib	O75347	O75347	TBCA	Tubulin-specific chaperone A	O75347	TBCA_HUMAN	4643.85	7805.13	5508.97			libDIA-6xlib	O60814;P57053;P58876;P62807;Q5QNW6;Q93079;Q99877;Q99879;Q99880	O60814;P57053;P58876;P62807;Q5QNW6;Q93079;Q99877;Q99879;Q99880	HIST1H2BK;H2BFS;HIST1H2BD;HIST1H2BC;HIST2H2BF;HIST1H2BH;HIST1H2BN;HIST1H2BM;HIST1H2BL	Histone H2B type 1-K;Histone H2B type F-S;Histone H2B type 1-D;Histone H2B type 1-C/E/F/G/I;Histone H2B type 2-F;Histone H2B type 1-H;Histone H2B type 1-N;Histone H2B type 1-M;Histone H2B type 1-L	O60814;P57053;P58876;P62807;Q5QNW6;Q93079;Q99877;Q99879;Q99880	H2B1K_HUMAN;H2BFS_HUMAN;H2B1D_HUMAN;H2B1C_HUMAN;H2B2F_HUMAN;H2B1H_HUMAN;H2B1N_HUMAN;H2B1M_HUMAN;H2B1L_HUMAN	28573.8	51076	52235			dirDIA	P05556	P05556	ITGB1	Integrin beta-1	P05556	ITB1_HUMAN	775.928	1446.5	191.039
libDIA-22xlib	O75348	O75348	ATP6V1G1	V-type proton ATPase subunit G 1	O75348	VATG1_HUMAN	Filtered	Filtered	Filtered			libDIA-6xlib	O60841	O60841	EIF5B	Eukaryotic translation initiation factor 5B	O60841	IF2P_HUMAN	928.747	1579.02	838.732			dirDIA	P05783	P05783	KRT18	Keratin, type I cytoskeletal 18	P05783	K1C18_HUMAN	65035.6	96669.9	70350.2
libDIA-22xlib	O75351;Q6PIW4;Q9UN37	O75351;Q6PIW4;Q9UN37	VPS4B;FIGNL1;VPS4A	Vacuolar protein sorting-associated protein 4B;Fidgetin-like protein 1;Vacuolar protein sorting-associated protein 4A	O75351;Q6PIW4;Q9UN37	VPS4B_HUMAN;FIGL1_HUMAN;VPS4A_HUMAN	Filtered	Filtered	2028.9			libDIA-6xlib	O60869	O60869	EDF1	Endothelial differentiation-related factor 1	O60869	EDF1_HUMAN	Filtered	Filtered	Filtered			dirDIA	P05787	P05787	KRT8	Keratin, type II cytoskeletal 8	P05787	K2C8_HUMAN	48219.6	72074.8	34670.9
libDIA-22xlib	O75367	O75367	H2AFY	Core histone macro-H2A.1	O75367	H2AY_HUMAN	4106.32	6057.35	4180.88			libDIA-6xlib	O60884	O60884	DNAJA2	DnaJ homolog subfamily A member 2	O60884	DNJA2_HUMAN	Filtered	Filtered	Filtered			dirDIA	P06396	P06396	GSN	Gelsolin	P06396	GELS_HUMAN	1014.23	1751.33	790.588
libDIA-22xlib	O75368	O75368	SH3BGRL	SH3 domain-binding glutamic acid-rich-like protein	O75368	SH3L1_HUMAN	Filtered	0.468784	Filtered			libDIA-6xlib	O60888	O60888	CUTA	Protein CutA	O60888	CUTA_HUMAN	Filtered	Filtered	Filtered			dirDIA	P06493	P06493	CDK1	Cyclin-dependent kinase 1	P06493	CDK1_HUMAN	3941.05	2658.98	2177.56
libDIA-22xlib	O75369	O75369	FLNB	Filamin-B	O75369	FLNB_HUMAN	13422.8	15309.4	17968.9			libDIA-6xlib	O60925	O60925	PFDN1	Prefoldin subunit 1	O60925	PFD1_HUMAN	Filtered	1943.97	3286.32			dirDIA	P06576	P06576	ATP5B	ATP synthase subunit beta, mitochondrial	P06576	ATPB_HUMAN	9050.54	8874.41	11407.8
libDIA-22xlib	O75390	O75390	CS	Citrate synthase, mitochondrial	O75390	CISY_HUMAN	773.683	1991.22	843.762			libDIA-6xlib	O75083	O75083	WDR1	WD repeat-containing protein 1	O75083	WDR1_HUMAN	6386.89	4655.76	5312.98			dirDIA	P06702	P06702	S100A9	Protein S100-A9	P06702	S10A9_HUMAN	233.176	505.789	Filtered
libDIA-22xlib	O75396	O75396	SEC22B	Vesicle-trafficking protein SEC22b	O75396	SC22B_HUMAN	Filtered	Filtered	Filtered			libDIA-6xlib	O75131	O75131	CPNE3	Copine-3	O75131	CPNE3_HUMAN	3060.08	3291.65	2863.8			dirDIA	P06727	P06727	APOA4	Apolipoprotein A-IV	P06727	APOA4_HUMAN	6362.11	11768.4	5778.27
libDIA-22xlib	O75400	O75400	PRPF40A	Pre-mRNA-processing factor 40 homolog A	O75400	PR40A_HUMAN	Filtered	Filtered	Filtered			libDIA-6xlib	O75153	O75153	CLUH	Clustered mitochondria protein homolog	O75153	CLU_HUMAN	Filtered	Filtered	Filtered			dirDIA	P06733	P06733	ENO1	Alpha-enolase	P06733	ENOA_HUMAN	30843.3	25040.5	36014.4
libDIA-22xlib	O75436	O75436	VPS26A	Vacuolar protein sorting-associated protein 26A	O75436	VP26A_HUMAN	1014.76	Filtered	Filtered			libDIA-6xlib	O75223	O75223	GGCT	Gamma-glutamylcyclotransferase	O75223	GGCT_HUMAN	273.494	1581.14	243.566			dirDIA	P06744	P06744	GPI	Glucose-6-phosphate isomerase	P06744	G6PI_HUMAN	1594.47	2028.94	1362.61
libDIA-22xlib	O75439	O75439	PMPCB	Mitochondrial-processing peptidase subunit beta	O75439	MPPB_HUMAN	423.938	Filtered	Filtered			libDIA-6xlib	O75306	O75306	NDUFS2	NADH dehydrogenase [ubiquinone] iron-sulfur protein 2, mitochondrial	O75306	NDUS2_HUMAN	Filtered	Filtered	Filtered			dirDIA	P06748	P06748	NPM1	Nucleophosmin	P06748	NPM_HUMAN	17303.8	16543.3	20179.7
libDIA-22xlib	O75475	O75475	PSIP1	PC4 and SFRS1-interacting protein	O75475	PSIP1_HUMAN	Filtered	Filtered	Filtered			libDIA-6xlib	O75340	O75340	PDCD6	Programmed cell death protein 6	O75340	PDCD6_HUMAN	Filtered	529.2	4777.94			dirDIA	P06753	P06753	TPM3	Tropomyosin alpha-3 chain	P06753	TPM3_HUMAN	17908.9	24882.9	28048.8
libDIA-22xlib	O75477;O94905	O75477;O94905	ERLIN1;ERLIN2	Erlin-1;Erlin-2	O75477;O94905	ERLN1_HUMAN;ERLN2_HUMAN	Filtered	Filtered	Filtered			libDIA-6xlib	O75342	O75342	ALOX12B	Arachidonate 12-lipoxygenase, 12R-type	O75342	LX12B_HUMAN	1408.66	336.548	563.652			dirDIA	P06899;P23527;P33778;Q16778;Q8N257	P06899;P23527;P33778;Q16778;Q8N257	HIST1H2BJ;HIST1H2BO;HIST1H2BB;HIST2H2BE;HIST3H2BB	Histone H2B type 1-J;Histone H2B type 1-O;Histone H2B type 1-B;Histone H2B type 2-E;Histone H2B type 3-B	P06899;P23527;P33778;Q16778;Q8N257	H2B1J_HUMAN;H2B1O_HUMAN;H2B1B_HUMAN;H2B2E_HUMAN;H2B3B_HUMAN	119569	82714.8	126318
libDIA-22xlib	O75489	O75489	NDUFS3	NADH dehydrogenase [ubiquinone] iron-sulfur protein 3, mitochondrial	O75489	NDUS3_HUMAN	Filtered	Filtered	Filtered			libDIA-6xlib	O75347	O75347	TBCA	Tubulin-specific chaperone A	O75347	TBCA_HUMAN	4651.62	7805.12	5509			dirDIA	P07099	P07099	EPHX1	Epoxide hydrolase 1	P07099	HYEP_HUMAN	Filtered	Filtered	Filtered
libDIA-22xlib	O75494	O75494	SRSF10	Serine/arginine-rich splicing factor 10	O75494	SRS10_HUMAN	Filtered	198.533	Filtered			libDIA-6xlib	O75351	O75351	VPS4B	Vacuolar protein sorting-associated protein 4B	O75351	VPS4B_HUMAN	Filtered	Filtered	Filtered			dirDIA	P07195	P07195	LDHB	L-lactate dehydrogenase B chain	P07195	LDHB_HUMAN	45095.4	44584.7	49204.8
libDIA-22xlib	O75531	O75531	BANF1	Barrier-to-autointegration factor	O75531	BAF_HUMAN	Filtered	Filtered	Filtered			libDIA-6xlib	O75367	O75367	H2AFY	Core histone macro-H2A.1	O75367	H2AY_HUMAN	2996.74	6057.39	4267.09			dirDIA	P07237	P07237	P4HB	Protein disulfide-isomerase	P07237	PDIA1_HUMAN	2732.22	4362.9	4544.37
libDIA-22xlib	O75533	O75533	SF3B1	Splicing factor 3B subunit 1	O75533	SF3B1_HUMAN	311.929	Filtered	0.81712			libDIA-6xlib	O75368	O75368	SH3BGRL	SH3 domain-binding glutamic acid-rich-like protein	O75368	SH3L1_HUMAN	Filtered	0.379692	Filtered			dirDIA	P07339	P07339	CTSD	Cathepsin D	P07339	CATD_HUMAN	3138.23	4449.79	3625.28
libDIA-22xlib	O75534	O75534	CSDE1	Cold shock domain-containing protein E1	O75534	CSDE1_HUMAN	2141.57	1411.46	Filtered			libDIA-6xlib	O75369	O75369	FLNB	Filamin-B	O75369	FLNB_HUMAN	14446	17273	17252			dirDIA	P07355	P07355	ANXA2	Annexin A2	P07355	ANXA2_HUMAN	65722.7	98120.6	92669
libDIA-22xlib	O75569	O75569	PRKRA	Interferon-inducible double-stranded RNA-dependent protein kinase activator A	O75569	PRKRA_HUMAN	Filtered	Filtered	0.412434			libDIA-6xlib	O75390	O75390	CS	Citrate synthase, mitochondrial	O75390	CISY_HUMAN	Filtered	Filtered	477.197			dirDIA	P07384	P07384	CAPN1	Calpain-1 catalytic subunit	P07384	CAN1_HUMAN	1638.48	2490.45	2298.27
libDIA-22xlib	O75608	O75608	LYPLA1	Acyl-protein thioesterase 1	O75608	LYPA1_HUMAN	Filtered	1452.35	Filtered			libDIA-6xlib	O75396	O75396	SEC22B	Vesicle-trafficking protein SEC22b	O75396	SC22B_HUMAN	Filtered	Filtered	Filtered			dirDIA	P07437	P07437	TUBB	Tubulin beta chain	P07437	TBB5_HUMAN	58673.7	73265.8	57826
libDIA-22xlib	O75643	O75643	SNRNP200	U5 small nuclear ribonucleoprotein 200 kDa helicase	O75643	U520_HUMAN	Filtered	Filtered	Filtered			libDIA-6xlib	O75400	O75400	PRPF40A	Pre-mRNA-processing factor 40 homolog A	O75400	PR40A_HUMAN	Filtered	Filtered	Filtered			dirDIA	P07477;P07478;Q8NHM4	P07477;P07478;Q8NHM4	PRSS1;PRSS2;PRSS3P2	Trypsin-1;Trypsin-2;Putative trypsin-6	P07477;P07478;Q8NHM4	TRY1_HUMAN;TRY2_HUMAN;TRY6_HUMAN	193092	163599	274614
libDIA-22xlib	O75821	O75821	EIF3G	Eukaryotic translation initiation factor 3 subunit G	O75821	EIF3G_HUMAN	832.294	1256.77	1240.69			libDIA-6xlib	O75436	O75436	VPS26A	Vacuolar protein sorting-associated protein 26A	O75436	VP26A_HUMAN	Filtered	Filtered	3125.37			dirDIA	P07737	P07737	PFN1	Profilin-1	P07737	PROF1_HUMAN	69920.2	93612.7	79274.4
libDIA-22xlib	O75822	O75822	EIF3J	Eukaryotic translation initiation factor 3 subunit J	O75822	EIF3J_HUMAN	3080.7	2737.06	2273.99			libDIA-6xlib	O75439	O75439	PMPCB	Mitochondrial-processing peptidase subunit beta	O75439	MPPB_HUMAN	Filtered	Filtered	Filtered			dirDIA	P07741	P07741	APRT	Adenine phosphoribosyltransferase	P07741	APT_HUMAN	Filtered	1238.54	757.131
libDIA-22xlib	O75832	O75832	PSMD10	26S proteasome non-ATPase regulatory subunit 10	O75832	PSD10_HUMAN	Filtered	Filtered	Filtered			libDIA-6xlib	O75477	O75477	ERLIN1	Erlin-1	O75477	ERLN1_HUMAN	Filtered	Filtered	Filtered			dirDIA	P07814	P07814	EPRS	Bifunctional glutamate/proline--tRNA ligase	P07814	SYEP_HUMAN	318.848	431.076	786.531
libDIA-22xlib	O75844	O75844	ZMPSTE24	CAAX prenyl protease 1 homolog	O75844	FACE1_HUMAN	Filtered	Filtered	Filtered			libDIA-6xlib	O75489	O75489	NDUFS3	NADH dehydrogenase [ubiquinone] iron-sulfur protein 3, mitochondrial	O75489	NDUS3_HUMAN	Filtered	Filtered	Filtered			dirDIA	P07900	P07900	HSP90AA1	Heat shock protein HSP 90-alpha	P07900	HS90A_HUMAN	73894.3	90906.9	103993
libDIA-22xlib	O75874	O75874	IDH1	Isocitrate dehydrogenase [NADP] cytoplasmic	O75874	IDHC_HUMAN	2111.48	Filtered	2604.36			libDIA-6xlib	O75494	O75494	SRSF10	Serine/arginine-rich splicing factor 10	O75494	SRS10_HUMAN	Filtered	Filtered	Filtered			dirDIA	P07910	P07910	HNRNPC	Heterogeneous nuclear ribonucleoproteins C1/C2	P07910	HNRPC_HUMAN	17446.1	15430.5	19254.4
libDIA-22xlib	O75891;Q3SY69	O75891;Q3SY69	ALDH1L1;ALDH1L2	Cytosolic 10-formyltetrahydrofolate dehydrogenase;Mitochondrial 10-formyltetrahydrofolate dehydrogenase	O75891;Q3SY69	AL1L1_HUMAN;AL1L2_HUMAN	Filtered	Filtered	Filtered			libDIA-6xlib	O75506	O75506	HSBP1	Heat shock factor-binding protein 1	O75506	HSBP1_HUMAN	Filtered	Filtered	Filtered			dirDIA	P07951	P07951	TPM2	Tropomyosin beta chain	P07951	TPM2_HUMAN	23737.4	40058.4	57029.1
libDIA-22xlib	O75935	O75935	DCTN3	Dynactin subunit 3	O75935	DCTN3_HUMAN	Filtered	Filtered	Filtered			libDIA-6xlib	O75531	O75531	BANF1	Barrier-to-autointegration factor	O75531	BAF_HUMAN	921.727	Filtered	1069.7			dirDIA	P07954	P07954	FH	Fumarate hydratase, mitochondrial	P07954	FUMH_HUMAN	0.614811	663.267	1410.08
libDIA-22xlib	O75947	O75947	ATP5H	ATP synthase subunit d, mitochondrial	O75947	ATP5H_HUMAN	Filtered	0.919178	Filtered			libDIA-6xlib	O75533	O75533	SF3B1	Splicing factor 3B subunit 1	O75533	SF3B1_HUMAN	623.207	Filtered	Filtered			dirDIA	P08195	P08195	SLC3A2	4F2 cell-surface antigen heavy chain	P08195	4F2_HUMAN	5033.02	4261.23	5170.17
libDIA-22xlib	O75964	O75964	ATP5L	ATP synthase subunit g, mitochondrial	O75964	ATP5L_HUMAN	Filtered	Filtered	Filtered			libDIA-6xlib	O75534	O75534	CSDE1	Cold shock domain-containing protein E1	O75534	CSDE1_HUMAN	2443.15	1990.37	2124.42			dirDIA	P08238	P08238	HSP90AB1	Heat shock protein HSP 90-beta	P08238	HS90B_HUMAN	166480	189338	225259
libDIA-22xlib	O76003	O76003	GLRX3	Glutaredoxin-3	O76003	GLRX3_HUMAN	2767.01	Filtered	2532.47			libDIA-6xlib	O75569	O75569	PRKRA	Interferon-inducible double-stranded RNA-dependent protein kinase activator A	O75569	PRKRA_HUMAN	Filtered	Filtered	Filtered			dirDIA	P08621	P08621	SNRNP70	U1 small nuclear ribonucleoprotein 70 kDa	P08621	RU17_HUMAN	Filtered	2216.16	1666.34
libDIA-22xlib	O76013	O76013	KRT36	Keratin, type I cuticular Ha6	O76013	KRT36_HUMAN	5167.96	Filtered	Filtered			libDIA-6xlib	O75608	O75608	LYPLA1	Acyl-protein thioesterase 1	O75608	LYPA1_HUMAN	576.336	2083.19	1047.37			dirDIA	P08670	P08670	VIM	Vimentin	P08670	VIME_HUMAN	2023.04	1984.74	707.063
libDIA-22xlib	O76021	O76021	RSL1D1	Ribosomal L1 domain-containing protein 1	O76021	RL1D1_HUMAN	1361.83	490.624	1015.22			libDIA-6xlib	O75643	O75643	SNRNP200	U5 small nuclear ribonucleoprotein 200 kDa helicase	O75643	U520_HUMAN	Filtered	271.617	Filtered			dirDIA	P08727	P08727	KRT19	Keratin, type I cytoskeletal 19	P08727	K1C19_HUMAN	138363	237880	153319
libDIA-22xlib	O76094	O76094	SRP72	Signal recognition particle subunit SRP72	O76094	SRP72_HUMAN	Filtered	0.574413	Filtered			libDIA-6xlib	O75694	O75694	NUP155	Nuclear pore complex protein Nup155	O75694	NU155_HUMAN	Filtered	Filtered	Filtered			dirDIA	P08729	P08729	KRT7	Keratin, type II cytoskeletal 7	P08729	K2C7_HUMAN	64495.2	70836.9	59173.4
libDIA-22xlib	O94760	O94760	DDAH1	N(G),N(G)-dimethylarginine dimethylaminohydrolase 1	O94760	DDAH1_HUMAN	Filtered	0.963615	Filtered			libDIA-6xlib	O75821	O75821	EIF3G	Eukaryotic translation initiation factor 3 subunit G	O75821	EIF3G_HUMAN	1483.21	2404.07	2229.48			dirDIA	P08758	P08758	ANXA5	Annexin A5	P08758	ANXA5_HUMAN	26741.6	25541.6	32979.5
libDIA-22xlib	O94776	O94776	MTA2	Metastasis-associated protein MTA2	O94776	MTA2_HUMAN	Filtered	Filtered	Filtered			libDIA-6xlib	O75822	O75822	EIF3J	Eukaryotic translation initiation factor 3 subunit J	O75822	EIF3J_HUMAN	3180.11	4159.93	3075.13			dirDIA	P08779	P08779	KRT16	Keratin, type I cytoskeletal 16	P08779	K1C16_HUMAN	Filtered	597.659	Filtered
libDIA-22xlib	O94826	O94826	TOMM70A	Mitochondrial import receptor subunit TOM70	O94826	TOM70_HUMAN	Filtered	Filtered	Filtered			libDIA-6xlib	O75832	O75832	PSMD10	26S proteasome non-ATPase regulatory subunit 10	O75832	PSD10_HUMAN	0.468498	Filtered	Filtered			dirDIA	P08865	P08865	RPSA	40S ribosomal protein SA	P08865	RSSA_HUMAN	21714.9	31252.6	34748.9
libDIA-22xlib	O94874	O94874	UFL1	E3 UFM1-protein ligase 1	O94874	UFL1_HUMAN	Filtered	Filtered	Filtered			libDIA-6xlib	O75844	O75844	ZMPSTE24	CAAX prenyl protease 1 homolog	O75844	FACE1_HUMAN	Filtered	Filtered	Filtered			dirDIA	P08962	P08962	CD63	CD63 antigen	P08962	CD63_HUMAN	1239.95	1216.15	Filtered
libDIA-22xlib	O94906	O94906	PRPF6	Pre-mRNA-processing factor 6	O94906	PRP6_HUMAN	Filtered	Filtered	Filtered			libDIA-6xlib	O75874	O75874	IDH1	Isocitrate dehydrogenase [NADP] cytoplasmic	O75874	IDHC_HUMAN	2111.48	1470.83	2545.22			dirDIA	P09012	P09012	SNRPA	U1 small nuclear ribonucleoprotein A	P09012	SNRPA_HUMAN	0.452133	0.602417	661.358
libDIA-22xlib	O94979	O94979	SEC31A	Protein transport protein Sec31A	O94979	SC31A_HUMAN	Filtered	Filtered	Filtered			libDIA-6xlib	O75937	O75937	DNAJC8	DnaJ homolog subfamily C member 8	O75937	DNJC8_HUMAN	Filtered	Filtered	Filtered			dirDIA	P09211	P09211	GSTP1	Glutathione S-transferase P	P09211	GSTP1_HUMAN	9925.32	10741.3	18020.7
libDIA-22xlib	O95168	O95168	NDUFB4	NADH dehydrogenase [ubiquinone] 1 beta subcomplex subunit 4	O95168	NDUB4_HUMAN	Filtered	Filtered	Filtered			libDIA-6xlib	O75947	O75947	ATP5H	ATP synthase subunit d, mitochondrial	O75947	ATP5H_HUMAN	Filtered	Filtered	Filtered			dirDIA	P09382	P09382	LGALS1	Galectin-1	P09382	LEG1_HUMAN	23008.9	23791.1	14992.4
libDIA-22xlib	O95197	O95197	RTN3	Reticulon-3	O95197	RTN3_HUMAN	2782.46	1719.41	4040.05			libDIA-6xlib	O75964	O75964	ATP5L	ATP synthase subunit g, mitochondrial	O75964	ATP5L_HUMAN	Filtered	Filtered	Filtered			dirDIA	P09429	P09429	HMGB1	High mobility group protein B1	P09429	HMGB1_HUMAN	5533.45	6946.14	11752.4
libDIA-22xlib	O95202	O95202	LETM1	LETM1 and EF-hand domain-containing protein 1, mitochondrial	O95202	LETM1_HUMAN	Filtered	Filtered	Filtered			libDIA-6xlib	O76003	O76003	GLRX3	Glutaredoxin-3	O76003	GLRX3_HUMAN	2447.51	2916.76	2038.95			dirDIA	P09525	P09525	ANXA4	Annexin A4	P09525	ANXA4_HUMAN	812.894	871.628	1557.19
libDIA-22xlib	O95292	O95292	VAPB	Vesicle-associated membrane protein-associated protein B/C	O95292	VAPB_HUMAN	Filtered	Filtered	Filtered			libDIA-6xlib	O76021	O76021	RSL1D1	Ribosomal L1 domain-containing protein 1	O76021	RL1D1_HUMAN	Filtered	388.681	Filtered			dirDIA	P09622	P09622	DLD	Dihydrolipoyl dehydrogenase, mitochondrial	P09622	DLDH_HUMAN	630.18	Filtered	260.009
libDIA-22xlib	O95336	O95336	PGLS	6-phosphogluconolactonase	O95336	6PGL_HUMAN	2671.96	2162.18	1208.22			libDIA-6xlib	O76031	O76031	CLPX	ATP-dependent Clp protease ATP-binding subunit clpX-like, mitochondrial	O76031	CLPX_HUMAN	Filtered	Filtered	Filtered			dirDIA	P09651;Q32P51	P09651;Q32P51	HNRNPA1;HNRNPA1L2	Heterogeneous nuclear ribonucleoprotein A1;Heterogeneous nuclear ribonucleoprotein A1-like 2	P09651;Q32P51	ROA1_HUMAN;RA1L2_HUMAN	16970.6	20675.2	18357
libDIA-22xlib	O95342	O95342	ABCB11	Bile salt export pump	O95342	ABCBB_HUMAN	2248.76	4114.36	35295.4			libDIA-6xlib	O76094	O76094	SRP72	Signal recognition particle subunit SRP72	O76094	SRP72_HUMAN	Filtered	0.574402	Filtered			dirDIA	P09669	P09669	COX6C	Cytochrome c oxidase subunit 6C	P09669	COX6C_HUMAN	1078.18	989.062	917.237
libDIA-22xlib	O95347	O95347	SMC2	Structural maintenance of chromosomes protein 2	O95347	SMC2_HUMAN	Filtered	Filtered	Filtered			libDIA-6xlib	O94760	O94760	DDAH1	N(G),N(G)-dimethylarginine dimethylaminohydrolase 1	O94760	DDAH1_HUMAN	Filtered	Filtered	Filtered			dirDIA	P09874	P09874	PARP1	Poly [ADP-ribose] polymerase 1	P09874	PARP1_HUMAN	1939.44	2029.9	3308.02
libDIA-22xlib	O95373	O95373	IPO7	Importin-7	O95373	IPO7_HUMAN	Filtered	Filtered	Filtered			libDIA-6xlib	O94776	O94776	MTA2	Metastasis-associated protein MTA2	O94776	MTA2_HUMAN	Filtered	Filtered	Filtered			dirDIA	P09936	P09936	UCHL1	Ubiquitin carboxyl-terminal hydrolase isozyme L1	P09936	UCHL1_HUMAN	16658	15645.8	15839.4
libDIA-22xlib	O95394	O95394	PGM3	Phosphoacetylglucosamine mutase	O95394	AGM1_HUMAN	Filtered	Filtered	Filtered			libDIA-6xlib	O94826	O94826	TOMM70A	Mitochondrial import receptor subunit TOM70	O94826	TOM70_HUMAN	Filtered	Filtered	Filtered			dirDIA	P09960	P09960	LTA4H	Leukotriene A-4 hydrolase	P09960	LKHA4_HUMAN	Filtered	Filtered	Filtered
libDIA-22xlib	O95433	O95433	AHSA1	Activator of 90 kDa heat shock protein ATPase homolog 1	O95433	AHSA1_HUMAN	6292.28	12434	11602.4			libDIA-6xlib	O94906	O94906	PRPF6	Pre-mRNA-processing factor 6	O94906	PRP6_HUMAN	Filtered	Filtered	Filtered			dirDIA	P0C0S5;Q71UI9	P0C0S5;Q71UI9	H2AFZ;H2AFV	Histone H2A.Z;Histone H2A.V	P0C0S5;Q71UI9	H2AZ_HUMAN;H2AV_HUMAN	3171.63	3303.33	5569.76
libDIA-22xlib	O95571	O95571	ETHE1	Persulfide dioxygenase ETHE1, mitochondrial	O95571	ETHE1_HUMAN	Filtered	Filtered	Filtered			libDIA-6xlib	O94925	O94925	GLS	Glutaminase kidney isoform, mitochondrial	O94925	GLSK_HUMAN	Filtered	Filtered	Filtered			dirDIA	P0CG47;P0CG48;P62979;P62987	P0CG47;P0CG48;P62979;P62987	UBB;UBC;RPS27A;UBA52	Polyubiquitin-B;Polyubiquitin-C;Ubiquitin-40S ribosomal protein S27a;Ubiquitin-60S ribosomal protein L40	P0CG47;P0CG48;P62979;P62987	UBB_HUMAN;UBC_HUMAN;RS27A_HUMAN;RL40_HUMAN	34238.6	38765.8	35795.9
libDIA-22xlib	O95573	O95573	ACSL3	Long-chain-fatty-acid--CoA ligase 3	O95573	ACSL3_HUMAN	Filtered	573.113	Filtered			libDIA-6xlib	O94979	O94979	SEC31A	Protein transport protein Sec31A	O94979	SC31A_HUMAN	Filtered	Filtered	Filtered			dirDIA	P0DMV8;P0DMV9	P0DMV8;P0DMV9	HSPA1A;HSPA1B	Heat shock 70 kDa protein 1A;Heat shock 70 kDa protein 1B	P0DMV8;P0DMV9	HS71A_HUMAN;HS71B_HUMAN	49628.6	53448.9	61632.4
libDIA-22xlib	O95716;P20336;P20337;P51153;P61006;Q92930;Q96E17	O95716;P20336;P20337;P51153;P61006;Q92930;Q96E17	RAB3D;RAB3A;RAB3B;RAB13;RAB8A;RAB8B;RAB3C	Ras-related protein Rab-3D;Ras-related protein Rab-3A;Ras-related protein Rab-3B;Ras-related protein Rab-13;Ras-related protein Rab-8A;Ras-related protein Rab-8B;Ras-related protein Rab-3C	O95716;P20336;P20337;P51153;P61006;Q92930;Q96E17	RAB3D_HUMAN;RAB3A_HUMAN;RAB3B_HUMAN;RAB13_HUMAN;RAB8A_HUMAN;RAB8B_HUMAN;RAB3C_HUMAN	Filtered	546.923	Filtered			libDIA-6xlib	O94992	O94992	HEXIM1	Protein HEXIM1	O94992	HEXI1_HUMAN	Filtered	Filtered	Filtered			dirDIA	P10412;P16402;P16403	P10412;P16402;P16403	HIST1H1E;HIST1H1D;HIST1H1C	Histone H1.4;Histone H1.3;Histone H1.2	P10412;P16402;P16403	H14_HUMAN;H13_HUMAN;H12_HUMAN	44689.9	36374.1	36144.7
libDIA-22xlib	O95747	O95747	OXSR1	Serine/threonine-protein kinase OSR1	O95747	OXSR1_HUMAN	2944.19	3061.08	2878.1			libDIA-6xlib	O95168	O95168	NDUFB4	NADH dehydrogenase [ubiquinone] 1 beta subcomplex subunit 4	O95168	NDUB4_HUMAN	Filtered	Filtered	Filtered			dirDIA	P10599	P10599	TXN	Thioredoxin	P10599	THIO_HUMAN	58805.7	85130.3	57607.8
libDIA-22xlib	O95793	O95793	STAU1	Double-stranded RNA-binding protein Staufen homolog 1	O95793	STAU1_HUMAN	Filtered	Filtered	Filtered			libDIA-6xlib	O95197	O95197	RTN3	Reticulon-3	O95197	RTN3_HUMAN	2782.71	3438.68	4040.3			dirDIA	P10606	P10606	COX5B	Cytochrome c oxidase subunit 5B, mitochondrial	P10606	COX5B_HUMAN	563.334	Filtered	1534.97
libDIA-22xlib	O95816	O95816	BAG2	BAG family molecular chaperone regulator 2	O95816	BAG2_HUMAN	Filtered	Filtered	Filtered			libDIA-6xlib	O95202	O95202	LETM1	LETM1 and EF-hand domain-containing protein 1, mitochondrial	O95202	LETM1_HUMAN	Filtered	Filtered	483.307			dirDIA	P10620	P10620	MGST1	Microsomal glutathione S-transferase 1	P10620	MGST1_HUMAN	3438.94	2469.83	2563.33
libDIA-22xlib	O95817	O95817	BAG3	BAG family molecular chaperone regulator 3	O95817	BAG3_HUMAN	Filtered	Filtered	Filtered			libDIA-6xlib	O95232	O95232	LUC7L3	Luc7-like protein 3	O95232	LC7L3_HUMAN	Filtered	Filtered	Filtered			dirDIA	P10809	P10809	HSPD1	60 kDa heat shock protein, mitochondrial	P10809	CH60_HUMAN	10550.5	12280.8	12026.2
libDIA-22xlib	O95831	O95831	AIFM1	Apoptosis-inducing factor 1, mitochondrial	O95831	AIFM1_HUMAN	Filtered	Filtered	0.593102			libDIA-6xlib	O95292	O95292	VAPB	Vesicle-associated membrane protein-associated protein B/C	O95292	VAPB_HUMAN	Filtered	Filtered	Filtered			dirDIA	P11021	P11021	HSPA5	78 kDa glucose-regulated protein	P11021	GRP78_HUMAN	6904.81	14282.2	11484.7
libDIA-22xlib	O95861	O95861	BPNT1	3'(2'),5'-bisphosphate nucleotidase 1	O95861	BPNT1_HUMAN	Filtered	Filtered	Filtered			libDIA-6xlib	O95299	O95299	NDUFA10	NADH dehydrogenase [ubiquinone] 1 alpha subcomplex subunit 10, mitochondrial	O95299	NDUAA_HUMAN	Filtered	Filtered	Filtered			dirDIA	P11142	P11142	HSPA8	Heat shock cognate 71 kDa protein	P11142	HSP7C_HUMAN	56238	79642.6	62702.3
libDIA-22xlib	O95881	O95881	TXNDC12	Thioredoxin domain-containing protein 12	O95881	TXD12_HUMAN	Filtered	Filtered	Filtered			libDIA-6xlib	O95302	O95302	FKBP9	Peptidyl-prolyl cis-trans isomerase FKBP9	O95302	FKBP9_HUMAN	Filtered	Filtered	Filtered			dirDIA	P11166	P11166	SLC2A1	Solute carrier family 2, facilitated glucose transporter member 1	P11166	GTR1_HUMAN	Filtered	1927.28	3273.44
libDIA-22xlib	O96000	O96000	NDUFB10	NADH dehydrogenase [ubiquinone] 1 beta subcomplex subunit 10	O96000	NDUBA_HUMAN	Filtered	Filtered	Filtered			libDIA-6xlib	O95336	O95336	PGLS	6-phosphogluconolactonase	O95336	6PGL_HUMAN	2367.02	2241.87	2638.66			dirDIA	P11216	P11216	PYGB	Glycogen phosphorylase, brain form	P11216	PYGB_HUMAN	2219.17	4433.36	6225.61
libDIA-22xlib	O96008	O96008	TOMM40	Mitochondrial import receptor subunit TOM40 homolog	O96008	TOM40_HUMAN	0.411209	Filtered	0.623354			libDIA-6xlib	O95340	O95340	PAPSS2	Bifunctional 3'-phosphoadenosine 5'-phosphosulfate synthase 2	O95340	PAPS2_HUMAN	Filtered	Filtered	Filtered			dirDIA	P11234	P11234	RALB	Ras-related protein Ral-B	P11234	RALB_HUMAN	Filtered	192.522	Filtered
libDIA-22xlib	O96019	O96019	ACTL6A	Actin-like protein 6A	O96019	ACL6A_HUMAN	0.440529	Filtered	Filtered			libDIA-6xlib	O95342	O95342	ABCB11	Bile salt export pump	O95342	ABCBB_HUMAN	4015.04	8504.09	58854.8			dirDIA	P11279	P11279	LAMP1	Lysosome-associated membrane glycoprotein 1	P11279	LAMP1_HUMAN	1760.88	4474.98	173.07
libDIA-22xlib	P00167	P00167	CYB5A	Cytochrome b5	P00167	CYB5_HUMAN	Filtered	Filtered	Filtered			libDIA-6xlib	O95347	O95347	SMC2	Structural maintenance of chromosomes protein 2	O95347	SMC2_HUMAN	Filtered	Filtered	Filtered			dirDIA	P11413	P11413	G6PD	Glucose-6-phosphate 1-dehydrogenase	P11413	G6PD_HUMAN	26385.6	32333.1	36131.1
libDIA-22xlib	P00338	P00338	LDHA	L-lactate dehydrogenase A chain	P00338	LDHA_HUMAN	84804.2	90425.4	84444.6			libDIA-6xlib	O95361	O95361	TRIM16	Tripartite motif-containing protein 16	O95361	TRI16_HUMAN	Filtered	251.565	1514.14			dirDIA	P11586	P11586	MTHFD1	C-1-tetrahydrofolate synthase, cytoplasmic	P11586	C1TC_HUMAN	5229.46	5390.31	6949.51
libDIA-22xlib	P00367;P49448	P00367;P49448	GLUD1;GLUD2	Glutamate dehydrogenase 1, mitochondrial;Glutamate dehydrogenase 2, mitochondrial	P00367;P49448	DHE3_HUMAN;DHE4_HUMAN	Filtered	Filtered	Filtered			libDIA-6xlib	O95373	O95373	IPO7	Importin-7	O95373	IPO7_HUMAN	Filtered	Filtered	Filtered			dirDIA	P11940	P11940	PABPC1	Polyadenylate-binding protein 1	P11940	PABP1_HUMAN	5687.98	10192.2	7834.47
libDIA-22xlib	P00387	P00387	CYB5R3	NADH-cytochrome b5 reductase 3	P00387	NB5R3_HUMAN	Filtered	206.153	Filtered			libDIA-6xlib	O95394	O95394	PGM3	Phosphoacetylglucosamine mutase	O95394	AGM1_HUMAN	Filtered	Filtered	Filtered			dirDIA	P12004	P12004	PCNA	Proliferating cell nuclear antigen	P12004	PCNA_HUMAN	2482.01	2299.17	2658.65
libDIA-22xlib	P00390	P00390	GSR	Glutathione reductase, mitochondrial	P00390	GSHR_HUMAN	772.184	2254.31	1063.23			libDIA-6xlib	O95400	O95400	CD2BP2	CD2 antigen cytoplasmic tail-binding protein 2	O95400	CD2B2_HUMAN	Filtered	Filtered	Filtered			dirDIA	P12081	P12081	HARS	Histidine--tRNA ligase, cytoplasmic	P12081	SYHC_HUMAN	707.675	1577.96	1153.41
libDIA-22xlib	P00403	P00403	MT-CO2	Cytochrome c oxidase subunit 2	P00403	COX2_HUMAN	7917	16940.5	8219.2			libDIA-6xlib	O95433	O95433	AHSA1	Activator of 90 kDa heat shock protein ATPase homolog 1	O95433	AHSA1_HUMAN	7191.4	12434	11602.4			dirDIA	P12236	P12236	SLC25A6	ADP/ATP translocase 3	P12236	ADT3_HUMAN	8995.35	6805.32	6540.48
libDIA-22xlib	P00441	P00441	SOD1	Superoxide dismutase [Cu-Zn]	P00441	SODC_HUMAN	1247.99	943.623	2032.62			libDIA-6xlib	O95470	O95470	SGPL1	Sphingosine-1-phosphate lyase 1	O95470	SGPL1_HUMAN	Filtered	Filtered	Filtered			dirDIA	P12429	P12429	ANXA3	Annexin A3	P12429	ANXA3_HUMAN	7473.25	7999.33	7479.95
libDIA-22xlib	P00491	P00491	PNP	Purine nucleoside phosphorylase	P00491	PNPH_HUMAN	Filtered	Filtered	Filtered			libDIA-6xlib	O95571	O95571	ETHE1	Persulfide dioxygenase ETHE1, mitochondrial	O95571	ETHE1_HUMAN	Filtered	Filtered	Filtered			dirDIA	P12814	P12814	ACTN1	Alpha-actinin-1	P12814	ACTN1_HUMAN	12047.4	13084.1	14664.9
libDIA-22xlib	P00492	P00492	HPRT1	Hypoxanthine-guanine phosphoribosyltransferase	P00492	HPRT_HUMAN	Filtered	Filtered	2245.51			libDIA-6xlib	O95573	O95573	ACSL3	Long-chain-fatty-acid--CoA ligase 3	O95573	ACSL3_HUMAN	Filtered	455.762	Filtered			dirDIA	P12956	P12956	XRCC6	X-ray repair cross-complementing protein 6	P12956	XRCC6_HUMAN	3384.17	4534.65	6557.58
libDIA-22xlib	P00505	P00505	GOT2	Aspartate aminotransferase, mitochondrial	P00505	AATM_HUMAN	2997.1	3467.25	1873.35			libDIA-6xlib	O95747	O95747	OXSR1	Serine/threonine-protein kinase OSR1	O95747	OXSR1_HUMAN	2944.11	3061.08	2878.1			dirDIA	P13010	P13010	XRCC5	X-ray repair cross-complementing protein 5	P13010	XRCC5_HUMAN	5972.51	7314.06	7476.5
libDIA-22xlib	P00533	P00533	EGFR	Epidermal growth factor receptor	P00533	EGFR_HUMAN	Filtered	Filtered	Filtered			libDIA-6xlib	O95793	O95793	STAU1	Double-stranded RNA-binding protein Staufen homolog 1	O95793	STAU1_HUMAN	Filtered	Filtered	Filtered			dirDIA	P13073	P13073	COX4I1	Cytochrome c oxidase subunit 4 isoform 1, mitochondrial	P13073	COX41_HUMAN	0.855186	475.783	1121.47
libDIA-22xlib	P00558	P00558	PGK1	Phosphoglycerate kinase 1	P00558	PGK1_HUMAN	8491.12	9757.76	10533.5			libDIA-6xlib	O95816	O95816	BAG2	BAG family molecular chaperone regulator 2	O95816	BAG2_HUMAN	168.313	Filtered	Filtered			dirDIA	P13489	P13489	RNH1	Ribonuclease inhibitor	P13489	RINI_HUMAN	1022.96	1864.32	2554.4
libDIA-22xlib	P00568	P00568	AK1	Adenylate kinase isoenzyme 1	P00568	KAD1_HUMAN	Filtered	3279.98	3171.68			libDIA-6xlib	O95817	O95817	BAG3	BAG family molecular chaperone regulator 3	O95817	BAG3_HUMAN	Filtered	1774.05	Filtered			dirDIA	P13639	P13639	EEF2	Elongation factor 2	P13639	EF2_HUMAN	32005.4	37403.8	38988
libDIA-22xlib	P00966	P00966	ASS1	Argininosuccinate synthase	P00966	ASSY_HUMAN	Filtered	Filtered	Filtered			libDIA-6xlib	O95831	O95831	AIFM1	Apoptosis-inducing factor 1, mitochondrial	O95831	AIFM1_HUMAN	Filtered	Filtered	Filtered			dirDIA	P13645	P13645	KRT10	Keratin, type I cytoskeletal 10	P13645	K1C10_HUMAN	291807	810286	967846
libDIA-22xlib	P01008	P01008	SERPINC1	Antithrombin-III	P01008	ANT3_HUMAN	18524.7	24184.8	25681.3			libDIA-6xlib	O95861	O95861	BPNT1	3'(2'),5'-bisphosphate nucleotidase 1	O95861	BPNT1_HUMAN	Filtered	Filtered	Filtered			dirDIA	P13646	P13646	KRT13	Keratin, type I cytoskeletal 13	P13646	K1C13_HUMAN	57836.7	155688	182376
libDIA-22xlib	P01023	P01023	A2M	Alpha-2-macroglobulin	P01023	A2MG_HUMAN	52280.9	40454.8	Filtered			libDIA-6xlib	O95881	O95881	TXNDC12	Thioredoxin domain-containing protein 12	O95881	TXD12_HUMAN	Filtered	204.731	Filtered			dirDIA	P13647	P13647	KRT5	Keratin, type II cytoskeletal 5	P13647	K2C5_HUMAN	25250.3	75717.9	53999.6
libDIA-22xlib	P01024	P01024	C3	Complement C3	P01024	CO3_HUMAN	Filtered	Filtered	Filtered			libDIA-6xlib	O96000	O96000	NDUFB10	NADH dehydrogenase [ubiquinone] 1 beta subcomplex subunit 10	O96000	NDUBA_HUMAN	Filtered	Filtered	Filtered			dirDIA	P13667	P13667	PDIA4	Protein disulfide-isomerase A4	P13667	PDIA4_HUMAN	1489.85	2103.53	859.643
libDIA-22xlib	P01040	P01040	CSTA	Cystatin-A	P01040	CYTA_HUMAN	3771.26	7460.82	5668.98			libDIA-6xlib	O96008	O96008	TOMM40	Mitochondrial import receptor subunit TOM40 homolog	O96008	TOM40_HUMAN	Filtered	Filtered	Filtered			dirDIA	P13693	P13693	TPT1	Translationally-controlled tumor protein	P13693	TCTP_HUMAN	0.720537	0.777712	Filtered
libDIA-22xlib	P01111;P01112;P01116	P01111;P01112;P01116	NRAS;HRAS;KRAS	GTPase NRas;GTPase HRas;GTPase KRas	P01111;P01112;P01116	RASN_HUMAN;RASH_HUMAN;RASK_HUMAN	Filtered	7584.13	Filtered			libDIA-6xlib	O96019	O96019	ACTL6A	Actin-like protein 6A	O96019	ACL6A_HUMAN	Filtered	3653.55	Filtered			dirDIA	P13796	P13796	LCP1	Plastin-2	P13796	PLSL_HUMAN	9013.55	11205.1	14511.8
libDIA-22xlib	P01857	P01857	IGHG1	Ig gamma-1 chain C region	P01857	IGHG1_HUMAN	Filtered	1827	Filtered			libDIA-6xlib	P00167	P00167	CYB5A	Cytochrome b5	P00167	CYB5_HUMAN	Filtered	Filtered	Filtered			dirDIA	P13797	P13797	PLS3	Plastin-3	P13797	PLST_HUMAN	9158.54	12351.3	13501.1
libDIA-22xlib	P02533	P02533	KRT14	Keratin, type I cytoskeletal 14	P02533	K1C14_HUMAN	7398.36	59589.1	32363.7			libDIA-6xlib	P00338	P00338	LDHA	L-lactate dehydrogenase A chain	P00338	LDHA_HUMAN	85770.8	90672.5	84679			dirDIA	P13798	P13798	APEH	Acylamino-acid-releasing enzyme	P13798	ACPH_HUMAN	Filtered	Filtered	Filtered
libDIA-22xlib	P02538	P02538	KRT6A	Keratin, type II cytoskeletal 6A	P02538	K2C6A_HUMAN	59632.7	148165	240103			libDIA-6xlib	P00367	P00367	GLUD1	Glutamate dehydrogenase 1, mitochondrial	P00367	DHE3_HUMAN	Filtered	Filtered	Filtered			dirDIA	P13804	P13804	ETFA	Electron transfer flavoprotein subunit alpha, mitochondrial	P13804	ETFA_HUMAN	417.137	1902.68	627.173
libDIA-22xlib	P02545	P02545	LMNA	Prelamin-A/C	P02545	LMNA_HUMAN	17946.3	16542.6	11651.1			libDIA-6xlib	P00387	P00387	CYB5R3	NADH-cytochrome b5 reductase 3	P00387	NB5R3_HUMAN	Filtered	Filtered	190.157			dirDIA	P13861	P13861	PRKAR2A	cAMP-dependent protein kinase type II-alpha regulatory subunit	P13861	KAP2_HUMAN	Filtered	1112.44	Filtered
libDIA-22xlib	P02656	P02656	APOC3	Apolipoprotein C-III	P02656	APOC3_HUMAN	9334.66	11365.5	5573.71			libDIA-6xlib	P00390	P00390	GSR	Glutathione reductase, mitochondrial	P00390	GSHR_HUMAN	772.507	1291.17	1264.98			dirDIA	P13928;Q5VT79	P13928;Q5VT79	ANXA8;ANXA8L1	Annexin A8;Annexin A8-like protein 1	P13928;Q5VT79	ANXA8_HUMAN;AXA81_HUMAN	356.721	1287.17	1117.52
libDIA-22xlib	P02768	P02768	ALB	Serum albumin	P02768	ALBU_HUMAN	44481300	55954652	51265828			libDIA-6xlib	P00403	P00403	MT-CO2	Cytochrome c oxidase subunit 2	P00403	COX2_HUMAN	7916.97	16926.1	8219.13			dirDIA	P14314	P14314	PRKCSH	Glucosidase 2 subunit beta	P14314	GLU2B_HUMAN	0.554611	513.183	314.943
libDIA-22xlib	P02786	P02786	TFRC	Transferrin receptor protein 1	P02786	TFR1_HUMAN	3299.45	1073	1512.08			libDIA-6xlib	P00441	P00441	SOD1	Superoxide dismutase [Cu-Zn]	P00441	SODC_HUMAN	1248.04	943.669	2032.62			dirDIA	P14324	P14324	FDPS	Farnesyl pyrophosphate synthase	P14324	FPPS_HUMAN	Filtered	Filtered	Filtered
libDIA-22xlib	P02788	P02788	LTF	Lactotransferrin	P02788	TRFL_HUMAN	11586.9	12822.6	11204.1			libDIA-6xlib	P00491	P00491	PNP	Purine nucleoside phosphorylase	P00491	PNPH_HUMAN	Filtered	Filtered	Filtered			dirDIA	P14406	P14406	COX7A2	Cytochrome c oxidase subunit 7A2, mitochondrial	P14406	CX7A2_HUMAN	4262.66	4945.62	2291.08
libDIA-22xlib	P04040	P04040	CAT	Catalase	P04040	CATA_HUMAN	Filtered	2706.51	4158.25			libDIA-6xlib	P00492	P00492	HPRT1	Hypoxanthine-guanine phosphoribosyltransferase	P00492	HPRT_HUMAN	Filtered	2174.44	2500.44			dirDIA	P14550	P14550	AKR1A1	Alcohol dehydrogenase [NADP(+)]	P14550	AK1A1_HUMAN	Filtered	Filtered	Filtered
libDIA-22xlib	P04075	P04075	ALDOA	Fructose-bisphosphate aldolase A	P04075	ALDOA_HUMAN	74450.9	73710.8	64679.3			libDIA-6xlib	P00505	P00505	GOT2	Aspartate aminotransferase, mitochondrial	P00505	AATM_HUMAN	3065.76	3470.51	1758.24			dirDIA	P14618	P14618	PKM	Pyruvate kinase PKM	P14618	KPYM_HUMAN	119729	155958	173770
libDIA-22xlib	P04080	P04080	CSTB	Cystatin-B	P04080	CYTB_HUMAN	6666.83	10531.7	5243.59			libDIA-6xlib	P00533	P00533	EGFR	Epidermal growth factor receptor	P00533	EGFR_HUMAN	Filtered	Filtered	Filtered			dirDIA	P14625	P14625	HSP90B1	Endoplasmin	P14625	ENPL_HUMAN	8435.06	13766.3	11067
libDIA-22xlib	P04083	P04083	ANXA1	Annexin A1	P04083	ANXA1_HUMAN	26338.2	24930.4	30513.7			libDIA-6xlib	P00558	P00558	PGK1	Phosphoglycerate kinase 1	P00558	PGK1_HUMAN	8942.16	10204.4	11238.2			dirDIA	P14678;P63162	P14678;P63162	SNRPB;SNRPN	Small nuclear ribonucleoprotein-associated proteins B and B';Small nuclear ribonucleoprotein-associated protein N	P14678;P63162	RSMB_HUMAN;RSMN_HUMAN	1091.09	1281.3	768.038
libDIA-22xlib	P04179	P04179	SOD2	Superoxide dismutase [Mn], mitochondrial	P04179	SODM_HUMAN	Filtered	Filtered	Filtered			libDIA-6xlib	P00568	P00568	AK1	Adenylate kinase isoenzyme 1	P00568	KAD1_HUMAN	2854.65	3210.19	12878.5			dirDIA	P14866	P14866	HNRNPL	Heterogeneous nuclear ribonucleoprotein L	P14866	HNRPL_HUMAN	1191.44	722.249	960.797
libDIA-22xlib	P04181	P04181	OAT	Ornithine aminotransferase, mitochondrial	P04181	OAT_HUMAN	3084.24	1707.43	1070			libDIA-6xlib	P00966	P00966	ASS1	Argininosuccinate synthase	P00966	ASSY_HUMAN	2237.67	2642.34	1771.39			dirDIA	P14868	P14868	DARS	Aspartate--tRNA ligase, cytoplasmic	P14868	SYDC_HUMAN	751.91	1760.18	1640.2
libDIA-22xlib	P04259	P04259	KRT6B	Keratin, type II cytoskeletal 6B	P04259	K2C6B_HUMAN	573382	882808	488301			libDIA-6xlib	P01008	P01008	SERPINC1	Antithrombin-III	P01008	ANT3_HUMAN	23221.6	30636.7	31757.5			dirDIA	P14923	P14923	JUP	Junction plakoglobin	P14923	PLAK_HUMAN	0.609283	4565.22	299.596
libDIA-22xlib	P04264	P04264	KRT1	Keratin, type II cytoskeletal 1	P04264	K2C1_HUMAN	252116	920197	253001			libDIA-6xlib	P01024	P01024	C3	Complement C3	P01024	CO3_HUMAN	Filtered	Filtered	Filtered			dirDIA	P15121	P15121	AKR1B1	Aldose reductase	P15121	ALDR_HUMAN	53568.4	41609.9	29439.3
libDIA-22xlib	P04406	P04406	GAPDH	Glyceraldehyde-3-phosphate dehydrogenase	P04406	G3P_HUMAN	33029.5	43710.3	30715.3			libDIA-6xlib	P01040	P01040	CSTA	Cystatin-A	P01040	CYTA_HUMAN	3715.93	7460.82	5669			dirDIA	P15144	P15144	ANPEP	Aminopeptidase N	P15144	AMPN_HUMAN	Filtered	0.471405	Filtered
libDIA-22xlib	P04632	P04632	CAPNS1	Calpain small subunit 1	P04632	CPNS1_HUMAN	1490.56	3262.96	2208.46			libDIA-6xlib	P01111;P01112;P01116	P01111;P01112;P01116	NRAS;HRAS;KRAS	GTPase NRas;GTPase HRas;GTPase KRas	P01111;P01112;P01116	RASN_HUMAN;RASH_HUMAN;RASK_HUMAN	Filtered	Filtered	Filtered			dirDIA	P15259;P18669	P15259;P18669	PGAM2;PGAM1	Phosphoglycerate mutase 2;Phosphoglycerate mutase 1	P15259;P18669	PGAM2_HUMAN;PGAM1_HUMAN	232.533	1188.09	650.638
libDIA-22xlib	P04637	P04637	TP53	Cellular tumor antigen p53	P04637	P53_HUMAN	Filtered	1.07782	2537.43			libDIA-6xlib	P02533	P02533	KRT14	Keratin, type I cytoskeletal 14	P02533	K1C14_HUMAN	11011.6	74484.3	28753.3			dirDIA	P15311	P15311	EZR	Ezrin	P15311	EZRI_HUMAN	20402.7	34567.2	45114.3
libDIA-22xlib	P04792	P04792	HSPB1	Heat shock protein beta-1	P04792	HSPB1_HUMAN	4112.66	5251.19	6724.57			libDIA-6xlib	P02538	P02538	KRT6A	Keratin, type II cytoskeletal 6A	P02538	K2C6A_HUMAN	91539	202398	263704			dirDIA	P15374	P15374	UCHL3	Ubiquitin carboxyl-terminal hydrolase isozyme L3	P15374	UCHL3_HUMAN	1595.74	782.203	0.46645
libDIA-22xlib	P04843	P04843	RPN1	Dolichyl-diphosphooligosaccharide--protein glycosyltransferase subunit 1	P04843	RPN1_HUMAN	4890.45	2599.93	3243.51			libDIA-6xlib	P02545	P02545	LMNA	Prelamin-A/C	P02545	LMNA_HUMAN	18045.5	16626.3	11776.6			dirDIA	P15531	P15531	NME1	Nucleoside diphosphate kinase A	P15531	NDKA_HUMAN	8201.12	8612.22	7165.3
libDIA-22xlib	P04844	P04844	RPN2	Dolichyl-diphosphooligosaccharide--protein glycosyltransferase subunit 2	P04844	RPN2_HUMAN	3867.72	2000.09	Filtered			libDIA-6xlib	P02656	P02656	APOC3	Apolipoprotein C-III	P02656	APOC3_HUMAN	10539.2	13061.1	6436.69			dirDIA	P15559	P15559	NQO1	NAD(P)H dehydrogenase [quinone] 1	P15559	NQO1_HUMAN	3009.02	5997.06	5697.04
libDIA-22xlib	P04899	P04899	GNAI2	Guanine nucleotide-binding protein G(i) subunit alpha-2	P04899	GNAI2_HUMAN	Filtered	Filtered	Filtered			libDIA-6xlib	P02768	P02768	ALB	Serum albumin	P02768	ALBU_HUMAN	44481300	55954652	51265828			dirDIA	P15880	P15880	RPS2	40S ribosomal protein S2	P15880	RS2_HUMAN	5782.7	12638	13077.7
libDIA-22xlib	P04908;P0C0S8;P20671;Q16777;Q6FI13;Q7L7L0;Q93077;Q96KK5;Q99878;Q9BTM1	P04908;P0C0S8;P20671;Q16777;Q6FI13;Q7L7L0;Q93077;Q96KK5;Q99878;Q9BTM1	HIST1H2AB;HIST1H2AG;HIST1H2AD;HIST2H2AC;HIST2H2AA3;HIST3H2A;HIST1H2AC;HIST1H2AH;HIST1H2AJ;H2AFJ	Histone H2A type 1-B/E;Histone H2A type 1;Histone H2A type 1-D;Histone H2A type 2-C;Histone H2A type 2-A;Histone H2A type 3;Histone H2A type 1-C;Histone H2A type 1-H;Histone H2A type 1-J;Histone H2A.J	P04908;P0C0S8;P20671;Q16777;Q6FI13;Q7L7L0;Q93077;Q96KK5;Q99878;Q9BTM1	H2A1B_HUMAN;H2A1_HUMAN;H2A1D_HUMAN;H2A2C_HUMAN;H2A2A_HUMAN;H2A3_HUMAN;H2A1C_HUMAN;H2A1H_HUMAN;H2A1J_HUMAN;H2AJ_HUMAN	3384.97	Filtered	3411.57			libDIA-6xlib	P02786	P02786	TFRC	Transferrin receptor protein 1	P02786	TFR1_HUMAN	2756.73	1187.95	1210			dirDIA	P15924	P15924	DSP	Desmoplakin	P15924	DESP_HUMAN	457.95	8413	1291.99
libDIA-22xlib	P05023	P05023	ATP1A1	Sodium/potassium-transporting ATPase subunit alpha-1	P05023	AT1A1_HUMAN	258.91	986.349	484.151			libDIA-6xlib	P02788	P02788	LTF	Lactotransferrin	P02788	TRFL_HUMAN	11997.6	13798	11477.9			dirDIA	P16070	P16070	CD44	CD44 antigen	P16070	CD44_HUMAN	7789.29	10729.8	9357.72
libDIA-22xlib	P05026	P05026	ATP1B1	Sodium/potassium-transporting ATPase subunit beta-1	P05026	AT1B1_HUMAN	Filtered	220.923	924.294			libDIA-6xlib	P04040	P04040	CAT	Catalase	P04040	CATA_HUMAN	531.843	2730.66	3395.15			dirDIA	P16144	P16144	ITGB4	Integrin beta-4	P16144	ITB4_HUMAN	Filtered	3699.41	5586.18
libDIA-22xlib	P05089	P05089	ARG1	Arginase-1	P05089	ARGI1_HUMAN	Filtered	3561.61	5731.07			libDIA-6xlib	P04075	P04075	ALDOA	Fructose-bisphosphate aldolase A	P04075	ALDOA_HUMAN	74690.7	73671.9	64499.3			dirDIA	P16401	P16401	HIST1H1B	Histone H1.5	P16401	H15_HUMAN	21324.7	21795.6	33962.2
libDIA-22xlib	P05091	P05091	ALDH2	Aldehyde dehydrogenase, mitochondrial	P05091	ALDH2_HUMAN	Filtered	Filtered	Filtered			libDIA-6xlib	P04080	P04080	CSTB	Cystatin-B	P04080	CYTB_HUMAN	5023.15	8243.25	4879.98			dirDIA	P16435	P16435	POR	NADPH--cytochrome P450 reductase	P16435	NCPR_HUMAN	Filtered	Filtered	Filtered
libDIA-22xlib	P05109	P05109	S100A8	Protein S100-A8	P05109	S10A8_HUMAN	Filtered	181.835	Filtered			libDIA-6xlib	P04083	P04083	ANXA1	Annexin A1	P04083	ANXA1_HUMAN	25383.3	23487.9	25273.8			dirDIA	P16949	P16949	STMN1	Stathmin	P16949	STMN1_HUMAN	4818.46	7237.24	7386.9
libDIA-22xlib	P05141	P05141	SLC25A5	ADP/ATP translocase 2	P05141	ADT2_HUMAN	9451.34	8878.87	6306.87			libDIA-6xlib	P04179	P04179	SOD2	Superoxide dismutase [Mn], mitochondrial	P04179	SODM_HUMAN	Filtered	Filtered	Filtered			dirDIA	P16989	P16989	YBX3	Y-box-binding protein 3	P16989	YBOX3_HUMAN	1650.48	2845.04	927.649
libDIA-22xlib	P05198	P05198	EIF2S1	Eukaryotic translation initiation factor 2 subunit 1	P05198	IF2A_HUMAN	3712.59	4671.63	7072.97			libDIA-6xlib	P04181	P04181	OAT	Ornithine aminotransferase, mitochondrial	P04181	OAT_HUMAN	3084.16	2218.99	1353.16			dirDIA	P17096	P17096	HMGA1	High mobility group protein HMG-I/HMG-Y	P17096	HMGA1_HUMAN	9339.18	12107.7	21148.7
libDIA-22xlib	P05387	P05387	RPLP2	60S acidic ribosomal protein P2	P05387	RLA2_HUMAN	19112.3	23131.5	18439.9			libDIA-6xlib	P04259	P04259	KRT6B	Keratin, type II cytoskeletal 6B	P04259	K2C6B_HUMAN	Filtered	Filtered	Filtered			dirDIA	P17301	P17301	ITGA2	Integrin alpha-2	P17301	ITA2_HUMAN	Filtered	845.738	Filtered
libDIA-22xlib	P05388	P05388	RPLP0	60S acidic ribosomal protein P0	P05388	RLA0_HUMAN	8809.87	14000.5	10092.2			libDIA-6xlib	P04264	P04264	KRT1	Keratin, type II cytoskeletal 1	P04264	K2C1_HUMAN	471653	2.17492e+06	1206465			dirDIA	P17655	P17655	CAPN2	Calpain-2 catalytic subunit	P17655	CAN2_HUMAN	4425.32	6282.65	6286.28
libDIA-22xlib	P05543	P05543	SERPINA7	Thyroxine-binding globulin	P05543	THBG_HUMAN	135262	Filtered	323176			libDIA-6xlib	P04406	P04406	GAPDH	Glyceraldehyde-3-phosphate dehydrogenase	P04406	G3P_HUMAN	29682.5	39358.6	24066.6			dirDIA	P17812	P17812	CTPS1	CTP synthase 1	P17812	PYRG1_HUMAN	1237.74	1435.8	2722.07
libDIA-22xlib	P05556	P05556	ITGB1	Integrin beta-1	P05556	ITB1_HUMAN	1013.3	1141.24	1078.03			libDIA-6xlib	P04632	P04632	CAPNS1	Calpain small subunit 1	P04632	CPNS1_HUMAN	2561.12	4736.95	3487.66			dirDIA	P17844	P17844	DDX5	Probable ATP-dependent RNA helicase DDX5	P17844	DDX5_HUMAN	2433.58	3642.75	3159.75
libDIA-22xlib	P05783	P05783	KRT18	Keratin, type I cytoskeletal 18	P05783	K1C18_HUMAN	59845.7	88566	65509.4			libDIA-6xlib	P04637	P04637	TP53	Cellular tumor antigen p53	P04637	P53_HUMAN	240.757	188.176	556.196			dirDIA	P17931	P17931	LGALS3	Galectin-3	P17931	LEG3_HUMAN	1439.52	2329.99	1772.67
libDIA-22xlib	P05787	P05787	KRT8	Keratin, type II cytoskeletal 8	P05787	K2C8_HUMAN	48277.9	72074.8	34686			libDIA-6xlib	P04792	P04792	HSPB1	Heat shock protein beta-1	P04792	HSPB1_HUMAN	3467.15	4292.25	5702.36			dirDIA	P17980	P17980	PSMC3	26S protease regulatory subunit 6A	P17980	PRS6A_HUMAN	113.724	7291.89	3259.68
libDIA-22xlib	P06396	P06396	GSN	Gelsolin	P06396	GELS_HUMAN	Filtered	1857.8	1621.26			libDIA-6xlib	P04843	P04843	RPN1	Dolichyl-diphosphooligosaccharide--protein glycosyltransferase subunit 1	P04843	RPN1_HUMAN	2504.67	2082.17	2398.29			dirDIA	P17987	P17987	TCP1	T-complex protein 1 subunit alpha	P17987	TCPA_HUMAN	3173.03	5342.43	4758.8
libDIA-22xlib	P06493	P06493	CDK1	Cyclin-dependent kinase 1	P06493	CDK1_HUMAN	1788.71	2056.46	1821.84			libDIA-6xlib	P04844	P04844	RPN2	Dolichyl-diphosphooligosaccharide--protein glycosyltransferase subunit 2	P04844	RPN2_HUMAN	624.275	2181.66	208552			dirDIA	P18077	P18077	RPL35A	60S ribosomal protein L35a	P18077	RL35A_HUMAN	6206.09	7355.72	6785.15
libDIA-22xlib	P06576	P06576	ATP5B	ATP synthase subunit beta, mitochondrial	P06576	ATPB_HUMAN	9219.06	8843.75	11045.3			libDIA-6xlib	P04899	P04899	GNAI2	Guanine nucleotide-binding protein G(i) subunit alpha-2	P04899	GNAI2_HUMAN	Filtered	Filtered	Filtered			dirDIA	P18085	P18085	ARF4	ADP-ribosylation factor 4	P18085	ARF4_HUMAN	7164.24	5375.98	5401.86
libDIA-22xlib	P06702	P06702	S100A9	Protein S100-A9	P06702	S10A9_HUMAN	553.676	205.465	Filtered			libDIA-6xlib	P04908;P0C0S8;P20671;Q16777;Q6FI13;Q7L7L0;Q93077;Q96KK5;Q99878;Q9BTM1	P04908;P0C0S8;P20671;Q16777;Q6FI13;Q7L7L0;Q93077;Q96KK5;Q99878;Q9BTM1	HIST1H2AB;HIST1H2AG;HIST1H2AD;HIST2H2AC;HIST2H2AA3;HIST3H2A;HIST1H2AC;HIST1H2AH;HIST1H2AJ;H2AFJ	Histone H2A type 1-B/E;Histone H2A type 1;Histone H2A type 1-D;Histone H2A type 2-C;Histone H2A type 2-A;Histone H2A type 3;Histone H2A type 1-C;Histone H2A type 1-H;Histone H2A type 1-J;Histone H2A.J	P04908;P0C0S8;P20671;Q16777;Q6FI13;Q7L7L0;Q93077;Q96KK5;Q99878;Q9BTM1	H2A1B_HUMAN;H2A1_HUMAN;H2A1D_HUMAN;H2A2C_HUMAN;H2A2A_HUMAN;H2A3_HUMAN;H2A1C_HUMAN;H2A1H_HUMAN;H2A1J_HUMAN;H2AJ_HUMAN	5915.04	Filtered	3411.57			dirDIA	P18124	P18124	RPL7	60S ribosomal protein L7	P18124	RL7_HUMAN	14761.3	17784.8	16854.1
libDIA-22xlib	P06703	P06703	S100A6	Protein S100-A6	P06703	S10A6_HUMAN	Filtered	Filtered	Filtered			libDIA-6xlib	P05023	P05023	ATP1A1	Sodium/potassium-transporting ATPase subunit alpha-1	P05023	AT1A1_HUMAN	626.688	2439.99	1518.39			dirDIA	P18206	P18206	VCL	Vinculin	P18206	VINC_HUMAN	3561.57	6391.07	6571.91
libDIA-22xlib	P06727	P06727	APOA4	Apolipoprotein A-IV	P06727	APOA4_HUMAN	10072	16765.2	8086.86			libDIA-6xlib	P05026	P05026	ATP1B1	Sodium/potassium-transporting ATPase subunit beta-1	P05026	AT1B1_HUMAN	Filtered	Filtered	Filtered			dirDIA	P18621	P18621	RPL17	60S ribosomal protein L17	P18621	RL17_HUMAN	6308.69	7772.21	9290.69
libDIA-22xlib	P06730	P06730	EIF4E	Eukaryotic translation initiation factor 4E	P06730	IF4E_HUMAN	0.698708	Filtered	Filtered			libDIA-6xlib	P05091	P05091	ALDH2	Aldehyde dehydrogenase, mitochondrial	P05091	ALDH2_HUMAN	Filtered	Filtered	Filtered			dirDIA	P18754	P18754	RCC1	Regulator of chromosome condensation	P18754	RCC1_HUMAN	2479.32	1627.3	2123.34
libDIA-22xlib	P06733	P06733	ENO1	Alpha-enolase	P06733	ENOA_HUMAN	31616.9	25986.4	36570.5			libDIA-6xlib	P05109	P05109	S100A8	Protein S100-A8	P05109	S10A8_HUMAN	Filtered	0.581451	0.598366			dirDIA	P19338	P19338	NCL	Nucleolin	P19338	NUCL_HUMAN	16334.8	18410.7	16454.1
libDIA-22xlib	P06744	P06744	GPI	Glucose-6-phosphate isomerase	P06744	G6PI_HUMAN	1776.93	2091.64	1929.38			libDIA-6xlib	P05141	P05141	SLC25A5	ADP/ATP translocase 2	P05141	ADT2_HUMAN	9451.39	8878.85	6306.88			dirDIA	P19367	P19367	HK1	Hexokinase-1	P19367	HXK1_HUMAN	1507.96	2201.68	2492.09
libDIA-22xlib	P06748	P06748	NPM1	Nucleophosmin	P06748	NPM_HUMAN	17747.5	11670.6	16339.5			libDIA-6xlib	P05198	P05198	EIF2S1	Eukaryotic translation initiation factor 2 subunit 1	P05198	IF2A_HUMAN	5284.26	6002.52	7925.87			dirDIA	P19623	P19623	SRM	Spermidine synthase	P19623	SPEE_HUMAN	1927.64	1973.21	5158.27
libDIA-22xlib	P06753	P06753	TPM3	Tropomyosin alpha-3 chain	P06753	TPM3_HUMAN	21194.6	29892.9	35239.2			libDIA-6xlib	P05387	P05387	RPLP2	60S acidic ribosomal protein P2	P05387	RLA2_HUMAN	15052.6	23538.9	18912.3			dirDIA	P20042	P20042	EIF2S2	Eukaryotic translation initiation factor 2 subunit 2	P20042	IF2B_HUMAN	0.643318	1196.19	1444.18
libDIA-22xlib	P06899;P23527;P33778;Q16778;Q8N257	P06899;P23527;P33778;Q16778;Q8N257	HIST1H2BJ;HIST1H2BO;HIST1H2BB;HIST2H2BE;HIST3H2BB	Histone H2B type 1-J;Histone H2B type 1-O;Histone H2B type 1-B;Histone H2B type 2-E;Histone H2B type 3-B	P06899;P23527;P33778;Q16778;Q8N257	H2B1J_HUMAN;H2B1O_HUMAN;H2B1B_HUMAN;H2B2E_HUMAN;H2B3B_HUMAN	119616	82714.8	189476			libDIA-6xlib	P05388	P05388	RPLP0	60S acidic ribosomal protein P0	P05388	RLA0_HUMAN	6231.94	8647.23	10956.8			dirDIA	P20073	P20073	ANXA7	Annexin A7	P20073	ANXA7_HUMAN	114.381	1349.16	3653.19
libDIA-22xlib	P07099	P07099	EPHX1	Epoxide hydrolase 1	P07099	HYEP_HUMAN	Filtered	Filtered	Filtered			libDIA-6xlib	P05455	P05455	SSB	Lupus La protein	P05455	LA_HUMAN	Filtered	Filtered	Filtered			dirDIA	P20290	P20290	BTF3	Transcription factor BTF3	P20290	BTF3_HUMAN	215.632	1181.46	685.357
libDIA-22xlib	P07108	P07108	DBI	Acyl-CoA-binding protein	P07108	ACBP_HUMAN	Filtered	Filtered	2080.01			libDIA-6xlib	P05543	P05543	SERPINA7	Thyroxine-binding globulin	P05543	THBG_HUMAN	135262	Filtered	323176			dirDIA	P20339;P51148;P61020	P20339;P51148;P61020	RAB5A;RAB5C;RAB5B	Ras-related protein Rab-5A;Ras-related protein Rab-5C;Ras-related protein Rab-5B	P20339;P51148;P61020	RAB5A_HUMAN;RAB5C_HUMAN;RAB5B_HUMAN	4220.78	4670.22	2414.47
libDIA-22xlib	P07195	P07195	LDHB	L-lactate dehydrogenase B chain	P07195	LDHB_HUMAN	45534.7	44550	49204.8			libDIA-6xlib	P05556	P05556	ITGB1	Integrin beta-1	P05556	ITB1_HUMAN	1542.66	1465.02	1077.98			dirDIA	P20340;Q9NRW1	P20340;Q9NRW1	RAB6A;RAB6B	Ras-related protein Rab-6A;Ras-related protein Rab-6B	P20340;Q9NRW1	RAB6A_HUMAN;RAB6B_HUMAN	Filtered	749.181	Filtered
libDIA-22xlib	P07237	P07237	P4HB	Protein disulfide-isomerase	P07237	PDIA1_HUMAN	2860.29	3267.02	3893.63			libDIA-6xlib	P05783	P05783	KRT18	Keratin, type I cytoskeletal 18	P05783	K1C18_HUMAN	60688.2	89790.5	66231.1			dirDIA	P20618	P20618	PSMB1	Proteasome subunit beta type-1	P20618	PSB1_HUMAN	2993.28	4323.62	4784.81
libDIA-22xlib	P07339	P07339	CTSD	Cathepsin D	P07339	CATD_HUMAN	2674.82	5588.22	4830.86			libDIA-6xlib	P05787	P05787	KRT8	Keratin, type II cytoskeletal 8	P05787	K2C8_HUMAN	48281.1	72346.6	34779.9			dirDIA	P20674	P20674	COX5A	Cytochrome c oxidase subunit 5A, mitochondrial	P20674	COX5A_HUMAN	1106.23	1152.86	1130.74
libDIA-22xlib	P07355	P07355	ANXA2	Annexin A2	P07355	ANXA2_HUMAN	65564.1	97686.1	92186.1			libDIA-6xlib	P06132	P06132	UROD	Uroporphyrinogen decarboxylase	P06132	DCUP_HUMAN	Filtered	Filtered	Filtered			dirDIA	P20700	P20700	LMNB1	Lamin-B1	P20700	LMNB1_HUMAN	3081.69	1858.99	1187.54
libDIA-22xlib	P07384	P07384	CAPN1	Calpain-1 catalytic subunit	P07384	CAN1_HUMAN	2540.57	4135.18	4543.34			libDIA-6xlib	P06239;P06241;P07947;P12931	P06239;P06241;P07947;P12931	LCK;FYN;YES1;SRC	Tyrosine-protein kinase Lck;Tyrosine-protein kinase Fyn;Tyrosine-protein kinase Yes;Proto-oncogene tyrosine-protein kinase Src	P06239;P06241;P07947;P12931	LCK_HUMAN;FYN_HUMAN;YES_HUMAN;SRC_HUMAN	Filtered	Filtered	Filtered			dirDIA	P20962	P20962	PTMS	Parathymosin	P20962	PTMS_HUMAN	2531.16	2835.58	2178.54
libDIA-22xlib	P07437	P07437	TUBB	Tubulin beta chain	P07437	TBB5_HUMAN	74941.8	86837.5	67361.5			libDIA-6xlib	P06396	P06396	GSN	Gelsolin	P06396	GELS_HUMAN	1308.75	1857.81	811.031			dirDIA	P21266	P21266	GSTM3	Glutathione S-transferase Mu 3	P21266	GSTM3_HUMAN	Filtered	0.653893	1.14375
libDIA-22xlib	P07477;P07478;Q8NHM4	P07477;P07478;Q8NHM4	PRSS1;PRSS2;PRSS3P2	Trypsin-1;Trypsin-2;Putative trypsin-6	P07477;P07478;Q8NHM4	TRY1_HUMAN;TRY2_HUMAN;TRY6_HUMAN	14857	15407.6	18910.6			libDIA-6xlib	P06493	P06493	CDK1	Cyclin-dependent kinase 1	P06493	CDK1_HUMAN	2004.84	2243.26	1824.18			dirDIA	P21291	P21291	CSRP1	Cysteine and glycine-rich protein 1	P21291	CSRP1_HUMAN	Filtered	229.494	Filtered
libDIA-22xlib	P07602	P07602	PSAP	Prosaposin	P07602	SAP_HUMAN	Filtered	1442.06	Filtered			libDIA-6xlib	P06576	P06576	ATP5B	ATP synthase subunit beta, mitochondrial	P06576	ATPB_HUMAN	11525.7	10935.6	13852.2			dirDIA	P21333	P21333	FLNA	Filamin-A	P21333	FLNA_HUMAN	22446.2	26274	29619
libDIA-22xlib	P07686	P07686	HEXB	Beta-hexosaminidase subunit beta	P07686	HEXB_HUMAN	Filtered	Filtered	Filtered			libDIA-6xlib	P06702	P06702	S100A9	Protein S100-A9	P06702	S10A9_HUMAN	553.861	205.451	Filtered			dirDIA	P21796	P21796	VDAC1	Voltage-dependent anion-selective channel protein 1	P21796	VDAC1_HUMAN	2443.73	4585.46	1461.5
libDIA-22xlib	P07737	P07737	PFN1	Profilin-1	P07737	PROF1_HUMAN	86879.9	93842.2	79579.2			libDIA-6xlib	P06727	P06727	APOA4	Apolipoprotein A-IV	P06727	APOA4_HUMAN	5973.33	16765.2	4676.26			dirDIA	P21926	P21926	CD9	CD9 antigen	P21926	CD9_HUMAN	Filtered	Filtered	Filtered
libDIA-22xlib	P07741	P07741	APRT	Adenine phosphoribosyltransferase	P07741	APT_HUMAN	Filtered	2878.96	2583.21			libDIA-6xlib	P06730	P06730	EIF4E	Eukaryotic translation initiation factor 4E	P06730	IF4E_HUMAN	Filtered	Filtered	Filtered			dirDIA	P21980	P21980	TGM2	Protein-glutamine gamma-glutamyltransferase 2	P21980	TGM2_HUMAN	24977.8	30057.7	37456.1
libDIA-22xlib	P07814	P07814	EPRS	Bifunctional glutamate/proline--tRNA ligase	P07814	SYEP_HUMAN	887.071	567.152	453.509			libDIA-6xlib	P06733	P06733	ENO1	Alpha-enolase	P06733	ENOA_HUMAN	31662.8	25853.4	36823.1			dirDIA	P22102	P22102	GART	Trifunctional purine biosynthetic protein adenosine-3	P22102	PUR2_HUMAN	4643.42	4062.32	5191.46
libDIA-22xlib	P07858	P07858	CTSB	Cathepsin B	P07858	CATB_HUMAN	1523.57	3088.63	3257.92			libDIA-6xlib	P06737	P06737	PYGL	Glycogen phosphorylase, liver form	P06737	PYGL_HUMAN	Filtered	Filtered	Filtered			dirDIA	P22234	P22234	PAICS	Multifunctional protein ADE2	P22234	PUR6_HUMAN	2036.32	3114.98	5308.64
libDIA-22xlib	P07900	P07900	HSP90AA1	Heat shock protein HSP 90-alpha	P07900	HS90A_HUMAN	70690.6	85658.5	107839			libDIA-6xlib	P06744	P06744	GPI	Glucose-6-phosphate isomerase	P06744	G6PI_HUMAN	1450.76	1879	1362.19			dirDIA	P22314	P22314	UBA1	Ubiquitin-like modifier-activating enzyme 1	P22314	UBA1_HUMAN	1195.6	1563.2	2444.92
libDIA-22xlib	P07910	P07910	HNRNPC	Heterogeneous nuclear ribonucleoproteins C1/C2	P07910	HNRPC_HUMAN	17793.8	15962.5	19351.1			libDIA-6xlib	P06748	P06748	NPM1	Nucleophosmin	P06748	NPM_HUMAN	14857.4	12405.9	20962.8			dirDIA	P22626	P22626	HNRNPA2B1	Heterogeneous nuclear ribonucleoproteins A2/B1	P22626	ROA2_HUMAN	58806	49465	34011.7
libDIA-22xlib	P07954	P07954	FH	Fumarate hydratase, mitochondrial	P07954	FUMH_HUMAN	Filtered	Filtered	1315.46			libDIA-6xlib	P06753	P06753	TPM3	Tropomyosin alpha-3 chain	P06753	TPM3_HUMAN	21194.6	24132.4	35239.1			dirDIA	P22676	P22676	CALB2	Calretinin	P22676	CALB2_HUMAN	1702.96	2135.43	1644.81
libDIA-22xlib	P08195	P08195	SLC3A2	4F2 cell-surface antigen heavy chain	P08195	4F2_HUMAN	5926.14	4893.75	4914.09			libDIA-6xlib	P06865	P06865	HEXA	Beta-hexosaminidase subunit alpha	P06865	HEXA_HUMAN	Filtered	Filtered	81092.8			dirDIA	P22695	P22695	UQCRC2	Cytochrome b-c1 complex subunit 2, mitochondrial	P22695	QCR2_HUMAN	653.196	247.693	Filtered
libDIA-22xlib	P08238	P08238	HSP90AB1	Heat shock protein HSP 90-beta	P08238	HS90B_HUMAN	166499	189338	225259			libDIA-6xlib	P06899;P23527;P33778;Q16778;Q8N257	P06899;P23527;P33778;Q16778;Q8N257	HIST1H2BJ;HIST1H2BO;HIST1H2BB;HIST2H2BE;HIST3H2BB	Histone H2B type 1-J;Histone H2B type 1-O;Histone H2B type 1-B;Histone H2B type 2-E;Histone H2B type 3-B	P06899;P23527;P33778;Q16778;Q8N257	H2B1J_HUMAN;H2B1O_HUMAN;H2B1B_HUMAN;H2B2E_HUMAN;H2B3B_HUMAN	120244	83306.5	190332			dirDIA	P23229	P23229	ITGA6	Integrin alpha-6	P23229	ITA6_HUMAN	205.975	398.462	851.122
libDIA-22xlib	P08240	P08240	SRPR	Signal recognition particle receptor subunit alpha	P08240	SRPR_HUMAN	Filtered	Filtered	Filtered			libDIA-6xlib	P07099	P07099	EPHX1	Epoxide hydrolase 1	P07099	HYEP_HUMAN	Filtered	734.39	816.329			dirDIA	P23246	P23246	SFPQ	Splicing factor, proline- and glutamine-rich	P23246	SFPQ_HUMAN	982.228	1607.7	1555.75
libDIA-22xlib	P08559	P08559	PDHA1	Pyruvate dehydrogenase E1 component subunit alpha, somatic form, mitochondrial	P08559	ODPA_HUMAN	Filtered	Filtered	Filtered			libDIA-6xlib	P07108	P07108	DBI	Acyl-CoA-binding protein	P07108	ACBP_HUMAN	Filtered	Filtered	Filtered			dirDIA	P23284	P23284	PPIB	Peptidyl-prolyl cis-trans isomerase B	P23284	PPIB_HUMAN	4219.46	2649.01	3747.19
libDIA-22xlib	P08574	P08574	CYC1	Cytochrome c1, heme protein, mitochondrial	P08574	CY1_HUMAN	Filtered	Filtered	Filtered			libDIA-6xlib	P07195	P07195	LDHB	L-lactate dehydrogenase B chain	P07195	LDHB_HUMAN	45547.8	44615.1	49135.4			dirDIA	P23396	P23396	RPS3	40S ribosomal protein S3	P23396	RS3_HUMAN	15524.3	20668.9	23875.2
libDIA-22xlib	P08575	P08575	PTPRC	Receptor-type tyrosine-protein phosphatase C	P08575	PTPRC_HUMAN	217226	394166	545286			libDIA-6xlib	P07237	P07237	P4HB	Protein disulfide-isomerase	P07237	PDIA1_HUMAN	3043.88	4123.48	3955.76			dirDIA	P23526	P23526	AHCY	Adenosylhomocysteinase	P23526	SAHH_HUMAN	6141.86	4293.39	5562.7
libDIA-22xlib	P08579	P08579	SNRPB2	U2 small nuclear ribonucleoprotein B''	P08579	RU2B_HUMAN	Filtered	Filtered	874.165			libDIA-6xlib	P07339	P07339	CTSD	Cathepsin D	P07339	CATD_HUMAN	2539.99	5848.89	4911.48			dirDIA	P23528	P23528	CFL1	Cofilin-1	P23528	COF1_HUMAN	20727.6	33519.1	31627.6
libDIA-22xlib	P08621	P08621	SNRNP70	U1 small nuclear ribonucleoprotein 70 kDa	P08621	RU17_HUMAN	Filtered	1643.48	1931.68			libDIA-6xlib	P07355	P07355	ANXA2	Annexin A2	P07355	ANXA2_HUMAN	65814.5	98120.6	92669			dirDIA	P23919	P23919	DTYMK	Thymidylate kinase	P23919	KTHY_HUMAN	4300.83	6572.58	10575.5
libDIA-22xlib	P08670	P08670	VIM	Vimentin	P08670	VIME_HUMAN	1712.74	1373.27	907.385			libDIA-6xlib	P07384	P07384	CAPN1	Calpain-1 catalytic subunit	P07384	CAN1_HUMAN	2132.71	2573.53	3190.42			dirDIA	P24666	P24666	ACP1	Low molecular weight phosphotyrosine protein phosphatase	P24666	PPAC_HUMAN	4692.05	2561.53	2022.32
libDIA-22xlib	P08708	P08708	RPS17	40S ribosomal protein S17	P08708	RS17_HUMAN	Filtered	Filtered	Filtered			libDIA-6xlib	P07437	P07437	TUBB	Tubulin beta chain	P07437	TBB5_HUMAN	61293	72393.1	62024.9			dirDIA	P25398	P25398	RPS12	40S ribosomal protein S12	P25398	RS12_HUMAN	4721.67	5941.43	7373.99
libDIA-22xlib	P08727	P08727	KRT19	Keratin, type I cytoskeletal 19	P08727	K1C19_HUMAN	138825	237880	153319			libDIA-6xlib	P07477;P07478;Q8NHM4	P07477;P07478;Q8NHM4	PRSS1;PRSS2;PRSS3P2	Trypsin-1;Trypsin-2;Putative trypsin-6	P07477;P07478;Q8NHM4	TRY1_HUMAN;TRY2_HUMAN;TRY6_HUMAN	195946	164038	274461			dirDIA	P25705	P25705	ATP5A1	ATP synthase subunit alpha, mitochondrial	P25705	ATPA_HUMAN	7490.91	9137.85	11579.2
libDIA-22xlib	P08729	P08729	KRT7	Keratin, type II cytoskeletal 7	P08729	K2C7_HUMAN	64493.6	71034.4	59400.9			libDIA-6xlib	P07602	P07602	PSAP	Prosaposin	P07602	SAP_HUMAN	0.743523	0.78376	Filtered			dirDIA	P25786	P25786	PSMA1	Proteasome subunit alpha type-1	P25786	PSA1_HUMAN	1649.08	2705.29	3291.93
libDIA-22xlib	P08758	P08758	ANXA5	Annexin A5	P08758	ANXA5_HUMAN	28212.6	24944.7	32616.8			libDIA-6xlib	P07686	P07686	HEXB	Beta-hexosaminidase subunit beta	P07686	HEXB_HUMAN	Filtered	Filtered	Filtered			dirDIA	P25787	P25787	PSMA2	Proteasome subunit alpha type-2	P25787	PSA2_HUMAN	Filtered	Filtered	Filtered
libDIA-22xlib	P08779	P08779	KRT16	Keratin, type I cytoskeletal 16	P08779	K1C16_HUMAN	Filtered	18.9263	Filtered			libDIA-6xlib	P07737	P07737	PFN1	Profilin-1	P07737	PROF1_HUMAN	86879.9	93842.2	79579.2			dirDIA	P25788	P25788	PSMA3	Proteasome subunit alpha type-3	P25788	PSA3_HUMAN	692.285	1385.34	2251.21
libDIA-22xlib	P08865	P08865	RPSA	40S ribosomal protein SA	P08865	RSSA_HUMAN	21809.1	31252.6	34748.9			libDIA-6xlib	P07741	P07741	APRT	Adenine phosphoribosyltransferase	P07741	APT_HUMAN	Filtered	2878.88	2583.18			dirDIA	P25789	P25789	PSMA4	Proteasome subunit alpha type-4	P25789	PSA4_HUMAN	4330.77	5844.95	6056.44
libDIA-22xlib	P08962	P08962	CD63	CD63 antigen	P08962	CD63_HUMAN	1267.86	Filtered	Filtered			libDIA-6xlib	P07814	P07814	EPRS	Bifunctional glutamate/proline--tRNA ligase	P07814	SYEP_HUMAN	603.189	567.143	802.526			dirDIA	P25815	P25815	S100P	Protein S100-P	P25815	S100P_HUMAN	3456.67	3919.53	Filtered
libDIA-22xlib	P09012	P09012	SNRPA	U1 small nuclear ribonucleoprotein A	P09012	SNRPA_HUMAN	Filtered	Filtered	Filtered			libDIA-6xlib	P07858	P07858	CTSB	Cathepsin B	P07858	CATB_HUMAN	1523.61	3045.17	3257.95			dirDIA	P26038	P26038	MSN	Moesin	P26038	MOES_HUMAN	7506.13	11714.2	8969.87
libDIA-22xlib	P09211	P09211	GSTP1	Glutathione S-transferase P	P09211	GSTP1_HUMAN	10277.2	11149.5	18490.3			libDIA-6xlib	P07900	P07900	HSP90AA1	Heat shock protein HSP 90-alpha	P07900	HS90A_HUMAN	70635.1	85658.5	107375			dirDIA	P26373	P26373	RPL13	60S ribosomal protein L13	P26373	RL13_HUMAN	7855.64	10597.7	12855
libDIA-22xlib	P09382	P09382	LGALS1	Galectin-1	P09382	LEG1_HUMAN	20017.5	20778.9	13462.7			libDIA-6xlib	P07910	P07910	HNRNPC	Heterogeneous nuclear ribonucleoproteins C1/C2	P07910	HNRPC_HUMAN	9309.06	7986.04	8402.88			dirDIA	P26447	P26447	S100A4	Protein S100-A4	P26447	S10A4_HUMAN	3610.91	1151.9	4160.49
libDIA-22xlib	P09429	P09429	HMGB1	High mobility group protein B1	P09429	HMGB1_HUMAN	5776.76	10153.2	12104.2			libDIA-6xlib	P07954	P07954	FH	Fumarate hydratase, mitochondrial	P07954	FUMH_HUMAN	1182.73	Filtered	1077.75			dirDIA	P26583	P26583	HMGB2	High mobility group protein B2	P26583	HMGB2_HUMAN	4631.97	5364.31	5734.4
libDIA-22xlib	P09493	P09493	TPM1	Tropomyosin alpha-1 chain	P09493	TPM1_HUMAN	Filtered	188.754	Filtered			libDIA-6xlib	P08133	P08133	ANXA6	Annexin A6	P08133	ANXA6_HUMAN	Filtered	Filtered	Filtered			dirDIA	P26599	P26599	PTBP1	Polypyrimidine tract-binding protein 1	P26599	PTBP1_HUMAN	4138.95	4562.27	6962.35
libDIA-22xlib	P09525	P09525	ANXA4	Annexin A4	P09525	ANXA4_HUMAN	1518.86	1621.96	1021.25			libDIA-6xlib	P08195	P08195	SLC3A2	4F2 cell-surface antigen heavy chain	P08195	4F2_HUMAN	5394.38	4218.78	4889.15			dirDIA	P26639	P26639	TARS	Threonine--tRNA ligase, cytoplasmic	P26639	SYTC_HUMAN	1442.89	2392.35	2275.35
libDIA-22xlib	P09543	P09543	CNP	2',3'-cyclic-nucleotide 3'-phosphodiesterase	P09543	CN37_HUMAN	Filtered	Filtered	Filtered			libDIA-6xlib	P08237	P08237	PFKM	ATP-dependent 6-phosphofructokinase, muscle type	P08237	PFKAM_HUMAN	Filtered	Filtered	Filtered			dirDIA	P26641	P26641	EEF1G	Elongation factor 1-gamma	P26641	EF1G_HUMAN	25936	37774.5	35975.8
libDIA-22xlib	P09622	P09622	DLD	Dihydrolipoyl dehydrogenase, mitochondrial	P09622	DLDH_HUMAN	1336.91	Filtered	Filtered			libDIA-6xlib	P08238	P08238	HSP90AB1	Heat shock protein HSP 90-beta	P08238	HS90B_HUMAN	161788	186572	194555			dirDIA	P26885	P26885	FKBP2	Peptidyl-prolyl cis-trans isomerase FKBP2	P26885	FKBP2_HUMAN	Filtered	2210.37	4159.54
libDIA-22xlib	P09651;Q32P51	P09651;Q32P51	HNRNPA1;HNRNPA1L2	Heterogeneous nuclear ribonucleoprotein A1;Heterogeneous nuclear ribonucleoprotein A1-like 2	P09651;Q32P51	ROA1_HUMAN;RA1L2_HUMAN	16577.9	19813.6	17687.8			libDIA-6xlib	P08559	P08559	PDHA1	Pyruvate dehydrogenase E1 component subunit alpha, somatic form, mitochondrial	P08559	ODPA_HUMAN	Filtered	1519.75	1919.52			dirDIA	P27348	P27348	YWHAQ	14-3-3 protein theta	P27348	1433T_HUMAN	5982.41	6900.41	9346.15
libDIA-22xlib	P09661	P09661	SNRPA1	U2 small nuclear ribonucleoprotein A'	P09661	RU2A_HUMAN	Filtered	179.285	Filtered			libDIA-6xlib	P08574	P08574	CYC1	Cytochrome c1, heme protein, mitochondrial	P08574	CY1_HUMAN	Filtered	Filtered	Filtered			dirDIA	P27635	P27635	RPL10	60S ribosomal protein L10	P27635	RL10_HUMAN	844.271	2279.55	1650.03
libDIA-22xlib	P09669	P09669	COX6C	Cytochrome c oxidase subunit 6C	P09669	COX6C_HUMAN	2459.53	1796.19	1634.28			libDIA-6xlib	P08575	P08575	PTPRC	Receptor-type tyrosine-protein phosphatase C	P08575	PTPRC_HUMAN	300327	396660	533564			dirDIA	P27797	P27797	CALR	Calreticulin	P27797	CALR_HUMAN	178.311	1148.97	910.512
libDIA-22xlib	P09758	P09758	TACSTD2	Tumor-associated calcium signal transducer 2	P09758	TACD2_HUMAN	Filtered	Filtered	Filtered			libDIA-6xlib	P08579	P08579	SNRPB2	U2 small nuclear ribonucleoprotein B''	P08579	RU2B_HUMAN	Filtered	0.614983	661.622			dirDIA	P27816	P27816	MAP4	Microtubule-associated protein 4	P27816	MAP4_HUMAN	905.117	1139.16	1191.93
libDIA-22xlib	P09874	P09874	PARP1	Poly [ADP-ribose] polymerase 1	P09874	PARP1_HUMAN	23212.2	28275.8	25826			libDIA-6xlib	P08621	P08621	SNRNP70	U1 small nuclear ribonucleoprotein 70 kDa	P08621	RU17_HUMAN	Filtered	2733.63	1931.74			dirDIA	P27824	P27824	CANX	Calnexin	P27824	CALX_HUMAN	2627.34	4868.21	3950.27
libDIA-22xlib	P09936	P09936	UCHL1	Ubiquitin carboxyl-terminal hydrolase isozyme L1	P09936	UCHL1_HUMAN	17005.7	15645.7	15839.4			libDIA-6xlib	P08670	P08670	VIM	Vimentin	P08670	VIME_HUMAN	2276.67	1720.98	1129.53			dirDIA	P28066	P28066	PSMA5	Proteasome subunit alpha type-5	P28066	PSA5_HUMAN	2028.02	3841.72	2946.31
libDIA-22xlib	P09960	P09960	LTA4H	Leukotriene A-4 hydrolase	P09960	LKHA4_HUMAN	Filtered	Filtered	1644.76			libDIA-6xlib	P08727	P08727	KRT19	Keratin, type I cytoskeletal 19	P08727	K1C19_HUMAN	137958	234509	151452			dirDIA	P28070	P28070	PSMB4	Proteasome subunit beta type-4	P28070	PSB4_HUMAN	0.628727	0.481487	Filtered
libDIA-22xlib	P09972	P09972	ALDOC	Fructose-bisphosphate aldolase C	P09972	ALDOC_HUMAN	Filtered	Filtered	3101.73			libDIA-6xlib	P08729	P08729	KRT7	Keratin, type II cytoskeletal 7	P08729	K2C7_HUMAN	64537.8	71034.4	59401			dirDIA	P28072	P28072	PSMB6	Proteasome subunit beta type-6	P28072	PSB6_HUMAN	3609.13	5844.11	4636.88
libDIA-22xlib	P0C0S5;Q71UI9	P0C0S5;Q71UI9	H2AFZ;H2AFV	Histone H2A.Z;Histone H2A.V	P0C0S5;Q71UI9	H2AZ_HUMAN;H2AV_HUMAN	3557.16	3561.89	5120.55			libDIA-6xlib	P08758	P08758	ANXA5	Annexin A5	P08758	ANXA5_HUMAN	28170.6	25021.7	32510.1			dirDIA	P28074	P28074	PSMB5	Proteasome subunit beta type-5	P28074	PSB5_HUMAN	311.886	1289.41	0.757256
libDIA-22xlib	P0CG12	P0CG12	CHTF8	Chromosome transmission fidelity protein 8 homolog isoform 2	P0CG12	CTF8A_HUMAN	Filtered	Filtered	Filtered			libDIA-6xlib	P08779	P08779	KRT16	Keratin, type I cytoskeletal 16	P08779	K1C16_HUMAN	Filtered	750.551	0.432095			dirDIA	P29373	P29373	CRABP2	Cellular retinoic acid-binding protein 2	P29373	RABP2_HUMAN	1121.57	965.923	Filtered
libDIA-22xlib	P0CG47;P0CG48;P62979;P62987	P0CG47;P0CG48;P62979;P62987	UBB;UBC;RPS27A;UBA52	Polyubiquitin-B;Polyubiquitin-C;Ubiquitin-40S ribosomal protein S27a;Ubiquitin-60S ribosomal protein L40	P0CG47;P0CG48;P62979;P62987	UBB_HUMAN;UBC_HUMAN;RS27A_HUMAN;RL40_HUMAN	34494	38734.8	35764.9			libDIA-6xlib	P08865	P08865	RPSA	40S ribosomal protein SA	P08865	RSSA_HUMAN	21809.1	31252.6	34748.9			dirDIA	P29401	P29401	TKT	Transketolase	P29401	TKT_HUMAN	6954.8	6167.08	11072.9
libDIA-22xlib	P0DMM9;P0DMN0;P50225;P50226	P0DMM9;P0DMN0;P50225;P50226	SULT1A3;SULT1A4;SULT1A1;SULT1A2	Sulfotransferase 1A3;Sulfotransferase 1A4;Sulfotransferase 1A1;Sulfotransferase 1A2	P0DMM9;P0DMN0;P50225;P50226	ST1A3_HUMAN;ST1A4_HUMAN;ST1A1_HUMAN;ST1A2_HUMAN	Filtered	Filtered	Filtered			libDIA-6xlib	P08962	P08962	CD63	CD63 antigen	P08962	CD63_HUMAN	1267.86	Filtered	326.414			dirDIA	P29692	P29692	EEF1D	Elongation factor 1-delta	P29692	EF1D_HUMAN	13508.4	19380	18764.1
libDIA-22xlib	P0DMV8;P0DMV9	P0DMV8;P0DMV9	HSPA1A;HSPA1B	Heat shock 70 kDa protein 1A;Heat shock 70 kDa protein 1B	P0DMV8;P0DMV9	HS71A_HUMAN;HS71B_HUMAN	50441.9	53875.2	62546.3			libDIA-6xlib	P09012	P09012	SNRPA	U1 small nuclear ribonucleoprotein A	P09012	SNRPA_HUMAN	Filtered	Filtered	Filtered			dirDIA	P30040	P30040	ERP29	Endoplasmic reticulum resident protein 29	P30040	ERP29_HUMAN	240.962	932.336	1413.15
libDIA-22xlib	P10114;P61225;Q9Y3L5	P10114;P61225;Q9Y3L5	RAP2A;RAP2B;RAP2C	Ras-related protein Rap-2a;Ras-related protein Rap-2b;Ras-related protein Rap-2c	P10114;P61225;Q9Y3L5	RAP2A_HUMAN;RAP2B_HUMAN;RAP2C_HUMAN	Filtered	Filtered	Filtered			libDIA-6xlib	P09104	P09104	ENO2	Gamma-enolase	P09104	ENOG_HUMAN	Filtered	Filtered	Filtered			dirDIA	P30041	P30041	PRDX6	Peroxiredoxin-6	P30041	PRDX6_HUMAN	13020.3	17667.1	16912
libDIA-22xlib	P10412;P16402;P16403	P10412;P16402;P16403	HIST1H1E;HIST1H1D;HIST1H1C	Histone H1.4;Histone H1.3;Histone H1.2	P10412;P16402;P16403	H14_HUMAN;H13_HUMAN;H12_HUMAN	55293.2	45264.8	43893.9			libDIA-6xlib	P09110	P09110	ACAA1	3-ketoacyl-CoA thiolase, peroxisomal	P09110	THIK_HUMAN	Filtered	Filtered	Filtered			dirDIA	P30043	P30043	BLVRB	Flavin reductase (NADPH)	P30043	BLVRB_HUMAN	1370.17	841.916	3191.63
libDIA-22xlib	P10515	P10515	DLAT	Dihydrolipoyllysine-residue acetyltransferase component of pyruvate dehydrogenase complex, mitochondrial	P10515	ODP2_HUMAN	Filtered	Filtered	Filtered			libDIA-6xlib	P09211	P09211	GSTP1	Glutathione S-transferase P	P09211	GSTP1_HUMAN	10471.8	10687.3	17876			dirDIA	P30044	P30044	PRDX5	Peroxiredoxin-5, mitochondrial	P30044	PRDX5_HUMAN	9566.81	10917.9	11897
libDIA-22xlib	P10599	P10599	TXN	Thioredoxin	P10599	THIO_HUMAN	59284.4	85130.2	57607.8			libDIA-6xlib	P09382	P09382	LGALS1	Galectin-1	P09382	LEG1_HUMAN	20017.6	20777.2	13462.8			dirDIA	P30048	P30048	PRDX3	Thioredoxin-dependent peroxide reductase, mitochondrial	P30048	PRDX3_HUMAN	795.734	2394.19	2277.64
libDIA-22xlib	P10606	P10606	COX5B	Cytochrome c oxidase subunit 5B, mitochondrial	P10606	COX5B_HUMAN	368.632	Filtered	1456.14			libDIA-6xlib	P09417	P09417	QDPR	Dihydropteridine reductase	P09417	DHPR_HUMAN	Filtered	Filtered	Filtered			dirDIA	P30049	P30049	ATP5D	ATP synthase subunit delta, mitochondrial	P30049	ATPD_HUMAN	1823.1	1539.02	1062.51
libDIA-22xlib	P10619	P10619	CTSA	Lysosomal protective protein	P10619	PPGB_HUMAN	Filtered	Filtered	Filtered			libDIA-6xlib	P09429	P09429	HMGB1	High mobility group protein B1	P09429	HMGB1_HUMAN	5987.69	7715.9	7441.99			dirDIA	P30050	P30050	RPL12	60S ribosomal protein L12	P30050	RL12_HUMAN	10964.7	22140.1	8664.02
libDIA-22xlib	P10620	P10620	MGST1	Microsomal glutathione S-transferase 1	P10620	MGST1_HUMAN	4033.32	2469.83	2362.4			libDIA-6xlib	P09493	P09493	TPM1	Tropomyosin alpha-1 chain	P09493	TPM1_HUMAN	46726.4	29439.8	39125.7			dirDIA	P30085	P30085	CMPK1	UMP-CMP kinase	P30085	KCY_HUMAN	Filtered	5731.79	5188.56
libDIA-22xlib	P10644	P10644	PRKAR1A	cAMP-dependent protein kinase type I-alpha regulatory subunit	P10644	KAP0_HUMAN	Filtered	Filtered	1224.35			libDIA-6xlib	P09525	P09525	ANXA4	Annexin A4	P09525	ANXA4_HUMAN	1128.51	1117.3	1367.02			dirDIA	P30086	P30086	PEBP1	Phosphatidylethanolamine-binding protein 1	P30086	PEBP1_HUMAN	4376.56	10092.1	6933.85
libDIA-22xlib	P10768	P10768	ESD	S-formylglutathione hydrolase	P10768	ESTD_HUMAN	Filtered	Filtered	Filtered			libDIA-6xlib	P09543	P09543	CNP	2',3'-cyclic-nucleotide 3'-phosphodiesterase	P09543	CN37_HUMAN	Filtered	Filtered	Filtered			dirDIA	P30101	P30101	PDIA3	Protein disulfide-isomerase A3	P30101	PDIA3_HUMAN	6721.9	9330.82	8813.2
libDIA-22xlib	P10809	P10809	HSPD1	60 kDa heat shock protein, mitochondrial	P10809	CH60_HUMAN	10668.9	12136.5	11721.9			libDIA-6xlib	P09622	P09622	DLD	Dihydrolipoyl dehydrogenase, mitochondrial	P09622	DLDH_HUMAN	1135.83	Filtered	Filtered			dirDIA	P30153	P30153	PPP2R1A	Serine/threonine-protein phosphatase 2A 65 kDa regulatory subunit A alpha isoform	P30153	2AAA_HUMAN	2099.45	1832.68	4249.6
libDIA-22xlib	P11021	P11021	HSPA5	78 kDa glucose-regulated protein	P11021	GRP78_HUMAN	2114.58	5750.56	3794.36			libDIA-6xlib	P09651	P09651	HNRNPA1	Heterogeneous nuclear ribonucleoprotein A1	P09651	ROA1_HUMAN	17314.4	20845.2	18711.8			dirDIA	P30520	P30520	ADSS	Adenylosuccinate synthetase isozyme 2	P30520	PURA2_HUMAN	Filtered	2143.52	1263.47
libDIA-22xlib	P11142	P11142	HSPA8	Heat shock cognate 71 kDa protein	P11142	HSP7C_HUMAN	57714.7	80839.9	74911.6			libDIA-6xlib	P09661	P09661	SNRPA1	U2 small nuclear ribonucleoprotein A'	P09661	RU2A_HUMAN	Filtered	Filtered	Filtered			dirDIA	P30533	P30533	LRPAP1	Alpha-2-macroglobulin receptor-associated protein	P30533	AMRP_HUMAN	Filtered	Filtered	2832.05
libDIA-22xlib	P11166	P11166	SLC2A1	Solute carrier family 2, facilitated glucose transporter member 1	P11166	GTR1_HUMAN	Filtered	2935.34	3699.31			libDIA-6xlib	P09669	P09669	COX6C	Cytochrome c oxidase subunit 6C	P09669	COX6C_HUMAN	1230.22	989.051	1634.24			dirDIA	P30740	P30740	SERPINB1	Leukocyte elastase inhibitor	P30740	ILEU_HUMAN	0.525925	998.445	379.871
libDIA-22xlib	P11172	P11172	UMPS	Uridine 5'-monophosphate synthase	P11172	UMPS_HUMAN	Filtered	Filtered	Filtered			libDIA-6xlib	P09758	P09758	TACSTD2	Tumor-associated calcium signal transducer 2	P09758	TACD2_HUMAN	Filtered	Filtered	0.437428			dirDIA	P30838	P30838	ALDH3A1	Aldehyde dehydrogenase, dimeric NADP-preferring	P30838	AL3A1_HUMAN	Filtered	Filtered	874.321
libDIA-22xlib	P11177	P11177	PDHB	Pyruvate dehydrogenase E1 component subunit beta, mitochondrial	P11177	ODPB_HUMAN	Filtered	Filtered	1040.89			libDIA-6xlib	P09874	P09874	PARP1	Poly [ADP-ribose] polymerase 1	P09874	PARP1_HUMAN	2423.33	3075.07	3496.3			dirDIA	P31151	P31151	S100A7	Protein S100-A7	P31151	S10A7_HUMAN	Filtered	2804.95	4258.74
libDIA-22xlib	P11216	P11216	PYGB	Glycogen phosphorylase, brain form	P11216	PYGB_HUMAN	1883.22	3265.18	4476.65			libDIA-6xlib	P09936	P09936	UCHL1	Ubiquitin carboxyl-terminal hydrolase isozyme L1	P09936	UCHL1_HUMAN	17005.9	10430.6	11748.6			dirDIA	P31153	P31153	MAT2A	S-adenosylmethionine synthase isoform type-2	P31153	METK2_HUMAN	1231.39	3338.45	4709.77
libDIA-22xlib	P11234	P11234	RALB	Ras-related protein Ral-B	P11234	RALB_HUMAN	Filtered	Filtered	Filtered			libDIA-6xlib	P09960	P09960	LTA4H	Leukotriene A-4 hydrolase	P09960	LKHA4_HUMAN	Filtered	Filtered	1644.74			dirDIA	P31930	P31930	UQCRC1	Cytochrome b-c1 complex subunit 1, mitochondrial	P31930	QCR1_HUMAN	1382.82	1416.05	1394.62
libDIA-22xlib	P11279	P11279	LAMP1	Lysosome-associated membrane glycoprotein 1	P11279	LAMP1_HUMAN	3898.74	4666.66	1900.54			libDIA-6xlib	P09972	P09972	ALDOC	Fructose-bisphosphate aldolase C	P09972	ALDOC_HUMAN	Filtered	Filtered	4078.08			dirDIA	P31939	P31939	ATIC	Bifunctional purine biosynthesis protein PURH	P31939	PUR9_HUMAN	5271.59	5245.36	3906.8
libDIA-22xlib	P11387	P11387	TOP1	DNA topoisomerase 1	P11387	TOP1_HUMAN	Filtered	Filtered	Filtered			libDIA-6xlib	P0C0S5;Q71UI9	P0C0S5;Q71UI9	H2AFZ;H2AFV	Histone H2A.Z;Histone H2A.V	P0C0S5;Q71UI9	H2AZ_HUMAN;H2AV_HUMAN	3557.15	3010.64	5120.56			dirDIA	P31942	P31942	HNRNPH3	Heterogeneous nuclear ribonucleoprotein H3	P31942	HNRH3_HUMAN	1725.6	2400.88	2309.73
libDIA-22xlib	P11388	P11388	TOP2A	DNA topoisomerase 2-alpha	P11388	TOP2A_HUMAN	Filtered	Filtered	Filtered			libDIA-6xlib	P0CG47;P0CG48;P62979;P62987	P0CG47;P0CG48;P62979;P62987	UBB;UBC;RPS27A;UBA52	Polyubiquitin-B;Polyubiquitin-C;Ubiquitin-40S ribosomal protein S27a;Ubiquitin-60S ribosomal protein L40	P0CG47;P0CG48;P62979;P62987	UBB_HUMAN;UBC_HUMAN;RS27A_HUMAN;RL40_HUMAN	34428.9	38441.9	35688.8			dirDIA	P31943	P31943	HNRNPH1	Heterogeneous nuclear ribonucleoprotein H	P31943	HNRH1_HUMAN	5408.01	4868.09	6373.21
libDIA-22xlib	P11413	P11413	G6PD	Glucose-6-phosphate 1-dehydrogenase	P11413	G6PD_HUMAN	26588	32191.3	36153.4			libDIA-6xlib	P0DMM9;P0DMN0;P50225;P50226	P0DMM9;P0DMN0;P50225;P50226	SULT1A3;SULT1A4;SULT1A1;SULT1A2	Sulfotransferase 1A3;Sulfotransferase 1A4;Sulfotransferase 1A1;Sulfotransferase 1A2	P0DMM9;P0DMN0;P50225;P50226	ST1A3_HUMAN;ST1A4_HUMAN;ST1A1_HUMAN;ST1A2_HUMAN	Filtered	0.708504	184.752			dirDIA	P31944	P31944	CASP14	Caspase-14	P31944	CASPE_HUMAN	0.453896	2092.82	2563.68
libDIA-22xlib	P11441	P11441	UBL4A	Ubiquitin-like protein 4A	P11441	UBL4A_HUMAN	Filtered	Filtered	Filtered			libDIA-6xlib	P0DMV8;P0DMV9	P0DMV8;P0DMV9	HSPA1A;HSPA1B	Heat shock 70 kDa protein 1A;Heat shock 70 kDa protein 1B	P0DMV8;P0DMV9	HS71A_HUMAN;HS71B_HUMAN	50516.1	54142.8	62724.5			dirDIA	P31946	P31946	YWHAB	14-3-3 protein beta/alpha	P31946	1433B_HUMAN	3792.77	7191.85	5670.55
libDIA-22xlib	P11498	P11498	PC	Pyruvate carboxylase, mitochondrial	P11498	PYC_HUMAN	Filtered	Filtered	Filtered			libDIA-6xlib	P10412;P16402;P16403	P10412;P16402;P16403	HIST1H1E;HIST1H1D;HIST1H1C	Histone H1.4;Histone H1.3;Histone H1.2	P10412;P16402;P16403	H14_HUMAN;H13_HUMAN;H12_HUMAN	46329	37357.8	36975.9			dirDIA	P31947	P31947	SFN	14-3-3 protein sigma	P31947	1433S_HUMAN	1959	4902.1	5023.68
libDIA-22xlib	P11586	P11586	MTHFD1	C-1-tetrahydrofolate synthase, cytoplasmic	P11586	C1TC_HUMAN	5442.5	5409.53	6968.02			libDIA-6xlib	P10515	P10515	DLAT	Dihydrolipoyllysine-residue acetyltransferase component of pyruvate dehydrogenase complex, mitochondrial	P10515	ODP2_HUMAN	Filtered	Filtered	Filtered			dirDIA	P31948	P31948	STIP1	Stress-induced-phosphoprotein 1	P31948	STIP1_HUMAN	11820.1	16862.9	18800.5
libDIA-22xlib	P11766	P11766	ADH5	Alcohol dehydrogenase class-3	P11766	ADHX_HUMAN	Filtered	Filtered	Filtered			libDIA-6xlib	P10599	P10599	TXN	Thioredoxin	P10599	THIO_HUMAN	59176.8	85323.8	57729.6			dirDIA	P31949	P31949	S100A11	Protein S100-A11	P31949	S10AB_HUMAN	8109.21	10788.6	11520.7
libDIA-22xlib	P11908;P21108;P60891	P11908;P21108;P60891	PRPS2;PRPS1L1;PRPS1	Ribose-phosphate pyrophosphokinase 2;Ribose-phosphate pyrophosphokinase 3;Ribose-phosphate pyrophosphokinase 1	P11908;P21108;P60891	PRPS2_HUMAN;PRPS3_HUMAN;PRPS1_HUMAN	Filtered	Filtered	Filtered			libDIA-6xlib	P10606	P10606	COX5B	Cytochrome c oxidase subunit 5B, mitochondrial	P10606	COX5B_HUMAN	368.656	3198.61	201.97			dirDIA	P32119	P32119	PRDX2	Peroxiredoxin-2	P32119	PRDX2_HUMAN	5346.57	10999.4	6938
libDIA-22xlib	P11940	P11940	PABPC1	Polyadenylate-binding protein 1	P11940	PABP1_HUMAN	5777.73	9567.19	7792.84			libDIA-6xlib	P10619	P10619	CTSA	Lysosomal protective protein	P10619	PPGB_HUMAN	Filtered	Filtered	Filtered			dirDIA	P32969	P32969	RPL9	60S ribosomal protein L9	P32969	RL9_HUMAN	2118.94	8141.91	3668.08
libDIA-22xlib	P12004	P12004	PCNA	Proliferating cell nuclear antigen	P12004	PCNA_HUMAN	3126.74	3976.51	4334.81			libDIA-6xlib	P10620	P10620	MGST1	Microsomal glutathione S-transferase 1	P10620	MGST1_HUMAN	4118.25	2469.83	3180.16			dirDIA	P33316	P33316	DUT	Deoxyuridine 5'-triphosphate nucleotidohydrolase, mitochondrial	P33316	DUT_HUMAN	Filtered	Filtered	Filtered
libDIA-22xlib	P12081	P12081	HARS	Histidine--tRNA ligase, cytoplasmic	P12081	SYHC_HUMAN	711.555	799.572	848.078			libDIA-6xlib	P10644	P10644	PRKAR1A	cAMP-dependent protein kinase type I-alpha regulatory subunit	P10644	KAP0_HUMAN	170.901	1.01697	1224.38			dirDIA	P33992	P33992	MCM5	DNA replication licensing factor MCM5	P33992	MCM5_HUMAN	Filtered	988.072	Filtered
libDIA-22xlib	P12236	P12236	SLC25A6	ADP/ATP translocase 3	P12236	ADT3_HUMAN	9463.13	7253.12	6588.57			libDIA-6xlib	P10768	P10768	ESD	S-formylglutathione hydrolase	P10768	ESTD_HUMAN	Filtered	Filtered	Filtered			dirDIA	P33993	P33993	MCM7	DNA replication licensing factor MCM7	P33993	MCM7_HUMAN	Filtered	463.092	Filtered
libDIA-22xlib	P12268	P12268	IMPDH2	Inosine-5'-monophosphate dehydrogenase 2	P12268	IMDH2_HUMAN	Filtered	2794.86	1743.42			libDIA-6xlib	P10809	P10809	HSPD1	60 kDa heat shock protein, mitochondrial	P10809	CH60_HUMAN	10581.8	12136.5	11721.9			dirDIA	P34897	P34897	SHMT2	Serine hydroxymethyltransferase, mitochondrial	P34897	GLYM_HUMAN	Filtered	5504.14	1953.48
libDIA-22xlib	P12270	P12270	TPR	Nucleoprotein TPR	P12270	TPR_HUMAN	204.762	Filtered	Filtered			libDIA-6xlib	P11021	P11021	HSPA5	78 kDa glucose-regulated protein	P11021	GRP78_HUMAN	3712.32	7335.04	5050.94			dirDIA	P34932	P34932	HSPA4	Heat shock 70 kDa protein 4	P34932	HSP74_HUMAN	1330.83	2538.35	2632.59
libDIA-22xlib	P12273	P12273	PIP	Prolactin-inducible protein	P12273	PIP_HUMAN	Filtered	2072.12	3742.65			libDIA-6xlib	P11142	P11142	HSPA8	Heat shock cognate 71 kDa protein	P11142	HSP7C_HUMAN	57714.7	80828.8	74911.6			dirDIA	P35030	P35030	PRSS3	Trypsin-3	P35030	TRY3_HUMAN	49799.8	55658.4	66906.3
libDIA-22xlib	P12429	P12429	ANXA3	Annexin A3	P12429	ANXA3_HUMAN	6864.52	6924.17	7795.44			libDIA-6xlib	P11166	P11166	SLC2A1	Solute carrier family 2, facilitated glucose transporter member 1	P11166	GTR1_HUMAN	Filtered	2935.36	3274.96			dirDIA	P35080	P35080	PFN2	Profilin-2	P35080	PROF2_HUMAN	6075.9	6370.63	6197.92
libDIA-22xlib	P12814	P12814	ACTN1	Alpha-actinin-1	P12814	ACTN1_HUMAN	10793.3	11665	11875.8			libDIA-6xlib	P11172	P11172	UMPS	Uridine 5'-monophosphate synthase	P11172	UMPS_HUMAN	0.764614	Filtered	644.828			dirDIA	P35232	P35232	PHB	Prohibitin	P35232	PHB_HUMAN	2041.72	3612.3	3209.55
libDIA-22xlib	P12956	P12956	XRCC6	X-ray repair cross-complementing protein 6	P12956	XRCC6_HUMAN	4493.47	5894.39	6829.4			libDIA-6xlib	P11177	P11177	PDHB	Pyruvate dehydrogenase E1 component subunit beta, mitochondrial	P11177	ODPB_HUMAN	Filtered	Filtered	1040.9			dirDIA	P35237	P35237	SERPINB6	Serpin B6	P35237	SPB6_HUMAN	0.820827	994.244	2799.21
libDIA-22xlib	P13010	P13010	XRCC5	X-ray repair cross-complementing protein 5	P13010	XRCC5_HUMAN	6716.88	7649.81	8934.67			libDIA-6xlib	P11216	P11216	PYGB	Glycogen phosphorylase, brain form	P11216	PYGB_HUMAN	2133.88	3987.6	5799.26			dirDIA	P35268	P35268	RPL22	60S ribosomal protein L22	P35268	RL22_HUMAN	10850	15081.8	16470.7
libDIA-22xlib	P13073	P13073	COX4I1	Cytochrome c oxidase subunit 4 isoform 1, mitochondrial	P13073	COX41_HUMAN	1.01812	708.208	Filtered			libDIA-6xlib	P11226	P11226	MBL2	Mannose-binding protein C	P11226	MBL2_HUMAN	31797.8	32109.7	29153.9			dirDIA	P35527	P35527	KRT9	Keratin, type I cytoskeletal 9	P35527	K1C9_HUMAN	55920.7	1.70601e+06	209009
libDIA-22xlib	P13473	P13473	LAMP2	Lysosome-associated membrane glycoprotein 2	P13473	LAMP2_HUMAN	Filtered	2957.77	995.521			libDIA-6xlib	P11234	P11234	RALB	Ras-related protein Ral-B	P11234	RALB_HUMAN	Filtered	192.553	165.401			dirDIA	P35579	P35579	MYH9	Myosin-9	P35579	MYH9_HUMAN	21262.3	23595.1	21973
libDIA-22xlib	P13489	P13489	RNH1	Ribonuclease inhibitor	P13489	RINI_HUMAN	984.389	1935.46	Filtered			libDIA-6xlib	P11279	P11279	LAMP1	Lysosome-associated membrane glycoprotein 1	P11279	LAMP1_HUMAN	3898.96	4812.11	173.057			dirDIA	P35613	P35613	BSG	Basigin	P35613	BASI_HUMAN	4419.97	3484.58	2403.08
libDIA-22xlib	P13639	P13639	EEF2	Elongation factor 2	P13639	EF2_HUMAN	32087.5	37337.6	38988			libDIA-6xlib	P11387	P11387	TOP1	DNA topoisomerase 1	P11387	TOP1_HUMAN	Filtered	Filtered	Filtered			dirDIA	P35637	P35637	FUS	RNA-binding protein FUS	P35637	FUS_HUMAN	15492.3	20790.4	17910.6
libDIA-22xlib	P13645	P13645	KRT10	Keratin, type I cytoskeletal 10	P13645	K1C10_HUMAN	291929	810286	967846			libDIA-6xlib	P11413	P11413	G6PD	Glucose-6-phosphate 1-dehydrogenase	P11413	G6PD_HUMAN	27135.8	32862.3	36865.6			dirDIA	P35908	P35908	KRT2	Keratin, type II cytoskeletal 2 epidermal	P35908	K22E_HUMAN	205949	533727	900234
libDIA-22xlib	P13646	P13646	KRT13	Keratin, type I cytoskeletal 13	P13646	K1C13_HUMAN	58048.4	155707	182446			libDIA-6xlib	P11586	P11586	MTHFD1	C-1-tetrahydrofolate synthase, cytoplasmic	P11586	C1TC_HUMAN	5637.21	5394.51	6936.3			dirDIA	P36542	P36542	ATP5C1	ATP synthase subunit gamma, mitochondrial	P36542	ATPG_HUMAN	Filtered	1341.15	Filtered
libDIA-22xlib	P13647	P13647	KRT5	Keratin, type II cytoskeletal 5	P13647	K2C5_HUMAN	28464.7	87125.7	63614.1			libDIA-6xlib	P11766	P11766	ADH5	Alcohol dehydrogenase class-3	P11766	ADHX_HUMAN	Filtered	Filtered	Filtered			dirDIA	P36578	P36578	RPL4	60S ribosomal protein L4	P36578	RL4_HUMAN	4675.35	3985.53	16296.6
libDIA-22xlib	P13667	P13667	PDIA4	Protein disulfide-isomerase A4	P13667	PDIA4_HUMAN	1443.4	2357.25	844.964			libDIA-6xlib	P11908	P11908	PRPS2	Ribose-phosphate pyrophosphokinase 2	P11908	PRPS2_HUMAN	Filtered	Filtered	Filtered			dirDIA	P36871	P36871	PGM1	Phosphoglucomutase-1	P36871	PGM1_HUMAN	1728.55	947.641	766.474
libDIA-22xlib	P13693	P13693	TPT1	Translationally-controlled tumor protein	P13693	TCTP_HUMAN	88.4271	0.801058	Filtered			libDIA-6xlib	P11940	P11940	PABPC1	Polyadenylate-binding protein 1	P11940	PABP1_HUMAN	5284.59	8870.18	6956.18			dirDIA	P36952	P36952	SERPINB5	Serpin B5	P36952	SPB5_HUMAN	641.718	2157.12	2373.69
libDIA-22xlib	P13726	P13726	F3	Tissue factor	P13726	TF_HUMAN	Filtered	Filtered	Filtered			libDIA-6xlib	P12004	P12004	PCNA	Proliferating cell nuclear antigen	P12004	PCNA_HUMAN	2734.86	2412.12	2505.39			dirDIA	P36957	P36957	DLST	Dihydrolipoyllysine-residue succinyltransferase component of 2-oxoglutarate dehydrogenase complex, mitochondrial	P36957	ODO2_HUMAN	2886.21	3065.5	5592.55
libDIA-22xlib	P13796	P13796	LCP1	Plastin-2	P13796	PLSL_HUMAN	10576.2	12426	15163.4			libDIA-6xlib	P12081	P12081	HARS	Histidine--tRNA ligase, cytoplasmic	P12081	SYHC_HUMAN	871.244	1257.07	1514.3			dirDIA	P37108	P37108	SRP14	Signal recognition particle 14 kDa protein	P37108	SRP14_HUMAN	0.479004	573.768	Filtered
libDIA-22xlib	P13797	P13797	PLS3	Plastin-3	P13797	PLST_HUMAN	8345.98	12033.6	14033.7			libDIA-6xlib	P12236	P12236	SLC25A6	ADP/ATP translocase 3	P12236	ADT3_HUMAN	9228.35	7206.77	6532.8			dirDIA	P37802	P37802	TAGLN2	Transgelin-2	P37802	TAGL2_HUMAN	5303.23	9846.66	7408.42
libDIA-22xlib	P13798	P13798	APEH	Acylamino-acid-releasing enzyme	P13798	ACPH_HUMAN	Filtered	Filtered	Filtered			libDIA-6xlib	P12268	P12268	IMPDH2	Inosine-5'-monophosphate dehydrogenase 2	P12268	IMDH2_HUMAN	2638.31	2225.34	1752.45			dirDIA	P37837	P37837	TALDO1	Transaldolase	P37837	TALDO_HUMAN	5342.33	5316.27	6162.75
libDIA-22xlib	P13804	P13804	ETFA	Electron transfer flavoprotein subunit alpha, mitochondrial	P13804	ETFA_HUMAN	Filtered	1695.84	Filtered			libDIA-6xlib	P12270	P12270	TPR	Nucleoprotein TPR	P12270	TPR_HUMAN	Filtered	Filtered	Filtered			dirDIA	P38117	P38117	ETFB	Electron transfer flavoprotein subunit beta	P38117	ETFB_HUMAN	824.786	3312.47	2162.11
libDIA-22xlib	P13861	P13861	PRKAR2A	cAMP-dependent protein kinase type II-alpha regulatory subunit	P13861	KAP2_HUMAN	Filtered	Filtered	Filtered			libDIA-6xlib	P12273	P12273	PIP	Prolactin-inducible protein	P12273	PIP_HUMAN	Filtered	Filtered	3648.42			dirDIA	P38159	P38159	RBMX	RNA-binding motif protein, X chromosome	P38159	RBMX_HUMAN	607.835	1415.65	1504.32
libDIA-22xlib	P13928;Q5VT79	P13928;Q5VT79	ANXA8;ANXA8L1	Annexin A8;Annexin A8-like protein 1	P13928;Q5VT79	ANXA8_HUMAN;AXA81_HUMAN	794.877	1835.11	2112.11			libDIA-6xlib	P12429	P12429	ANXA3	Annexin A3	P12429	ANXA3_HUMAN	7546.4	7584.5	8267.47			dirDIA	P38646	P38646	HSPA9	Stress-70 protein, mitochondrial	P38646	GRP75_HUMAN	3414.3	5558.84	5171.86
libDIA-22xlib	P13929	P13929	ENO3	Beta-enolase	P13929	ENOB_HUMAN	2716.86	995.642	4284.94			libDIA-6xlib	P12814	P12814	ACTN1	Alpha-actinin-1	P12814	ACTN1_HUMAN	12313.5	12289.2	12698.6			dirDIA	P38919	P38919	EIF4A3	Eukaryotic initiation factor 4A-III	P38919	IF4A3_HUMAN	2018.13	1731.83	1503.11
libDIA-22xlib	P13984	P13984	GTF2F2	General transcription factor IIF subunit 2	P13984	T2FB_HUMAN	Filtered	Filtered	Filtered			libDIA-6xlib	P12956	P12956	XRCC6	X-ray repair cross-complementing protein 6	P12956	XRCC6_HUMAN	4597.82	5272.78	7058.79			dirDIA	P39019	P39019	RPS19	40S ribosomal protein S19	P39019	RS19_HUMAN	5044.89	8627.17	8117.24
libDIA-22xlib	P14314	P14314	PRKCSH	Glucosidase 2 subunit beta	P14314	GLU2B_HUMAN	Filtered	1051.65	431.007			libDIA-6xlib	P13010	P13010	XRCC5	X-ray repair cross-complementing protein 5	P13010	XRCC5_HUMAN	6035.86	7450.02	7674.96			dirDIA	P39023	P39023	RPL3	60S ribosomal protein L3	P39023	RL3_HUMAN	3095.27	4757.12	4644.7
libDIA-22xlib	P14324	P14324	FDPS	Farnesyl pyrophosphate synthase	P14324	FPPS_HUMAN	Filtered	Filtered	1362.43			libDIA-6xlib	P13073	P13073	COX4I1	Cytochrome c oxidase subunit 4 isoform 1, mitochondrial	P13073	COX41_HUMAN	1949.16	311.523	197.028			dirDIA	P39656	P39656	DDOST	Dolichyl-diphosphooligosaccharide--protein glycosyltransferase 48 kDa subunit	P39656	OST48_HUMAN	764.155	1315.03	1514.64
libDIA-22xlib	P14406	P14406	COX7A2	Cytochrome c oxidase subunit 7A2, mitochondrial	P14406	CX7A2_HUMAN	2042.28	2240.09	Filtered			libDIA-6xlib	P13473	P13473	LAMP2	Lysosome-associated membrane glycoprotein 2	P13473	LAMP2_HUMAN	Filtered	2883.21	1072			dirDIA	P39687	P39687	ANP32A	Acidic leucine-rich nuclear phosphoprotein 32 family member A	P39687	AN32A_HUMAN	4009.74	3233.29	6260.98
libDIA-22xlib	P14550	P14550	AKR1A1	Alcohol dehydrogenase [NADP(+)]	P14550	AK1A1_HUMAN	Filtered	Filtered	Filtered			libDIA-6xlib	P13489	P13489	RNH1	Ribonuclease inhibitor	P13489	RINI_HUMAN	968.833	1935.63	2663.12			dirDIA	P39748	P39748	FEN1	Flap endonuclease 1	P39748	FEN1_HUMAN	5401.47	7219.41	4755.91
libDIA-22xlib	P14618	P14618	PKM	Pyruvate kinase PKM	P14618	KPYM_HUMAN	119848	155599	173698			libDIA-6xlib	P13639	P13639	EEF2	Elongation factor 2	P13639	EF2_HUMAN	32087.5	37403.8	38988			dirDIA	P40121	P40121	CAPG	Macrophage-capping protein	P40121	CAPG_HUMAN	792.456	1417.93	3892.95
libDIA-22xlib	P14625	P14625	HSP90B1	Endoplasmin	P14625	ENPL_HUMAN	8455.26	13723.8	10236.4			libDIA-6xlib	P13645	P13645	KRT10	Keratin, type I cytoskeletal 10	P13645	K1C10_HUMAN	291929	810286	967846			dirDIA	P40227	P40227	CCT6A	T-complex protein 1 subunit zeta	P40227	TCPZ_HUMAN	5574.28	7049.82	6690.4
libDIA-22xlib	P14678;P63162	P14678;P63162	SNRPB;SNRPN	Small nuclear ribonucleoprotein-associated proteins B and B';Small nuclear ribonucleoprotein-associated protein N	P14678;P63162	RSMB_HUMAN;RSMN_HUMAN	1216.94	1720.98	2265.97			libDIA-6xlib	P13646	P13646	KRT13	Keratin, type I cytoskeletal 13	P13646	K1C13_HUMAN	57950.2	155385	181723			dirDIA	P40429;Q6NVV1	P40429;Q6NVV1	RPL13A;RPL13AP3	60S ribosomal protein L13a;Putative 60S ribosomal protein L13a protein RPL13AP3	P40429;Q6NVV1	RL13A_HUMAN;R13P3_HUMAN	8971.35	12731.7	18427.7
libDIA-22xlib	P14735	P14735	IDE	Insulin-degrading enzyme	P14735	IDE_HUMAN	Filtered	0.379463	Filtered			libDIA-6xlib	P13647	P13647	KRT5	Keratin, type II cytoskeletal 5	P13647	K2C5_HUMAN	28268.4	86672.5	63119.1			dirDIA	P40925	P40925	MDH1	Malate dehydrogenase, cytoplasmic	P40925	MDHC_HUMAN	5567.84	4958.82	5865.8
libDIA-22xlib	P14866	P14866	HNRNPL	Heterogeneous nuclear ribonucleoprotein L	P14866	HNRPL_HUMAN	965.804	453.286	Filtered			libDIA-6xlib	P13667	P13667	PDIA4	Protein disulfide-isomerase A4	P13667	PDIA4_HUMAN	4328.63	2062.58	879.427			dirDIA	P40926	P40926	MDH2	Malate dehydrogenase, mitochondrial	P40926	MDHM_HUMAN	1741.84	3554.46	3834.24
libDIA-22xlib	P14868	P14868	DARS	Aspartate--tRNA ligase, cytoplasmic	P14868	SYDC_HUMAN	2000.35	1554.36	1620.61			libDIA-6xlib	P13693	P13693	TPT1	Translationally-controlled tumor protein	P13693	TCTP_HUMAN	1031.54	102.188	133.582			dirDIA	P40939	P40939	HADHA	Trifunctional enzyme subunit alpha, mitochondrial	P40939	ECHA_HUMAN	Filtered	Filtered	Filtered
libDIA-22xlib	P14923	P14923	JUP	Junction plakoglobin	P14923	PLAK_HUMAN	Filtered	5321.69	487.309			libDIA-6xlib	P13726	P13726	F3	Tissue factor	P13726	TF_HUMAN	Filtered	Filtered	Filtered			dirDIA	P41091	P41091	EIF2S3	Eukaryotic translation initiation factor 2 subunit 3	P41091	IF2G_HUMAN	761.95	1048.85	1317.87
libDIA-22xlib	P14927	P14927	UQCRB	Cytochrome b-c1 complex subunit 7	P14927	QCR7_HUMAN	Filtered	Filtered	Filtered			libDIA-6xlib	P13796	P13796	LCP1	Plastin-2	P13796	PLSL_HUMAN	8631.8	10071.8	9678.22			dirDIA	P41250	P41250	GARS	Glycine--tRNA ligase	P41250	SYG_HUMAN	1334.59	2780.99	1813.24
libDIA-22xlib	P15104	P15104	GLUL	Glutamine synthetase	P15104	GLNA_HUMAN	Filtered	0.623337	Filtered			libDIA-6xlib	P13797	P13797	PLS3	Plastin-3	P13797	PLST_HUMAN	7871.04	10231.1	11173.5			dirDIA	P41252	P41252	IARS	Isoleucine--tRNA ligase, cytoplasmic	P41252	SYIC_HUMAN	512.174	570.944	2336.86
libDIA-22xlib	P15121	P15121	AKR1B1	Aldose reductase	P15121	ALDR_HUMAN	52453.4	40541.2	28774.1			libDIA-6xlib	P13798	P13798	APEH	Acylamino-acid-releasing enzyme	P13798	ACPH_HUMAN	Filtered	Filtered	Filtered			dirDIA	P42166;P42167	P42166;P42167	TMPO	Lamina-associated polypeptide 2, isoform alpha;Lamina-associated polypeptide 2, isoforms beta/gamma	P42166;P42167	LAP2A_HUMAN;LAP2B_HUMAN	1513.16	1422.49	Filtered
libDIA-22xlib	P15144	P15144	ANPEP	Aminopeptidase N	P15144	AMPN_HUMAN	Filtered	740.333	Filtered			libDIA-6xlib	P13804	P13804	ETFA	Electron transfer flavoprotein subunit alpha, mitochondrial	P13804	ETFA_HUMAN	354.957	377.878	477.817			dirDIA	P42677	P42677	RPS27	40S ribosomal protein S27	P42677	RS27_HUMAN	1087.58	981.258	1675.07
libDIA-22xlib	P15153	P15153	RAC2	Ras-related C3 botulinum toxin substrate 2	P15153	RAC2_HUMAN	Filtered	633.845	493.306			libDIA-6xlib	P13861	P13861	PRKAR2A	cAMP-dependent protein kinase type II-alpha regulatory subunit	P13861	KAP2_HUMAN	Filtered	995.464	Filtered			dirDIA	P42704	P42704	LRPPRC	Leucine-rich PPR motif-containing protein, mitochondrial	P42704	LPPRC_HUMAN	822.045	1160.29	879.618
libDIA-22xlib	P15170;Q8IYD1	P15170;Q8IYD1	GSPT1;GSPT2	Eukaryotic peptide chain release factor GTP-binding subunit ERF3A;Eukaryotic peptide chain release factor GTP-binding subunit ERF3B	P15170;Q8IYD1	ERF3A_HUMAN;ERF3B_HUMAN	Filtered	0.632097	Filtered			libDIA-6xlib	P13928;Q5VT79	P13928;Q5VT79	ANXA8;ANXA8L1	Annexin A8;Annexin A8-like protein 1	P13928;Q5VT79	ANXA8_HUMAN;AXA81_HUMAN	521.466	1287.16	2478.51			dirDIA	P42766	P42766	RPL35	60S ribosomal protein L35	P42766	RL35_HUMAN	5377.7	9487.6	14175.5
libDIA-22xlib	P15259;P18669	P15259;P18669	PGAM2;PGAM1	Phosphoglycerate mutase 2;Phosphoglycerate mutase 1	P15259;P18669	PGAM2_HUMAN;PGAM1_HUMAN	Filtered	1188.14	650.605			libDIA-6xlib	P13929	P13929	ENO3	Beta-enolase	P13929	ENOB_HUMAN	Filtered	Filtered	Filtered			dirDIA	P43034	P43034	PAFAH1B1	Platelet-activating factor acetylhydrolase IB subunit alpha	P43034	LIS1_HUMAN	474.454	1064.94	970.37
libDIA-22xlib	P15311	P15311	EZR	Ezrin	P15311	EZRI_HUMAN	5658.28	7471.74	6571.59			libDIA-6xlib	P13984	P13984	GTF2F2	General transcription factor IIF subunit 2	P13984	T2FB_HUMAN	Filtered	Filtered	Filtered			dirDIA	P43243	P43243	MATR3	Matrin-3	P43243	MATR3_HUMAN	739.355	2052.93	1147.85
libDIA-22xlib	P15374	P15374	UCHL3	Ubiquitin carboxyl-terminal hydrolase isozyme L3	P15374	UCHL3_HUMAN	1595.96	Filtered	Filtered			libDIA-6xlib	P14314	P14314	PRKCSH	Glucosidase 2 subunit beta	P14314	GLU2B_HUMAN	Filtered	951.369	376.069			dirDIA	P43487	P43487	RANBP1	Ran-specific GTPase-activating protein	P43487	RANG_HUMAN	1130.55	2911.43	4060.84
libDIA-22xlib	P15531	P15531	NME1	Nucleoside diphosphate kinase A	P15531	NDKA_HUMAN	8541.82	8414.9	6543.27			libDIA-6xlib	P14324	P14324	FDPS	Farnesyl pyrophosphate synthase	P14324	FPPS_HUMAN	Filtered	Filtered	1400.89			dirDIA	P43490	P43490	NAMPT	Nicotinamide phosphoribosyltransferase	P43490	NAMPT_HUMAN	1250.71	3301.1	4129.96
libDIA-22xlib	P15559	P15559	NQO1	NAD(P)H dehydrogenase [quinone] 1	P15559	NQO1_HUMAN	9677.49	6965.51	6645.05			libDIA-6xlib	P14406	P14406	COX7A2	Cytochrome c oxidase subunit 7A2, mitochondrial	P14406	CX7A2_HUMAN	4262.58	4945.55	2291			dirDIA	P45880	P45880	VDAC2	Voltage-dependent anion-selective channel protein 2	P45880	VDAC2_HUMAN	7764.73	6436.44	3415.41
libDIA-22xlib	P15586	P15586	GNS	N-acetylglucosamine-6-sulfatase	P15586	GNS_HUMAN	Filtered	Filtered	Filtered			libDIA-6xlib	P14550	P14550	AKR1A1	Alcohol dehydrogenase [NADP(+)]	P14550	AK1A1_HUMAN	Filtered	Filtered	Filtered			dirDIA	P45974	P45974	USP5	Ubiquitin carboxyl-terminal hydrolase 5	P45974	UBP5_HUMAN	1578.17	2548.99	2788.1
libDIA-22xlib	P15880	P15880	RPS2	40S ribosomal protein S2	P15880	RS2_HUMAN	8927.87	12651.7	18908			libDIA-6xlib	P14618	P14618	PKM	Pyruvate kinase PKM	P14618	KPYM_HUMAN	119977	155958	173770			dirDIA	P46060	P46060	RANGAP1	Ran GTPase-activating protein 1	P46060	RAGP1_HUMAN	3455.97	1920.26	3132.1
libDIA-22xlib	P15924	P15924	DSP	Desmoplakin	P15924	DESP_HUMAN	552.292	9523.63	1515.23			libDIA-6xlib	P14625	P14625	HSP90B1	Endoplasmin	P14625	ENPL_HUMAN	8455.31	13436.5	10219.6			dirDIA	P46776	P46776	RPL27A	60S ribosomal protein L27a	P46776	RL27A_HUMAN	23040	26527.4	32809.4
libDIA-22xlib	P16070	P16070	CD44	CD44 antigen	P16070	CD44_HUMAN	4271.62	10738.1	9375.17			libDIA-6xlib	P14678;P63162	P14678;P63162	SNRPB;SNRPN	Small nuclear ribonucleoprotein-associated proteins B and B';Small nuclear ribonucleoprotein-associated protein N	P14678;P63162	RSMB_HUMAN;RSMN_HUMAN	1323.17	1281.35	1240.94			dirDIA	P46777	P46777	RPL5	60S ribosomal protein L5	P46777	RL5_HUMAN	7939.01	5911.04	702.949
libDIA-22xlib	P16083	P16083	NQO2	Ribosyldihydronicotinamide dehydrogenase [quinone]	P16083	NQO2_HUMAN	Filtered	Filtered	Filtered			libDIA-6xlib	P14735	P14735	IDE	Insulin-degrading enzyme	P14735	IDE_HUMAN	Filtered	Filtered	Filtered			dirDIA	P46778	P46778	RPL21	60S ribosomal protein L21	P46778	RL21_HUMAN	143.166	Filtered	0.64563
libDIA-22xlib	P16104;Q96QV6	P16104;Q96QV6	H2AFX;HIST1H2AA	Histone H2AX;Histone H2A type 1-A	P16104;Q96QV6	H2AX_HUMAN;H2A1A_HUMAN	341260	213985	202268			libDIA-6xlib	P14866	P14866	HNRNPL	Heterogeneous nuclear ribonucleoprotein L	P14866	HNRPL_HUMAN	1522.11	581.252	Filtered			dirDIA	P46781	P46781	RPS9	40S ribosomal protein S9	P46781	RS9_HUMAN	6844.68	10280.4	18040.1
libDIA-22xlib	P16144	P16144	ITGB4	Integrin beta-4	P16144	ITB4_HUMAN	0.958763	0.632847	Filtered			libDIA-6xlib	P14868	P14868	DARS	Aspartate--tRNA ligase, cytoplasmic	P14868	SYDC_HUMAN	236.929	847.123	744.336			dirDIA	P46782	P46782	RPS5	40S ribosomal protein S5	P46782	RS5_HUMAN	7558.85	6525.76	7427.63
libDIA-22xlib	P16152	P16152	CBR1	Carbonyl reductase [NADPH] 1	P16152	CBR1_HUMAN	1738.97	967.03	Filtered			libDIA-6xlib	P14923	P14923	JUP	Junction plakoglobin	P14923	PLAK_HUMAN	0.609272	4591.6	0.56004			dirDIA	P46783	P46783	RPS10	40S ribosomal protein S10	P46783	RS10_HUMAN	3842.02	9317.53	4441.65
libDIA-22xlib	P16401	P16401	HIST1H1B	Histone H1.5	P16401	H15_HUMAN	23240.7	31807.9	33962.2			libDIA-6xlib	P14927	P14927	UQCRB	Cytochrome b-c1 complex subunit 7	P14927	QCR7_HUMAN	Filtered	Filtered	Filtered			dirDIA	P46821	P46821	MAP1B	Microtubule-associated protein 1B	P46821	MAP1B_HUMAN	0.766777	Filtered	0.872543
libDIA-22xlib	P16435	P16435	POR	NADPH--cytochrome P450 reductase	P16435	NCPR_HUMAN	Filtered	Filtered	Filtered			libDIA-6xlib	P15104	P15104	GLUL	Glutamine synthetase	P15104	GLNA_HUMAN	Filtered	Filtered	0.636223			dirDIA	P46940	P46940	IQGAP1	Ras GTPase-activating-like protein IQGAP1	P46940	IQGA1_HUMAN	946.783	1978.18	1594.69
libDIA-22xlib	P16520;P62873;P62879	P16520;P62873;P62879	GNB3;GNB1;GNB2	Guanine nucleotide-binding protein G(I)/G(S)/G(T) subunit beta-3;Guanine nucleotide-binding protein G(I)/G(S)/G(T) subunit beta-1;Guanine nucleotide-binding protein G(I)/G(S)/G(T) subunit beta-2	P16520;P62873;P62879	GBB3_HUMAN;GBB1_HUMAN;GBB2_HUMAN	Filtered	Filtered	Filtered			libDIA-6xlib	P15121	P15121	AKR1B1	Aldose reductase	P15121	ALDR_HUMAN	53883.5	41609.9	29440.8			dirDIA	P47756	P47756	CAPZB	F-actin-capping protein subunit beta	P47756	CAPZB_HUMAN	1199.35	2369.67	10457.1
libDIA-22xlib	P16615	P16615	ATP2A2	Sarcoplasmic/endoplasmic reticulum calcium ATPase 2	P16615	AT2A2_HUMAN	Filtered	Filtered	3015.78			libDIA-6xlib	P15144	P15144	ANPEP	Aminopeptidase N	P15144	AMPN_HUMAN	Filtered	0.457558	Filtered			dirDIA	P47895	P47895	ALDH1A3	Aldehyde dehydrogenase family 1 member A3	P47895	AL1A3_HUMAN	1626.39	2952.91	3537.44
libDIA-22xlib	P16930	P16930	FAH	Fumarylacetoacetase	P16930	FAAA_HUMAN	1747.04	2458.38	Filtered			libDIA-6xlib	P15153	P15153	RAC2	Ras-related C3 botulinum toxin substrate 2	P15153	RAC2_HUMAN	9930.1	6285.17	5689.69			dirDIA	P48047	P48047	ATP5O	ATP synthase subunit O, mitochondrial	P48047	ATPO_HUMAN	92.1024	Filtered	0.465122
libDIA-22xlib	P16949	P16949	STMN1	Stathmin	P16949	STMN1_HUMAN	5221.49	8001.23	7417.37			libDIA-6xlib	P15170;Q8IYD1	P15170;Q8IYD1	GSPT1;GSPT2	Eukaryotic peptide chain release factor GTP-binding subunit ERF3A;Eukaryotic peptide chain release factor GTP-binding subunit ERF3B	P15170;Q8IYD1	ERF3A_HUMAN;ERF3B_HUMAN	Filtered	Filtered	Filtered			dirDIA	P48357	P48357	LEPR	Leptin receptor	P48357	LEPR_HUMAN	54335.6	24422.1	13538.9
libDIA-22xlib	P16989	P16989	YBX3	Y-box-binding protein 3	P16989	YBOX3_HUMAN	2153.5	2945.52	942.909			libDIA-6xlib	P15311	P15311	EZR	Ezrin	P15311	EZRI_HUMAN	21164	35048.3	45697.2			dirDIA	P48507	P48507	GCLM	Glutamate--cysteine ligase regulatory subunit	P48507	GSH0_HUMAN	3433.38	5215.83	4682.06
libDIA-22xlib	P17096	P17096	HMGA1	High mobility group protein HMG-I/HMG-Y	P17096	HMGA1_HUMAN	12335.7	14401.2	24263.5			libDIA-6xlib	P15374	P15374	UCHL3	Ubiquitin carboxyl-terminal hydrolase isozyme L3	P15374	UCHL3_HUMAN	972.207	453.477	827.086			dirDIA	P48556	P48556	PSMD8	26S proteasome non-ATPase regulatory subunit 8	P48556	PSMD8_HUMAN	3101.85	5473.84	5203.92
libDIA-22xlib	P17174	P17174	GOT1	Aspartate aminotransferase, cytoplasmic	P17174	AATC_HUMAN	Filtered	Filtered	Filtered			libDIA-6xlib	P15531	P15531	NME1	Nucleoside diphosphate kinase A	P15531	NDKA_HUMAN	8088.88	8871.89	6704.65			dirDIA	P48637	P48637	GSS	Glutathione synthetase	P48637	GSHB_HUMAN	2670.47	2364.33	2124.91
libDIA-22xlib	P17301	P17301	ITGA2	Integrin alpha-2	P17301	ITA2_HUMAN	Filtered	1712.97	2010.9			libDIA-6xlib	P15559	P15559	NQO1	NAD(P)H dehydrogenase [quinone] 1	P15559	NQO1_HUMAN	4838.93	6965.51	4039.66			dirDIA	P48643	P48643	CCT5	T-complex protein 1 subunit epsilon	P48643	TCPE_HUMAN	2784.36	4415.41	6478.29
libDIA-22xlib	P17612;P22694	P17612;P22694	PRKACA;PRKACB	cAMP-dependent protein kinase catalytic subunit alpha;cAMP-dependent protein kinase catalytic subunit beta	P17612;P22694	KAPCA_HUMAN;KAPCB_HUMAN	Filtered	Filtered	Filtered			libDIA-6xlib	P15586	P15586	GNS	N-acetylglucosamine-6-sulfatase	P15586	GNS_HUMAN	Filtered	Filtered	Filtered			dirDIA	P49207	P49207	RPL34	60S ribosomal protein L34	P49207	RL34_HUMAN	5528.85	5451.45	5403.94
libDIA-22xlib	P17655	P17655	CAPN2	Calpain-2 catalytic subunit	P17655	CAN2_HUMAN	7326.6	9192.98	6397.19			libDIA-6xlib	P15880	P15880	RPS2	40S ribosomal protein S2	P15880	RS2_HUMAN	9145.6	12808.8	18908			dirDIA	P49321	P49321	NASP	Nuclear autoantigenic sperm protein	P49321	NASP_HUMAN	248.876	718.456	458.264
libDIA-22xlib	P17676	P17676	CEBPB	CCAAT/enhancer-binding protein beta	P17676	CEBPB_HUMAN	Filtered	Filtered	Filtered			libDIA-6xlib	P15924	P15924	DSP	Desmoplakin	P15924	DESP_HUMAN	422.429	6643.32	1329.05			dirDIA	P49327	P49327	FASN	Fatty acid synthase	P49327	FAS_HUMAN	1128.65	2884	4268.44
libDIA-22xlib	P17812	P17812	CTPS1	CTP synthase 1	P17812	PYRG1_HUMAN	Filtered	1132.77	2538.12			libDIA-6xlib	P16070	P16070	CD44	CD44 antigen	P16070	CD44_HUMAN	8526.07	10729.8	9357.71			dirDIA	P49368	P49368	CCT3	T-complex protein 1 subunit gamma	P49368	TCPG_HUMAN	3012.67	4077.39	4473.95
libDIA-22xlib	P17844	P17844	DDX5	Probable ATP-dependent RNA helicase DDX5	P17844	DDX5_HUMAN	4330.08	4218.78	3457.83			libDIA-6xlib	P16083	P16083	NQO2	Ribosyldihydronicotinamide dehydrogenase [quinone]	P16083	NQO2_HUMAN	Filtered	Filtered	Filtered			dirDIA	P49411	P49411	TUFM	Elongation factor Tu, mitochondrial	P49411	EFTU_HUMAN	2273.47	2956.99	4632.63
libDIA-22xlib	P17931	P17931	LGALS3	Galectin-3	P17931	LEG3_HUMAN	3196.99	4042.72	3912.44			libDIA-6xlib	P16104;Q96QV6	P16104;Q96QV6	H2AFX;HIST1H2AA	Histone H2AX;Histone H2A type 1-A	P16104;Q96QV6	H2AX_HUMAN;H2A1A_HUMAN	341260	213985	202268			dirDIA	P49720	P49720	PSMB3	Proteasome subunit beta type-3	P49720	PSB3_HUMAN	Filtered	Filtered	Filtered
libDIA-22xlib	P17980	P17980	PSMC3	26S protease regulatory subunit 6A	P17980	PRS6A_HUMAN	113.686	625.807	2500.24			libDIA-6xlib	P16144	P16144	ITGB4	Integrin beta-4	P16144	ITB4_HUMAN	Filtered	Filtered	Filtered			dirDIA	P49721	P49721	PSMB2	Proteasome subunit beta type-2	P49721	PSB2_HUMAN	2298.01	2625.21	2435
libDIA-22xlib	P17987	P17987	TCP1	T-complex protein 1 subunit alpha	P17987	TCPA_HUMAN	3892.31	5619.74	4493.15			libDIA-6xlib	P16152	P16152	CBR1	Carbonyl reductase [NADPH] 1	P16152	CBR1_HUMAN	2550.28	3415.3	395.443			dirDIA	P49736	P49736	MCM2	DNA replication licensing factor MCM2	P49736	MCM2_HUMAN	1438.53	1749.92	2188.16
libDIA-22xlib	P18031	P18031	PTPN1	Tyrosine-protein phosphatase non-receptor type 1	P18031	PTN1_HUMAN	Filtered	Filtered	Filtered			libDIA-6xlib	P16401	P16401	HIST1H1B	Histone H1.5	P16401	H15_HUMAN	23240.6	21711.8	33962.1			dirDIA	P49748	P49748	ACADVL	Very long-chain specific acyl-CoA dehydrogenase, mitochondrial	P49748	ACADV_HUMAN	0.460716	Filtered	Filtered
libDIA-22xlib	P18077	P18077	RPL35A	60S ribosomal protein L35a	P18077	RL35A_HUMAN	6207.38	7355.7	6785.16			libDIA-6xlib	P16435	P16435	POR	NADPH--cytochrome P450 reductase	P16435	NCPR_HUMAN	Filtered	Filtered	Filtered			dirDIA	P49755	P49755	TMED10	Transmembrane emp24 domain-containing protein 10	P49755	TMEDA_HUMAN	139.065	0.806122	163.683
libDIA-22xlib	P18085	P18085	ARF4	ADP-ribosylation factor 4	P18085	ARF4_HUMAN	1213.37	1322.25	1509.04			libDIA-6xlib	P16615	P16615	ATP2A2	Sarcoplasmic/endoplasmic reticulum calcium ATPase 2	P16615	AT2A2_HUMAN	Filtered	Filtered	0.451309			dirDIA	P49915	P49915	GMPS	GMP synthase [glutamine-hydrolyzing]	P49915	GUAA_HUMAN	573.726	3200.63	2417.23
libDIA-22xlib	P18124	P18124	RPL7	60S ribosomal protein L7	P18124	RL7_HUMAN	12942.1	15137.9	15620.1			libDIA-6xlib	P16930	P16930	FAH	Fumarylacetoacetase	P16930	FAAA_HUMAN	Filtered	Filtered	Filtered			dirDIA	P50213	P50213	IDH3A	Isocitrate dehydrogenase [NAD] subunit alpha, mitochondrial	P50213	IDH3A_HUMAN	Filtered	Filtered	Filtered
libDIA-22xlib	P18206	P18206	VCL	Vinculin	P18206	VINC_HUMAN	3761.61	6202.67	5821.48			libDIA-6xlib	P16949	P16949	STMN1	Stathmin	P16949	STMN1_HUMAN	6328.97	7212.25	6000.65			dirDIA	P50395	P50395	GDI2	Rab GDP dissociation inhibitor beta	P50395	GDIB_HUMAN	3765.64	5823.12	5203.77
libDIA-22xlib	P18621	P18621	RPL17	60S ribosomal protein L17	P18621	RL17_HUMAN	6684.69	11755.6	9401.95			libDIA-6xlib	P16989	P16989	YBX3	Y-box-binding protein 3	P16989	YBOX3_HUMAN	2294.27	3171.43	1170.87			dirDIA	P50402	P50402	EMD	Emerin	P50402	EMD_HUMAN	Filtered	Filtered	0.426281
libDIA-22xlib	P18754	P18754	RCC1	Regulator of chromosome condensation	P18754	RCC1_HUMAN	2973.65	1617.56	2391.22			libDIA-6xlib	P17096	P17096	HMGA1	High mobility group protein HMG-I/HMG-Y	P17096	HMGA1_HUMAN	12249.3	14305.7	12132.4			dirDIA	P50454	P50454	SERPINH1	Serpin H1	P50454	SERPH_HUMAN	3491.22	3982.9	4539.64
libDIA-22xlib	P18859	P18859	ATP5J	ATP synthase-coupling factor 6, mitochondrial	P18859	ATP5J_HUMAN	Filtered	Filtered	Filtered			libDIA-6xlib	P17174	P17174	GOT1	Aspartate aminotransferase, cytoplasmic	P17174	AATC_HUMAN	0.963947	Filtered	Filtered			dirDIA	P50502	P50502	ST13	Hsc70-interacting protein	P50502	F10A1_HUMAN	4345.74	6715.94	8698.53
libDIA-22xlib	P19256	P19256	CD58	Lymphocyte function-associated antigen 3	P19256	LFA3_HUMAN	Filtered	Filtered	Filtered			libDIA-6xlib	P17301	P17301	ITGA2	Integrin alpha-2	P17301	ITA2_HUMAN	298.057	855.577	Filtered			dirDIA	P50914	P50914	RPL14	60S ribosomal protein L14	P50914	RL14_HUMAN	12196.5	10322.2	21313.6
libDIA-22xlib	P19338	P19338	NCL	Nucleolin	P19338	NUCL_HUMAN	23529.5	24263.1	20989.4			libDIA-6xlib	P17655	P17655	CAPN2	Calpain-2 catalytic subunit	P17655	CAN2_HUMAN	7326.4	9192.99	6397.18			dirDIA	P50990	P50990	CCT8	T-complex protein 1 subunit theta	P50990	TCPQ_HUMAN	5431.64	7983.21	9293.6
libDIA-22xlib	P19367	P19367	HK1	Hexokinase-1	P19367	HXK1_HUMAN	2766.71	3151.92	3687.83			libDIA-6xlib	P17676	P17676	CEBPB	CCAAT/enhancer-binding protein beta	P17676	CEBPB_HUMAN	Filtered	Filtered	Filtered			dirDIA	P50991	P50991	CCT4	T-complex protein 1 subunit delta	P50991	TCPD_HUMAN	3724.66	6123.15	7547.03
libDIA-22xlib	P19525	P19525	EIF2AK2	Interferon-induced, double-stranded RNA-activated protein kinase	P19525	E2AK2_HUMAN	Filtered	282.42	847.354			libDIA-6xlib	P17812	P17812	CTPS1	CTP synthase 1	P17812	PYRG1_HUMAN	Filtered	1132.7	2699.33			dirDIA	P50995	P50995	ANXA11	Annexin A11	P50995	ANX11_HUMAN	1469.73	2955.49	2965.32
libDIA-22xlib	P19623	P19623	SRM	Spermidine synthase	P19623	SPEE_HUMAN	2331.96	3505.35	3114.16			libDIA-6xlib	P17844	P17844	DDX5	Probable ATP-dependent RNA helicase DDX5	P17844	DDX5_HUMAN	2897	3510.31	3428.82			dirDIA	P51003;Q9BWT3;Q9NRJ5	P51003;Q9BWT3;Q9NRJ5	PAPOLA;PAPOLG;PAPOLB	Poly(A) polymerase alpha;Poly(A) polymerase gamma;Poly(A) polymerase beta	P51003;Q9BWT3;Q9NRJ5	PAPOA_HUMAN;PAPOG_HUMAN;PAPOB_HUMAN	34498	38555.8	13934.1
libDIA-22xlib	P20042	P20042	EIF2S2	Eukaryotic translation initiation factor 2 subunit 2	P20042	IF2B_HUMAN	Filtered	1203.95	Filtered			libDIA-6xlib	P17931	P17931	LGALS3	Galectin-3	P17931	LEG3_HUMAN	1562.72	2320.81	1772.56			dirDIA	P51114	P51114	FXR1	Fragile X mental retardation syndrome-related protein 1	P51114	FXR1_HUMAN	78.6735	900.481	868.68
libDIA-22xlib	P20073	P20073	ANXA7	Annexin A7	P20073	ANXA7_HUMAN	160.624	1413.02	3653.2			libDIA-6xlib	P17980	P17980	PSMC3	26S protease regulatory subunit 6A	P17980	PRS6A_HUMAN	2898.35	3965.45	3159.62			dirDIA	P51149	P51149	RAB7A	Ras-related protein Rab-7a	P51149	RAB7A_HUMAN	4822.45	6333.05	6120.84
libDIA-22xlib	P20290	P20290	BTF3	Transcription factor BTF3	P20290	BTF3_HUMAN	Filtered	0.69413	Filtered			libDIA-6xlib	P17987	P17987	TCP1	T-complex protein 1 subunit alpha	P17987	TCPA_HUMAN	3060.73	4923.6	4621.57			dirDIA	P51571	P51571	SSR4	Translocon-associated protein subunit delta	P51571	SSRD_HUMAN	Filtered	0.630112	Filtered
libDIA-22xlib	P20339	P20339	RAB5A	Ras-related protein Rab-5A	P20339	RAB5A_HUMAN	Filtered	Filtered	Filtered			libDIA-6xlib	P18031	P18031	PTPN1	Tyrosine-protein phosphatase non-receptor type 1	P18031	PTN1_HUMAN	Filtered	Filtered	Filtered			dirDIA	P51648	P51648	ALDH3A2	Fatty aldehyde dehydrogenase	P51648	AL3A2_HUMAN	Filtered	383.822	Filtered
libDIA-22xlib	P20340;Q9NRW1	P20340;Q9NRW1	RAB6A;RAB6B	Ras-related protein Rab-6A;Ras-related protein Rab-6B	P20340;Q9NRW1	RAB6A_HUMAN;RAB6B_HUMAN	Filtered	749.175	Filtered			libDIA-6xlib	P18077	P18077	RPL35A	60S ribosomal protein L35a	P18077	RL35A_HUMAN	6207.34	7355.71	6781.76			dirDIA	P51659	P51659	HSD17B4	Peroxisomal multifunctional enzyme type 2	P51659	DHB4_HUMAN	642.322	783.935	Filtered
libDIA-22xlib	P20618	P20618	PSMB1	Proteasome subunit beta type-1	P20618	PSB1_HUMAN	3940.32	5429.26	7020.47			libDIA-6xlib	P18085	P18085	ARF4	ADP-ribosylation factor 4	P18085	ARF4_HUMAN	989.04	1322.21	1557.77			dirDIA	P51858	P51858	HDGF	Hepatoma-derived growth factor	P51858	HDGF_HUMAN	3355.43	3670.72	2584.09
libDIA-22xlib	P20645	P20645	M6PR	Cation-dependent mannose-6-phosphate receptor	P20645	MPRD_HUMAN	0.877796	210.032	Filtered			libDIA-6xlib	P18124	P18124	RPL7	60S ribosomal protein L7	P18124	RL7_HUMAN	12499.8	16092	17348.2			dirDIA	P51991	P51991	HNRNPA3	Heterogeneous nuclear ribonucleoprotein A3	P51991	ROA3_HUMAN	2557.71	3178.77	3978.18
libDIA-22xlib	P20674	P20674	COX5A	Cytochrome c oxidase subunit 5A, mitochondrial	P20674	COX5A_HUMAN	1725.42	1067.27	1477.25			libDIA-6xlib	P18206	P18206	VCL	Vinculin	P18206	VINC_HUMAN	3711.5	5841.01	5898.39			dirDIA	P52209	P52209	PGD	6-phosphogluconate dehydrogenase, decarboxylating	P52209	6PGD_HUMAN	3446.39	3427.52	2882.53
libDIA-22xlib	P20700	P20700	LMNB1	Lamin-B1	P20700	LMNB1_HUMAN	1960.2	1843.14	1040.65			libDIA-6xlib	P18621	P18621	RPL17	60S ribosomal protein L17	P18621	RL17_HUMAN	6238.61	7772.5	9290.69			dirDIA	P52272	P52272	HNRNPM	Heterogeneous nuclear ribonucleoprotein M	P52272	HNRPM_HUMAN	592.163	967.103	1873.53
libDIA-22xlib	P20810	P20810	CAST	Calpastatin	P20810	ICAL_HUMAN	Filtered	Filtered	Filtered			libDIA-6xlib	P18669	P18669	PGAM1	Phosphoglycerate mutase 1	P18669	PGAM1_HUMAN	232.718	1188.02	650.574			dirDIA	P52565	P52565	ARHGDIA	Rho GDP-dissociation inhibitor 1	P52565	GDIR1_HUMAN	10342.1	14603.9	11965.3
libDIA-22xlib	P20962	P20962	PTMS	Parathymosin	P20962	PTMS_HUMAN	2047.34	2885.15	1667.23			libDIA-6xlib	P18754	P18754	RCC1	Regulator of chromosome condensation	P18754	RCC1_HUMAN	3158.27	1810.07	2365.26			dirDIA	P52566	P52566	ARHGDIB	Rho GDP-dissociation inhibitor 2	P52566	GDIR2_HUMAN	2402.89	5500.08	2921.69
libDIA-22xlib	P21266	P21266	GSTM3	Glutathione S-transferase Mu 3	P21266	GSTM3_HUMAN	Filtered	Filtered	Filtered			libDIA-6xlib	P18859	P18859	ATP5J	ATP synthase-coupling factor 6, mitochondrial	P18859	ATP5J_HUMAN	Filtered	Filtered	Filtered			dirDIA	P52597	P52597	HNRNPF	Heterogeneous nuclear ribonucleoprotein F	P52597	HNRPF_HUMAN	0.620739	907.273	974.714
libDIA-22xlib	P21281	P21281	ATP6V1B2	V-type proton ATPase subunit B, brain isoform	P21281	VATB2_HUMAN	Filtered	Filtered	Filtered			libDIA-6xlib	P19256	P19256	CD58	Lymphocyte function-associated antigen 3	P19256	LFA3_HUMAN	0.417046	Filtered	Filtered			dirDIA	P52815	P52815	MRPL12	39S ribosomal protein L12, mitochondrial	P52815	RM12_HUMAN	483.287	2598.71	2959.27
libDIA-22xlib	P21291	P21291	CSRP1	Cysteine and glycine-rich protein 1	P21291	CSRP1_HUMAN	Filtered	Filtered	Filtered			libDIA-6xlib	P19338	P19338	NCL	Nucleolin	P19338	NUCL_HUMAN	23529.5	24125.4	20989.4			dirDIA	P52907	P52907	CAPZA1	F-actin-capping protein subunit alpha-1	P52907	CAZA1_HUMAN	3794.92	4897.96	5624.82
libDIA-22xlib	P21333	P21333	FLNA	Filamin-A	P21333	FLNA_HUMAN	22138.5	26057.2	29537.8			libDIA-6xlib	P19367	P19367	HK1	Hexokinase-1	P19367	HXK1_HUMAN	2824.52	3196.31	2962.25			dirDIA	P53396	P53396	ACLY	ATP-citrate synthase	P53396	ACLY_HUMAN	0.454216	726.212	643.426
libDIA-22xlib	P21399	P21399	ACO1	Cytoplasmic aconitate hydratase	P21399	ACOC_HUMAN	Filtered	Filtered	Filtered			libDIA-6xlib	P19525	P19525	EIF2AK2	Interferon-induced, double-stranded RNA-activated protein kinase	P19525	E2AK2_HUMAN	Filtered	Filtered	Filtered			dirDIA	P53618	P53618	COPB1	Coatomer subunit beta	P53618	COPB_HUMAN	0.473373	0.473259	218.753
libDIA-22xlib	P21796	P21796	VDAC1	Voltage-dependent anion-selective channel protein 1	P21796	VDAC1_HUMAN	2900.45	4197.45	1887.47			libDIA-6xlib	P19623	P19623	SRM	Spermidine synthase	P19623	SPEE_HUMAN	2732.84	3548.97	7514.72			dirDIA	P53621	P53621	COPA	Coatomer subunit alpha	P53621	COPA_HUMAN	1447.81	3218.46	622.206
libDIA-22xlib	P21912	P21912	SDHB	Succinate dehydrogenase [ubiquinone] iron-sulfur subunit, mitochondrial	P21912	SDHB_HUMAN	Filtered	Filtered	Filtered			libDIA-6xlib	P19784	P19784	CSNK2A2	Casein kinase II subunit alpha'	P19784	CSK22_HUMAN	Filtered	Filtered	Filtered			dirDIA	P53999	P53999	SUB1	Activated RNA polymerase II transcriptional coactivator p15	P53999	TCP4_HUMAN	27774.2	31268.8	32089.8
libDIA-22xlib	P21926	P21926	CD9	CD9 antigen	P21926	CD9_HUMAN	0.3181	Filtered	768.305			libDIA-6xlib	P20042	P20042	EIF2S2	Eukaryotic translation initiation factor 2 subunit 2	P20042	IF2B_HUMAN	1313.73	1137.25	1579.22			dirDIA	P54136	P54136	RARS	Arginine--tRNA ligase, cytoplasmic	P54136	SYRC_HUMAN	122.034	635.014	1076.65
libDIA-22xlib	P21980	P21980	TGM2	Protein-glutamine gamma-glutamyltransferase 2	P21980	TGM2_HUMAN	25322.9	30057.7	37456.1			libDIA-6xlib	P20073	P20073	ANXA7	Annexin A7	P20073	ANXA7_HUMAN	581.892	1555.92	3653.17			dirDIA	P54578	P54578	USP14	Ubiquitin carboxyl-terminal hydrolase 14	P54578	UBP14_HUMAN	3311.29	4307.51	4883.78
libDIA-22xlib	P22059	P22059	OSBP	Oxysterol-binding protein 1	P22059	OSBP1_HUMAN	Filtered	Filtered	Filtered			libDIA-6xlib	P20290	P20290	BTF3	Transcription factor BTF3	P20290	BTF3_HUMAN	Filtered	182.542	0.618279			dirDIA	P54725	P54725	RAD23A	UV excision repair protein RAD23 homolog A	P54725	RD23A_HUMAN	3176.91	5085.33	3458.17
libDIA-22xlib	P22061	P22061	PCMT1	Protein-L-isoaspartate(D-aspartate) O-methyltransferase	P22061	PIMT_HUMAN	Filtered	941.813	545.467			libDIA-6xlib	P20339	P20339	RAB5A	Ras-related protein Rab-5A	P20339	RAB5A_HUMAN	Filtered	Filtered	Filtered			dirDIA	P54727	P54727	RAD23B	UV excision repair protein RAD23 homolog B	P54727	RD23B_HUMAN	2491.71	6064.65	4157.91
libDIA-22xlib	P22087	P22087	FBL	rRNA 2'-O-methyltransferase fibrillarin	P22087	FBRL_HUMAN	166.983	3213.44	Filtered			libDIA-6xlib	P20340	P20340	RAB6A	Ras-related protein Rab-6A	P20340	RAB6A_HUMAN	Filtered	510.667	Filtered			dirDIA	P54819	P54819	AK2	Adenylate kinase 2, mitochondrial	P54819	KAD2_HUMAN	1278.65	1026.51	2387.83
libDIA-22xlib	P22102	P22102	GART	Trifunctional purine biosynthetic protein adenosine-3	P22102	PUR2_HUMAN	5528.71	5476.64	6016.07			libDIA-6xlib	P20618	P20618	PSMB1	Proteasome subunit beta type-1	P20618	PSB1_HUMAN	2793.93	3839.02	3953.82			dirDIA	P54920	P54920	NAPA	Alpha-soluble NSF attachment protein	P54920	SNAA_HUMAN	Filtered	202.088	Filtered
libDIA-22xlib	P22234	P22234	PAICS	Multifunctional protein ADE2	P22234	PUR6_HUMAN	2550.62	3127.53	5290.92			libDIA-6xlib	P20645	P20645	M6PR	Cation-dependent mannose-6-phosphate receptor	P20645	MPRD_HUMAN	566.125	933.004	Filtered			dirDIA	P55010	P55010	EIF5	Eukaryotic translation initiation factor 5	P55010	IF5_HUMAN	4692.77	2713.51	4467.79
libDIA-22xlib	P22307	P22307	SCP2	Non-specific lipid-transfer protein	P22307	NLTP_HUMAN	564.359	Filtered	668.977			libDIA-6xlib	P20674	P20674	COX5A	Cytochrome c oxidase subunit 5A, mitochondrial	P20674	COX5A_HUMAN	727.383	Filtered	698.623			dirDIA	P55036	P55036	PSMD4	26S proteasome non-ATPase regulatory subunit 4	P55036	PSMD4_HUMAN	0.46653	Filtered	Filtered
libDIA-22xlib	P22314	P22314	UBA1	Ubiquitin-like modifier-activating enzyme 1	P22314	UBA1_HUMAN	808.591	1765.21	2450.96			libDIA-6xlib	P20700	P20700	LMNB1	Lamin-B1	P20700	LMNB1_HUMAN	2893.5	2219.65	748.149			dirDIA	P55060	P55060	CSE1L	Exportin-2	P55060	XPO2_HUMAN	2104.58	2225.36	2431.25
libDIA-22xlib	P22626	P22626	HNRNPA2B1	Heterogeneous nuclear ribonucleoproteins A2/B1	P22626	ROA2_HUMAN	59012.9	49465	34011.7			libDIA-6xlib	P20810	P20810	CAST	Calpastatin	P20810	ICAL_HUMAN	Filtered	Filtered	Filtered			dirDIA	P55072	P55072	VCP	Transitional endoplasmic reticulum ATPase	P55072	TERA_HUMAN	5866.9	6866.96	8260.04
libDIA-22xlib	P22676	P22676	CALB2	Calretinin	P22676	CALB2_HUMAN	1893.61	2125.55	3041.62			libDIA-6xlib	P20962	P20962	PTMS	Parathymosin	P20962	PTMS_HUMAN	2047.32	2885.23	1667.26			dirDIA	P55209	P55209	NAP1L1	Nucleosome assembly protein 1-like 1	P55209	NP1L1_HUMAN	3635.74	5721.52	7752.27
libDIA-22xlib	P22695	P22695	UQCRC2	Cytochrome b-c1 complex subunit 2, mitochondrial	P22695	QCR2_HUMAN	862.197	Filtered	Filtered			libDIA-6xlib	P21127;Q13882;Q9UQ88	P21127;Q13882;Q9UQ88	CDK11B;PTK6;CDK11A	Cyclin-dependent kinase 11B;Protein-tyrosine kinase 6;Cyclin-dependent kinase 11A	P21127;Q13882;Q9UQ88	CD11B_HUMAN;PTK6_HUMAN;CD11A_HUMAN	Filtered	Filtered	Filtered			dirDIA	P55263	P55263	ADK	Adenosine kinase	P55263	ADK_HUMAN	5578.2	3526.01	Filtered
libDIA-22xlib	P22735	P22735	TGM1	Protein-glutamine gamma-glutamyltransferase K	P22735	TGM1_HUMAN	Filtered	1337.39	1385.1			libDIA-6xlib	P21266	P21266	GSTM3	Glutathione S-transferase Mu 3	P21266	GSTM3_HUMAN	0.654785	0.653893	0.791725			dirDIA	P55327	P55327	TPD52	Tumor protein D52	P55327	TPD52_HUMAN	Filtered	Filtered	Filtered
libDIA-22xlib	P23229	P23229	ITGA6	Integrin alpha-6	P23229	ITA6_HUMAN	391.963	Filtered	0.412674			libDIA-6xlib	P21281	P21281	ATP6V1B2	V-type proton ATPase subunit B, brain isoform	P21281	VATB2_HUMAN	Filtered	Filtered	Filtered			dirDIA	P55769	P55769	SNU13	NHP2-like protein 1	P55769	NH2L1_HUMAN	555.778	720.095	Filtered
libDIA-22xlib	P23246	P23246	SFPQ	Splicing factor, proline- and glutamine-rich	P23246	SFPQ_HUMAN	1604.77	1992.33	2148.25			libDIA-6xlib	P21283	P21283	ATP6V1C1	V-type proton ATPase subunit C 1	P21283	VATC1_HUMAN	Filtered	Filtered	Filtered			dirDIA	P55786	P55786	NPEPPS	Puromycin-sensitive aminopeptidase	P55786	PSA_HUMAN	0.986057	684.111	799.663
libDIA-22xlib	P23284	P23284	PPIB	Peptidyl-prolyl cis-trans isomerase B	P23284	PPIB_HUMAN	2545.64	2763.78	3305.67			libDIA-6xlib	P21291	P21291	CSRP1	Cysteine and glycine-rich protein 1	P21291	CSRP1_HUMAN	Filtered	229.459	Filtered			dirDIA	P55854;P61956;Q6EEV6	P55854;P61956;Q6EEV6	SUMO3;SUMO2;SUMO4	Small ubiquitin-related modifier 3;Small ubiquitin-related modifier 2;Small ubiquitin-related modifier 4	P55854;P61956;Q6EEV6	SUMO3_HUMAN;SUMO2_HUMAN;SUMO4_HUMAN	7704.86	8026.53	7333.02
libDIA-22xlib	P23368	P23368	ME2	NAD-dependent malic enzyme, mitochondrial	P23368	MAOM_HUMAN	Filtered	Filtered	Filtered			libDIA-6xlib	P21333	P21333	FLNA	Filamin-A	P21333	FLNA_HUMAN	18697.4	21403.5	31863.1			dirDIA	P55884	P55884	EIF3B	Eukaryotic translation initiation factor 3 subunit B	P55884	EIF3B_HUMAN	3524.95	4736.77	5381.39
libDIA-22xlib	P23396	P23396	RPS3	40S ribosomal protein S3	P23396	RS3_HUMAN	18157.2	20255.3	24158.5			libDIA-6xlib	P21399	P21399	ACO1	Cytoplasmic aconitate hydratase	P21399	ACOC_HUMAN	Filtered	Filtered	Filtered			dirDIA	P55957	P55957	BID	BH3-interacting domain death agonist	P55957	BID_HUMAN	607.343	1574.73	1670.69
libDIA-22xlib	P23526	P23526	AHCY	Adenosylhomocysteinase	P23526	SAHH_HUMAN	12500	9411.25	10358.3			libDIA-6xlib	P21589	P21589	NT5E	5'-nucleotidase	P21589	5NTD_HUMAN	Filtered	Filtered	Filtered			dirDIA	P56182	P56182	RRP1	Ribosomal RNA processing protein 1 homolog A	P56182	RRP1_HUMAN	Filtered	Filtered	Filtered
libDIA-22xlib	P23528	P23528	CFL1	Cofilin-1	P23528	COF1_HUMAN	32849.2	50650.1	50557.1			libDIA-6xlib	P21796	P21796	VDAC1	Voltage-dependent anion-selective channel protein 1	P21796	VDAC1_HUMAN	2977.27	4805.29	1461.5			dirDIA	P56192	P56192	MARS	Methionine--tRNA ligase, cytoplasmic	P56192	SYMC_HUMAN	Filtered	443.895	Filtered
libDIA-22xlib	P23588	P23588	EIF4B	Eukaryotic translation initiation factor 4B	P23588	IF4B_HUMAN	Filtered	Filtered	Filtered			libDIA-6xlib	P21912	P21912	SDHB	Succinate dehydrogenase [ubiquinone] iron-sulfur subunit, mitochondrial	P21912	SDHB_HUMAN	Filtered	Filtered	Filtered			dirDIA	P56537	P56537	EIF6	Eukaryotic translation initiation factor 6	P56537	IF6_HUMAN	9720.6	5495.64	10807.5
libDIA-22xlib	P23919	P23919	DTYMK	Thymidylate kinase	P23919	KTHY_HUMAN	4228.36	6148.94	10218.9			libDIA-6xlib	P21926	P21926	CD9	CD9 antigen	P21926	CD9_HUMAN	Filtered	Filtered	Filtered			dirDIA	P59998	P59998	ARPC4	Actin-related protein 2/3 complex subunit 4	P59998	ARPC4_HUMAN	8180.28	10813	6983.35
libDIA-22xlib	P23921	P23921	RRM1	Ribonucleoside-diphosphate reductase large subunit	P23921	RIR1_HUMAN	Filtered	Filtered	Filtered			libDIA-6xlib	P21980	P21980	TGM2	Protein-glutamine gamma-glutamyltransferase 2	P21980	TGM2_HUMAN	25322.9	30057.7	37456.1			dirDIA	P60174	P60174	TPI1	Triosephosphate isomerase	P60174	TPIS_HUMAN	1462.88	1677.06	2685.39
libDIA-22xlib	P24534	P24534	EEF1B2	Elongation factor 1-beta	P24534	EF1B_HUMAN	17555.5	22982.3	13378.2			libDIA-6xlib	P22059	P22059	OSBP	Oxysterol-binding protein 1	P22059	OSBP1_HUMAN	Filtered	Filtered	Filtered			dirDIA	P60228	P60228	EIF3E	Eukaryotic translation initiation factor 3 subunit E	P60228	EIF3E_HUMAN	Filtered	Filtered	Filtered
libDIA-22xlib	P24539	P24539	ATP5F1	ATP synthase F(0) complex subunit B1, mitochondrial	P24539	AT5F1_HUMAN	524.475	1.1614	Filtered			libDIA-6xlib	P22061	P22061	PCMT1	Protein-L-isoaspartate(D-aspartate) O-methyltransferase	P22061	PIMT_HUMAN	Filtered	792.068	662.147			dirDIA	P60468	P60468	SEC61B	Protein transport protein Sec61 subunit beta	P60468	SC61B_HUMAN	Filtered	Filtered	Filtered
libDIA-22xlib	P24666	P24666	ACP1	Low molecular weight phosphotyrosine protein phosphatase	P24666	PPAC_HUMAN	4578.53	3340.31	2022.3			libDIA-6xlib	P22087	P22087	FBL	rRNA 2'-O-methyltransferase fibrillarin	P22087	FBRL_HUMAN	Filtered	Filtered	Filtered			dirDIA	P60660	P60660	MYL6	Myosin light polypeptide 6	P60660	MYL6_HUMAN	12726	18015.1	16035.7
libDIA-22xlib	P24752	P24752	ACAT1	Acetyl-CoA acetyltransferase, mitochondrial	P24752	THIL_HUMAN	Filtered	Filtered	Filtered			libDIA-6xlib	P22102	P22102	GART	Trifunctional purine biosynthetic protein adenosine-3	P22102	PUR2_HUMAN	7365.77	5860.65	8182.4			dirDIA	P60709;P63261	P60709;P63261	ACTB;ACTG1	Actin, cytoplasmic 1;Actin, cytoplasmic 2	P60709;P63261	ACTB_HUMAN;ACTG_HUMAN	462176	472650	469845
libDIA-22xlib	P24941	P24941	CDK2	Cyclin-dependent kinase 2	P24941	CDK2_HUMAN	Filtered	Filtered	Filtered			libDIA-6xlib	P22234	P22234	PAICS	Multifunctional protein ADE2	P22234	PUR6_HUMAN	2586.09	3272.78	5918.96			dirDIA	P60842	P60842	EIF4A1	Eukaryotic initiation factor 4A-I	P60842	IF4A1_HUMAN	18642.9	22142.9	24407.1
libDIA-22xlib	P25205	P25205	MCM3	DNA replication licensing factor MCM3	P25205	MCM3_HUMAN	Filtered	Filtered	1303.32			libDIA-6xlib	P22307	P22307	SCP2	Non-specific lipid-transfer protein	P22307	NLTP_HUMAN	564.369	691.262	Filtered			dirDIA	P60866	P60866	RPS20	40S ribosomal protein S20	P60866	RS20_HUMAN	5688.52	4764.74	4260.93
libDIA-22xlib	P25311	P25311	AZGP1	Zinc-alpha-2-glycoprotein	P25311	ZA2G_HUMAN	0.680878	Filtered	4255.65			libDIA-6xlib	P22314	P22314	UBA1	Ubiquitin-like modifier-activating enzyme 1	P22314	UBA1_HUMAN	923.368	1299.92	1355.48			dirDIA	P60900	P60900	PSMA6	Proteasome subunit alpha type-6	P60900	PSA6_HUMAN	1847.88	3051.2	2405.07
libDIA-22xlib	P25398	P25398	RPS12	40S ribosomal protein S12	P25398	RS12_HUMAN	5205.8	6068.3	7486.45			libDIA-6xlib	P22626	P22626	HNRNPA2B1	Heterogeneous nuclear ribonucleoproteins A2/B1	P22626	ROA2_HUMAN	58541.6	48893.9	33730.1			dirDIA	P60903	P60903	S100A10	Protein S100-A10	P60903	S10AA_HUMAN	37785.4	53861.4	72504.4
libDIA-22xlib	P25685	P25685	DNAJB1	DnaJ homolog subfamily B member 1	P25685	DNJB1_HUMAN	Filtered	Filtered	Filtered			libDIA-6xlib	P22676	P22676	CALB2	Calretinin	P22676	CALB2_HUMAN	1827.89	2510.45	1326.19			dirDIA	P60953	P60953	CDC42	Cell division control protein 42 homolog	P60953	CDC42_HUMAN	Filtered	Filtered	1295.16
libDIA-22xlib	P25705	P25705	ATP5A1	ATP synthase subunit alpha, mitochondrial	P25705	ATPA_HUMAN	9674.15	10451.7	11232.4			libDIA-6xlib	P22695	P22695	UQCRC2	Cytochrome b-c1 complex subunit 2, mitochondrial	P22695	QCR2_HUMAN	862.21	Filtered	Filtered			dirDIA	P60981	P60981	DSTN	Destrin	P60981	DEST_HUMAN	1921.82	2638.43	3138.36
libDIA-22xlib	P25786	P25786	PSMA1	Proteasome subunit alpha type-1	P25786	PSA1_HUMAN	2198.26	3193.64	3779.9			libDIA-6xlib	P23229	P23229	ITGA6	Integrin alpha-6	P23229	ITA6_HUMAN	Filtered	Filtered	0.412674			dirDIA	P61024	P61024	CKS1B	Cyclin-dependent kinases regulatory subunit 1	P61024	CKS1_HUMAN	Filtered	820.813	Filtered
libDIA-22xlib	P25787	P25787	PSMA2	Proteasome subunit alpha type-2	P25787	PSA2_HUMAN	Filtered	Filtered	Filtered			libDIA-6xlib	P23246	P23246	SFPQ	Splicing factor, proline- and glutamine-rich	P23246	SFPQ_HUMAN	1645.91	1836.63	1782.65			dirDIA	P61026	P61026	RAB10	Ras-related protein Rab-10	P61026	RAB10_HUMAN	Filtered	Filtered	Filtered
libDIA-22xlib	P25788	P25788	PSMA3	Proteasome subunit alpha type-3	P25788	PSA3_HUMAN	1846.2	2807.88	2428.36			libDIA-6xlib	P23258	P23258	TUBG1	Tubulin gamma-1 chain	P23258	TBG1_HUMAN	Filtered	Filtered	Filtered			dirDIA	P61086	P61086	UBE2K	Ubiquitin-conjugating enzyme E2 K	P61086	UBE2K_HUMAN	1430.47	2414.64	3627.52
libDIA-22xlib	P25789	P25789	PSMA4	Proteasome subunit alpha type-4	P25789	PSA4_HUMAN	5390.6	6136.43	6340.27			libDIA-6xlib	P23284	P23284	PPIB	Peptidyl-prolyl cis-trans isomerase B	P23284	PPIB_HUMAN	2486.24	2664.67	3422.91			dirDIA	P61088	P61088	UBE2N	Ubiquitin-conjugating enzyme E2 N	P61088	UBE2N_HUMAN	9199.59	11150.1	13766.5
libDIA-22xlib	P25815	P25815	S100P	Protein S100-P	P25815	S100P_HUMAN	4857.38	5694.05	Filtered			libDIA-6xlib	P23368	P23368	ME2	NAD-dependent malic enzyme, mitochondrial	P23368	MAOM_HUMAN	Filtered	Filtered	Filtered			dirDIA	P61106	P61106	RAB14	Ras-related protein Rab-14	P61106	RAB14_HUMAN	Filtered	403.57	Filtered
libDIA-22xlib	P26006	P26006	ITGA3	Integrin alpha-3	P26006	ITA3_HUMAN	Filtered	Filtered	Filtered			libDIA-6xlib	P23396	P23396	RPS3	40S ribosomal protein S3	P23396	RS3_HUMAN	17177.1	21739	24880.6			dirDIA	P61160	P61160	ACTR2	Actin-related protein 2	P61160	ARP2_HUMAN	1283.11	5387.62	Filtered
libDIA-22xlib	P26038	P26038	MSN	Moesin	P26038	MOES_HUMAN	8713.47	9906.75	8063.23			libDIA-6xlib	P23526	P23526	AHCY	Adenosylhomocysteinase	P23526	SAHH_HUMAN	12493.7	9364.24	10305.1			dirDIA	P61204;P84077;P84085	P61204;P84077;P84085	ARF3;ARF1;ARF5	ADP-ribosylation factor 3;ADP-ribosylation factor 1;ADP-ribosylation factor 5	P61204;P84077;P84085	ARF3_HUMAN;ARF1_HUMAN;ARF5_HUMAN	10403.6	11758.5	9511.57
libDIA-22xlib	P26196	P26196	DDX6	Probable ATP-dependent RNA helicase DDX6	P26196	DDX6_HUMAN	Filtered	Filtered	Filtered			libDIA-6xlib	P23528	P23528	CFL1	Cofilin-1	P23528	COF1_HUMAN	32086.1	47423.1	44801.8			dirDIA	P61221	P61221	ABCE1	ATP-binding cassette sub-family E member 1	P61221	ABCE1_HUMAN	1231.65	2612.78	1811.72
libDIA-22xlib	P26368	P26368	U2AF2	Splicing factor U2AF 65 kDa subunit	P26368	U2AF2_HUMAN	1996.63	4782.52	4684.95			libDIA-6xlib	P23588	P23588	EIF4B	Eukaryotic translation initiation factor 4B	P23588	IF4B_HUMAN	Filtered	Filtered	Filtered			dirDIA	P61224;P62834	P61224;P62834	RAP1B;RAP1A	Ras-related protein Rap-1b;Ras-related protein Rap-1A	P61224;P62834	RAP1B_HUMAN;RAP1A_HUMAN	3981.49	5306.44	3094.32
libDIA-22xlib	P26373	P26373	RPL13	60S ribosomal protein L13	P26373	RL13_HUMAN	8401.79	10628.1	9533.16			libDIA-6xlib	P23919	P23919	DTYMK	Thymidylate kinase	P23919	KTHY_HUMAN	4222.7	6148.97	10218.8			dirDIA	P61247	P61247	RPS3A	40S ribosomal protein S3a	P61247	RS3A_HUMAN	2472.73	4808.55	3948.51
libDIA-22xlib	P26447	P26447	S100A4	Protein S100-A4	P26447	S10A4_HUMAN	4091.16	2078.59	5066.48			libDIA-6xlib	P23921	P23921	RRM1	Ribonucleoside-diphosphate reductase large subunit	P23921	RIR1_HUMAN	Filtered	Filtered	Filtered			dirDIA	P61254;Q9UNX3	P61254;Q9UNX3	RPL26;RPL26L1	60S ribosomal protein L26;60S ribosomal protein L26-like 1	P61254;Q9UNX3	RL26_HUMAN;RL26L_HUMAN	15071.9	20946.8	19633.9
libDIA-22xlib	P26583	P26583	HMGB2	High mobility group protein B2	P26583	HMGB2_HUMAN	3165.32	3737.98	3685.05			libDIA-6xlib	P24534	P24534	EEF1B2	Elongation factor 1-beta	P24534	EF1B_HUMAN	15270.7	19818.7	22015.7			dirDIA	P61289	P61289	PSME3	Proteasome activator complex subunit 3	P61289	PSME3_HUMAN	Filtered	463.029	2349.76
libDIA-22xlib	P26599	P26599	PTBP1	Polypyrimidine tract-binding protein 1	P26599	PTBP1_HUMAN	9509.75	10141.3	7729.62			libDIA-6xlib	P24539	P24539	ATP5F1	ATP synthase F(0) complex subunit B1, mitochondrial	P24539	AT5F1_HUMAN	1.30412	1.1614	Filtered			dirDIA	P61313	P61313	RPL15	60S ribosomal protein L15	P61313	RL15_HUMAN	2609.75	3978.74	5353.24
libDIA-22xlib	P26639	P26639	TARS	Threonine--tRNA ligase, cytoplasmic	P26639	SYTC_HUMAN	2065.85	2156.73	3314.53			libDIA-6xlib	P24666	P24666	ACP1	Low molecular weight phosphotyrosine protein phosphatase	P24666	PPAC_HUMAN	5211.87	2561.52	2022.3			dirDIA	P61326;Q96A72	P61326;Q96A72	MAGOH;MAGOHB	Protein mago nashi homolog;Protein mago nashi homolog 2	P61326;Q96A72	MGN_HUMAN;MGN2_HUMAN	2039.38	1226.48	1743.84
libDIA-22xlib	P26640	P26640	VARS	Valine--tRNA ligase	P26640	SYVC_HUMAN	Filtered	Filtered	294.678			libDIA-6xlib	P24752	P24752	ACAT1	Acetyl-CoA acetyltransferase, mitochondrial	P24752	THIL_HUMAN	Filtered	Filtered	Filtered			dirDIA	P61353	P61353	RPL27	60S ribosomal protein L27	P61353	RL27_HUMAN	13186.2	15651.8	14438.5
libDIA-22xlib	P26641	P26641	EEF1G	Elongation factor 1-gamma	P26641	EF1G_HUMAN	15460.6	21330.2	31277			libDIA-6xlib	P25205	P25205	MCM3	DNA replication licensing factor MCM3	P25205	MCM3_HUMAN	Filtered	Filtered	3893.74			dirDIA	P61604	P61604	HSPE1	10 kDa heat shock protein, mitochondrial	P61604	CH10_HUMAN	31686.5	45684.6	37839.8
libDIA-22xlib	P26885	P26885	FKBP2	Peptidyl-prolyl cis-trans isomerase FKBP2	P26885	FKBP2_HUMAN	Filtered	Filtered	Filtered			libDIA-6xlib	P25311	P25311	AZGP1	Zinc-alpha-2-glycoprotein	P25311	ZA2G_HUMAN	465.735	Filtered	5076.28			dirDIA	P61619	P61619	SEC61A1	Protein transport protein Sec61 subunit alpha isoform 1	P61619	S61A1_HUMAN	Filtered	168.548	Filtered
libDIA-22xlib	P27348	P27348	YWHAQ	14-3-3 protein theta	P27348	1433T_HUMAN	6585.35	7310.15	9994.79			libDIA-6xlib	P25325	P25325	MPST	3-mercaptopyruvate sulfurtransferase	P25325	THTM_HUMAN	Filtered	Filtered	Filtered			dirDIA	P61803	P61803	DAD1	Dolichyl-diphosphooligosaccharide--protein glycosyltransferase subunit DAD1	P61803	DAD1_HUMAN	Filtered	Filtered	Filtered
libDIA-22xlib	P27635	P27635	RPL10	60S ribosomal protein L10	P27635	RL10_HUMAN	2531.82	2274.77	2368.32			libDIA-6xlib	P25398	P25398	RPS12	40S ribosomal protein S12	P25398	RS12_HUMAN	4967.82	5908.15	7279.1			dirDIA	P61923	P61923	COPZ1	Coatomer subunit zeta-1	P61923	COPZ1_HUMAN	1815.87	2120.35	3335.56
libDIA-22xlib	P27694	P27694	RPA1	Replication protein A 70 kDa DNA-binding subunit	P27694	RFA1_HUMAN	Filtered	Filtered	Filtered			libDIA-6xlib	P25685	P25685	DNAJB1	DnaJ homolog subfamily B member 1	P25685	DNJB1_HUMAN	Filtered	Filtered	Filtered			dirDIA	P61978	P61978	HNRNPK	Heterogeneous nuclear ribonucleoprotein K	P61978	HNRPK_HUMAN	10707.8	11647.8	12275.3
libDIA-22xlib	P27695	P27695	APEX1	DNA-(apurinic or apyrimidinic site) lyase	P27695	APEX1_HUMAN	2000.81	3035.06	1378.27			libDIA-6xlib	P25705	P25705	ATP5A1	ATP synthase subunit alpha, mitochondrial	P25705	ATPA_HUMAN	9666.32	10451.6	11197.6			dirDIA	P61981	P61981	YWHAG	14-3-3 protein gamma	P61981	1433G_HUMAN	4985.5	6879.91	7005.27
libDIA-22xlib	P27708	P27708	CAD	CAD protein	P27708	PYR1_HUMAN	484.995	1.14244	Filtered			libDIA-6xlib	P25786	P25786	PSMA1	Proteasome subunit alpha type-1	P25786	PSA1_HUMAN	2235.23	2407.65	3480.78			dirDIA	P62081	P62081	RPS7	40S ribosomal protein S7	P62081	RS7_HUMAN	5388.48	5813.49	8171.75
libDIA-22xlib	P27797	P27797	CALR	Calreticulin	P27797	CALR_HUMAN	Filtered	1148.97	883.776			libDIA-6xlib	P25787	P25787	PSMA2	Proteasome subunit alpha type-2	P25787	PSA2_HUMAN	Filtered	Filtered	Filtered			dirDIA	P62136	P62136	PPP1CA	Serine/threonine-protein phosphatase PP1-alpha catalytic subunit	P62136	PP1A_HUMAN	1189.35	2517.09	2361.76
libDIA-22xlib	P27816	P27816	MAP4	Microtubule-associated protein 4	P27816	MAP4_HUMAN	1030.34	1353.41	1215.13			libDIA-6xlib	P25788	P25788	PSMA3	Proteasome subunit alpha type-3	P25788	PSA3_HUMAN	1274.26	1873.08	2544.01			dirDIA	P62158	P62158	CALM1	Calmodulin	P62158	CALM_HUMAN	36933.7	42815.2	35591.3
libDIA-22xlib	P27824	P27824	CANX	Calnexin	P27824	CALX_HUMAN	2866.98	4760.03	2806.34			libDIA-6xlib	P25789	P25789	PSMA4	Proteasome subunit alpha type-4	P25789	PSA4_HUMAN	5062.91	6045.11	6108.6			dirDIA	P62191	P62191	PSMC1	26S protease regulatory subunit 4	P62191	PRS4_HUMAN	565.865	0.741554	378.864
libDIA-22xlib	P28062	P28062	PSMB8	Proteasome subunit beta type-8	P28062	PSB8_HUMAN	Filtered	Filtered	Filtered			libDIA-6xlib	P25815	P25815	S100P	Protein S100-P	P25815	S100P_HUMAN	3453.78	4201.83	Filtered			dirDIA	P62195	P62195	PSMC5	26S protease regulatory subunit 8	P62195	PRS8_HUMAN	259.184	751.104	1163.81
libDIA-22xlib	P28066	P28066	PSMA5	Proteasome subunit alpha type-5	P28066	PSA5_HUMAN	2925.59	4999.18	2607.79			libDIA-6xlib	P26006	P26006	ITGA3	Integrin alpha-3	P26006	ITA3_HUMAN	Filtered	Filtered	Filtered			dirDIA	P62241	P62241	RPS8	40S ribosomal protein S8	P62241	RS8_HUMAN	8177.51	11977.5	14147.1
libDIA-22xlib	P28070	P28070	PSMB4	Proteasome subunit beta type-4	P28070	PSB4_HUMAN	1.02581	Filtered	Filtered			libDIA-6xlib	P26038	P26038	MSN	Moesin	P26038	MOES_HUMAN	7652.87	7809.57	6076.52			dirDIA	P62244	P62244	RPS15A	40S ribosomal protein S15a	P62244	RS15A_HUMAN	2142.86	5643.31	4732.18
libDIA-22xlib	P28072	P28072	PSMB6	Proteasome subunit beta type-6	P28072	PSB6_HUMAN	3876.24	5846.44	4515.87			libDIA-6xlib	P26196	P26196	DDX6	Probable ATP-dependent RNA helicase DDX6	P26196	DDX6_HUMAN	Filtered	Filtered	Filtered			dirDIA	P62249	P62249	RPS16	40S ribosomal protein S16	P62249	RS16_HUMAN	9129	11661.7	15244.2
libDIA-22xlib	P28074	P28074	PSMB5	Proteasome subunit beta type-5	P28074	PSB5_HUMAN	Filtered	1025.73	604.531			libDIA-6xlib	P26358	P26358	DNMT1	DNA (cytosine-5)-methyltransferase 1	P26358	DNMT1_HUMAN	Filtered	Filtered	Filtered			dirDIA	P62258	P62258	YWHAE	14-3-3 protein epsilon	P62258	1433E_HUMAN	57332.8	58979.4	57166.8
libDIA-22xlib	P28331	P28331	NDUFS1	NADH-ubiquinone oxidoreductase 75 kDa subunit, mitochondrial	P28331	NDUS1_HUMAN	Filtered	191.446	Filtered			libDIA-6xlib	P26368	P26368	U2AF2	Splicing factor U2AF 65 kDa subunit	P26368	U2AF2_HUMAN	3266.59	6147.76	6366.93			dirDIA	P62263	P62263	RPS14	40S ribosomal protein S14	P62263	RS14_HUMAN	15219.9	12962.4	12345.6
libDIA-22xlib	P28482	P28482	MAPK1	Mitogen-activated protein kinase 1	P28482	MK01_HUMAN	Filtered	Filtered	Filtered			libDIA-6xlib	P26373	P26373	RPL13	60S ribosomal protein L13	P26373	RL13_HUMAN	8401.81	10597.6	12854.9			dirDIA	P62266	P62266	RPS23	40S ribosomal protein S23	P62266	RS23_HUMAN	1560.11	2525.84	4591.14
libDIA-22xlib	P28838	P28838	LAP3	Cytosol aminopeptidase	P28838	AMPL_HUMAN	1934.57	Filtered	886.996			libDIA-6xlib	P26447	P26447	S100A4	Protein S100-A4	P26447	S10A4_HUMAN	3601.64	1166.2	4009.48			dirDIA	P62269	P62269	RPS18	40S ribosomal protein S18	P62269	RS18_HUMAN	2441.38	3098.83	3205.95
libDIA-22xlib	P29034	P29034	S100A2	Protein S100-A2	P29034	S10A2_HUMAN	4736.32	3790.01	8299.61			libDIA-6xlib	P26583	P26583	HMGB2	High mobility group protein B2	P26583	HMGB2_HUMAN	3165.39	3752.71	3718.3			dirDIA	P62277	P62277	RPS13	40S ribosomal protein S13	P62277	RS13_HUMAN	14595.8	18770.6	22542.6
libDIA-22xlib	P29218	P29218	IMPA1	Inositol monophosphatase 1	P29218	IMPA1_HUMAN	Filtered	Filtered	Filtered			libDIA-6xlib	P26599	P26599	PTBP1	Polypyrimidine tract-binding protein 1	P26599	PTBP1_HUMAN	5859.12	7013.52	4661.7			dirDIA	P62280	P62280	RPS11	40S ribosomal protein S11	P62280	RS11_HUMAN	2842.49	5415.93	6598.63
libDIA-22xlib	P29317	P29317	EPHA2	Ephrin type-A receptor 2	P29317	EPHA2_HUMAN	Filtered	Filtered	Filtered			libDIA-6xlib	P26639	P26639	TARS	Threonine--tRNA ligase, cytoplasmic	P26639	SYTC_HUMAN	2062.16	2157.25	3315.82			dirDIA	P62304	P62304	SNRPE	Small nuclear ribonucleoprotein E	P62304	RUXE_HUMAN	Filtered	4982.48	9918.33
libDIA-22xlib	P29373	P29373	CRABP2	Cellular retinoic acid-binding protein 2	P29373	RABP2_HUMAN	Filtered	2501.02	5469.44			libDIA-6xlib	P26640	P26640	VARS	Valine--tRNA ligase	P26640	SYVC_HUMAN	Filtered	Filtered	Filtered			dirDIA	P62310	P62310	LSM3	U6 snRNA-associated Sm-like protein LSm3	P62310	LSM3_HUMAN	2311.05	2758.18	3787.33
libDIA-22xlib	P29401	P29401	TKT	Transketolase	P29401	TKT_HUMAN	7048.94	5920.89	11109.6			libDIA-6xlib	P26641	P26641	EEF1G	Elongation factor 1-gamma	P26641	EF1G_HUMAN	20960.3	28507	33946.4			dirDIA	P62314	P62314	SNRPD1	Small nuclear ribonucleoprotein Sm D1	P62314	SMD1_HUMAN	804.854	2160.79	708.547
libDIA-22xlib	P29508	P29508	SERPINB3	Serpin B3	P29508	SPB3_HUMAN	4102.23	4047.57	4753.76			libDIA-6xlib	P26885	P26885	FKBP2	Peptidyl-prolyl cis-trans isomerase FKBP2	P26885	FKBP2_HUMAN	Filtered	Filtered	4159.54			dirDIA	P62316	P62316	SNRPD2	Small nuclear ribonucleoprotein Sm D2	P62316	SMD2_HUMAN	3363.2	8517.79	6352.64
libDIA-22xlib	P29590	P29590	PML	Protein PML	P29590	PML_HUMAN	205.825	Filtered	Filtered			libDIA-6xlib	P27348	P27348	YWHAQ	14-3-3 protein theta	P27348	1433T_HUMAN	4624.47	7969.84	10948.8			dirDIA	P62318	P62318	SNRPD3	Small nuclear ribonucleoprotein Sm D3	P62318	SMD3_HUMAN	3300.48	5778.35	6728.28
libDIA-22xlib	P29692	P29692	EEF1D	Elongation factor 1-delta	P29692	EF1D_HUMAN	13306.4	18698.9	16623.7			libDIA-6xlib	P27635	P27635	RPL10	60S ribosomal protein L10	P27635	RL10_HUMAN	1266.3	2570.64	1869.7			dirDIA	P62333	P62333	PSMC6	26S protease regulatory subunit 10B	P62333	PRS10_HUMAN	402.631	976.892	Filtered
libDIA-22xlib	P29966	P29966	MARCKS	Myristoylated alanine-rich C-kinase substrate	P29966	MARCS_HUMAN	183.858	Filtered	1006.42			libDIA-6xlib	P27694	P27694	RPA1	Replication protein A 70 kDa DNA-binding subunit	P27694	RFA1_HUMAN	Filtered	Filtered	Filtered			dirDIA	P62424	P62424	RPL7A	60S ribosomal protein L7a	P62424	RL7A_HUMAN	8302.79	10369	11724.7
libDIA-22xlib	P30040	P30040	ERP29	Endoplasmic reticulum resident protein 29	P30040	ERP29_HUMAN	725.269	636.977	Filtered			libDIA-6xlib	P27695	P27695	APEX1	DNA-(apurinic or apyrimidinic site) lyase	P27695	APEX1_HUMAN	2000.77	3035.07	1378.18			dirDIA	P62491;Q15907	P62491;Q15907	RAB11A;RAB11B	Ras-related protein Rab-11A;Ras-related protein Rab-11B	P62491;Q15907	RB11A_HUMAN;RB11B_HUMAN	5214.4	6211.55	6689.13
libDIA-22xlib	P30041	P30041	PRDX6	Peroxiredoxin-6	P30041	PRDX6_HUMAN	16354	22697.5	22062.2			libDIA-6xlib	P27708	P27708	CAD	CAD protein	P27708	PYR1_HUMAN	Filtered	Filtered	Filtered			dirDIA	P62495	P62495	ETF1	Eukaryotic peptide chain release factor subunit 1	P62495	ERF1_HUMAN	1895.8	1815.97	2236.53
libDIA-22xlib	P30043	P30043	BLVRB	Flavin reductase (NADPH)	P30043	BLVRB_HUMAN	1060.15	Filtered	1878.44			libDIA-6xlib	P27797	P27797	CALR	Calreticulin	P27797	CALR_HUMAN	380.777	700.301	366.244			dirDIA	P62701	P62701	RPS4X	40S ribosomal protein S4, X isoform	P62701	RS4X_HUMAN	3864.51	6405.02	8705.52
libDIA-22xlib	P30044	P30044	PRDX5	Peroxiredoxin-5, mitochondrial	P30044	PRDX5_HUMAN	9979.97	9106.07	11368.5			libDIA-6xlib	P27816	P27816	MAP4	Microtubule-associated protein 4	P27816	MAP4_HUMAN	681.697	1358.08	1365.16			dirDIA	P62714;P67775	P62714;P67775	PPP2CB;PPP2CA	Serine/threonine-protein phosphatase 2A catalytic subunit beta isoform;Serine/threonine-protein phosphatase 2A catalytic subunit alpha isoform	P62714;P67775	PP2AB_HUMAN;PP2AA_HUMAN	3800.73	2111.54	8957.61
libDIA-22xlib	P30048	P30048	PRDX3	Thioredoxin-dependent peroxide reductase, mitochondrial	P30048	PRDX3_HUMAN	1082.59	2114.18	2110.67			libDIA-6xlib	P27824	P27824	CANX	Calnexin	P27824	CALX_HUMAN	2960.28	5183.12	2933.46			dirDIA	P62736;P63267	P62736;P63267	ACTA2;ACTG2	Actin, aortic smooth muscle;Actin, gamma-enteric smooth muscle	P62736;P63267	ACTA_HUMAN;ACTH_HUMAN	0.97831	408.942	5215.23
libDIA-22xlib	P30049	P30049	ATP5D	ATP synthase subunit delta, mitochondrial	P30049	ATPD_HUMAN	2018.25	1539.01	Filtered			libDIA-6xlib	P28062	P28062	PSMB8	Proteasome subunit beta type-8	P28062	PSB8_HUMAN	Filtered	Filtered	290.13			dirDIA	P62750	P62750	RPL23A	60S ribosomal protein L23a	P62750	RL23A_HUMAN	5859.14	7685.71	7740.86
libDIA-22xlib	P30050	P30050	RPL12	60S ribosomal protein L12	P30050	RL12_HUMAN	11334.5	22140	12720.4			libDIA-6xlib	P28066	P28066	PSMA5	Proteasome subunit alpha type-5	P28066	PSA5_HUMAN	1784.45	3364.22	2759.96			dirDIA	P62753	P62753	RPS6	40S ribosomal protein S6	P62753	RS6_HUMAN	23753.4	35034.6	38026.1
libDIA-22xlib	P30084	P30084	ECHS1	Enoyl-CoA hydratase, mitochondrial	P30084	ECHM_HUMAN	Filtered	Filtered	Filtered			libDIA-6xlib	P28070	P28070	PSMB4	Proteasome subunit beta type-4	P28070	PSB4_HUMAN	1.02581	Filtered	Filtered			dirDIA	P62805	P62805	HIST1H4A	Histone H4	P62805	H4_HUMAN	243508	156280	137263
libDIA-22xlib	P30085	P30085	CMPK1	UMP-CMP kinase	P30085	KCY_HUMAN	Filtered	2262.31	4995.86			libDIA-6xlib	P28072	P28072	PSMB6	Proteasome subunit beta type-6	P28072	PSB6_HUMAN	3876.23	5846.45	4515.89			dirDIA	P62826	P62826	RAN	GTP-binding nuclear protein Ran	P62826	RAN_HUMAN	27061.8	30710.2	17482.8
libDIA-22xlib	P30086	P30086	PEBP1	Phosphatidylethanolamine-binding protein 1	P30086	PEBP1_HUMAN	4550.27	9637.39	6290.38			libDIA-6xlib	P28074	P28074	PSMB5	Proteasome subunit beta type-5	P28074	PSB5_HUMAN	0.469419	1238.58	302.678			dirDIA	P62829	P62829	RPL23	60S ribosomal protein L23	P62829	RL23_HUMAN	2120.85	3560.07	3321.91
libDIA-22xlib	P30101	P30101	PDIA3	Protein disulfide-isomerase A3	P30101	PDIA3_HUMAN	5235.52	7839.79	8048.98			libDIA-6xlib	P28331	P28331	NDUFS1	NADH-ubiquinone oxidoreductase 75 kDa subunit, mitochondrial	P28331	NDUS1_HUMAN	Filtered	Filtered	Filtered			dirDIA	P62847	P62847	RPS24	40S ribosomal protein S24	P62847	RS24_HUMAN	475.358	Filtered	3339.49
libDIA-22xlib	P30153	P30153	PPP2R1A	Serine/threonine-protein phosphatase 2A 65 kDa regulatory subunit A alpha isoform	P30153	2AAA_HUMAN	1978.33	2199.09	4751.08			libDIA-6xlib	P28370	P28370	SMARCA1	Probable global transcription activator SNF2L1	P28370	SMCA1_HUMAN	Filtered	Filtered	Filtered			dirDIA	P62851	P62851	RPS25	40S ribosomal protein S25	P62851	RS25_HUMAN	11774.6	14041.6	17767.7
libDIA-22xlib	P30405	P30405	PPIF	Peptidyl-prolyl cis-trans isomerase F, mitochondrial	P30405	PPIF_HUMAN	Filtered	Filtered	Filtered			libDIA-6xlib	P28482	P28482	MAPK1	Mitogen-activated protein kinase 1	P28482	MK01_HUMAN	Filtered	Filtered	Filtered			dirDIA	P62854;Q5JNZ5	P62854;Q5JNZ5	RPS26;RPS26P11	40S ribosomal protein S26;Putative 40S ribosomal protein S26-like 1	P62854;Q5JNZ5	RS26_HUMAN;RS26L_HUMAN	8873.98	12412.4	10087
libDIA-22xlib	P30519	P30519	HMOX2	Heme oxygenase 2	P30519	HMOX2_HUMAN	Filtered	Filtered	Filtered			libDIA-6xlib	P28838	P28838	LAP3	Cytosol aminopeptidase	P28838	AMPL_HUMAN	1509.44	Filtered	0.550941			dirDIA	P62857	P62857	RPS28	40S ribosomal protein S28	P62857	RS28_HUMAN	6732.44	9947.22	12886.2
libDIA-22xlib	P30520	P30520	ADSS	Adenylosuccinate synthetase isozyme 2	P30520	PURA2_HUMAN	Filtered	2358.08	1298.7			libDIA-6xlib	P29034	P29034	S100A2	Protein S100-A2	P29034	S10A2_HUMAN	4659.1	3978.24	8008.89			dirDIA	P62861	P62861	FAU	40S ribosomal protein S30	P62861	RS30_HUMAN	13288.1	19840.6	21170.3
libDIA-22xlib	P30533	P30533	LRPAP1	Alpha-2-macroglobulin receptor-associated protein	P30533	AMRP_HUMAN	Filtered	0.479221	Filtered			libDIA-6xlib	P29373	P29373	CRABP2	Cellular retinoic acid-binding protein 2	P29373	RABP2_HUMAN	1736.07	1463.52	5469.42			dirDIA	P62888	P62888	RPL30	60S ribosomal protein L30	P62888	RL30_HUMAN	0.804874	763.254	430.998
libDIA-22xlib	P30566	P30566	ADSL	Adenylosuccinate lyase	P30566	PUR8_HUMAN	Filtered	408.947	Filtered			libDIA-6xlib	P29401	P29401	TKT	Transketolase	P29401	TKT_HUMAN	7048.95	5916.17	11109.7			dirDIA	P62899	P62899	RPL31	60S ribosomal protein L31	P62899	RL31_HUMAN	8172.59	10546.5	12798.3
libDIA-22xlib	P30626	P30626	SRI	Sorcin	P30626	SORCN_HUMAN	1993.27	2898.82	2339.5			libDIA-6xlib	P29508;P48594	P29508;P48594	SERPINB3;SERPINB4	Serpin B3;Serpin B4	P29508;P48594	SPB3_HUMAN;SPB4_HUMAN	726.674	2367.82	1882.62			dirDIA	P62906	P62906	RPL10A	60S ribosomal protein L10a	P62906	RL10A_HUMAN	8576.95	11044.7	10790.7
libDIA-22xlib	P30740	P30740	SERPINB1	Leukocyte elastase inhibitor	P30740	ILEU_HUMAN	343.972	1002.78	564.988			libDIA-6xlib	P29590	P29590	PML	Protein PML	P29590	PML_HUMAN	205.775	Filtered	368.652			dirDIA	P62913	P62913	RPL11	60S ribosomal protein L11	P62913	RL11_HUMAN	7750.7	12724.5	13951.8
libDIA-22xlib	P30838	P30838	ALDH3A1	Aldehyde dehydrogenase, dimeric NADP-preferring	P30838	AL3A1_HUMAN	Filtered	Filtered	Filtered			libDIA-6xlib	P29692	P29692	EEF1D	Elongation factor 1-delta	P29692	EF1D_HUMAN	13716.6	19312.5	16997.5			dirDIA	P62917	P62917	RPL8	60S ribosomal protein L8	P62917	RL8_HUMAN	1852.64	3457.14	2302.56
libDIA-22xlib	P31040	P31040	SDHA	Succinate dehydrogenase [ubiquinone] flavoprotein subunit, mitochondrial	P31040	SDHA_HUMAN	2352.29	1931.8	Filtered			libDIA-6xlib	P29966	P29966	MARCKS	Myristoylated alanine-rich C-kinase substrate	P29966	MARCS_HUMAN	Filtered	Filtered	Filtered			dirDIA	P62937	P62937	PPIA	Peptidyl-prolyl cis-trans isomerase A	P62937	PPIA_HUMAN	98336.1	119275	58162.8
libDIA-22xlib	P31150	P31150	GDI1	Rab GDP dissociation inhibitor alpha	P31150	GDIA_HUMAN	Filtered	Filtered	Filtered			libDIA-6xlib	P30040	P30040	ERP29	Endoplasmic reticulum resident protein 29	P30040	ERP29_HUMAN	725.333	1298.63	706.981			dirDIA	P62942	P62942	FKBP1A	Peptidyl-prolyl cis-trans isomerase FKBP1A	P62942	FKB1A_HUMAN	17707.6	23251.9	17853.7
libDIA-22xlib	P31151	P31151	S100A7	Protein S100-A7	P31151	S10A7_HUMAN	2389.12	2786.41	4258.75			libDIA-6xlib	P30041	P30041	PRDX6	Peroxiredoxin-6	P30041	PRDX6_HUMAN	13343.5	17667.1	16897.7			dirDIA	P63000	P63000	RAC1	Ras-related C3 botulinum toxin substrate 1	P63000	RAC1_HUMAN	9283.75	12018.7	10354.9
libDIA-22xlib	P31153	P31153	MAT2A	S-adenosylmethionine synthase isoform type-2	P31153	METK2_HUMAN	1274.95	2821.79	3569.1			libDIA-6xlib	P30043	P30043	BLVRB	Flavin reductase (NADPH)	P30043	BLVRB_HUMAN	1518.41	1110	2168.91			dirDIA	P63010;Q10567	P63010;Q10567	AP2B1;AP1B1	AP-2 complex subunit beta;AP-1 complex subunit beta-1	P63010;Q10567	AP2B1_HUMAN;AP1B1_HUMAN	561.809	187.314	770.755
libDIA-22xlib	P31689	P31689	DNAJA1	DnaJ homolog subfamily A member 1	P31689	DNJA1_HUMAN	Filtered	826.243	Filtered			libDIA-6xlib	P30044	P30044	PRDX5	Peroxiredoxin-5, mitochondrial	P30044	PRDX5_HUMAN	10676.7	10796.8	11823.1			dirDIA	P63104	P63104	YWHAZ	14-3-3 protein zeta/delta	P63104	1433Z_HUMAN	10557.4	17904.2	20126.3
libDIA-22xlib	P31930	P31930	UQCRC1	Cytochrome b-c1 complex subunit 1, mitochondrial	P31930	QCR1_HUMAN	0.615211	Filtered	98.83			libDIA-6xlib	P30048	P30048	PRDX3	Thioredoxin-dependent peroxide reductase, mitochondrial	P30048	PRDX3_HUMAN	1108.58	2396.27	2110.75			dirDIA	P63173	P63173	RPL38	60S ribosomal protein L38	P63173	RL38_HUMAN	1898.73	3826.58	1754.66
libDIA-22xlib	P31939	P31939	ATIC	Bifunctional purine biosynthesis protein PURH	P31939	PUR9_HUMAN	5346.8	5098.11	4314.68			libDIA-6xlib	P30049	P30049	ATP5D	ATP synthase subunit delta, mitochondrial	P30049	ATPD_HUMAN	1405.49	1337.83	969.699			dirDIA	P63208	P63208	SKP1	S-phase kinase-associated protein 1	P63208	SKP1_HUMAN	3589.74	5871.3	6003.01
libDIA-22xlib	P31942	P31942	HNRNPH3	Heterogeneous nuclear ribonucleoprotein H3	P31942	HNRH3_HUMAN	2050.23	1596.38	2087.71			libDIA-6xlib	P30050	P30050	RPL12	60S ribosomal protein L12	P30050	RL12_HUMAN	11233.9	22140.3	12786.2			dirDIA	P63220	P63220	RPS21	40S ribosomal protein S21	P63220	RS21_HUMAN	3638.31	3798.87	3453.19
libDIA-22xlib	P31943	P31943	HNRNPH1	Heterogeneous nuclear ribonucleoprotein H	P31943	HNRH1_HUMAN	5399.24	4695.01	6464.02			libDIA-6xlib	P30084	P30084	ECHS1	Enoyl-CoA hydratase, mitochondrial	P30084	ECHM_HUMAN	Filtered	Filtered	Filtered			dirDIA	P63241	P63241	EIF5A	Eukaryotic translation initiation factor 5A-1	P63241	IF5A1_HUMAN	6236.09	5242.14	15770.8
libDIA-22xlib	P31944	P31944	CASP14	Caspase-14	P31944	CASPE_HUMAN	2564.6	3668.68	4215.02			libDIA-6xlib	P30085	P30085	CMPK1	UMP-CMP kinase	P30085	KCY_HUMAN	2610.24	5731.65	8891.65			dirDIA	P63244	P63244	GNB2L1	Guanine nucleotide-binding protein subunit beta-2-like 1	P63244	GBLP_HUMAN	9923.02	10833.3	10367.7
libDIA-22xlib	P31946	P31946	YWHAB	14-3-3 protein beta/alpha	P31946	1433B_HUMAN	3729.29	6553.7	5147.47			libDIA-6xlib	P30086	P30086	PEBP1	Phosphatidylethanolamine-binding protein 1	P30086	PEBP1_HUMAN	4624.31	9448.87	6031.61			dirDIA	P67936	P67936	TPM4	Tropomyosin alpha-4 chain	P67936	TPM4_HUMAN	218.531	Filtered	Filtered
libDIA-22xlib	P31947	P31947	SFN	14-3-3 protein sigma	P31947	1433S_HUMAN	3403.94	5503.89	4825.06			libDIA-6xlib	P30101	P30101	PDIA3	Protein disulfide-isomerase A3	P30101	PDIA3_HUMAN	6971.75	9919.86	8838.42			dirDIA	P68104;Q5VTE0	P68104;Q5VTE0	EEF1A1;EEF1A1P5	Elongation factor 1-alpha 1;Putative elongation factor 1-alpha-like 3	P68104;Q5VTE0	EF1A1_HUMAN;EF1A3_HUMAN	212641	265397	295123
libDIA-22xlib	P31948	P31948	STIP1	Stress-induced-phosphoprotein 1	P31948	STIP1_HUMAN	12101.2	17174.9	18947.5			libDIA-6xlib	P30153	P30153	PPP2R1A	Serine/threonine-protein phosphatase 2A 65 kDa regulatory subunit A alpha isoform	P30153	2AAA_HUMAN	2549.28	2066.41	4677.73			dirDIA	P68363;Q9BQE3	P68363;Q9BQE3	TUBA1B;TUBA1C	Tubulin alpha-1B chain;Tubulin alpha-1C chain	P68363;Q9BQE3	TBA1B_HUMAN;TBA1C_HUMAN	63682.1	63411.8	63500.9
libDIA-22xlib	P31949	P31949	S100A11	Protein S100-A11	P31949	S10AB_HUMAN	8203.05	10828.9	11496.2			libDIA-6xlib	P30260	P30260	CDC27	Cell division cycle protein 27 homolog	P30260	CDC27_HUMAN	Filtered	Filtered	Filtered			dirDIA	P68366	P68366	TUBA4A	Tubulin alpha-4A chain	P68366	TBA4A_HUMAN	9196.92	9930.62	17408.6
libDIA-22xlib	P32119	P32119	PRDX2	Peroxiredoxin-2	P32119	PRDX2_HUMAN	5251.5	10295.5	7104.94			libDIA-6xlib	P30405	P30405	PPIF	Peptidyl-prolyl cis-trans isomerase F, mitochondrial	P30405	PPIF_HUMAN	Filtered	Filtered	Filtered			dirDIA	P68371	P68371	TUBB4B	Tubulin beta-4B chain	P68371	TBB4B_HUMAN	28487.5	36225.2	35472.8
libDIA-22xlib	P32321	P32321	DCTD	Deoxycytidylate deaminase	P32321	DCTD_HUMAN	Filtered	Filtered	Filtered			libDIA-6xlib	P30519	P30519	HMOX2	Heme oxygenase 2	P30519	HMOX2_HUMAN	Filtered	Filtered	Filtered			dirDIA	P68402	P68402	PAFAH1B2	Platelet-activating factor acetylhydrolase IB subunit beta	P68402	PA1B2_HUMAN	2128.14	3294.56	6323.43
libDIA-22xlib	P32969	P32969	RPL9	60S ribosomal protein L9	P32969	RL9_HUMAN	3432.48	8141.91	5460.63			libDIA-6xlib	P30520	P30520	ADSS	Adenylosuccinate synthetase isozyme 2	P30520	PURA2_HUMAN	Filtered	2584.97	1965.05			dirDIA	P68431;P84243;Q16695;Q6NXT2;Q71DI3	P68431;P84243;Q16695;Q6NXT2;Q71DI3	HIST1H3A;H3F3A;HIST3H3;H3F3C;HIST2H3A	Histone H3.1;Histone H3.3;Histone H3.1t;Histone H3.3C;Histone H3.2	P68431;P84243;Q16695;Q6NXT2;Q71DI3	H31_HUMAN;H33_HUMAN;H31T_HUMAN;H3C_HUMAN;H32_HUMAN	138393	87867.7	69004.7
libDIA-22xlib	P33176	P33176	KIF5B	Kinesin-1 heavy chain	P33176	KINH_HUMAN	Filtered	Filtered	Filtered			libDIA-6xlib	P30533	P30533	LRPAP1	Alpha-2-macroglobulin receptor-associated protein	P30533	AMRP_HUMAN	Filtered	Filtered	3163.64			dirDIA	P78347	P78347	GTF2I	General transcription factor II-I	P78347	GTF2I_HUMAN	233.572	363.433	268.709
libDIA-22xlib	P33240;Q9H0L4	P33240;Q9H0L4	CSTF2;CSTF2T	Cleavage stimulation factor subunit 2;Cleavage stimulation factor subunit 2 tau variant	P33240;Q9H0L4	CSTF2_HUMAN;CSTFT_HUMAN	Filtered	Filtered	Filtered			libDIA-6xlib	P30566	P30566	ADSL	Adenylosuccinate lyase	P30566	PUR8_HUMAN	Filtered	Filtered	Filtered			dirDIA	P78371	P78371	CCT2	T-complex protein 1 subunit beta	P78371	TCPB_HUMAN	1858.59	2280.16	1142.35
libDIA-22xlib	P33316	P33316	DUT	Deoxyuridine 5'-triphosphate nucleotidohydrolase, mitochondrial	P33316	DUT_HUMAN	Filtered	Filtered	Filtered			libDIA-6xlib	P30626	P30626	SRI	Sorcin	P30626	SORCN_HUMAN	3432.11	4875.73	3978.08			dirDIA	P78395	P78395	PRAME	Melanoma antigen preferentially expressed in tumors	P78395	PRAME_HUMAN	63838.4	69767.7	61004.4
libDIA-22xlib	P33991	P33991	MCM4	DNA replication licensing factor MCM4	P33991	MCM4_HUMAN	Filtered	997.398	Filtered			libDIA-6xlib	P30740	P30740	SERPINB1	Leukocyte elastase inhibitor	P30740	ILEU_HUMAN	354.697	1258.59	518.483			dirDIA	P78417	P78417	GSTO1	Glutathione S-transferase omega-1	P78417	GSTO1_HUMAN	2233.66	993.441	1867.25
libDIA-22xlib	P33992	P33992	MCM5	DNA replication licensing factor MCM5	P33992	MCM5_HUMAN	0.405075	1207.15	Filtered			libDIA-6xlib	P30838	P30838	ALDH3A1	Aldehyde dehydrogenase, dimeric NADP-preferring	P30838	AL3A1_HUMAN	0.61639	Filtered	890.552			dirDIA	P78527	P78527	PRKDC	DNA-dependent protein kinase catalytic subunit	P78527	PRKDC_HUMAN	Filtered	Filtered	Filtered
libDIA-22xlib	P33993	P33993	MCM7	DNA replication licensing factor MCM7	P33993	MCM7_HUMAN	150.418	Filtered	1211.12			libDIA-6xlib	P30876	P30876	POLR2B	DNA-directed RNA polymerase II subunit RPB2	P30876	RPB2_HUMAN	Filtered	Filtered	Filtered			dirDIA	P80188	P80188	LCN2	Neutrophil gelatinase-associated lipocalin	P80188	NGAL_HUMAN	102.984	795.586	Filtered
libDIA-22xlib	P34896	P34896	SHMT1	Serine hydroxymethyltransferase, cytosolic	P34896	GLYC_HUMAN	Filtered	Filtered	Filtered			libDIA-6xlib	P31040	P31040	SDHA	Succinate dehydrogenase [ubiquinone] flavoprotein subunit, mitochondrial	P31040	SDHA_HUMAN	2435.54	1931.77	17027.5			dirDIA	P81605	P81605	DCD	Dermcidin	P81605	DCD_HUMAN	26111.6	22516.9	18678.1
libDIA-22xlib	P34897	P34897	SHMT2	Serine hydroxymethyltransferase, mitochondrial	P34897	GLYM_HUMAN	790.109	1359.93	1198.02			libDIA-6xlib	P31150	P31150	GDI1	Rab GDP dissociation inhibitor alpha	P31150	GDIA_HUMAN	Filtered	Filtered	Filtered			dirDIA	P83731	P83731	RPL24	60S ribosomal protein L24	P83731	RL24_HUMAN	4673.82	3796.17	2869.55
libDIA-22xlib	P34932	P34932	HSPA4	Heat shock 70 kDa protein 4	P34932	HSP74_HUMAN	2873.14	3659.83	3634.4			libDIA-6xlib	P31151	P31151	S100A7	Protein S100-A7	P31151	S10A7_HUMAN	2389.1	2786.35	4258.71			dirDIA	P84103	P84103	SRSF3	Serine/arginine-rich splicing factor 3	P84103	SRSF3_HUMAN	10749.1	7923.36	18030
libDIA-22xlib	P35030	P35030	PRSS3	Trypsin-3	P35030	TRY3_HUMAN	47935.6	53834.6	64143			libDIA-6xlib	P31153	P31153	MAT2A	S-adenosylmethionine synthase isoform type-2	P31153	METK2_HUMAN	1647.48	3042.86	3889.6			dirDIA	Q00325	Q00325	SLC25A3	Phosphate carrier protein, mitochondrial	Q00325	MPCP_HUMAN	0.526909	Filtered	Filtered
libDIA-22xlib	P35080	P35080	PFN2	Profilin-2	P35080	PROF2_HUMAN	4292.45	4448.34	6197.88			libDIA-6xlib	P31689	P31689	DNAJA1	DnaJ homolog subfamily A member 1	P31689	DNJA1_HUMAN	Filtered	Filtered	Filtered			dirDIA	Q00341	Q00341	HDLBP	Vigilin	Q00341	VIGLN_HUMAN	341.22	436.088	911.729
libDIA-22xlib	P35222	P35222	CTNNB1	Catenin beta-1	P35222	CTNB1_HUMAN	Filtered	Filtered	Filtered			libDIA-6xlib	P31930	P31930	UQCRC1	Cytochrome b-c1 complex subunit 1, mitochondrial	P31930	QCR1_HUMAN	851.479	1776.83	196.672			dirDIA	Q00610	Q00610	CLTC	Clathrin heavy chain 1	Q00610	CLH1_HUMAN	2236.52	3348.41	4076.77
libDIA-22xlib	P35232	P35232	PHB	Prohibitin	P35232	PHB_HUMAN	3329.54	5241.02	4464.1			libDIA-6xlib	P31939	P31939	ATIC	Bifunctional purine biosynthesis protein PURH	P31939	PUR9_HUMAN	5600.56	5305.91	4023.6			dirDIA	Q00839	Q00839	HNRNPU	Heterogeneous nuclear ribonucleoprotein U	Q00839	HNRPU_HUMAN	4681.57	4939.45	5133.03
libDIA-22xlib	P35237	P35237	SERPINB6	Serpin B6	P35237	SPB6_HUMAN	0.820827	744.331	5538.8			libDIA-6xlib	P31942	P31942	HNRNPH3	Heterogeneous nuclear ribonucleoprotein H3	P31942	HNRH3_HUMAN	1556.96	2472.47	2087.73			dirDIA	Q01082	Q01082	SPTBN1	Spectrin beta chain, non-erythrocytic 1	Q01082	SPTB2_HUMAN	1525.2	1220.06	1560.26
libDIA-22xlib	P35241	P35241	RDX	Radixin	P35241	RADI_HUMAN	19808.1	34123.4	44517			libDIA-6xlib	P31943	P31943	HNRNPH1	Heterogeneous nuclear ribonucleoprotein H	P31943	HNRH1_HUMAN	3616.63	4650.94	6097.13			dirDIA	Q01105	Q01105	SET	Protein SET	Q01105	SET_HUMAN	6341.61	11947.9	13485
libDIA-22xlib	P35249	P35249	RFC4	Replication factor C subunit 4	P35249	RFC4_HUMAN	Filtered	Filtered	Filtered			libDIA-6xlib	P31944	P31944	CASP14	Caspase-14	P31944	CASPE_HUMAN	2572.26	3753.21	4326.12			dirDIA	Q01518	Q01518	CAP1	Adenylyl cyclase-associated protein 1	Q01518	CAP1_HUMAN	2576.68	4193.02	8019.4
libDIA-22xlib	P35250	P35250	RFC2	Replication factor C subunit 2	P35250	RFC2_HUMAN	Filtered	Filtered	Filtered			libDIA-6xlib	P31946	P31946	YWHAB	14-3-3 protein beta/alpha	P31946	1433B_HUMAN	11019.1	13002.8	5559.1			dirDIA	Q01813	Q01813	PFKP	ATP-dependent 6-phosphofructokinase, platelet type	Q01813	PFKAP_HUMAN	2396.36	4290.21	2973.75
libDIA-22xlib	P35268	P35268	RPL22	60S ribosomal protein L22	P35268	RL22_HUMAN	11498.1	15081.8	16470.7			libDIA-6xlib	P31947	P31947	SFN	14-3-3 protein sigma	P31947	1433S_HUMAN	2821.32	4902.13	4992.61			dirDIA	Q02413	Q02413	DSG1	Desmoglein-1	Q02413	DSG1_HUMAN	733.337	2065.13	3619.79
libDIA-22xlib	P35270	P35270	SPR	Sepiapterin reductase	P35270	SPRE_HUMAN	Filtered	Filtered	Filtered			libDIA-6xlib	P31948	P31948	STIP1	Stress-induced-phosphoprotein 1	P31948	STIP1_HUMAN	11739.1	16861	18553.1			dirDIA	Q02790	Q02790	FKBP4	Peptidyl-prolyl cis-trans isomerase FKBP4	Q02790	FKBP4_HUMAN	8918.71	14508.1	13531.3
libDIA-22xlib	P35527	P35527	KRT9	Keratin, type I cytoskeletal 9	P35527	K1C9_HUMAN	57987.1	1.67437e+06	201322			libDIA-6xlib	P31949	P31949	S100A11	Protein S100-A11	P31949	S10AB_HUMAN	8185.75	10828.9	11520.7			dirDIA	Q02878	Q02878	RPL6	60S ribosomal protein L6	Q02878	RL6_HUMAN	11465.4	12587.6	14919.5
libDIA-22xlib	P35579	P35579	MYH9	Myosin-9	P35579	MYH9_HUMAN	22370.2	24076.1	22360.9			libDIA-6xlib	P32119	P32119	PRDX2	Peroxiredoxin-2	P32119	PRDX2_HUMAN	4811.88	9413.38	6297.81			dirDIA	Q03135	Q03135	CAV1	Caveolin-1	Q03135	CAV1_HUMAN	5102.82	9332.79	5270.26
libDIA-22xlib	P35606	P35606	COPB2	Coatomer subunit beta'	P35606	COPB2_HUMAN	1641.29	2226.61	1737.5			libDIA-6xlib	P32321	P32321	DCTD	Deoxycytidylate deaminase	P32321	DCTD_HUMAN	Filtered	Filtered	Filtered			dirDIA	Q03252	Q03252	LMNB2	Lamin-B2	Q03252	LMNB2_HUMAN	4287.14	10308.2	3913.36
libDIA-22xlib	P35613	P35613	BSG	Basigin	P35613	BASI_HUMAN	3244.06	3104.12	2499.24			libDIA-6xlib	P32969	P32969	RPL9	60S ribosomal protein L9	P32969	RL9_HUMAN	6355.62	8196.59	5036.69			dirDIA	Q04323	Q04323	UBXN1	UBX domain-containing protein 1	Q04323	UBXN1_HUMAN	Filtered	850.537	1346.7
libDIA-22xlib	P35637	P35637	FUS	RNA-binding protein FUS	P35637	FUS_HUMAN	17219.7	20636.4	17993			libDIA-6xlib	P33176	P33176	KIF5B	Kinesin-1 heavy chain	P33176	KINH_HUMAN	Filtered	Filtered	Filtered			dirDIA	Q04637	Q04637	EIF4G1	Eukaryotic translation initiation factor 4 gamma 1	Q04637	IF4G1_HUMAN	Filtered	Filtered	Filtered
libDIA-22xlib	P35659	P35659	DEK	Protein DEK	P35659	DEK_HUMAN	Filtered	Filtered	Filtered			libDIA-6xlib	P33240	P33240	CSTF2	Cleavage stimulation factor subunit 2	P33240	CSTF2_HUMAN	Filtered	Filtered	Filtered			dirDIA	Q04695	Q04695	KRT17	Keratin, type I cytoskeletal 17	Q04695	K1C17_HUMAN	Filtered	Filtered	Filtered
libDIA-22xlib	P35754	P35754	GLRX	Glutaredoxin-1	P35754	GLRX1_HUMAN	Filtered	211.868	Filtered			libDIA-6xlib	P33316	P33316	DUT	Deoxyuridine 5'-triphosphate nucleotidohydrolase, mitochondrial	P33316	DUT_HUMAN	Filtered	200.217	Filtered			dirDIA	Q04760	Q04760	GLO1	Lactoylglutathione lyase	Q04760	LGUL_HUMAN	Filtered	3051.65	Filtered
libDIA-22xlib	P35813	P35813	PPM1A	Protein phosphatase 1A	P35813	PPM1A_HUMAN	Filtered	1748.43	Filtered			libDIA-6xlib	P33552	P33552	CKS2	Cyclin-dependent kinases regulatory subunit 2	P33552	CKS2_HUMAN	Filtered	Filtered	Filtered			dirDIA	Q04828	Q04828	AKR1C1	Aldo-keto reductase family 1 member C1	Q04828	AK1C1_HUMAN	79311.8	78474.4	82139
libDIA-22xlib	P35908	P35908	KRT2	Keratin, type II cytoskeletal 2 epidermal	P35908	K22E_HUMAN	373718	1.52582e+06	1.27912e+06			libDIA-6xlib	P33991	P33991	MCM4	DNA replication licensing factor MCM4	P33991	MCM4_HUMAN	Filtered	Filtered	Filtered			dirDIA	Q04917	Q04917	YWHAH	14-3-3 protein eta	Q04917	1433F_HUMAN	6305.48	7184.19	5939.83
libDIA-22xlib	P35998	P35998	PSMC2	26S protease regulatory subunit 7	P35998	PRS7_HUMAN	Filtered	592.945	1618.9			libDIA-6xlib	P33992	P33992	MCM5	DNA replication licensing factor MCM5	P33992	MCM5_HUMAN	Filtered	1175.42	Filtered			dirDIA	Q05639	Q05639	EEF1A2	Elongation factor 1-alpha 2	Q05639	EF1A2_HUMAN	1392.43	Filtered	2229.29
libDIA-22xlib	P36507	P36507	MAP2K2	Dual specificity mitogen-activated protein kinase kinase 2	P36507	MP2K2_HUMAN	Filtered	Filtered	Filtered			libDIA-6xlib	P33993	P33993	MCM7	DNA replication licensing factor MCM7	P33993	MCM7_HUMAN	2140.57	1819.18	926.162			dirDIA	Q05682	Q05682	CALD1	Caldesmon	Q05682	CALD1_HUMAN	0.653435	0.792721	0.865746
libDIA-22xlib	P36542	P36542	ATP5C1	ATP synthase subunit gamma, mitochondrial	P36542	ATPG_HUMAN	831.64	1249.84	Filtered			libDIA-6xlib	P34896	P34896	SHMT1	Serine hydroxymethyltransferase, cytosolic	P34896	GLYC_HUMAN	Filtered	Filtered	Filtered			dirDIA	Q06210	Q06210	GFPT1	Glutamine--fructose-6-phosphate aminotransferase [isomerizing] 1	Q06210	GFPT1_HUMAN	Filtered	Filtered	Filtered
libDIA-22xlib	P36551	P36551	CPOX	Oxygen-dependent coproporphyrinogen-III oxidase, mitochondrial	P36551	HEM6_HUMAN	Filtered	Filtered	Filtered			libDIA-6xlib	P34897	P34897	SHMT2	Serine hydroxymethyltransferase, mitochondrial	P34897	GLYM_HUMAN	917.205	1359.92	1526.6			dirDIA	Q06323	Q06323	PSME1	Proteasome activator complex subunit 1	Q06323	PSME1_HUMAN	1465.73	3003.1	4404.16
libDIA-22xlib	P36578	P36578	RPL4	60S ribosomal protein L4	P36578	RL4_HUMAN	4666.74	2609.2	4055.87			libDIA-6xlib	P34932	P34932	HSPA4	Heat shock 70 kDa protein 4	P34932	HSP74_HUMAN	3253.52	4193.31	4033.12			dirDIA	Q06830	Q06830	PRDX1	Peroxiredoxin-1	Q06830	PRDX1_HUMAN	114306	158380	163047
libDIA-22xlib	P36871	P36871	PGM1	Phosphoglucomutase-1	P36871	PGM1_HUMAN	3384.97	1367.2	766.492			libDIA-6xlib	P35030	P35030	PRSS3	Trypsin-3	P35030	TRY3_HUMAN	50226.3	55658.4	66906.3			dirDIA	Q07020	Q07020	RPL18	60S ribosomal protein L18	Q07020	RL18_HUMAN	0.869202	1923.02	1750.19
libDIA-22xlib	P36873	P36873	PPP1CC	Serine/threonine-protein phosphatase PP1-gamma catalytic subunit	P36873	PP1G_HUMAN	Filtered	Filtered	Filtered			libDIA-6xlib	P35080	P35080	PFN2	Profilin-2	P35080	PROF2_HUMAN	6402.15	6370.63	6427.15			dirDIA	Q07021	Q07021	C1QBP	Complement component 1 Q subcomponent-binding protein, mitochondrial	Q07021	C1QBP_HUMAN	254.764	4491.77	8259.68
libDIA-22xlib	P36915	P36915	GNL1	Guanine nucleotide-binding protein-like 1	P36915	GNL1_HUMAN	Filtered	Filtered	Filtered			libDIA-6xlib	P35222	P35222	CTNNB1	Catenin beta-1	P35222	CTNB1_HUMAN	Filtered	Filtered	Filtered			dirDIA	Q07065	Q07065	CKAP4	Cytoskeleton-associated protein 4	Q07065	CKAP4_HUMAN	2349.71	2477.36	4029.59
libDIA-22xlib	P36952	P36952	SERPINB5	Serpin B5	P36952	SPB5_HUMAN	1532.68	1308.05	2304.42			libDIA-6xlib	P35232	P35232	PHB	Prohibitin	P35232	PHB_HUMAN	2783.46	4217.25	3648.78			dirDIA	Q07157	Q07157	TJP1	Tight junction protein ZO-1	Q07157	ZO1_HUMAN	Filtered	Filtered	Filtered
libDIA-22xlib	P36957	P36957	DLST	Dihydrolipoyllysine-residue succinyltransferase component of 2-oxoglutarate dehydrogenase complex, mitochondrial	P36957	ODO2_HUMAN	2640.71	3470.33	4165.75			libDIA-6xlib	P35237	P35237	SERPINB6	Serpin B6	P35237	SPB6_HUMAN	2049.2	1988.04	5538.82			dirDIA	Q07666	Q07666	KHDRBS1	KH domain-containing, RNA-binding, signal transduction-associated protein 1	Q07666	KHDR1_HUMAN	2271.3	1227.02	2564.12
libDIA-22xlib	P37108	P37108	SRP14	Signal recognition particle 14 kDa protein	P37108	SRP14_HUMAN	Filtered	Filtered	Filtered			libDIA-6xlib	P35241	P35241	RDX	Radixin	P35241	RADI_HUMAN	Filtered	Filtered	Filtered			dirDIA	Q07955	Q07955	SRSF1	Serine/arginine-rich splicing factor 1	Q07955	SRSF1_HUMAN	4422.13	6661.35	5146.73
libDIA-22xlib	P37198	P37198	NUP62	Nuclear pore glycoprotein p62	P37198	NUP62_HUMAN	Filtered	Filtered	Filtered			libDIA-6xlib	P35249	P35249	RFC4	Replication factor C subunit 4	P35249	RFC4_HUMAN	Filtered	Filtered	Filtered			dirDIA	Q08188	Q08188	TGM3	Protein-glutamine gamma-glutamyltransferase E	Q08188	TGM3_HUMAN	0.884605	5393.86	2532.66
libDIA-22xlib	P37235	P37235	HPCAL1	Hippocalcin-like protein 1	P37235	HPCL1_HUMAN	Filtered	1291.42	1785.27			libDIA-6xlib	P35250	P35250	RFC2	Replication factor C subunit 2	P35250	RFC2_HUMAN	Filtered	Filtered	Filtered			dirDIA	Q08211	Q08211	DHX9	ATP-dependent RNA helicase A	Q08211	DHX9_HUMAN	1114.28	1800.04	2260.06
libDIA-22xlib	P37802	P37802	TAGLN2	Transgelin-2	P37802	TAGL2_HUMAN	7264.42	10475.9	7713.65			libDIA-6xlib	P35268	P35268	RPL22	60S ribosomal protein L22	P35268	RL22_HUMAN	11498.1	15080.2	16470.7			dirDIA	Q08380	Q08380	LGALS3BP	Galectin-3-binding protein	Q08380	LG3BP_HUMAN	233.433	1030.33	1303.23
libDIA-22xlib	P37837	P37837	TALDO1	Transaldolase	P37837	TALDO_HUMAN	4859.81	4621.73	5557			libDIA-6xlib	P35527	P35527	KRT9	Keratin, type I cytoskeletal 9	P35527	K1C9_HUMAN	57626.4	1.67025e+06	200681			dirDIA	Q08554	Q08554	DSC1	Desmocollin-1	Q08554	DSC1_HUMAN	932.359	4937.34	5406.61
libDIA-22xlib	P38117	P38117	ETFB	Electron transfer flavoprotein subunit beta	P38117	ETFB_HUMAN	2516.93	1761.69	2366.9			libDIA-6xlib	P35579	P35579	MYH9	Myosin-9	P35579	MYH9_HUMAN	22186.1	23733.8	22087.8			dirDIA	Q08J23	Q08J23	NSUN2	tRNA (cytosine(34)-C(5))-methyltransferase	Q08J23	NSUN2_HUMAN	220.111	486.518	1342.98
libDIA-22xlib	P38159	P38159	RBMX	RNA-binding motif protein, X chromosome	P38159	RBMX_HUMAN	1663.24	1304.37	2256.12			libDIA-6xlib	P35606	P35606	COPB2	Coatomer subunit beta'	P35606	COPB2_HUMAN	1323	2226.62	1775.28			dirDIA	Q09028	Q09028	RBBP4	Histone-binding protein RBBP4	Q09028	RBBP4_HUMAN	1248.84	1853.54	2592.85
libDIA-22xlib	P38606	P38606	ATP6V1A	V-type proton ATPase catalytic subunit A	P38606	VATA_HUMAN	Filtered	Filtered	Filtered			libDIA-6xlib	P35613	P35613	BSG	Basigin	P35613	BASI_HUMAN	3233.45	2560	2682.46			dirDIA	Q09666	Q09666	AHNAK	Neuroblast differentiation-associated protein AHNAK	Q09666	AHNK_HUMAN	10641.8	15916.4	10271
libDIA-22xlib	P38646	P38646	HSPA9	Stress-70 protein, mitochondrial	P38646	GRP75_HUMAN	2321.5	3664.75	3460.3			libDIA-6xlib	P35637	P35637	FUS	RNA-binding protein FUS	P35637	FUS_HUMAN	17891.6	21012.4	18518.2			dirDIA	Q12904	Q12904	AIMP1	Aminoacyl tRNA synthase complex-interacting multifunctional protein 1	Q12904	AIMP1_HUMAN	667.873	1950.89	1521.18
libDIA-22xlib	P38919	P38919	EIF4A3	Eukaryotic initiation factor 4A-III	P38919	IF4A3_HUMAN	1970.52	1787.58	5342.94			libDIA-6xlib	P35658	P35658	NUP214	Nuclear pore complex protein Nup214	P35658	NU214_HUMAN	Filtered	Filtered	Filtered			dirDIA	Q12905	Q12905	ILF2	Interleukin enhancer-binding factor 2	Q12905	ILF2_HUMAN	2015.95	Filtered	2118.7
libDIA-22xlib	P39019	P39019	RPS19	40S ribosomal protein S19	P39019	RS19_HUMAN	7004	10805.1	8191.42			libDIA-6xlib	P35659	P35659	DEK	Protein DEK	P35659	DEK_HUMAN	Filtered	Filtered	937.549			dirDIA	Q12906	Q12906	ILF3	Interleukin enhancer-binding factor 3	Q12906	ILF3_HUMAN	621.402	985.092	1309.34
libDIA-22xlib	P39023	P39023	RPL3	60S ribosomal protein L3	P39023	RL3_HUMAN	8921.16	5074.93	4975.13			libDIA-6xlib	P35754	P35754	GLRX	Glutaredoxin-1	P35754	GLRX1_HUMAN	Filtered	211.853	179.108			dirDIA	Q12931	Q12931	TRAP1	Heat shock protein 75 kDa, mitochondrial	Q12931	TRAP1_HUMAN	0.475525	546.377	1155.28
libDIA-22xlib	P39656	P39656	DDOST	Dolichyl-diphosphooligosaccharide--protein glycosyltransferase 48 kDa subunit	P39656	OST48_HUMAN	3326.3	1775	1826.71			libDIA-6xlib	P35813	P35813	PPM1A	Protein phosphatase 1A	P35813	PPM1A_HUMAN	Filtered	120.416	Filtered			dirDIA	Q13045	Q13045	FLII	Protein flightless-1 homolog	Q13045	FLII_HUMAN	769.44	Filtered	1839.94
libDIA-22xlib	P39687	P39687	ANP32A	Acidic leucine-rich nuclear phosphoprotein 32 family member A	P39687	AN32A_HUMAN	4692.96	3600.84	6871.1			libDIA-6xlib	P35908	P35908	KRT2	Keratin, type II cytoskeletal 2 epidermal	P35908	K22E_HUMAN	205385	531246	895797			dirDIA	Q13177	Q13177	PAK2	Serine/threonine-protein kinase PAK 2	Q13177	PAK2_HUMAN	636.749	971.23	1179.03
libDIA-22xlib	P39748	P39748	FEN1	Flap endonuclease 1	P39748	FEN1_HUMAN	5436.56	7219.4	4755.83			libDIA-6xlib	P35998	P35998	PSMC2	26S protease regulatory subunit 7	P35998	PRS7_HUMAN	Filtered	734.093	2080.08			dirDIA	Q13185	Q13185	CBX3	Chromobox protein homolog 3	Q13185	CBX3_HUMAN	3582.26	5902.02	6625.08
libDIA-22xlib	P40121	P40121	CAPG	Macrophage-capping protein	P40121	CAPG_HUMAN	882.245	915.893	2008.21			libDIA-6xlib	P36507	P36507	MAP2K2	Dual specificity mitogen-activated protein kinase kinase 2	P36507	MP2K2_HUMAN	Filtered	Filtered	Filtered			dirDIA	Q13200	Q13200	PSMD2	26S proteasome non-ATPase regulatory subunit 2	Q13200	PSMD2_HUMAN	286.695	2721.16	3030.42
libDIA-22xlib	P40227	P40227	CCT6A	T-complex protein 1 subunit zeta	P40227	TCPZ_HUMAN	5952.11	7410.08	6956.3			libDIA-6xlib	P36542	P36542	ATP5C1	ATP synthase subunit gamma, mitochondrial	P36542	ATPG_HUMAN	732.117	1341.12	192.658			dirDIA	Q13242	Q13242	SRSF9	Serine/arginine-rich splicing factor 9	Q13242	SRSF9_HUMAN	723.341	3533.88	4255.16
libDIA-22xlib	P40429	P40429	RPL13A	60S ribosomal protein L13a	P40429	RL13A_HUMAN	8811.06	13134.9	21642			libDIA-6xlib	P36551	P36551	CPOX	Oxygen-dependent coproporphyrinogen-III oxidase, mitochondrial	P36551	HEM6_HUMAN	Filtered	Filtered	Filtered			dirDIA	Q13247	Q13247	SRSF6	Serine/arginine-rich splicing factor 6	Q13247	SRSF6_HUMAN	14031.5	14007.1	14203.5
libDIA-22xlib	P40616	P40616	ARL1	ADP-ribosylation factor-like protein 1	P40616	ARL1_HUMAN	Filtered	Filtered	Filtered			libDIA-6xlib	P36578	P36578	RPL4	60S ribosomal protein L4	P36578	RL4_HUMAN	4666.8	3917.66	5312.18			dirDIA	Q13283	Q13283	G3BP1	Ras GTPase-activating protein-binding protein 1	Q13283	G3BP1_HUMAN	Filtered	Filtered	Filtered
libDIA-22xlib	P40925	P40925	MDH1	Malate dehydrogenase, cytoplasmic	P40925	MDHC_HUMAN	5686.34	4875.58	5144.57			libDIA-6xlib	P36871	P36871	PGM1	Phosphoglucomutase-1	P36871	PGM1_HUMAN	2381.17	802.469	593.062			dirDIA	Q13310	Q13310	PABPC4	Polyadenylate-binding protein 4	Q13310	PABP4_HUMAN	210.278	1501.79	1689.93
libDIA-22xlib	P40926	P40926	MDH2	Malate dehydrogenase, mitochondrial	P40926	MDHM_HUMAN	5698.64	5952.76	7365.38			libDIA-6xlib	P36873	P36873	PPP1CC	Serine/threonine-protein phosphatase PP1-gamma catalytic subunit	P36873	PP1G_HUMAN	Filtered	Filtered	Filtered			dirDIA	Q13404	Q13404	UBE2V1	Ubiquitin-conjugating enzyme E2 variant 1	Q13404	UB2V1_HUMAN	6015.29	6121.36	6157.5
libDIA-22xlib	P40939	P40939	HADHA	Trifunctional enzyme subunit alpha, mitochondrial	P40939	ECHA_HUMAN	Filtered	Filtered	Filtered			libDIA-6xlib	P36952	P36952	SERPINB5	Serpin B5	P36952	SPB5_HUMAN	766.554	811.755	1279.03			dirDIA	Q13409	Q13409	DYNC1I2	Cytoplasmic dynein 1 intermediate chain 2	Q13409	DC1I2_HUMAN	3430.79	4811.78	3974.52
libDIA-22xlib	P41091	P41091	EIF2S3	Eukaryotic translation initiation factor 2 subunit 3	P41091	IF2G_HUMAN	1077.38	2098.65	924.356			libDIA-6xlib	P36957	P36957	DLST	Dihydrolipoyllysine-residue succinyltransferase component of 2-oxoglutarate dehydrogenase complex, mitochondrial	P36957	ODO2_HUMAN	2721.62	3642.66	4013.73			dirDIA	Q13428	Q13428	TCOF1	Treacle protein	Q13428	TCOF_HUMAN	Filtered	1146.19	Filtered
libDIA-22xlib	P41250	P41250	GARS	Glycine--tRNA ligase	P41250	SYG_HUMAN	1001.68	2083.6	1325.11			libDIA-6xlib	P37108	P37108	SRP14	Signal recognition particle 14 kDa protein	P37108	SRP14_HUMAN	Filtered	0.455589	Filtered			dirDIA	Q13435	Q13435	SF3B2	Splicing factor 3B subunit 2	Q13435	SF3B2_HUMAN	1151.66	1206.21	1046.69
libDIA-22xlib	P41252	P41252	IARS	Isoleucine--tRNA ligase, cytoplasmic	P41252	SYIC_HUMAN	1226.23	2215.51	1950.29			libDIA-6xlib	P37198	P37198	NUP62	Nuclear pore glycoprotein p62	P37198	NUP62_HUMAN	Filtered	Filtered	Filtered			dirDIA	Q13442	Q13442	PDAP1	28 kDa heat- and acid-stable phosphoprotein	Q13442	HAP28_HUMAN	1978.48	3620.75	4173.17
libDIA-22xlib	P42126	P42126	ECI1	Enoyl-CoA delta isomerase 1, mitochondrial	P42126	ECI1_HUMAN	Filtered	Filtered	1970.5			libDIA-6xlib	P37235	P37235	HPCAL1	Hippocalcin-like protein 1	P37235	HPCL1_HUMAN	208.569	1291.41	1753.8			dirDIA	Q13509	Q13509	TUBB3	Tubulin beta-3 chain	Q13509	TBB3_HUMAN	1418.82	2132.06	2050.03
libDIA-22xlib	P42166	P42166	TMPO	Lamina-associated polypeptide 2, isoform alpha	P42166	LAP2A_HUMAN	Filtered	Filtered	Filtered			libDIA-6xlib	P37802	P37802	TAGLN2	Transgelin-2	P37802	TAGL2_HUMAN	7301.01	11761.2	9062.28			dirDIA	Q13573	Q13573	SNW1	SNW domain-containing protein 1	Q13573	SNW1_HUMAN	0.939629	1132.77	Filtered
libDIA-22xlib	P42167	P42167	TMPO	Lamina-associated polypeptide 2, isoforms beta/gamma	P42167	LAP2B_HUMAN	195.629	218.2	0.784275			libDIA-6xlib	P37837	P37837	TALDO1	Transaldolase	P37837	TALDO_HUMAN	4374.5	5545.83	5556.51			dirDIA	Q13620	Q13620	CUL4B	Cullin-4B	Q13620	CUL4B_HUMAN	Filtered	Filtered	Filtered
libDIA-22xlib	P42285	P42285	SKIV2L2	Superkiller viralicidic activity 2-like 2	P42285	SK2L2_HUMAN	Filtered	Filtered	Filtered			libDIA-6xlib	P38117	P38117	ETFB	Electron transfer flavoprotein subunit beta	P38117	ETFB_HUMAN	1519.6	2831.01	2447.69			dirDIA	Q13813	Q13813	SPTAN1	Spectrin alpha chain, non-erythrocytic 1	Q13813	SPTN1_HUMAN	4048.66	3665.37	3835.08
libDIA-22xlib	P42330	P42330	AKR1C3	Aldo-keto reductase family 1 member C3	P42330	AK1C3_HUMAN	Filtered	Filtered	Filtered			libDIA-6xlib	P38159	P38159	RBMX	RNA-binding motif protein, X chromosome	P38159	RBMX_HUMAN	1916.52	2899.98	2256.11			dirDIA	Q13835	Q13835	PKP1	Plakophilin-1	Q13835	PKP1_HUMAN	Filtered	1017.69	Filtered
libDIA-22xlib	P42357	P42357	HAL	Histidine ammonia-lyase	P42357	HUTH_HUMAN	Filtered	Filtered	376.189			libDIA-6xlib	P38606	P38606	ATP6V1A	V-type proton ATPase catalytic subunit A	P38606	VATA_HUMAN	Filtered	836.917	Filtered			dirDIA	Q13838	Q13838	DDX39B	Spliceosome RNA helicase DDX39B	Q13838	DX39B_HUMAN	9274.86	11134.6	10911.2
libDIA-22xlib	P42677	P42677	RPS27	40S ribosomal protein S27	P42677	RS27_HUMAN	1295.44	1717.59	2417.29			libDIA-6xlib	P38646	P38646	HSPA9	Stress-70 protein, mitochondrial	P38646	GRP75_HUMAN	2920.26	4549.33	5143.11			dirDIA	Q14019	Q14019	COTL1	Coactosin-like protein	Q14019	COTL1_HUMAN	11693.5	11640.3	9951.76
libDIA-22xlib	P42704	P42704	LRPPRC	Leucine-rich PPR motif-containing protein, mitochondrial	P42704	LPPRC_HUMAN	307.325	295.129	71.3719			libDIA-6xlib	P38919	P38919	EIF4A3	Eukaryotic initiation factor 4A-III	P38919	IF4A3_HUMAN	1938.53	1013.71	1889.26			dirDIA	Q14103	Q14103	HNRNPD	Heterogeneous nuclear ribonucleoprotein D0	Q14103	HNRPD_HUMAN	7265.24	12662.5	12892.5
libDIA-22xlib	P42765	P42765	ACAA2	3-ketoacyl-CoA thiolase, mitochondrial	P42765	THIM_HUMAN	729.406	Filtered	Filtered			libDIA-6xlib	P39019	P39019	RPS19	40S ribosomal protein S19	P39019	RS19_HUMAN	6999.41	10805.1	8192.46			dirDIA	Q14165	Q14165	MLEC	Malectin	Q14165	MLEC_HUMAN	Filtered	Filtered	Filtered
libDIA-22xlib	P42766	P42766	RPL35	60S ribosomal protein L35	P42766	RL35_HUMAN	11901	13796	16425.2			libDIA-6xlib	P39023	P39023	RPL3	60S ribosomal protein L3	P39023	RL3_HUMAN	4040.29	5242.07	5330.95			dirDIA	Q14166	Q14166	TTLL12	Tubulin--tyrosine ligase-like protein 12	Q14166	TTL12_HUMAN	959.634	2950.71	1051.93
libDIA-22xlib	P43034	P43034	PAFAH1B1	Platelet-activating factor acetylhydrolase IB subunit alpha	P43034	LIS1_HUMAN	1703.81	1504.44	1407.03			libDIA-6xlib	P39656	P39656	DDOST	Dolichyl-diphosphooligosaccharide--protein glycosyltransferase 48 kDa subunit	P39656	OST48_HUMAN	3326.33	1873.18	2053.76			dirDIA	Q14204	Q14204	DYNC1H1	Cytoplasmic dynein 1 heavy chain 1	Q14204	DYHC1_HUMAN	5403.68	7702.04	9426.6
libDIA-22xlib	P43243	P43243	MATR3	Matrin-3	P43243	MATR3_HUMAN	978.547	1823.27	1600.44			libDIA-6xlib	P39687	P39687	ANP32A	Acidic leucine-rich nuclear phosphoprotein 32 family member A	P39687	AN32A_HUMAN	4525.98	3356.64	6650.23			dirDIA	Q14247	Q14247	CTTN	Src substrate cortactin	Q14247	SRC8_HUMAN	1401.53	1959.25	2372.51
libDIA-22xlib	P43246	P43246	MSH2	DNA mismatch repair protein Msh2	P43246	MSH2_HUMAN	Filtered	349.764	Filtered			libDIA-6xlib	P39748	P39748	FEN1	Flap endonuclease 1	P39748	FEN1_HUMAN	7334.55	9606.86	6450.07			dirDIA	Q14258	Q14258	TRIM25	E3 ubiquitin/ISG15 ligase TRIM25	Q14258	TRI25_HUMAN	605.615	956.658	2110.24
libDIA-22xlib	P43307	P43307	SSR1	Translocon-associated protein subunit alpha	P43307	SSRA_HUMAN	Filtered	731.301	1352.51			libDIA-6xlib	P40121	P40121	CAPG	Macrophage-capping protein	P40121	CAPG_HUMAN	1161.77	958.155	2386.13			dirDIA	Q14315	Q14315	FLNC	Filamin-C	Q14315	FLNC_HUMAN	3805.54	5047.64	7502.23
libDIA-22xlib	P43356;P43360	P43356;P43360	MAGEA2;MAGEA6	Melanoma-associated antigen 2;Melanoma-associated antigen 6	P43356;P43360	MAGA2_HUMAN;MAGA6_HUMAN	Filtered	Filtered	Filtered			libDIA-6xlib	P40222	P40222	TXLNA	Alpha-taxilin	P40222	TXLNA_HUMAN	Filtered	Filtered	Filtered			dirDIA	Q14444	Q14444	CAPRIN1	Caprin-1	Q14444	CAPR1_HUMAN	147.729	409.94	843.364
libDIA-22xlib	P43487	P43487	RANBP1	Ran-specific GTPase-activating protein	P43487	RANG_HUMAN	978.925	2744.33	2130.87			libDIA-6xlib	P40227	P40227	CCT6A	T-complex protein 1 subunit zeta	P40227	TCPZ_HUMAN	5435.65	6852.95	6327.11			dirDIA	Q14677	Q14677	CLINT1	Clathrin interactor 1	Q14677	EPN4_HUMAN	Filtered	1358.78	Filtered
libDIA-22xlib	P43490	P43490	NAMPT	Nicotinamide phosphoribosyltransferase	P43490	NAMPT_HUMAN	2049.49	3321.71	2217.45			libDIA-6xlib	P40429	P40429	RPL13A	60S ribosomal protein L13a	P40429	RL13A_HUMAN	8768.16	12892.2	18400.6			dirDIA	Q14697	Q14697	GANAB	Neutral alpha-glucosidase AB	Q14697	GANAB_HUMAN	6584.04	6564.38	8756.63
libDIA-22xlib	P43686	P43686	PSMC4	26S protease regulatory subunit 6B	P43686	PRS6B_HUMAN	2015.99	4378.15	2537.5			libDIA-6xlib	P40616	P40616	ARL1	ADP-ribosylation factor-like protein 1	P40616	ARL1_HUMAN	Filtered	Filtered	Filtered			dirDIA	Q14764	Q14764	MVP	Major vault protein	Q14764	MVP_HUMAN	599.81	614.51	518.322
libDIA-22xlib	P45880	P45880	VDAC2	Voltage-dependent anion-selective channel protein 2	P45880	VDAC2_HUMAN	3685.47	3325.29	3820.59			libDIA-6xlib	P40925	P40925	MDH1	Malate dehydrogenase, cytoplasmic	P40925	MDHC_HUMAN	5504.33	5030.99	5190.82			dirDIA	Q14847	Q14847	LASP1	LIM and SH3 domain protein 1	Q14847	LASP1_HUMAN	12022.9	17547.6	22284.2
libDIA-22xlib	P45973	P45973	CBX5	Chromobox protein homolog 5	P45973	CBX5_HUMAN	0.783371	786.832	876.667			libDIA-6xlib	P40926	P40926	MDH2	Malate dehydrogenase, mitochondrial	P40926	MDHM_HUMAN	5698.67	5952.59	7242.37			dirDIA	Q14914	Q14914	PTGR1	Prostaglandin reductase 1	Q14914	PTGR1_HUMAN	3930.77	3430.06	4683.49
libDIA-22xlib	P45974	P45974	USP5	Ubiquitin carboxyl-terminal hydrolase 5	P45974	UBP5_HUMAN	1187.05	979.852	1835.44			libDIA-6xlib	P40937	P40937	RFC5	Replication factor C subunit 5	P40937	RFC5_HUMAN	Filtered	Filtered	Filtered			dirDIA	Q15008	Q15008	PSMD6	26S proteasome non-ATPase regulatory subunit 6	Q15008	PSMD6_HUMAN	1041.31	1699.01	2178.24
libDIA-22xlib	P46013	P46013	MKI67	Antigen KI-67	P46013	KI67_HUMAN	Filtered	Filtered	54410.6			libDIA-6xlib	P40939	P40939	HADHA	Trifunctional enzyme subunit alpha, mitochondrial	P40939	ECHA_HUMAN	Filtered	Filtered	Filtered			dirDIA	Q15056	Q15056	EIF4H	Eukaryotic translation initiation factor 4H	Q15056	IF4H_HUMAN	1905.9	7445.6	6396.85
libDIA-22xlib	P46060	P46060	RANGAP1	Ran GTPase-activating protein 1	P46060	RAGP1_HUMAN	1977.02	1312.55	3027.61			libDIA-6xlib	P41091	P41091	EIF2S3	Eukaryotic translation initiation factor 2 subunit 3	P41091	IF2G_HUMAN	919.336	1290.14	1626.81			dirDIA	Q15084	Q15084	PDIA6	Protein disulfide-isomerase A6	Q15084	PDIA6_HUMAN	859.03	2510.93	2729.74
libDIA-22xlib	P46087	P46087	NOP2	Probable 28S rRNA (cytosine(4447)-C(5))-methyltransferase	P46087	NOP2_HUMAN	Filtered	Filtered	Filtered			libDIA-6xlib	P41250	P41250	GARS	Glycine--tRNA ligase	P41250	SYG_HUMAN	1432.71	2634.86	1800.97			dirDIA	Q15149	Q15149	PLEC	Plectin	Q15149	PLEC_HUMAN	4198.78	8295.1	8556.96
libDIA-22xlib	P46379	P46379	BAG6	Large proline-rich protein BAG6	P46379	BAG6_HUMAN	Filtered	Filtered	Filtered			libDIA-6xlib	P41252	P41252	IARS	Isoleucine--tRNA ligase, cytoplasmic	P41252	SYIC_HUMAN	1226.25	1475.73	1632.37			dirDIA	Q15181	Q15181	PPA1	Inorganic pyrophosphatase	Q15181	IPYR_HUMAN	2783.89	4865.46	4242.71
libDIA-22xlib	P46734	P46734	MAP2K3	Dual specificity mitogen-activated protein kinase kinase 3	P46734	MP2K3_HUMAN	Filtered	Filtered	Filtered			libDIA-6xlib	P41743	P41743	PRKCI	Protein kinase C iota type	P41743	KPCI_HUMAN	Filtered	Filtered	Filtered			dirDIA	Q15185	Q15185	PTGES3	Prostaglandin E synthase 3	Q15185	TEBP_HUMAN	8552.36	10445.9	11770.3
libDIA-22xlib	P46776	P46776	RPL27A	60S ribosomal protein L27a	P46776	RL27A_HUMAN	13590.3	15500.6	12766.8			libDIA-6xlib	P42126	P42126	ECI1	Enoyl-CoA delta isomerase 1, mitochondrial	P42126	ECI1_HUMAN	Filtered	Filtered	307.753			dirDIA	Q15293	Q15293	RCN1	Reticulocalbin-1	Q15293	RCN1_HUMAN	1140.75	3323.48	2775.46
libDIA-22xlib	P46777	P46777	RPL5	60S ribosomal protein L5	P46777	RL5_HUMAN	1840.13	2955.93	3216.92			libDIA-6xlib	P42166	P42166	TMPO	Lamina-associated polypeptide 2, isoform alpha	P42166	LAP2A_HUMAN	Filtered	1288.96	Filtered			dirDIA	Q15323	Q15323	KRT31	Keratin, type I cuticular Ha1	Q15323	K1H1_HUMAN	18283.2	2788.29	Filtered
libDIA-22xlib	P46778	P46778	RPL21	60S ribosomal protein L21	P46778	RL21_HUMAN	Filtered	Filtered	Filtered			libDIA-6xlib	P42167	P42167	TMPO	Lamina-associated polypeptide 2, isoforms beta/gamma	P42167	LAP2B_HUMAN	Filtered	Filtered	Filtered			dirDIA	Q15365	Q15365	PCBP1	Poly(rC)-binding protein 1	Q15365	PCBP1_HUMAN	1651.34	2860.62	3708.4
libDIA-22xlib	P46781	P46781	RPS9	40S ribosomal protein S9	P46781	RS9_HUMAN	14189.4	19173.1	25489.3			libDIA-6xlib	P42224	P42224	STAT1	Signal transducer and activator of transcription 1-alpha/beta	P42224	STAT1_HUMAN	Filtered	Filtered	Filtered			dirDIA	Q15366	Q15366	PCBP2	Poly(rC)-binding protein 2	Q15366	PCBP2_HUMAN	0.604889	Filtered	0.624115
libDIA-22xlib	P46782	P46782	RPS5	40S ribosomal protein S5	P46782	RS5_HUMAN	7467.26	6567.98	7118.5			libDIA-6xlib	P42285	P42285	SKIV2L2	Superkiller viralicidic activity 2-like 2	P42285	SK2L2_HUMAN	Filtered	Filtered	Filtered			dirDIA	Q15393	Q15393	SF3B3	Splicing factor 3B subunit 3	Q15393	SF3B3_HUMAN	504.437	2567.15	2546.01
libDIA-22xlib	P46783	P46783	RPS10	40S ribosomal protein S10	P46783	RS10_HUMAN	3954.71	4767.4	3130.4			libDIA-6xlib	P42574	P42574	CASP3	Caspase-3	P42574	CASP3_HUMAN	Filtered	Filtered	Filtered			dirDIA	Q15417;Q99439	Q15417;Q99439	CNN3;CNN2	Calponin-3;Calponin-2	Q15417;Q99439	CNN3_HUMAN;CNN2_HUMAN	2136.57	3539.06	3841.83
libDIA-22xlib	P46821	P46821	MAP1B	Microtubule-associated protein 1B	P46821	MAP1B_HUMAN	876.246	2629.15	2646.03			libDIA-6xlib	P42677	P42677	RPS27	40S ribosomal protein S27	P42677	RS27_HUMAN	1217.27	2048.64	2619.51			dirDIA	Q15427	Q15427	SF3B4	Splicing factor 3B subunit 4	Q15427	SF3B4_HUMAN	Filtered	Filtered	Filtered
libDIA-22xlib	P46926	P46926	GNPDA1	Glucosamine-6-phosphate isomerase 1	P46926	GNPI1_HUMAN	Filtered	Filtered	Filtered			libDIA-6xlib	P42704	P42704	LRPPRC	Leucine-rich PPR motif-containing protein, mitochondrial	P42704	LPPRC_HUMAN	399.616	226.08	226.082			dirDIA	Q15435	Q15435	PPP1R7	Protein phosphatase 1 regulatory subunit 7	Q15435	PP1R7_HUMAN	Filtered	Filtered	Filtered
libDIA-22xlib	P46940	P46940	IQGAP1	Ras GTPase-activating-like protein IQGAP1	P46940	IQGA1_HUMAN	1028.16	1815.87	1691.05			libDIA-6xlib	P42765	P42765	ACAA2	3-ketoacyl-CoA thiolase, mitochondrial	P42765	THIM_HUMAN	Filtered	Filtered	Filtered			dirDIA	Q15631	Q15631	TSN	Translin	Q15631	TSN_HUMAN	Filtered	818.87	Filtered
libDIA-22xlib	P46977	P46977	STT3A	Dolichyl-diphosphooligosaccharide--protein glycosyltransferase subunit STT3A	P46977	STT3A_HUMAN	Filtered	Filtered	Filtered			libDIA-6xlib	P42766	P42766	RPL35	60S ribosomal protein L35	P42766	RL35_HUMAN	4687.64	7658.83	11359.8			dirDIA	Q15637	Q15637	SF1	Splicing factor 1	Q15637	SF01_HUMAN	Filtered	Filtered	Filtered
libDIA-22xlib	P47755	P47755	CAPZA2	F-actin-capping protein subunit alpha-2	P47755	CAZA2_HUMAN	Filtered	Filtered	Filtered			libDIA-6xlib	P42771	P42771	CDKN2A	Cyclin-dependent kinase inhibitor 2A	P42771	CDN2A_HUMAN	Filtered	Filtered	Filtered			dirDIA	Q15645	Q15645	TRIP13	Pachytene checkpoint protein 2 homolog	Q15645	PCH2_HUMAN	962.315	1844.61	3565.6
libDIA-22xlib	P47756	P47756	CAPZB	F-actin-capping protein subunit beta	P47756	CAPZB_HUMAN	1536.66	1592.36	2333.91			libDIA-6xlib	P43034	P43034	PAFAH1B1	Platelet-activating factor acetylhydrolase IB subunit alpha	P43034	LIS1_HUMAN	1703.97	1124.68	1394.32			dirDIA	Q15691	Q15691	MAPRE1	Microtubule-associated protein RP/EB family member 1	Q15691	MARE1_HUMAN	1870.44	3528.82	5890.86
libDIA-22xlib	P47895	P47895	ALDH1A3	Aldehyde dehydrogenase family 1 member A3	P47895	AL1A3_HUMAN	2132.65	2843.26	4377.45			libDIA-6xlib	P43121	P43121	MCAM	Cell surface glycoprotein MUC18	P43121	MUC18_HUMAN	Filtered	Filtered	Filtered			dirDIA	Q15717	Q15717	ELAVL1	ELAV-like protein 1	Q15717	ELAV1_HUMAN	1452.37	2244.52	2381.89
libDIA-22xlib	P47897	P47897	QARS	Glutamine--tRNA ligase	P47897	SYQ_HUMAN	Filtered	299.579	Filtered			libDIA-6xlib	P43243	P43243	MATR3	Matrin-3	P43243	MATR3_HUMAN	830.232	2127.19	1291.01			dirDIA	Q15843	Q15843	NEDD8	NEDD8	Q15843	NEDD8_HUMAN	2032.68	11657.3	20165.4
libDIA-22xlib	P47914	P47914	RPL29	60S ribosomal protein L29	P47914	RL29_HUMAN	2378.61	Filtered	4063.28			libDIA-6xlib	P43246	P43246	MSH2	DNA mismatch repair protein Msh2	P43246	MSH2_HUMAN	Filtered	Filtered	Filtered			dirDIA	Q16181	Q16181	2020-09-07	Septin-7	Q16181	SEPT7_HUMAN	Filtered	1264.93	927.29
libDIA-22xlib	P47985	P47985	UQCRFS1	Cytochrome b-c1 complex subunit Rieske, mitochondrial	P47985	UCRI_HUMAN	3994.22	2539.17	Filtered			libDIA-6xlib	P43307	P43307	SSR1	Translocon-associated protein subunit alpha	P43307	SSRA_HUMAN	197.401	972.352	1352.5			dirDIA	Q16531	Q16531	DDB1	DNA damage-binding protein 1	Q16531	DDB1_HUMAN	922.156	2616.73	2847.16
libDIA-22xlib	P48047	P48047	ATP5O	ATP synthase subunit O, mitochondrial	P48047	ATPO_HUMAN	163.124	Filtered	Filtered			libDIA-6xlib	P43487	P43487	RANBP1	Ran-specific GTPase-activating protein	P43487	RANG_HUMAN	981.013	2744.43	3659.53			dirDIA	Q16543	Q16543	CDC37	Hsp90 co-chaperone Cdc37	Q16543	CDC37_HUMAN	0.628063	Filtered	946.808
libDIA-22xlib	P48147	P48147	PREP	Prolyl endopeptidase	P48147	PPCE_HUMAN	Filtered	Filtered	Filtered			libDIA-6xlib	P43490	P43490	NAMPT	Nicotinamide phosphoribosyltransferase	P43490	NAMPT_HUMAN	2506.56	3518.53	3884.44			dirDIA	Q16563	Q16563	SYPL1	Synaptophysin-like protein 1	Q16563	SYPL1_HUMAN	Filtered	1298.39	1685.13
libDIA-22xlib	P48163	P48163	ME1	NADP-dependent malic enzyme	P48163	MAOX_HUMAN	Filtered	Filtered	Filtered			libDIA-6xlib	P43686	P43686	PSMC4	26S protease regulatory subunit 6B	P43686	PRS6B_HUMAN	Filtered	3313.04	2829.29			dirDIA	Q16629	Q16629	SRSF7	Serine/arginine-rich splicing factor 7	Q16629	SRSF7_HUMAN	2838.28	3741.4	4241.44
libDIA-22xlib	P48444	P48444	ARCN1	Coatomer subunit delta	P48444	COPD_HUMAN	Filtered	Filtered	Filtered			libDIA-6xlib	P45880	P45880	VDAC2	Voltage-dependent anion-selective channel protein 2	P45880	VDAC2_HUMAN	3729.05	3325.32	2430.48			dirDIA	Q16630	Q16630	CPSF6	Cleavage and polyadenylation specificity factor subunit 6	Q16630	CPSF6_HUMAN	Filtered	Filtered	Filtered
libDIA-22xlib	P48506	P48506	GCLC	Glutamate--cysteine ligase catalytic subunit	P48506	GSH1_HUMAN	Filtered	Filtered	Filtered			libDIA-6xlib	P45973	P45973	CBX5	Chromobox protein homolog 5	P45973	CBX5_HUMAN	Filtered	Filtered	Filtered			dirDIA	Q16643	Q16643	DBN1	Drebrin	Q16643	DREB_HUMAN	Filtered	147.969	Filtered
libDIA-22xlib	P48507	P48507	GCLM	Glutamate--cysteine ligase regulatory subunit	P48507	GSH0_HUMAN	4161.71	5215.89	5411.02			libDIA-6xlib	P45974	P45974	USP5	Ubiquitin carboxyl-terminal hydrolase 5	P45974	UBP5_HUMAN	1289.57	1938.92	1664.88			dirDIA	Q16658	Q16658	FSCN1	Fascin	Q16658	FSCN1_HUMAN	6005.85	4744.36	6574.58
libDIA-22xlib	P48556	P48556	PSMD8	26S proteasome non-ATPase regulatory subunit 8	P48556	PSMD8_HUMAN	1994.77	3414.35	3099.47			libDIA-6xlib	P46060	P46060	RANGAP1	Ran GTPase-activating protein 1	P46060	RAGP1_HUMAN	1976.6	2389.67	2330.17			dirDIA	Q16719	Q16719	KYNU	Kynureninase	Q16719	KYNU_HUMAN	Filtered	Filtered	701.691
libDIA-22xlib	P48637	P48637	GSS	Glutathione synthetase	P48637	GSHB_HUMAN	2535.76	Filtered	1822.52			libDIA-6xlib	P46087	P46087	NOP2	Probable 28S rRNA (cytosine(4447)-C(5))-methyltransferase	P46087	NOP2_HUMAN	Filtered	526.708	Filtered			dirDIA	Q16851	Q16851	UGP2	UTP--glucose-1-phosphate uridylyltransferase	Q16851	UGPA_HUMAN	750.505	1199.38	1137.85
libDIA-22xlib	P48643	P48643	CCT5	T-complex protein 1 subunit epsilon	P48643	TCPE_HUMAN	3912.53	5400.29	7675.18			libDIA-6xlib	P46109	P46109	CRKL	Crk-like protein	P46109	CRKL_HUMAN	Filtered	Filtered	Filtered			dirDIA	Q16881	Q16881	TXNRD1	Thioredoxin reductase 1, cytoplasmic	Q16881	TRXR1_HUMAN	5567.04	6563.15	8847.36
libDIA-22xlib	P48735	P48735	IDH2	Isocitrate dehydrogenase [NADP], mitochondrial	P48735	IDHP_HUMAN	Filtered	Filtered	Filtered			libDIA-6xlib	P46379	P46379	BAG6	Large proline-rich protein BAG6	P46379	BAG6_HUMAN	Filtered	Filtered	Filtered			dirDIA	Q16891	Q16891	IMMT	MICOS complex subunit MIC60	Q16891	MIC60_HUMAN	Filtered	Filtered	Filtered
libDIA-22xlib	P48739	P48739	PITPNB	Phosphatidylinositol transfer protein beta isoform	P48739	PIPNB_HUMAN	Filtered	Filtered	Filtered			libDIA-6xlib	P46459	P46459	NSF	Vesicle-fusing ATPase	P46459	NSF_HUMAN	Filtered	Filtered	Filtered			dirDIA	Q3SY84;Q7RTS7;Q86Y46	Q3SY84;Q7RTS7;Q86Y46	KRT71;KRT74;KRT73	Keratin, type II cytoskeletal 71;Keratin, type II cytoskeletal 74;Keratin, type II cytoskeletal 73	Q3SY84;Q7RTS7;Q86Y46	K2C71_HUMAN;K2C74_HUMAN;K2C73_HUMAN	2016.14	17850	6019.37
libDIA-22xlib	P49189	P49189	ALDH9A1	4-trimethylaminobutyraldehyde dehydrogenase	P49189	AL9A1_HUMAN	Filtered	3099.38	2324.69			libDIA-6xlib	P46734	P46734	MAP2K3	Dual specificity mitogen-activated protein kinase kinase 3	P46734	MP2K3_HUMAN	Filtered	Filtered	Filtered			dirDIA	Q53GQ0	Q53GQ0	HSD17B12	Very-long-chain 3-oxoacyl-CoA reductase	Q53GQ0	DHB12_HUMAN	Filtered	Filtered	Filtered
libDIA-22xlib	P49207	P49207	RPL34	60S ribosomal protein L34	P49207	RL34_HUMAN	5633.02	5526.71	4173.5			libDIA-6xlib	P46776	P46776	RPL27A	60S ribosomal protein L27a	P46776	RL27A_HUMAN	13590.3	15500.6	12766.8			dirDIA	Q58FF6	Q58FF6	HSP90AB4P	Putative heat shock protein HSP 90-beta 4	Q58FF6	H90B4_HUMAN	1343.74	4093.34	3265.29
libDIA-22xlib	P49257	P49257	LMAN1	Protein ERGIC-53	P49257	LMAN1_HUMAN	Filtered	1439.23	1313.24			libDIA-6xlib	P46777	P46777	RPL5	60S ribosomal protein L5	P46777	RL5_HUMAN	2163.55	3178.97	1245.82			dirDIA	Q5D862	Q5D862	FLG2	Filaggrin-2	Q5D862	FILA2_HUMAN	2233.92	8986.01	10730.6
libDIA-22xlib	P49321	P49321	NASP	Nuclear autoantigenic sperm protein	P49321	NASP_HUMAN	9332.51	2736.55	2894.89			libDIA-6xlib	P46778	P46778	RPL21	60S ribosomal protein L21	P46778	RL21_HUMAN	Filtered	Filtered	Filtered			dirDIA	Q5T9A4;Q9NVI7	Q5T9A4;Q9NVI7	ATAD3B;ATAD3A	ATPase family AAA domain-containing protein 3B;ATPase family AAA domain-containing protein 3A	Q5T9A4;Q9NVI7	ATD3B_HUMAN;ATD3A_HUMAN	Filtered	Filtered	0.424988
libDIA-22xlib	P49327	P49327	FASN	Fatty acid synthase	P49327	FAS_HUMAN	2563.37	3327.3	4751.69			libDIA-6xlib	P46781	P46781	RPS9	40S ribosomal protein S9	P46781	RS9_HUMAN	12880.9	17088.9	22864.3			dirDIA	Q6DD88	Q6DD88	ATL3	Atlastin-3	Q6DD88	ATLA3_HUMAN	Filtered	Filtered	Filtered
libDIA-22xlib	P49368	P49368	CCT3	T-complex protein 1 subunit gamma	P49368	TCPG_HUMAN	10786.4	4031.94	4736.14			libDIA-6xlib	P46782	P46782	RPS5	40S ribosomal protein S5	P46782	RS5_HUMAN	7558.8	6525.71	7427.6			dirDIA	Q6KB66	Q6KB66	KRT80	Keratin, type II cytoskeletal 80	Q6KB66	K2C80_HUMAN	Filtered	Filtered	Filtered
libDIA-22xlib	P49406	P49406	MRPL19	39S ribosomal protein L19, mitochondrial	P49406	RM19_HUMAN	0.427826	Filtered	Filtered			libDIA-6xlib	P46783	P46783	RPS10	40S ribosomal protein S10	P46783	RS10_HUMAN	3651.05	9317.5	3862.91			dirDIA	Q6NUK1	Q6NUK1	SLC25A24	Calcium-binding mitochondrial carrier protein SCaMC-1	Q6NUK1	SCMC1_HUMAN	Filtered	0.877464	1240.76
libDIA-22xlib	P49411	P49411	TUFM	Elongation factor Tu, mitochondrial	P49411	EFTU_HUMAN	3146.41	3496.27	4380.85			libDIA-6xlib	P46821	P46821	MAP1B	Microtubule-associated protein 1B	P46821	MAP1B_HUMAN	1127.68	1870.66	1819.2			dirDIA	Q6NZI2	Q6NZI2	PTRF	Polymerase I and transcript release factor	Q6NZI2	PTRF_HUMAN	140.918	434.202	654.748
libDIA-22xlib	P49419	P49419	ALDH7A1	Alpha-aminoadipic semialdehyde dehydrogenase	P49419	AL7A1_HUMAN	Filtered	0.647232	Filtered			libDIA-6xlib	P46926	P46926	GNPDA1	Glucosamine-6-phosphate isomerase 1	P46926	GNPI1_HUMAN	Filtered	Filtered	Filtered			dirDIA	Q6P2Q9	Q6P2Q9	PRPF8	Pre-mRNA-processing-splicing factor 8	Q6P2Q9	PRP8_HUMAN	195.631	275.538	779.751
libDIA-22xlib	P49458	P49458	SRP9	Signal recognition particle 9 kDa protein	P49458	SRP09_HUMAN	Filtered	Filtered	Filtered			libDIA-6xlib	P46940	P46940	IQGAP1	Ras GTPase-activating-like protein IQGAP1	P46940	IQGA1_HUMAN	1516.78	2131.41	1601.23			dirDIA	Q6PCB0	Q6PCB0	VWA1	von Willebrand factor A domain-containing protein 1	Q6PCB0	VWA1_HUMAN	24999.1	29979.2	38276.6
libDIA-22xlib	P49585;Q9Y5K3	P49585;Q9Y5K3	PCYT1A;PCYT1B	Choline-phosphate cytidylyltransferase A;Choline-phosphate cytidylyltransferase B	P49585;Q9Y5K3	PCY1A_HUMAN;PCY1B_HUMAN	Filtered	Filtered	1199.56			libDIA-6xlib	P46977	P46977	STT3A	Dolichyl-diphosphooligosaccharide--protein glycosyltransferase subunit STT3A	P46977	STT3A_HUMAN	Filtered	Filtered	Filtered			dirDIA	Q6PIU2	Q6PIU2	NCEH1	Neutral cholesterol ester hydrolase 1	Q6PIU2	NCEH1_HUMAN	Filtered	463.854	1116.21
libDIA-22xlib	P49588	P49588	AARS	Alanine--tRNA ligase, cytoplasmic	P49588	SYAC_HUMAN	Filtered	Filtered	Filtered			libDIA-6xlib	P47755	P47755	CAPZA2	F-actin-capping protein subunit alpha-2	P47755	CAZA2_HUMAN	Filtered	Filtered	Filtered			dirDIA	Q6ZVX7	Q6ZVX7	NCCRP1	F-box only protein 50	Q6ZVX7	FBX50_HUMAN	Filtered	4895.38	2042.33
libDIA-22xlib	P49589	P49589	CARS	Cysteine--tRNA ligase, cytoplasmic	P49589	SYCC_HUMAN	Filtered	Filtered	Filtered			libDIA-6xlib	P47756	P47756	CAPZB	F-actin-capping protein subunit beta	P47756	CAPZB_HUMAN	1461.8	1300.1	1062.88			dirDIA	Q7KZF4	Q7KZF4	SND1	Staphylococcal nuclease domain-containing protein 1	Q7KZF4	SND1_HUMAN	3946.44	3895.52	5059.87
libDIA-22xlib	P49591	P49591	SARS	Serine--tRNA ligase, cytoplasmic	P49591	SYSC_HUMAN	Filtered	Filtered	1.32296			libDIA-6xlib	P47895	P47895	ALDH1A3	Aldehyde dehydrogenase family 1 member A3	P47895	AL1A3_HUMAN	2132.09	2886.81	4377.43			dirDIA	Q7L014	Q7L014	DDX46	Probable ATP-dependent RNA helicase DDX46	Q7L014	DDX46_HUMAN	0.432999	0.432083	0.499477
libDIA-22xlib	P49720	P49720	PSMB3	Proteasome subunit beta type-3	P49720	PSB3_HUMAN	Filtered	Filtered	Filtered			libDIA-6xlib	P47897	P47897	QARS	Glutamine--tRNA ligase	P47897	SYQ_HUMAN	Filtered	Filtered	942.66			dirDIA	Q7L1Q6	Q7L1Q6	BZW1	Basic leucine zipper and W2 domain-containing protein 1	Q7L1Q6	BZW1_HUMAN	3369.14	7572.85	7370.44
libDIA-22xlib	P49721	P49721	PSMB2	Proteasome subunit beta type-2	P49721	PSB2_HUMAN	2321.19	2625.21	Filtered			libDIA-6xlib	P47914	P47914	RPL29	60S ribosomal protein L29	P47914	RL29_HUMAN	2378.62	3212.33	4881.54			dirDIA	Q7RTV0	Q7RTV0	PHF5A	PHD finger-like domain-containing protein 5A	Q7RTV0	PHF5A_HUMAN	1536	1880.75	1252.92
libDIA-22xlib	P49736	P49736	MCM2	DNA replication licensing factor MCM2	P49736	MCM2_HUMAN	1804.92	1558.95	2188.15			libDIA-6xlib	P47985	P47985	UQCRFS1	Cytochrome b-c1 complex subunit Rieske, mitochondrial	P47985	UCRI_HUMAN	Filtered	Filtered	Filtered			dirDIA	Q7Z6Z7	Q7Z6Z7	HUWE1	E3 ubiquitin-protein ligase HUWE1	Q7Z6Z7	HUWE1_HUMAN	Filtered	1402.32	840.195
libDIA-22xlib	P49748	P49748	ACADVL	Very long-chain specific acyl-CoA dehydrogenase, mitochondrial	P49748	ACADV_HUMAN	Filtered	858.236	Filtered			libDIA-6xlib	P48047	P48047	ATP5O	ATP synthase subunit O, mitochondrial	P48047	ATPO_HUMAN	Filtered	0.642288	369.899			dirDIA	Q7Z794	Q7Z794	KRT77	Keratin, type II cytoskeletal 1b	Q7Z794	K2C1B_HUMAN	592.796	3358.53	933.459
libDIA-22xlib	P49755	P49755	TMED10	Transmembrane emp24 domain-containing protein 10	P49755	TMEDA_HUMAN	0.48024	Filtered	Filtered			libDIA-6xlib	P48147	P48147	PREP	Prolyl endopeptidase	P48147	PPCE_HUMAN	Filtered	Filtered	Filtered			dirDIA	Q86V81	Q86V81	ALYREF	THO complex subunit 4	Q86V81	THOC4_HUMAN	1354.49	2088.08	2132.21
libDIA-22xlib	P49756	P49756	RBM25	RNA-binding protein 25	P49756	RBM25_HUMAN	Filtered	Filtered	Filtered			libDIA-6xlib	P48163	P48163	ME1	NADP-dependent malic enzyme	P48163	MAOX_HUMAN	Filtered	Filtered	Filtered			dirDIA	Q86VP6	Q86VP6	CAND1	Cullin-associated NEDD8-dissociated protein 1	Q86VP6	CAND1_HUMAN	2337.61	5462.47	5136.82
libDIA-22xlib	P49773	P49773	HINT1	Histidine triad nucleotide-binding protein 1	P49773	HINT1_HUMAN	7529.68	8978.58	5292.03			libDIA-6xlib	P48357	P48357	LEPR	Leptin receptor	P48357	LEPR_HUMAN	54049.4	24403.8	13377			dirDIA	Q86XP3	Q86XP3	DDX42	ATP-dependent RNA helicase DDX42	Q86XP3	DDX42_HUMAN	Filtered	Filtered	Filtered
libDIA-22xlib	P49915	P49915	GMPS	GMP synthase [glutamine-hydrolyzing]	P49915	GUAA_HUMAN	527.688	3206.02	1953.95			libDIA-6xlib	P48444	P48444	ARCN1	Coatomer subunit delta	P48444	COPD_HUMAN	Filtered	Filtered	Filtered			dirDIA	Q86Y56	Q86Y56	DNAAF5	Dynein assembly factor 5, axonemal	Q86Y56	DAAF5_HUMAN	23215.8	14547.5	3775.58
libDIA-22xlib	P50213	P50213	IDH3A	Isocitrate dehydrogenase [NAD] subunit alpha, mitochondrial	P50213	IDH3A_HUMAN	Filtered	Filtered	Filtered			libDIA-6xlib	P48506	P48506	GCLC	Glutamate--cysteine ligase catalytic subunit	P48506	GSH1_HUMAN	Filtered	Filtered	Filtered			dirDIA	Q86YZ3	Q86YZ3	HRNR	Hornerin	Q86YZ3	HORN_HUMAN	Filtered	636.101	338.552
libDIA-22xlib	P50238	P50238	CRIP1	Cysteine-rich protein 1	P50238	CRIP1_HUMAN	Filtered	1936.72	670.375			libDIA-6xlib	P48507	P48507	GCLM	Glutamate--cysteine ligase regulatory subunit	P48507	GSH0_HUMAN	3944.66	5215.86	4059.09			dirDIA	Q8N1N4	Q8N1N4	KRT78	Keratin, type II cytoskeletal 78	Q8N1N4	K2C78_HUMAN	189.358	6490.32	5349.53
libDIA-22xlib	P50395	P50395	GDI2	Rab GDP dissociation inhibitor beta	P50395	GDIB_HUMAN	5335.08	6348.4	6156.06			libDIA-6xlib	P48556	P48556	PSMD8	26S proteasome non-ATPase regulatory subunit 8	P48556	PSMD8_HUMAN	1518.25	3004.71	2269.79			dirDIA	Q8NBJ4	Q8NBJ4	GOLM1	Golgi membrane protein 1	Q8NBJ4	GOLM1_HUMAN	0.800205	506.969	383.889
libDIA-22xlib	P50402	P50402	EMD	Emerin	P50402	EMD_HUMAN	Filtered	Filtered	Filtered			libDIA-6xlib	P48637	P48637	GSS	Glutathione synthetase	P48637	GSHB_HUMAN	2535.8	2364.37	1835.49			dirDIA	Q8NFJ5	Q8NFJ5	GPRC5A	Retinoic acid-induced protein 3	Q8NFJ5	RAI3_HUMAN	1466.79	3077.14	Filtered
libDIA-22xlib	P50454	P50454	SERPINH1	Serpin H1	P50454	SERPH_HUMAN	3570.5	4048.69	4440.12			libDIA-6xlib	P48643	P48643	CCT5	T-complex protein 1 subunit epsilon	P48643	TCPE_HUMAN	2793.4	5762.17	8959.21			dirDIA	Q8TAT6	Q8TAT6	NPLOC4	Nuclear protein localization protein 4 homolog	Q8TAT6	NPL4_HUMAN	601.364	1327.32	1969.46
libDIA-22xlib	P50479	P50479	PDLIM4	PDZ and LIM domain protein 4	P50479	PDLI4_HUMAN	Filtered	Filtered	Filtered			libDIA-6xlib	P48735	P48735	IDH2	Isocitrate dehydrogenase [NADP], mitochondrial	P48735	IDHP_HUMAN	Filtered	Filtered	Filtered			dirDIA	Q8TCT9	Q8TCT9	HM13	Minor histocompatibility antigen H13	Q8TCT9	HM13_HUMAN	0.425629	0.511139	1034.38
libDIA-22xlib	P50502	P50502	ST13	Hsc70-interacting protein	P50502	F10A1_HUMAN	4539.6	7288.47	9563.15			libDIA-6xlib	P48739	P48739	PITPNB	Phosphatidylinositol transfer protein beta isoform	P48739	PIPNB_HUMAN	Filtered	Filtered	Filtered			dirDIA	Q8TF09;Q9NP97	Q8TF09;Q9NP97	DYNLRB2;DYNLRB1	Dynein light chain roadblock-type 2;Dynein light chain roadblock-type 1	Q8TF09;Q9NP97	DLRB2_HUMAN;DLRB1_HUMAN	Filtered	1750.94	2479.6
libDIA-22xlib	P50552	P50552	VASP	Vasodilator-stimulated phosphoprotein	P50552	VASP_HUMAN	Filtered	Filtered	Filtered			libDIA-6xlib	P49189	P49189	ALDH9A1	4-trimethylaminobutyraldehyde dehydrogenase	P49189	AL9A1_HUMAN	0.642014	643.326	377.516			dirDIA	Q8WUM4	Q8WUM4	PDCD6IP	Programmed cell death 6-interacting protein	Q8WUM4	PDC6I_HUMAN	216.026	3210.32	4469.58
libDIA-22xlib	P50570	P50570	DNM2	Dynamin-2	P50570	DYN2_HUMAN	Filtered	888.652	1385.94			libDIA-6xlib	P49207	P49207	RPL34	60S ribosomal protein L34	P49207	RL34_HUMAN	5632.72	5526.71	5424.92			dirDIA	Q92522	Q92522	H1FX	Histone H1x	Q92522	H1X_HUMAN	Filtered	888.211	Filtered
libDIA-22xlib	P50914	P50914	RPL14	60S ribosomal protein L14	P50914	RL14_HUMAN	12504.8	19949.6	21313.8			libDIA-6xlib	P49257	P49257	LMAN1	Protein ERGIC-53	P49257	LMAN1_HUMAN	Filtered	1517.77	1386.12			dirDIA	Q92598	Q92598	HSPH1	Heat shock protein 105 kDa	Q92598	HS105_HUMAN	1852.62	3366.21	4380.39
libDIA-22xlib	P50990	P50990	CCT8	T-complex protein 1 subunit theta	P50990	TCPQ_HUMAN	5834.41	8155.08	8976.34			libDIA-6xlib	P49321	P49321	NASP	Nuclear autoantigenic sperm protein	P49321	NASP_HUMAN	2260.18	2831.36	5550.82			dirDIA	Q92688	Q92688	ANP32B	Acidic leucine-rich nuclear phosphoprotein 32 family member B	Q92688	AN32B_HUMAN	2.83092	1.36496	1.3448
libDIA-22xlib	P50991	P50991	CCT4	T-complex protein 1 subunit delta	P50991	TCPD_HUMAN	4516.16	3657.06	8071.84			libDIA-6xlib	P49327	P49327	FASN	Fatty acid synthase	P49327	FAS_HUMAN	2426.69	3156.58	4596.7			dirDIA	Q92734	Q92734	TFG	Protein TFG	Q92734	TFG_HUMAN	4353.26	6214.24	4822.03
libDIA-22xlib	P50995	P50995	ANXA11	Annexin A11	P50995	ANX11_HUMAN	1544.7	2746.53	3161.18			libDIA-6xlib	P49368	P49368	CCT3	T-complex protein 1 subunit gamma	P49368	TCPG_HUMAN	4790.92	4628.98	5959.39			dirDIA	Q92841	Q92841	DDX17	Probable ATP-dependent RNA helicase DDX17	Q92841	DDX17_HUMAN	5614.98	7198.8	8861.04
libDIA-22xlib	P51114	P51114	FXR1	Fragile X mental retardation syndrome-related protein 1	P51114	FXR1_HUMAN	2996.06	1916.19	2082.93			libDIA-6xlib	P49406	P49406	MRPL19	39S ribosomal protein L19, mitochondrial	P49406	RM19_HUMAN	Filtered	Filtered	Filtered			dirDIA	Q92945	Q92945	KHSRP	Far upstream element-binding protein 2	Q92945	FUBP2_HUMAN	2317.59	2776.34	3444.31
libDIA-22xlib	P51148	P51148	RAB5C	Ras-related protein Rab-5C	P51148	RAB5C_HUMAN	4858.71	4670.2	2414.52			libDIA-6xlib	P49411	P49411	TUFM	Elongation factor Tu, mitochondrial	P49411	EFTU_HUMAN	3505.2	3864.63	6415.57			dirDIA	Q92973	Q92973	TNPO1	Transportin-1	Q92973	TNPO1_HUMAN	196.042	2809.29	1787.83
libDIA-22xlib	P51149	P51149	RAB7A	Ras-related protein Rab-7a	P51149	RAB7A_HUMAN	5032.75	5741.31	5829.83			libDIA-6xlib	P49419	P49419	ALDH7A1	Alpha-aminoadipic semialdehyde dehydrogenase	P49419	AL7A1_HUMAN	Filtered	Filtered	Filtered			dirDIA	Q96AE4	Q96AE4	FUBP1	Far upstream element-binding protein 1	Q96AE4	FUBP1_HUMAN	2415.76	2780.28	4768.19
libDIA-22xlib	P51571	P51571	SSR4	Translocon-associated protein subunit delta	P51571	SSRD_HUMAN	Filtered	Filtered	Filtered			libDIA-6xlib	P49458	P49458	SRP9	Signal recognition particle 9 kDa protein	P49458	SRP09_HUMAN	Filtered	Filtered	Filtered			dirDIA	Q96C19	Q96C19	EFHD2	EF-hand domain-containing protein D2	Q96C19	EFHD2_HUMAN	5782.38	7263.71	9955.13
libDIA-22xlib	P51648	P51648	ALDH3A2	Fatty aldehyde dehydrogenase	P51648	AL3A2_HUMAN	Filtered	383.759	Filtered			libDIA-6xlib	P49585;Q9Y5K3	P49585;Q9Y5K3	PCYT1A;PCYT1B	Choline-phosphate cytidylyltransferase A;Choline-phosphate cytidylyltransferase B	P49585;Q9Y5K3	PCY1A_HUMAN;PCY1B_HUMAN	764.553	839.749	1199.53			dirDIA	Q96FQ6	Q96FQ6	S100A16	Protein S100-A16	Q96FQ6	S10AG_HUMAN	0.6509	674.088	1258.7
libDIA-22xlib	P51659	P51659	HSD17B4	Peroxisomal multifunctional enzyme type 2	P51659	DHB4_HUMAN	Filtered	1803.69	Filtered			libDIA-6xlib	P49588	P49588	AARS	Alanine--tRNA ligase, cytoplasmic	P49588	SYAC_HUMAN	Filtered	Filtered	0.633774			dirDIA	Q96FW1	Q96FW1	OTUB1	Ubiquitin thioesterase OTUB1	Q96FW1	OTUB1_HUMAN	1598.08	1432.56	1212.11
libDIA-22xlib	P51665	P51665	PSMD7	26S proteasome non-ATPase regulatory subunit 7	P51665	PSMD7_HUMAN	Filtered	Filtered	Filtered			libDIA-6xlib	P49589	P49589	CARS	Cysteine--tRNA ligase, cytoplasmic	P49589	SYCC_HUMAN	Filtered	Filtered	Filtered			dirDIA	Q96HE7	Q96HE7	ERO1A	ERO1-like protein alpha	Q96HE7	ERO1A_HUMAN	0.469975	3155.29	732.545
libDIA-22xlib	P51858	P51858	HDGF	Hepatoma-derived growth factor	P51858	HDGF_HUMAN	3308.6	3597.09	3500.42			libDIA-6xlib	P49591	P49591	SARS	Serine--tRNA ligase, cytoplasmic	P49591	SYSC_HUMAN	Filtered	Filtered	Filtered			dirDIA	Q96HU8	Q96HU8	DIRAS2	GTP-binding protein Di-Ras2	Q96HU8	DIRA2_HUMAN	13250.5	11560.9	18857.9
libDIA-22xlib	P51991	P51991	HNRNPA3	Heterogeneous nuclear ribonucleoprotein A3	P51991	ROA3_HUMAN	3770.48	5688.6	4072.37			libDIA-6xlib	P49720	P49720	PSMB3	Proteasome subunit beta type-3	P49720	PSB3_HUMAN	Filtered	Filtered	Filtered			dirDIA	Q96KP4	Q96KP4	CNDP2	Cytosolic non-specific dipeptidase	Q96KP4	CNDP2_HUMAN	1251.61	1157.52	1747.89
libDIA-22xlib	P52209	P52209	PGD	6-phosphogluconate dehydrogenase, decarboxylating	P52209	6PGD_HUMAN	3909.59	3424.56	2877			libDIA-6xlib	P49721	P49721	PSMB2	Proteasome subunit beta type-2	P49721	PSB2_HUMAN	2249.56	2625.2	2435.03			dirDIA	Q96M69	Q96M69	LRGUK	Leucine-rich repeat and guanylate kinase domain-containing protein	Q96M69	LRGUK_HUMAN	Filtered	1116.89	2933.07
libDIA-22xlib	P52272	P52272	HNRNPM	Heterogeneous nuclear ribonucleoprotein M	P52272	HNRPM_HUMAN	2475.4	2957.98	1924.21			libDIA-6xlib	P49736	P49736	MCM2	DNA replication licensing factor MCM2	P49736	MCM2_HUMAN	1278.14	1516.77	2454.05			dirDIA	Q96N66	Q96N66	MBOAT7	Lysophospholipid acyltransferase 7	Q96N66	MBOA7_HUMAN	2082.18	3793.73	3663.17
libDIA-22xlib	P52292	P52292	KPNA2	Importin subunit alpha-1	P52292	IMA1_HUMAN	Filtered	Filtered	616.275			libDIA-6xlib	P49748	P49748	ACADVL	Very long-chain specific acyl-CoA dehydrogenase, mitochondrial	P49748	ACADV_HUMAN	0.460716	Filtered	Filtered			dirDIA	Q96P63	Q96P63	SERPINB12	Serpin B12	Q96P63	SPB12_HUMAN	1954.76	15133.6	4715.79
libDIA-22xlib	P52565	P52565	ARHGDIA	Rho GDP-dissociation inhibitor 1	P52565	GDIR1_HUMAN	10251.1	9381.1	11165.7			libDIA-6xlib	P49750	P49750	YLPM1	YLP motif-containing protein 1	P49750	YLPM1_HUMAN	Filtered	Filtered	Filtered			dirDIA	Q96TA1	Q96TA1	FAM129B	Niban-like protein 1	Q96TA1	NIBL1_HUMAN	1421.99	3511.09	3143.27
libDIA-22xlib	P52566	P52566	ARHGDIB	Rho GDP-dissociation inhibitor 2	P52566	GDIR2_HUMAN	3577.47	5547.11	4170.93			libDIA-6xlib	P49755	P49755	TMED10	Transmembrane emp24 domain-containing protein 10	P49755	TMEDA_HUMAN	Filtered	Filtered	163.687			dirDIA	Q99460	Q99460	PSMD1	26S proteasome non-ATPase regulatory subunit 1	Q99460	PSMD1_HUMAN	1344.3	2395.45	3018
libDIA-22xlib	P52597	P52597	HNRNPF	Heterogeneous nuclear ribonucleoprotein F	P52597	HNRPF_HUMAN	0.527181	Filtered	1386.03			libDIA-6xlib	P49756	P49756	RBM25	RNA-binding protein 25	P49756	RBM25_HUMAN	Filtered	Filtered	Filtered			dirDIA	Q99471	Q99471	PFDN5	Prefoldin subunit 5	Q99471	PFD5_HUMAN	236.858	575.554	Filtered
libDIA-22xlib	P52701	P52701	MSH6	DNA mismatch repair protein Msh6	P52701	MSH6_HUMAN	Filtered	Filtered	Filtered			libDIA-6xlib	P49770	P49770	EIF2B2	Translation initiation factor eIF-2B subunit beta	P49770	EI2BB_HUMAN	Filtered	Filtered	Filtered			dirDIA	Q99497	Q99497	PARK7	Protein deglycase DJ-1	Q99497	PARK7_HUMAN	695.713	949.809	1168.5
libDIA-22xlib	P52758	P52758	HRSP12	Ribonuclease UK114	P52758	UK114_HUMAN	Filtered	Filtered	0.830967			libDIA-6xlib	P49773	P49773	HINT1	Histidine triad nucleotide-binding protein 1	P49773	HINT1_HUMAN	7529.67	8957.29	2646.26			dirDIA	Q99536	Q99536	VAT1	Synaptic vesicle membrane protein VAT-1 homolog	Q99536	VAT1_HUMAN	Filtered	547.668	2155.9
libDIA-22xlib	P52788	P52788	SMS	Spermine synthase	P52788	SPSY_HUMAN	Filtered	Filtered	Filtered			libDIA-6xlib	P49790	P49790	NUP153	Nuclear pore complex protein Nup153	P49790	NU153_HUMAN	Filtered	Filtered	Filtered			dirDIA	Q99584	Q99584	S100A13	Protein S100-A13	Q99584	S10AD_HUMAN	1518.12	3259.83	3114.69
libDIA-22xlib	P52815	P52815	MRPL12	39S ribosomal protein L12, mitochondrial	P52815	RM12_HUMAN	Filtered	2699.71	2959.3			libDIA-6xlib	P49821	P49821	NDUFV1	NADH dehydrogenase [ubiquinone] flavoprotein 1, mitochondrial	P49821	NDUV1_HUMAN	Filtered	Filtered	Filtered			dirDIA	Q99623	Q99623	PHB2	Prohibitin-2	Q99623	PHB2_HUMAN	2804.31	2705.75	2223.84
libDIA-22xlib	P52895	P52895	AKR1C2	Aldo-keto reductase family 1 member C2	P52895	AK1C2_HUMAN	1729.14	Filtered	Filtered			libDIA-6xlib	P49915	P49915	GMPS	GMP synthase [glutamine-hydrolyzing]	P49915	GUAA_HUMAN	490.81	3200.6	1987.78			dirDIA	Q99714	Q99714	HSD17B10	3-hydroxyacyl-CoA dehydrogenase type-2	Q99714	HCD2_HUMAN	Filtered	1636.19	2319.09
libDIA-22xlib	P52907	P52907	CAPZA1	F-actin-capping protein subunit alpha-1	P52907	CAZA1_HUMAN	4869.28	3734.6	3584.79			libDIA-6xlib	P49959	P49959	MRE11A	Double-strand break repair protein MRE11A	P49959	MRE11_HUMAN	Filtered	Filtered	Filtered			dirDIA	Q99729	Q99729	HNRNPAB	Heterogeneous nuclear ribonucleoprotein A/B	Q99729	ROAA_HUMAN	598.326	Filtered	Filtered
libDIA-22xlib	P53004	P53004	BLVRA	Biliverdin reductase A	P53004	BIEA_HUMAN	Filtered	Filtered	Filtered			libDIA-6xlib	P50213	P50213	IDH3A	Isocitrate dehydrogenase [NAD] subunit alpha, mitochondrial	P50213	IDH3A_HUMAN	Filtered	Filtered	Filtered			dirDIA	Q99735	Q99735	MGST2	Microsomal glutathione S-transferase 2	Q99735	MGST2_HUMAN	Filtered	1815.15	Filtered
libDIA-22xlib	P53367	P53367	ARFIP1	Arfaptin-1	P53367	ARFP1_HUMAN	1356.44	2258.58	4786.72			libDIA-6xlib	P50238	P50238	CRIP1	Cysteine-rich protein 1	P50238	CRIP1_HUMAN	1443.8	1936.7	670.338			dirDIA	Q99832	Q99832	CCT7	T-complex protein 1 subunit eta	Q99832	TCPH_HUMAN	1684.62	2162.43	2489.92
libDIA-22xlib	P53396	P53396	ACLY	ATP-citrate synthase	P53396	ACLY_HUMAN	289.741	406.028	0.658104			libDIA-6xlib	P50395	P50395	GDI2	Rab GDP dissociation inhibitor beta	P50395	GDIB_HUMAN	5335.09	5598.67	6156.04			dirDIA	Q99848	Q99848	EBNA1BP2	Probable rRNA-processing protein EBP2	Q99848	EBP2_HUMAN	254.174	Filtered	Filtered
libDIA-22xlib	P53602	P53602	MVD	Diphosphomevalonate decarboxylase	P53602	MVD1_HUMAN	712.644	Filtered	5.09632			libDIA-6xlib	P50402	P50402	EMD	Emerin	P50402	EMD_HUMAN	Filtered	Filtered	Filtered			dirDIA	Q99873	Q99873	PRMT1	Protein arginine N-methyltransferase 1	Q99873	ANM1_HUMAN	5946.17	9816.37	12355.6
libDIA-22xlib	P53618	P53618	COPB1	Coatomer subunit beta	P53618	COPB_HUMAN	Filtered	1520.08	Filtered			libDIA-6xlib	P50454	P50454	SERPINH1	Serpin H1	P50454	SERPH_HUMAN	3434.74	3861.4	4371.34			dirDIA	Q9BPX5	Q9BPX5	ARPC5L	Actin-related protein 2/3 complex subunit 5-like protein	Q9BPX5	ARP5L_HUMAN	Filtered	1854.34	2977.72
libDIA-22xlib	P53621	P53621	COPA	Coatomer subunit alpha	P53621	COPA_HUMAN	Filtered	1461.8	4041.37			libDIA-6xlib	P50479	P50479	PDLIM4	PDZ and LIM domain protein 4	P50479	PDLI4_HUMAN	Filtered	Filtered	Filtered			dirDIA	Q9BR76	Q9BR76	CORO1B	Coronin-1B	Q9BR76	COR1B_HUMAN	Filtered	4183.04	3601.34
libDIA-22xlib	P53634	P53634	CTSC	Dipeptidyl peptidase 1	P53634	CATC_HUMAN	Filtered	870.609	Filtered			libDIA-6xlib	P50502	P50502	ST13	Hsc70-interacting protein	P50502	F10A1_HUMAN	4460.79	7275.88	9537.87			dirDIA	Q9BRA2	Q9BRA2	TXNDC17	Thioredoxin domain-containing protein 17	Q9BRA2	TXD17_HUMAN	877.543	1747.55	Filtered
libDIA-22xlib	P53985	P53985	SLC16A1	Monocarboxylate transporter 1	P53985	MOT1_HUMAN	544.948	Filtered	1.45481			libDIA-6xlib	P50552	P50552	VASP	Vasodilator-stimulated phosphoprotein	P50552	VASP_HUMAN	Filtered	Filtered	Filtered			dirDIA	Q9BRJ6	Q9BRJ6	C7orf50	Uncharacterized protein C7orf50	Q9BRJ6	CG050_HUMAN	Filtered	Filtered	Filtered
libDIA-22xlib	P53992	P53992	SEC24C	Protein transport protein Sec24C	P53992	SC24C_HUMAN	Filtered	Filtered	Filtered			libDIA-6xlib	P50570	P50570	DNM2	Dynamin-2	P50570	DYN2_HUMAN	682.169	888.697	1385.96			dirDIA	Q9BS26	Q9BS26	ERP44	Endoplasmic reticulum resident protein 44	Q9BS26	ERP44_HUMAN	Filtered	675.774	Filtered
libDIA-22xlib	P53999	P53999	SUB1	Activated RNA polymerase II transcriptional coactivator p15	P53999	TCP4_HUMAN	24963.6	28001.6	29509.6			libDIA-6xlib	P50583	P50583	NUDT2	Bis(5'-nucleosyl)-tetraphosphatase [asymmetrical]	P50583	AP4A_HUMAN	Filtered	Filtered	Filtered			dirDIA	Q9BTT0	Q9BTT0	ANP32E	Acidic leucine-rich nuclear phosphoprotein 32 family member E	Q9BTT0	AN32E_HUMAN	168.066	1159.46	854.18
libDIA-22xlib	P54105	P54105	CLNS1A	Methylosome subunit pICln	P54105	ICLN_HUMAN	0.416359	0.788979	Filtered			libDIA-6xlib	P50914	P50914	RPL14	60S ribosomal protein L14	P50914	RL14_HUMAN	12582.9	10086.6	21218.6			dirDIA	Q9BVC6	Q9BVC6	TMEM109	Transmembrane protein 109	Q9BVC6	TM109_HUMAN	Filtered	6813.46	3680.02
libDIA-22xlib	P54136	P54136	RARS	Arginine--tRNA ligase, cytoplasmic	P54136	SYRC_HUMAN	2821.57	1596.57	1154.82			libDIA-6xlib	P50990	P50990	CCT8	T-complex protein 1 subunit theta	P50990	TCPQ_HUMAN	5787.38	9523.52	10723.9			dirDIA	Q9BZZ5	Q9BZZ5	API5	Apoptosis inhibitor 5	Q9BZZ5	API5_HUMAN	0.317986	Filtered	1730.18
libDIA-22xlib	P54577	P54577	YARS	Tyrosine--tRNA ligase, cytoplasmic	P54577	SYYC_HUMAN	1022.48	999.385	3837.24			libDIA-6xlib	P50991	P50991	CCT4	T-complex protein 1 subunit delta	P50991	TCPD_HUMAN	2646.54	3090.53	4996.69			dirDIA	Q9C005	Q9C005	DPY30	Protein dpy-30 homolog	Q9C005	DPY30_HUMAN	1433.94	1874.76	Filtered
libDIA-22xlib	P54578	P54578	USP14	Ubiquitin carboxyl-terminal hydrolase 14	P54578	UBP14_HUMAN	3641.65	4310.09	4883.33			libDIA-6xlib	P50995	P50995	ANXA11	Annexin A11	P50995	ANX11_HUMAN	2483.39	3889.62	4615.87			dirDIA	Q9C0B1	Q9C0B1	FTO	Alpha-ketoglutarate-dependent dioxygenase FTO	Q9C0B1	FTO_HUMAN	431365	341426	394219
libDIA-22xlib	P54687	P54687	BCAT1	Branched-chain-amino-acid aminotransferase, cytosolic	P54687	BCAT1_HUMAN	Filtered	620.801	Filtered			libDIA-6xlib	P51114	P51114	FXR1	Fragile X mental retardation syndrome-related protein 1	P51114	FXR1_HUMAN	571.046	900.467	868.695			dirDIA	Q9H074	Q9H074	PAIP1	Polyadenylate-binding protein-interacting protein 1	Q9H074	PAIP1_HUMAN	1256.95	1626.3	2408.57
libDIA-22xlib	P54725	P54725	RAD23A	UV excision repair protein RAD23 homolog A	P54725	RD23A_HUMAN	3637.59	5085.34	3458.09			libDIA-6xlib	P51116	P51116	FXR2	Fragile X mental retardation syndrome-related protein 2	P51116	FXR2_HUMAN	2982.26	4043.38	2468.23			dirDIA	Q9H0U4	Q9H0U4	RAB1B	Ras-related protein Rab-1B	Q9H0U4	RAB1B_HUMAN	Filtered	Filtered	Filtered
libDIA-22xlib	P54727	P54727	RAD23B	UV excision repair protein RAD23 homolog B	P54727	RD23B_HUMAN	2874.26	5975.04	4044.89			libDIA-6xlib	P51148	P51148	RAB5C	Ras-related protein Rab-5C	P51148	RAB5C_HUMAN	4712.32	4670.2	1418.4			dirDIA	Q9H223	Q9H223	EHD4	EH domain-containing protein 4	Q9H223	EHD4_HUMAN	Filtered	Filtered	Filtered
libDIA-22xlib	P54819	P54819	AK2	Adenylate kinase 2, mitochondrial	P54819	KAD2_HUMAN	Filtered	1026.5	1999.08			libDIA-6xlib	P51149	P51149	RAB7A	Ras-related protein Rab-7a	P51149	RAB7A_HUMAN	5535.29	6294.28	6002.09			dirDIA	Q9H2G4	Q9H2G4	TSPYL2	Testis-specific Y-encoded-like protein 2	Q9H2G4	TSYL2_HUMAN	388487	398499	170997
libDIA-22xlib	P54920	P54920	NAPA	Alpha-soluble NSF attachment protein	P54920	SNAA_HUMAN	0.425743	Filtered	Filtered			libDIA-6xlib	P51151	P51151	RAB9A	Ras-related protein Rab-9A	P51151	RAB9A_HUMAN	Filtered	Filtered	Filtered			dirDIA	Q9H2U2	Q9H2U2	PPA2	Inorganic pyrophosphatase 2, mitochondrial	Q9H2U2	IPYR2_HUMAN	317.269	711.683	Filtered
libDIA-22xlib	P55010	P55010	EIF5	Eukaryotic translation initiation factor 5	P55010	IF5_HUMAN	2547.97	3134.17	4392.67			libDIA-6xlib	P51553	P51553	IDH3G	Isocitrate dehydrogenase [NAD] subunit gamma, mitochondrial	P51553	IDH3G_HUMAN	Filtered	Filtered	Filtered			dirDIA	Q9H3K6	Q9H3K6	BOLA2	BolA-like protein 2	Q9H3K6	BOLA2_HUMAN	1073.02	2895.2	Filtered
libDIA-22xlib	P55036	P55036	PSMD4	26S proteasome non-ATPase regulatory subunit 4	P55036	PSMD4_HUMAN	Filtered	Filtered	Filtered			libDIA-6xlib	P51571	P51571	SSR4	Translocon-associated protein subunit delta	P51571	SSRD_HUMAN	Filtered	0.633659	Filtered			dirDIA	Q9H444	Q9H444	CHMP4B	Charged multivesicular body protein 4b	Q9H444	CHM4B_HUMAN	0.465946	453.075	Filtered
libDIA-22xlib	P55060	P55060	CSE1L	Exportin-2	P55060	XPO2_HUMAN	4397.67	5951	9452.91			libDIA-6xlib	P51648	P51648	ALDH3A2	Fatty aldehyde dehydrogenase	P51648	AL3A2_HUMAN	613.419	192.133	95.2438			dirDIA	Q9H4M9	Q9H4M9	EHD1	EH domain-containing protein 1	Q9H4M9	EHD1_HUMAN	Filtered	0.430458	2058.1
libDIA-22xlib	P55072	P55072	VCP	Transitional endoplasmic reticulum ATPase	P55072	TERA_HUMAN	5228.34	7819.6	9708.8			libDIA-6xlib	P51659	P51659	HSD17B4	Peroxisomal multifunctional enzyme type 2	P51659	DHB4_HUMAN	Filtered	1803.63	880.385			dirDIA	Q9H910	Q9H910	HN1L	Hematological and neurological expressed 1-like protein	Q9H910	HN1L_HUMAN	1790.11	2936.55	1878.33
libDIA-22xlib	P55084	P55084	HADHB	Trifunctional enzyme subunit beta, mitochondrial	P55084	ECHB_HUMAN	Filtered	Filtered	Filtered			libDIA-6xlib	P51858	P51858	HDGF	Hepatoma-derived growth factor	P51858	HDGF_HUMAN	3405.03	6990.87	2730.22			dirDIA	Q9HB71	Q9HB71	CACYBP	Calcyclin-binding protein	Q9HB71	CYBP_HUMAN	Filtered	Filtered	Filtered
libDIA-22xlib	P55209	P55209	NAP1L1	Nucleosome assembly protein 1-like 1	P55209	NP1L1_HUMAN	4335.09	5921.08	8339.59			libDIA-6xlib	P51991	P51991	HNRNPA3	Heterogeneous nuclear ribonucleoprotein A3	P51991	ROA3_HUMAN	3371.14	5688.58	6254.64			dirDIA	Q9HC38	Q9HC38	GLOD4	Glyoxalase domain-containing protein 4	Q9HC38	GLOD4_HUMAN	599.884	400.176	Filtered
libDIA-22xlib	P55263	P55263	ADK	Adenosine kinase	P55263	ADK_HUMAN	3263.17	6338.27	Filtered			libDIA-6xlib	P52209	P52209	PGD	6-phosphogluconate dehydrogenase, decarboxylating	P52209	6PGD_HUMAN	3816.44	3578.86	3160.12			dirDIA	Q9HDC9	Q9HDC9	APMAP	Adipocyte plasma membrane-associated protein	Q9HDC9	APMAP_HUMAN	712.589	1185.5	645.812
libDIA-22xlib	P55265	P55265	ADAR	Double-stranded RNA-specific adenosine deaminase	P55265	DSRAD_HUMAN	Filtered	Filtered	Filtered			libDIA-6xlib	P52272	P52272	HNRNPM	Heterogeneous nuclear ribonucleoprotein M	P52272	HNRPM_HUMAN	2949.73	2837.54	3990.28			dirDIA	Q9NPJ3	Q9NPJ3	ACOT13	Acyl-coenzyme A thioesterase 13	Q9NPJ3	ACO13_HUMAN	0.644405	199.223	Filtered
libDIA-22xlib	P55327	P55327	TPD52	Tumor protein D52	P55327	TPD52_HUMAN	Filtered	Filtered	Filtered			libDIA-6xlib	P52292	P52292	KPNA2	Importin subunit alpha-1	P52292	IMA1_HUMAN	Filtered	Filtered	Filtered			dirDIA	Q9NQC3	Q9NQC3	RTN4	Reticulon-4	Q9NQC3	RTN4_HUMAN	8036.44	14677.5	11782.5
libDIA-22xlib	P55769	P55769	SNU13	NHP2-like protein 1	P55769	NH2L1_HUMAN	552.096	Filtered	Filtered			libDIA-6xlib	P52294	P52294	KPNA1	Importin subunit alpha-5	P52294	IMA5_HUMAN	Filtered	Filtered	Filtered			dirDIA	Q9NQR4	Q9NQR4	NIT2	Omega-amidase NIT2	Q9NQR4	NIT2_HUMAN	0.421028	Filtered	Filtered
libDIA-22xlib	P55786	P55786	NPEPPS	Puromycin-sensitive aminopeptidase	P55786	PSA_HUMAN	1237.24	2023.9	Filtered			libDIA-6xlib	P52298	P52298	NCBP2	Nuclear cap-binding protein subunit 2	P52298	NCBP2_HUMAN	Filtered	Filtered	Filtered			dirDIA	Q9NR30	Q9NR30	DDX21	Nucleolar RNA helicase 2	Q9NR30	DDX21_HUMAN	3815.44	3322.63	4927.09
libDIA-22xlib	P55854;P61956;Q6EEV6	P55854;P61956;Q6EEV6	SUMO3;SUMO2;SUMO4	Small ubiquitin-related modifier 3;Small ubiquitin-related modifier 2;Small ubiquitin-related modifier 4	P55854;P61956;Q6EEV6	SUMO3_HUMAN;SUMO2_HUMAN;SUMO4_HUMAN	8056.06	8026.49	7255.27			libDIA-6xlib	P52565	P52565	ARHGDIA	Rho GDP-dissociation inhibitor 1	P52565	GDIR1_HUMAN	9728.43	13469.1	11066.3			dirDIA	Q9NR31;Q9Y6B6	Q9NR31;Q9Y6B6	SAR1A;SAR1B	GTP-binding protein SAR1a;GTP-binding protein SAR1b	Q9NR31;Q9Y6B6	SAR1A_HUMAN;SAR1B_HUMAN	1299.57	2910.33	1485.86
libDIA-22xlib	P55884	P55884	EIF3B	Eukaryotic translation initiation factor 3 subunit B	P55884	EIF3B_HUMAN	3569.3	4806.5	5146.42			libDIA-6xlib	P52566	P52566	ARHGDIB	Rho GDP-dissociation inhibitor 2	P52566	GDIR2_HUMAN	2639.16	5756.03	4197.67			dirDIA	Q9NRV9	Q9NRV9	HEBP1	Heme-binding protein 1	Q9NRV9	HEBP1_HUMAN	1291.15	3222.01	Filtered
libDIA-22xlib	P55957	P55957	BID	BH3-interacting domain death agonist	P55957	BID_HUMAN	1087.7	1591.15	1694			libDIA-6xlib	P52597	P52597	HNRNPF	Heterogeneous nuclear ribonucleoprotein F	P52597	HNRPF_HUMAN	0.617105	Filtered	867.958			dirDIA	Q9NSB4	Q9NSB4	KRT82	Keratin, type II cuticular Hb2	Q9NSB4	KRT82_HUMAN	17661.6	681.061	Filtered
libDIA-22xlib	P56182	P56182	RRP1	Ribosomal RNA processing protein 1 homolog A	P56182	RRP1_HUMAN	Filtered	Filtered	Filtered			libDIA-6xlib	P52701	P52701	MSH6	DNA mismatch repair protein Msh6	P52701	MSH6_HUMAN	Filtered	Filtered	Filtered			dirDIA	Q9NSE4	Q9NSE4	IARS2	Isoleucine--tRNA ligase, mitochondrial	Q9NSE4	SYIM_HUMAN	0.397545	Filtered	Filtered
libDIA-22xlib	P56192	P56192	MARS	Methionine--tRNA ligase, cytoplasmic	P56192	SYMC_HUMAN	Filtered	1230.83	Filtered			libDIA-6xlib	P52788	P52788	SMS	Spermine synthase	P52788	SPSY_HUMAN	Filtered	Filtered	Filtered			dirDIA	Q9NTJ3	Q9NTJ3	SMC4	Structural maintenance of chromosomes protein 4	Q9NTJ3	SMC4_HUMAN	Filtered	Filtered	Filtered
libDIA-22xlib	P56385	P56385	ATP5I	ATP synthase subunit e, mitochondrial	P56385	ATP5I_HUMAN	Filtered	Filtered	Filtered			libDIA-6xlib	P52815	P52815	MRPL12	39S ribosomal protein L12, mitochondrial	P52815	RM12_HUMAN	615.378	2598.71	2959.26			dirDIA	Q9NTK5	Q9NTK5	OLA1	Obg-like ATPase 1	Q9NTK5	OLA1_HUMAN	6680.16	9242.54	15907.9
libDIA-22xlib	P56537	P56537	EIF6	Eukaryotic translation initiation factor 6	P56537	IF6_HUMAN	9568.11	5085.52	7870.14			libDIA-6xlib	P52888	P52888	THOP1	Thimet oligopeptidase	P52888	THOP1_HUMAN	Filtered	Filtered	Filtered			dirDIA	Q9NUU7;Q9UMR2	Q9NUU7;Q9UMR2	DDX19A;DDX19B	ATP-dependent RNA helicase DDX19A;ATP-dependent RNA helicase DDX19B	Q9NUU7;Q9UMR2	DD19A_HUMAN;DD19B_HUMAN	Filtered	209.171	Filtered
libDIA-22xlib	P57088	P57088	TMEM33	Transmembrane protein 33	P57088	TMM33_HUMAN	Filtered	Filtered	Filtered			libDIA-6xlib	P52895	P52895	AKR1C2	Aldo-keto reductase family 1 member C2	P52895	AK1C2_HUMAN	Filtered	Filtered	Filtered			dirDIA	Q9NX63	Q9NX63	CHCHD3	MICOS complex subunit MIC19	Q9NX63	MIC19_HUMAN	Filtered	174.951	Filtered
libDIA-22xlib	P57105	P57105	SYNJ2BP	Synaptojanin-2-binding protein	P57105	SYJ2B_HUMAN	Filtered	Filtered	Filtered			libDIA-6xlib	P52907	P52907	CAPZA1	F-actin-capping protein subunit alpha-1	P52907	CAZA1_HUMAN	3781.31	5636.79	4668.81			dirDIA	Q9NY33	Q9NY33	DPP3	Dipeptidyl peptidase 3	Q9NY33	DPP3_HUMAN	674.577	555.774	1333.9
libDIA-22xlib	P57735	P57735	RAB25	Ras-related protein Rab-25	P57735	RAB25_HUMAN	Filtered	Filtered	Filtered			libDIA-6xlib	P53004	P53004	BLVRA	Biliverdin reductase A	P53004	BIEA_HUMAN	Filtered	413.195	167.553			dirDIA	Q9NZ01	Q9NZ01	TECR	Very-long-chain enoyl-CoA reductase	Q9NZ01	TECR_HUMAN	Filtered	0.630878	Filtered
libDIA-22xlib	P57764	P57764	GSDMD	Gasdermin-D	P57764	GSDMD_HUMAN	Filtered	Filtered	Filtered			libDIA-6xlib	P53367	P53367	ARFIP1	Arfaptin-1	P53367	ARFP1_HUMAN	Filtered	Filtered	Filtered			dirDIA	Q9NZL9	Q9NZL9	MAT2B	Methionine adenosyltransferase 2 subunit beta	Q9NZL9	MAT2B_HUMAN	Filtered	Filtered	1565.98
libDIA-22xlib	P58107	P58107	EPPK1	Epiplakin	P58107	EPIPL_HUMAN	Filtered	221.92	230.252			libDIA-6xlib	P53396	P53396	ACLY	ATP-citrate synthase	P53396	ACLY_HUMAN	796.936	961.544	639.304			dirDIA	Q9P035	Q9P035	HACD3	Very-long-chain (3R)-3-hydroxyacyl-CoA dehydratase 3	Q9P035	HACD3_HUMAN	Filtered	701.717	Filtered
libDIA-22xlib	P59998	P59998	ARPC4	Actin-related protein 2/3 complex subunit 4	P59998	ARPC4_HUMAN	8377.29	10813	7166.48			libDIA-6xlib	P53602	P53602	MVD	Diphosphomevalonate decarboxylase	P53602	MVD1_HUMAN	798.25	Filtered	Filtered			dirDIA	Q9P258	Q9P258	RCC2	Protein RCC2	Q9P258	RCC2_HUMAN	0.624413	0.458559	0.454634
libDIA-22xlib	P60174	P60174	TPI1	Triosephosphate isomerase	P60174	TPIS_HUMAN	4569.57	4119.52	3750.35			libDIA-6xlib	P53618	P53618	COPB1	Coatomer subunit beta	P53618	COPB_HUMAN	95.7638	751.133	452.256			dirDIA	Q9P2J5	Q9P2J5	LARS	Leucine--tRNA ligase, cytoplasmic	Q9P2J5	SYLC_HUMAN	26661.5	40254.5	30111.3
libDIA-22xlib	P60228	P60228	EIF3E	Eukaryotic translation initiation factor 3 subunit E	P60228	EIF3E_HUMAN	Filtered	Filtered	1163.64			libDIA-6xlib	P53621	P53621	COPA	Coatomer subunit alpha	P53621	COPA_HUMAN	954.826	987.109	1217.03			dirDIA	Q9UBS4	Q9UBS4	DNAJB11	DnaJ homolog subfamily B member 11	Q9UBS4	DJB11_HUMAN	Filtered	Filtered	Filtered
libDIA-22xlib	P60468	P60468	SEC61B	Protein transport protein Sec61 subunit beta	P60468	SC61B_HUMAN	Filtered	Filtered	Filtered			libDIA-6xlib	P53634	P53634	CTSC	Dipeptidyl peptidase 1	P53634	CATC_HUMAN	Filtered	887.228	772.199			dirDIA	Q9UGI8	Q9UGI8	TES	Testin	Q9UGI8	TES_HUMAN	Filtered	1411.65	3857.4
libDIA-22xlib	P60510	P60510	PPP4C	Serine/threonine-protein phosphatase 4 catalytic subunit	P60510	PP4C_HUMAN	Filtered	653.548	Filtered			libDIA-6xlib	P53680	P53680	AP2S1	AP-2 complex subunit sigma	P53680	AP2S1_HUMAN	Filtered	Filtered	Filtered			dirDIA	Q9UHV9	Q9UHV9	PFDN2	Prefoldin subunit 2	Q9UHV9	PFD2_HUMAN	2067.75	1870.68	370.5
libDIA-22xlib	P60660	P60660	MYL6	Myosin light polypeptide 6	P60660	MYL6_HUMAN	12789.2	17696.1	15658			libDIA-6xlib	P53985	P53985	SLC16A1	Monocarboxylate transporter 1	P53985	MOT1_HUMAN	0.573189	210.25	Filtered			dirDIA	Q9UKK9	Q9UKK9	NUDT5	ADP-sugar pyrophosphatase	Q9UKK9	NUDT5_HUMAN	383.215	1607.69	1130.23
libDIA-22xlib	P60709;P63261	P60709;P63261	ACTB;ACTG1	Actin, cytoplasmic 1;Actin, cytoplasmic 2	P60709;P63261	ACTB_HUMAN;ACTG_HUMAN	432916	441955	440812			libDIA-6xlib	P53990	P53990	IST1	IST1 homolog	P53990	IST1_HUMAN	Filtered	Filtered	Filtered			dirDIA	Q9UKM9	Q9UKM9	RALY	RNA-binding protein Raly	Q9UKM9	RALY_HUMAN	3039.56	1890.38	Filtered
libDIA-22xlib	P60842	P60842	EIF4A1	Eukaryotic initiation factor 4A-I	P60842	IF4A1_HUMAN	30557.7	49035.5	41823.3			libDIA-6xlib	P53992	P53992	SEC24C	Protein transport protein Sec24C	P53992	SC24C_HUMAN	Filtered	Filtered	Filtered			dirDIA	Q9UKY7	Q9UKY7	CDV3	Protein CDV3 homolog	Q9UKY7	CDV3_HUMAN	Filtered	Filtered	Filtered
libDIA-22xlib	P60866	P60866	RPS20	40S ribosomal protein S20	P60866	RS20_HUMAN	5688.74	5404.2	4632.52			libDIA-6xlib	P53999	P53999	SUB1	Activated RNA polymerase II transcriptional coactivator p15	P53999	TCP4_HUMAN	27824.9	31268.8	32089.8			dirDIA	Q9UL46	Q9UL46	PSME2	Proteasome activator complex subunit 2	Q9UL46	PSME2_HUMAN	2961.21	1763.88	3408.73
libDIA-22xlib	P60900	P60900	PSMA6	Proteasome subunit alpha type-6	P60900	PSA6_HUMAN	2368.78	4554.27	2694.44			libDIA-6xlib	P54105	P54105	CLNS1A	Methylosome subunit pICln	P54105	ICLN_HUMAN	Filtered	Filtered	Filtered			dirDIA	Q9ULL4	Q9ULL4	PLXNB3	Plexin-B3	Q9ULL4	PLXB3_HUMAN	Filtered	287984	234024
libDIA-22xlib	P60903	P60903	S100A10	Protein S100-A10	P60903	S10AA_HUMAN	31433	44836.8	62930			libDIA-6xlib	P54136	P54136	RARS	Arginine--tRNA ligase, cytoplasmic	P54136	SYRC_HUMAN	2821.58	1349.62	1145.58			dirDIA	Q9ULV4	Q9ULV4	CORO1C	Coronin-1C	Q9ULV4	COR1C_HUMAN	3214.47	3206.49	4426.54
libDIA-22xlib	P60953	P60953	CDC42	Cell division control protein 42 homolog	P60953	CDC42_HUMAN	Filtered	Filtered	1289.79			libDIA-6xlib	P54577	P54577	YARS	Tyrosine--tRNA ligase, cytoplasmic	P54577	SYYC_HUMAN	1022.51	1487.57	2065.66			dirDIA	Q9ULZ3	Q9ULZ3	PYCARD	Apoptosis-associated speck-like protein containing a CARD	Q9ULZ3	ASC_HUMAN	Filtered	929.668	1418.52
libDIA-22xlib	P60981	P60981	DSTN	Destrin	P60981	DEST_HUMAN	1923.12	2598.78	3349.95			libDIA-6xlib	P54578	P54578	USP14	Ubiquitin carboxyl-terminal hydrolase 14	P54578	UBP14_HUMAN	3472.34	4307.47	4889.4			dirDIA	Q9UMS4	Q9UMS4	PRPF19	Pre-mRNA-processing factor 19	Q9UMS4	PRP19_HUMAN	66.9502	562.22	398.542
libDIA-22xlib	P60983	P60983	GMFB	Glia maturation factor beta	P60983	GMFB_HUMAN	Filtered	Filtered	Filtered			libDIA-6xlib	P54687	P54687	BCAT1	Branched-chain-amino-acid aminotransferase, cytosolic	P54687	BCAT1_HUMAN	Filtered	620.825	Filtered			dirDIA	Q9UNM6	Q9UNM6	PSMD13	26S proteasome non-ATPase regulatory subunit 13	Q9UNM6	PSD13_HUMAN	3082.72	4176.77	6728.19
libDIA-22xlib	P61009	P61009	SPCS3	Signal peptidase complex subunit 3	P61009	SPCS3_HUMAN	76802.7	55168.3	76037.2			libDIA-6xlib	P54725	P54725	RAD23A	UV excision repair protein RAD23 homolog A	P54725	RD23A_HUMAN	3637.56	5085.34	3458.13			dirDIA	Q9UQ80	Q9UQ80	PA2G4	Proliferation-associated protein 2G4	Q9UQ80	PA2G4_HUMAN	6452.45	6894.56	6238.1
libDIA-22xlib	P61019	P61019	RAB2A	Ras-related protein Rab-2A	P61019	RAB2A_HUMAN	Filtered	Filtered	Filtered			libDIA-6xlib	P54727	P54727	RAD23B	UV excision repair protein RAD23 homolog B	P54727	RD23B_HUMAN	5038.41	8116.12	5559.31			dirDIA	Q9Y230	Q9Y230	RUVBL2	RuvB-like 2	Q9Y230	RUVB2_HUMAN	3469.07	4817.66	4413.92
libDIA-22xlib	P61024	P61024	CKS1B	Cyclin-dependent kinases regulatory subunit 1	P61024	CKS1_HUMAN	Filtered	Filtered	Filtered			libDIA-6xlib	P54819	P54819	AK2	Adenylate kinase 2, mitochondrial	P54819	KAD2_HUMAN	Filtered	1471.74	1999.06			dirDIA	Q9Y262	Q9Y262	EIF3L	Eukaryotic translation initiation factor 3 subunit L	Q9Y262	EIF3L_HUMAN	0.475502	2245.75	3637.96
libDIA-22xlib	P61026	P61026	RAB10	Ras-related protein Rab-10	P61026	RAB10_HUMAN	Filtered	Filtered	Filtered			libDIA-6xlib	P54886	P54886	ALDH18A1	Delta-1-pyrroline-5-carboxylate synthase	P54886	P5CS_HUMAN	Filtered	Filtered	Filtered			dirDIA	Q9Y265	Q9Y265	RUVBL1	RuvB-like 1	Q9Y265	RUVB1_HUMAN	3566.57	3658.07	4749.01
libDIA-22xlib	P61086	P61086	UBE2K	Ubiquitin-conjugating enzyme E2 K	P61086	UBE2K_HUMAN	1870.53	2882.12	3800.83			libDIA-6xlib	P54920	P54920	NAPA	Alpha-soluble NSF attachment protein	P54920	SNAA_HUMAN	0.425732	Filtered	Filtered			dirDIA	Q9Y266	Q9Y266	NUDC	Nuclear migration protein nudC	Q9Y266	NUDC_HUMAN	1428.29	2756.36	841.03
libDIA-22xlib	P61088	P61088	UBE2N	Ubiquitin-conjugating enzyme E2 N	P61088	UBE2N_HUMAN	9548.87	11150.1	13786.9			libDIA-6xlib	P55010	P55010	EIF5	Eukaryotic translation initiation factor 5	P55010	IF5_HUMAN	3824.8	3082.12	4294.6			dirDIA	Q9Y277	Q9Y277	VDAC3	Voltage-dependent anion-selective channel protein 3	Q9Y277	VDAC3_HUMAN	0.468979	Filtered	Filtered
libDIA-22xlib	P61106	P61106	RAB14	Ras-related protein Rab-14	P61106	RAB14_HUMAN	Filtered	403.573	Filtered			libDIA-6xlib	P55036	P55036	PSMD4	26S proteasome non-ATPase regulatory subunit 4	P55036	PSMD4_HUMAN	Filtered	Filtered	Filtered			dirDIA	Q9Y2T3	Q9Y2T3	GDA	Guanine deaminase	Q9Y2T3	GUAD_HUMAN	Filtered	191.383	184.091
libDIA-22xlib	P61158	P61158	ACTR3	Actin-related protein 3	P61158	ARP3_HUMAN	1599.53	Filtered	4823.45			libDIA-6xlib	P55060	P55060	CSE1L	Exportin-2	P55060	XPO2_HUMAN	4688.15	6463.76	9471.56			dirDIA	Q9Y2W1	Q9Y2W1	THRAP3	Thyroid hormone receptor-associated protein 3	Q9Y2W1	TR150_HUMAN	Filtered	Filtered	281.441
libDIA-22xlib	P61160	P61160	ACTR2	Actin-related protein 2	P61160	ARP2_HUMAN	4271.24	3540.23	6472.8			libDIA-6xlib	P55072	P55072	VCP	Transitional endoplasmic reticulum ATPase	P55072	TERA_HUMAN	5195.16	7902.05	9421.82			dirDIA	Q9Y333	Q9Y333	LSM2	U6 snRNA-associated Sm-like protein LSm2	Q9Y333	LSM2_HUMAN	Filtered	2675.99	Filtered
libDIA-22xlib	P61204;P84077	P61204;P84077	ARF3;ARF1	ADP-ribosylation factor 3;ADP-ribosylation factor 1	P61204;P84077	ARF3_HUMAN;ARF1_HUMAN	13891.6	14998.6	10508.3			libDIA-6xlib	P55084	P55084	HADHB	Trifunctional enzyme subunit beta, mitochondrial	P55084	ECHB_HUMAN	Filtered	Filtered	Filtered			dirDIA	Q9Y383	Q9Y383	LUC7L2	Putative RNA-binding protein Luc7-like 2	Q9Y383	LC7L2_HUMAN	347.32	0.475353	Filtered
libDIA-22xlib	P61221	P61221	ABCE1	ATP-binding cassette sub-family E member 1	P61221	ABCE1_HUMAN	1499.49	2612.74	1811.72			libDIA-6xlib	P55209	P55209	NAP1L1	Nucleosome assembly protein 1-like 1	P55209	NP1L1_HUMAN	4465.05	5832.28	8188.19			dirDIA	Q9Y3B3	Q9Y3B3	TMED7	Transmembrane emp24 domain-containing protein 7	Q9Y3B3	TMED7_HUMAN	0.509148	0.618382	Filtered
libDIA-22xlib	P61224;P62834	P61224;P62834	RAP1B;RAP1A	Ras-related protein Rap-1b;Ras-related protein Rap-1A	P61224;P62834	RAP1B_HUMAN;RAP1A_HUMAN	4505.89	5188.51	3094.52			libDIA-6xlib	P55263	P55263	ADK	Adenosine kinase	P55263	ADK_HUMAN	3263.18	6327.52	Filtered			dirDIA	Q9Y3F4	Q9Y3F4	STRAP	Serine-threonine kinase receptor-associated protein	Q9Y3F4	STRAP_HUMAN	2419.11	2784.73	1335.79
libDIA-22xlib	P61247	P61247	RPS3A	40S ribosomal protein S3a	P61247	RS3A_HUMAN	2509.23	3441.07	2568			libDIA-6xlib	P55265	P55265	ADAR	Double-stranded RNA-specific adenosine deaminase	P55265	DSRAD_HUMAN	Filtered	Filtered	Filtered			dirDIA	Q9Y3I0	Q9Y3I0	RTCB	tRNA-splicing ligase RtcB homolog	Q9Y3I0	RTCB_HUMAN	780.375	1070.27	1436.61
libDIA-22xlib	P61254;Q9UNX3	P61254;Q9UNX3	RPL26;RPL26L1	60S ribosomal protein L26;60S ribosomal protein L26-like 1	P61254;Q9UNX3	RL26_HUMAN;RL26L_HUMAN	10227.3	20962.6	19577.1			libDIA-6xlib	P55327	P55327	TPD52	Tumor protein D52	P55327	TPD52_HUMAN	Filtered	Filtered	Filtered			dirDIA	Q9Y3U8	Q9Y3U8	RPL36	60S ribosomal protein L36	Q9Y3U8	RL36_HUMAN	751.469	2175.68	396.668
libDIA-22xlib	P61289	P61289	PSME3	Proteasome activator complex subunit 3	P61289	PSME3_HUMAN	Filtered	Filtered	2349.86			libDIA-6xlib	P55735	P55735	SEC13	Protein SEC13 homolog	P55735	SEC13_HUMAN	Filtered	Filtered	Filtered			dirDIA	Q9Y4Z0	Q9Y4Z0	LSM4	U6 snRNA-associated Sm-like protein LSm4	Q9Y4Z0	LSM4_HUMAN	Filtered	Filtered	Filtered
libDIA-22xlib	P61313	P61313	RPL15	60S ribosomal protein L15	P61313	RL15_HUMAN	3478.41	9552.15	6938.06			libDIA-6xlib	P55769	P55769	SNU13	NHP2-like protein 1	P55769	NH2L1_HUMAN	917.562	417.315	Filtered			dirDIA	Q9Y5B9	Q9Y5B9	SUPT16H	FACT complex subunit SPT16	Q9Y5B9	SP16H_HUMAN	197.181	268.491	713.496
libDIA-22xlib	P61326;Q96A72	P61326;Q96A72	MAGOH;MAGOHB	Protein mago nashi homolog;Protein mago nashi homolog 2	P61326;Q96A72	MGN_HUMAN;MGN2_HUMAN	2140.94	Filtered	Filtered			libDIA-6xlib	P55786	P55786	NPEPPS	Puromycin-sensitive aminopeptidase	P55786	PSA_HUMAN	756.036	1380.09	960.183			dirDIA	Q9Y5L4	Q9Y5L4	TIMM13	Mitochondrial import inner membrane translocase subunit Tim13	Q9Y5L4	TIM13_HUMAN	Filtered	327.599	Filtered
libDIA-22xlib	P61353	P61353	RPL27	60S ribosomal protein L27	P61353	RL27_HUMAN	11372.5	11823	11014.1			libDIA-6xlib	P55795	P55795	HNRNPH2	Heterogeneous nuclear ribonucleoprotein H2	P55795	HNRH2_HUMAN	Filtered	Filtered	Filtered			dirDIA	Q9Y5S9	Q9Y5S9	RBM8A	RNA-binding protein 8A	Q9Y5S9	RBM8A_HUMAN	Filtered	1560.41	Filtered
libDIA-22xlib	P61421	P61421	ATP6V0D1	V-type proton ATPase subunit d 1	P61421	VA0D1_HUMAN	Filtered	Filtered	Filtered			libDIA-6xlib	P55854;P61956;Q6EEV6	P55854;P61956;Q6EEV6	SUMO3;SUMO2;SUMO4	Small ubiquitin-related modifier 3;Small ubiquitin-related modifier 2;Small ubiquitin-related modifier 4	P55854;P61956;Q6EEV6	SUMO3_HUMAN;SUMO2_HUMAN;SUMO4_HUMAN	8056.11	8026.53	7255.22			dirDIA	Q9Y617	Q9Y617	PSAT1	Phosphoserine aminotransferase	Q9Y617	SERC_HUMAN	2516.43	1735.26	1217.55
libDIA-22xlib	P61457	P61457	PCBD1	Pterin-4-alpha-carbinolamine dehydratase	P61457	PHS_HUMAN	Filtered	Filtered	2523.41			libDIA-6xlib	P55884	P55884	EIF3B	Eukaryotic translation initiation factor 3 subunit B	P55884	EIF3B_HUMAN	2931.4	3960.33	4210.37			dirDIA	Q9Y678	Q9Y678	COPG1	Coatomer subunit gamma-1	Q9Y678	COPG1_HUMAN	0.855927	1038.23	1002.32
libDIA-22xlib	P61604	P61604	HSPE1	10 kDa heat shock protein, mitochondrial	P61604	CH10_HUMAN	30992.1	44343.9	36485.3			libDIA-6xlib	P55957	P55957	BID	BH3-interacting domain death agonist	P55957	BID_HUMAN	478.156	1136.41	1056.47			dirDIA	Q9Y696	Q9Y696	CLIC4	Chloride intracellular channel protein 4	Q9Y696	CLIC4_HUMAN	709.838	177.644	491.998
libDIA-22xlib	P61619	P61619	SEC61A1	Protein transport protein Sec61 subunit alpha isoform 1	P61619	S61A1_HUMAN	Filtered	Filtered	Filtered			libDIA-6xlib	P56182	P56182	RRP1	Ribosomal RNA processing protein 1 homolog A	P56182	RRP1_HUMAN	Filtered	Filtered	Filtered			dirDIA	Q9Y6N5	Q9Y6N5	SQRDL	Sulfide:quinone oxidoreductase, mitochondrial	Q9Y6N5	SQRD_HUMAN	727.592	1419.65	1519.37
libDIA-22xlib	P61758	P61758	VBP1	Prefoldin subunit 3	P61758	PFD3_HUMAN	Filtered	Filtered	Filtered			libDIA-6xlib	P56192	P56192	MARS	Methionine--tRNA ligase, cytoplasmic	P56192	SYMC_HUMAN	473.648	1230.86	Filtered
libDIA-22xlib	P61803	P61803	DAD1	Dolichyl-diphosphooligosaccharide--protein glycosyltransferase subunit DAD1	P61803	DAD1_HUMAN	Filtered	Filtered	1730.05			libDIA-6xlib	P56385	P56385	ATP5I	ATP synthase subunit e, mitochondrial	P56385	ATP5I_HUMAN	0.613483	469.034	Filtered
libDIA-22xlib	P61923	P61923	COPZ1	Coatomer subunit zeta-1	P61923	COPZ1_HUMAN	Filtered	2120.38	3335.59			libDIA-6xlib	P56537	P56537	EIF6	Eukaryotic translation initiation factor 6	P56537	IF6_HUMAN	9568.08	9311.52	7870.15
libDIA-22xlib	P61960	P61960	UFM1	Ubiquitin-fold modifier 1	P61960	UFM1_HUMAN	Filtered	Filtered	Filtered			libDIA-6xlib	P56962	P56962	STX17	Syntaxin-17	P56962	STX17_HUMAN	Filtered	Filtered	Filtered
libDIA-22xlib	P61970	P61970	NUTF2	Nuclear transport factor 2	P61970	NTF2_HUMAN	1087.16	Filtered	Filtered			libDIA-6xlib	P57088	P57088	TMEM33	Transmembrane protein 33	P57088	TMM33_HUMAN	Filtered	Filtered	Filtered
libDIA-22xlib	P61978	P61978	HNRNPK	Heterogeneous nuclear ribonucleoprotein K	P61978	HNRPK_HUMAN	10685.3	15721.7	12689.4			libDIA-6xlib	P57105	P57105	SYNJ2BP	Synaptojanin-2-binding protein	P57105	SYJ2B_HUMAN	Filtered	Filtered	Filtered
libDIA-22xlib	P61981	P61981	YWHAG	14-3-3 protein gamma	P61981	1433G_HUMAN	5031.21	4594.99	3587.8			libDIA-6xlib	P57764	P57764	GSDMD	Gasdermin-D	P57764	GSDMD_HUMAN	Filtered	Filtered	Filtered
libDIA-22xlib	P62081	P62081	RPS7	40S ribosomal protein S7	P62081	RS7_HUMAN	5493.25	4340.35	6710.97			libDIA-6xlib	P58107	P58107	EPPK1	Epiplakin	P58107	EPIPL_HUMAN	0.876274	388.005	230.28
libDIA-22xlib	P62136	P62136	PPP1CA	Serine/threonine-protein phosphatase PP1-alpha catalytic subunit	P62136	PP1A_HUMAN	2908.39	4178	1125.12			libDIA-6xlib	P59998	P59998	ARPC4	Actin-related protein 2/3 complex subunit 4	P59998	ARPC4_HUMAN	8377.27	10820.8	6983.28
libDIA-22xlib	P62158	P62158	CALM1	Calmodulin	P62158	CALM_HUMAN	35195.9	40697.9	33920.3			libDIA-6xlib	P60174	P60174	TPI1	Triosephosphate isomerase	P60174	TPIS_HUMAN	4054.93	1747.59	2726.81
libDIA-22xlib	P62191	P62191	PSMC1	26S protease regulatory subunit 4	P62191	PRS4_HUMAN	1115.17	2358.43	4014.1			libDIA-6xlib	P60228	P60228	EIF3E	Eukaryotic translation initiation factor 3 subunit E	P60228	EIF3E_HUMAN	Filtered	Filtered	2637.32
libDIA-22xlib	P62195	P62195	PSMC5	26S protease regulatory subunit 8	P62195	PRS8_HUMAN	1319.76	2143.99	3161.66			libDIA-6xlib	P60468	P60468	SEC61B	Protein transport protein Sec61 subunit beta	P60468	SC61B_HUMAN	Filtered	Filtered	Filtered
libDIA-22xlib	P62241	P62241	RPS8	40S ribosomal protein S8	P62241	RS8_HUMAN	8728.38	11277	12889.8			libDIA-6xlib	P60510	P60510	PPP4C	Serine/threonine-protein phosphatase 4 catalytic subunit	P60510	PP4C_HUMAN	342.862	653.569	Filtered
libDIA-22xlib	P62244	P62244	RPS15A	40S ribosomal protein S15a	P62244	RS15A_HUMAN	5037.57	3187.59	4945.03			libDIA-6xlib	P60660	P60660	MYL6	Myosin light polypeptide 6	P60660	MYL6_HUMAN	12789.2	17696.1	15658
libDIA-22xlib	P62249	P62249	RPS16	40S ribosomal protein S16	P62249	RS16_HUMAN	10617.4	13039.7	17190.3			libDIA-6xlib	P60709;P63261	P60709;P63261	ACTB;ACTG1	Actin, cytoplasmic 1;Actin, cytoplasmic 2	P60709;P63261	ACTB_HUMAN;ACTG_HUMAN	462176	472650	469845
libDIA-22xlib	P62258	P62258	YWHAE	14-3-3 protein epsilon	P62258	1433E_HUMAN	53311.4	54334	53315.3			libDIA-6xlib	P60842	P60842	EIF4A1	Eukaryotic initiation factor 4A-I	P60842	IF4A1_HUMAN	30557.7	49035.5	41803.2
libDIA-22xlib	P62263	P62263	RPS14	40S ribosomal protein S14	P62263	RS14_HUMAN	30672.8	12711.1	12179.3			libDIA-6xlib	P60866	P60866	RPS20	40S ribosomal protein S20	P60866	RS20_HUMAN	4021.3	5416.05	4624.41
libDIA-22xlib	P62266	P62266	RPS23	40S ribosomal protein S23	P62266	RS23_HUMAN	1800.36	2525.69	4217.58			libDIA-6xlib	P60900	P60900	PSMA6	Proteasome subunit alpha type-6	P60900	PSA6_HUMAN	4736.6	3036.41	2594.85
libDIA-22xlib	P62269	P62269	RPS18	40S ribosomal protein S18	P62269	RS18_HUMAN	2398.15	2623.95	2853.75			libDIA-6xlib	P60903	P60903	S100A10	Protein S100-A10	P60903	S10AA_HUMAN	28132	36886.4	52209.4
libDIA-22xlib	P62277	P62277	RPS13	40S ribosomal protein S13	P62277	RS13_HUMAN	16079.6	19045.1	19105.4			libDIA-6xlib	P60953	P60953	CDC42	Cell division control protein 42 homolog	P60953	CDC42_HUMAN	Filtered	Filtered	1549.91
libDIA-22xlib	P62280	P62280	RPS11	40S ribosomal protein S11	P62280	RS11_HUMAN	1738.81	2708.25	6598.65			libDIA-6xlib	P60981	P60981	DSTN	Destrin	P60981	DEST_HUMAN	2266.13	3044.42	3497.04
libDIA-22xlib	P62304	P62304	SNRPE	Small nuclear ribonucleoprotein E	P62304	RUXE_HUMAN	4686.38	4982.51	9918.31			libDIA-6xlib	P60983	P60983	GMFB	Glia maturation factor beta	P60983	GMFB_HUMAN	Filtered	Filtered	Filtered
libDIA-22xlib	P62310	P62310	LSM3	U6 snRNA-associated Sm-like protein LSm3	P62310	LSM3_HUMAN	2311.01	2758.16	3787.35			libDIA-6xlib	P61006;Q92930	P61006;Q92930	RAB8A;RAB8B	Ras-related protein Rab-8A;Ras-related protein Rab-8B	P61006;Q92930	RAB8A_HUMAN;RAB8B_HUMAN	Filtered	Filtered	Filtered
libDIA-22xlib	P62312	P62312	LSM6	U6 snRNA-associated Sm-like protein LSm6	P62312	LSM6_HUMAN	Filtered	Filtered	Filtered			libDIA-6xlib	P61009	P61009	SPCS3	Signal peptidase complex subunit 3	P61009	SPCS3_HUMAN	Filtered	889.291	Filtered
libDIA-22xlib	P62314	P62314	SNRPD1	Small nuclear ribonucleoprotein Sm D1	P62314	SMD1_HUMAN	1114.05	1944.46	708.577			libDIA-6xlib	P61019	P61019	RAB2A	Ras-related protein Rab-2A	P61019	RAB2A_HUMAN	Filtered	Filtered	Filtered
libDIA-22xlib	P62316	P62316	SNRPD2	Small nuclear ribonucleoprotein Sm D2	P62316	SMD2_HUMAN	6895.62	8536.67	6495.72			libDIA-6xlib	P61024	P61024	CKS1B	Cyclin-dependent kinases regulatory subunit 1	P61024	CKS1_HUMAN	Filtered	820.773	Filtered
libDIA-22xlib	P62318	P62318	SNRPD3	Small nuclear ribonucleoprotein Sm D3	P62318	SMD3_HUMAN	3572.49	5509.99	5093.59			libDIA-6xlib	P61026	P61026	RAB10	Ras-related protein Rab-10	P61026	RAB10_HUMAN	Filtered	Filtered	Filtered
libDIA-22xlib	P62333	P62333	PSMC6	26S protease regulatory subunit 10B	P62333	PRS10_HUMAN	Filtered	964.038	1115.11			libDIA-6xlib	P61086	P61086	UBE2K	Ubiquitin-conjugating enzyme E2 K	P61086	UBE2K_HUMAN	1671.65	2523.73	3586.62
libDIA-22xlib	P62424	P62424	RPL7A	60S ribosomal protein L7a	P62424	RL7A_HUMAN	7648.41	10221.6	11375.1			libDIA-6xlib	P61088	P61088	UBE2N	Ubiquitin-conjugating enzyme E2 N	P61088	UBE2N_HUMAN	9570.04	11262.4	13897.2
libDIA-22xlib	P62495	P62495	ETF1	Eukaryotic peptide chain release factor subunit 1	P62495	ERF1_HUMAN	1895.82	1790.24	1143.05			libDIA-6xlib	P61106	P61106	RAB14	Ras-related protein Rab-14	P61106	RAB14_HUMAN	Filtered	268.631	Filtered
libDIA-22xlib	P62701	P62701	RPS4X	40S ribosomal protein S4, X isoform	P62701	RS4X_HUMAN	5984.61	6343.8	8877.65			libDIA-6xlib	P61158	P61158	ACTR3	Actin-related protein 3	P61158	ARP3_HUMAN	1599.52	Filtered	4823.44
libDIA-22xlib	P62714;P67775	P62714;P67775	PPP2CB;PPP2CA	Serine/threonine-protein phosphatase 2A catalytic subunit beta isoform;Serine/threonine-protein phosphatase 2A catalytic subunit alpha isoform	P62714;P67775	PP2AB_HUMAN;PP2AA_HUMAN	3800.69	3663.47	8999.13			libDIA-6xlib	P61160	P61160	ACTR2	Actin-related protein 2	P61160	ARP2_HUMAN	3368.14	3378.09	6062.62
libDIA-22xlib	P62736	P62736	ACTA2	Actin, aortic smooth muscle	P62736	ACTA_HUMAN	1.0134	164289	223241			libDIA-6xlib	P61204;P84077	P61204;P84077	ARF3;ARF1	ADP-ribosylation factor 3;ADP-ribosylation factor 1	P61204;P84077	ARF3_HUMAN;ARF1_HUMAN	13880.5	14998.7	10508.2
libDIA-22xlib	P62750	P62750	RPL23A	60S ribosomal protein L23a	P62750	RL23A_HUMAN	5980.55	7684.85	7740.87			libDIA-6xlib	P61221	P61221	ABCE1	ATP-binding cassette sub-family E member 1	P61221	ABCE1_HUMAN	1864.54	2211.82	1811.98
libDIA-22xlib	P62753	P62753	RPS6	40S ribosomal protein S6	P62753	RS6_HUMAN	27786.6	21096.3	43241.4			libDIA-6xlib	P61224;P62834	P61224;P62834	RAP1B;RAP1A	Ras-related protein Rap-1b;Ras-related protein Rap-1A	P61224;P62834	RAP1B_HUMAN;RAP1A_HUMAN	4505.59	5188.25	2651.86
libDIA-22xlib	P62805	P62805	HIST1H4A	Histone H4	P62805	H4_HUMAN	238510	145905	128593			libDIA-6xlib	P61247	P61247	RPS3A	40S ribosomal protein S3a	P61247	RS3A_HUMAN	2098.56	2868.09	2120.84
libDIA-22xlib	P62820	P62820	RAB1A	Ras-related protein Rab-1A	P62820	RAB1A_HUMAN	2062.91	3977.89	1485.01			libDIA-6xlib	P61254;Q9UNX3	P61254;Q9UNX3	RPL26;RPL26L1	60S ribosomal protein L26;60S ribosomal protein L26-like 1	P61254;Q9UNX3	RL26_HUMAN;RL26L_HUMAN	15342.1	20946.8	19577.1
libDIA-22xlib	P62826	P62826	RAN	GTP-binding nuclear protein Ran	P62826	RAN_HUMAN	27133.5	30710.2	17098			libDIA-6xlib	P61289	P61289	PSME3	Proteasome activator complex subunit 3	P61289	PSME3_HUMAN	Filtered	Filtered	2376.13
libDIA-22xlib	P62829	P62829	RPL23	60S ribosomal protein L23	P62829	RL23_HUMAN	2154.82	3475.23	3624.63			libDIA-6xlib	P61313	P61313	RPL15	60S ribosomal protein L15	P61313	RL15_HUMAN	3377.22	5099.13	5173.14
libDIA-22xlib	P62847	P62847	RPS24	40S ribosomal protein S24	P62847	RS24_HUMAN	2135.13	Filtered	2939.75			libDIA-6xlib	P61326;Q96A72	P61326;Q96A72	MAGOH;MAGOHB	Protein mago nashi homolog;Protein mago nashi homolog 2	P61326;Q96A72	MGN_HUMAN;MGN2_HUMAN	1954.24	1720.86	1895.07
libDIA-22xlib	P62851	P62851	RPS25	40S ribosomal protein S25	P62851	RS25_HUMAN	12563.3	14749.8	18327.9			libDIA-6xlib	P61353	P61353	RPL27	60S ribosomal protein L27	P61353	RL27_HUMAN	11281.4	11823	11494.8
libDIA-22xlib	P62854;Q5JNZ5	P62854;Q5JNZ5	RPS26;RPS26P11	40S ribosomal protein S26;Putative 40S ribosomal protein S26-like 1	P62854;Q5JNZ5	RS26_HUMAN;RS26L_HUMAN	9291.15	12412.4	10086.9			libDIA-6xlib	P61421	P61421	ATP6V0D1	V-type proton ATPase subunit d 1	P61421	VA0D1_HUMAN	Filtered	Filtered	Filtered
libDIA-22xlib	P62857	P62857	RPS28	40S ribosomal protein S28	P62857	RS28_HUMAN	7825.58	9640.23	12371.2			libDIA-6xlib	P61604	P61604	HSPE1	10 kDa heat shock protein, mitochondrial	P61604	CH10_HUMAN	30984.4	44343.9	36323.9
libDIA-22xlib	P62861	P62861	FAU	40S ribosomal protein S30	P62861	RS30_HUMAN	13684	19840.7	21170.3			libDIA-6xlib	P61619	P61619	SEC61A1	Protein transport protein Sec61 subunit alpha isoform 1	P61619	S61A1_HUMAN	Filtered	168.589	Filtered
libDIA-22xlib	P62875	P62875	POLR2L	DNA-directed RNA polymerases I, II, and III subunit RPABC5	P62875	RPAB5_HUMAN	Filtered	Filtered	Filtered			libDIA-6xlib	P61803	P61803	DAD1	Dolichyl-diphosphooligosaccharide--protein glycosyltransferase subunit DAD1	P61803	DAD1_HUMAN	Filtered	Filtered	2138.42
libDIA-22xlib	P62888	P62888	RPL30	60S ribosomal protein L30	P62888	RL30_HUMAN	Filtered	884.994	687.508			libDIA-6xlib	P61923	P61923	COPZ1	Coatomer subunit zeta-1	P61923	COPZ1_HUMAN	1490	2120.34	3722.79
libDIA-22xlib	P62899	P62899	RPL31	60S ribosomal protein L31	P62899	RL31_HUMAN	12688.8	8067.35	9861.8			libDIA-6xlib	P61960	P61960	UFM1	Ubiquitin-fold modifier 1	P61960	UFM1_HUMAN	Filtered	Filtered	Filtered
libDIA-22xlib	P62906	P62906	RPL10A	60S ribosomal protein L10a	P62906	RL10A_HUMAN	9027.84	11122	10873.1			libDIA-6xlib	P61978	P61978	HNRNPK	Heterogeneous nuclear ribonucleoprotein K	P61978	HNRPK_HUMAN	10494.5	16940.5	13697.2
libDIA-22xlib	P62910	P62910	RPL32	60S ribosomal protein L32	P62910	RL32_HUMAN	Filtered	Filtered	Filtered			libDIA-6xlib	P61981	P61981	YWHAG	14-3-3 protein gamma	P61981	1433G_HUMAN	5417.28	6505.22	6537.27
libDIA-22xlib	P62913	P62913	RPL11	60S ribosomal protein L11	P62913	RL11_HUMAN	9470.85	12641.2	13658.1			libDIA-6xlib	P62081	P62081	RPS7	40S ribosomal protein S7	P62081	RS7_HUMAN	5493.22	5813.53	7822.05
libDIA-22xlib	P62917	P62917	RPL8	60S ribosomal protein L8	P62917	RL8_HUMAN	2612.79	3878.18	2249.77			libDIA-6xlib	P62136	P62136	PPP1CA	Serine/threonine-protein phosphatase PP1-alpha catalytic subunit	P62136	PP1A_HUMAN	2031.28	2633.87	1999.18
libDIA-22xlib	P62937	P62937	PPIA	Peptidyl-prolyl cis-trans isomerase A	P62937	PPIA_HUMAN	98420.4	119275	57797.5			libDIA-6xlib	P62140	P62140	PPP1CB	Serine/threonine-protein phosphatase PP1-beta catalytic subunit	P62140	PP1B_HUMAN	Filtered	Filtered	Filtered
libDIA-22xlib	P62942	P62942	FKBP1A	Peptidyl-prolyl cis-trans isomerase FKBP1A	P62942	FKB1A_HUMAN	16637	21881.8	16846.4			libDIA-6xlib	P62158	P62158	CALM1	Calmodulin	P62158	CALM_HUMAN	37203.4	42815.2	35591.3
libDIA-22xlib	P63000	P63000	RAC1	Ras-related C3 botulinum toxin substrate 1	P63000	RAC1_HUMAN	9930.1	12018.7	10354.9			libDIA-6xlib	P62191	P62191	PSMC1	26S protease regulatory subunit 4	P62191	PRS4_HUMAN	Filtered	Filtered	0.589874
libDIA-22xlib	P63010	P63010	AP2B1	AP-2 complex subunit beta	P63010	AP2B1_HUMAN	Filtered	199.948	Filtered			libDIA-6xlib	P62195	P62195	PSMC5	26S protease regulatory subunit 8	P62195	PRS8_HUMAN	356.755	1396.18	2731.5
libDIA-22xlib	P63104	P63104	YWHAZ	14-3-3 protein zeta/delta	P63104	1433Z_HUMAN	16743.5	25950.4	26322.1			libDIA-6xlib	P62241	P62241	RPS8	40S ribosomal protein S8	P62241	RS8_HUMAN	8728.39	11277	12847.5
libDIA-22xlib	P63165	P63165	SUMO1	Small ubiquitin-related modifier 1	P63165	SUMO1_HUMAN	1473.68	1618.55	1170.13			libDIA-6xlib	P62244	P62244	RPS15A	40S ribosomal protein S15a	P62244	RS15A_HUMAN	2427.31	5801.94	4091.04
libDIA-22xlib	P63172	P63172	DYNLT1	Dynein light chain Tctex-type 1	P63172	DYLT1_HUMAN	Filtered	Filtered	Filtered			libDIA-6xlib	P62249	P62249	RPS16	40S ribosomal protein S16	P62249	RS16_HUMAN	10584.3	13039.7	17133.1
libDIA-22xlib	P63173	P63173	RPL38	60S ribosomal protein L38	P63173	RL38_HUMAN	4715.48	7074.46	4188.43			libDIA-6xlib	P62258	P62258	YWHAE	14-3-3 protein epsilon	P62258	1433E_HUMAN	58167.2	58979.4	57166.9
libDIA-22xlib	P63208	P63208	SKP1	S-phase kinase-associated protein 1	P63208	SKP1_HUMAN	4178.73	5820.79	6201.36			libDIA-6xlib	P62263	P62263	RPS14	40S ribosomal protein S14	P62263	RS14_HUMAN	15748.2	18419.9	12279.1
libDIA-22xlib	P63220	P63220	RPS21	40S ribosomal protein S21	P63220	RS21_HUMAN	3588.69	3798.87	3453.18			libDIA-6xlib	P62266	P62266	RPS23	40S ribosomal protein S23	P62266	RS23_HUMAN	1702.88	2418.39	3964.69
libDIA-22xlib	P63241	P63241	EIF5A	Eukaryotic translation initiation factor 5A-1	P63241	IF5A1_HUMAN	6149.01	9634.86	15550.2			libDIA-6xlib	P62269	P62269	RPS18	40S ribosomal protein S18	P62269	RS18_HUMAN	2520.83	3180.08	3278.87
libDIA-22xlib	P63244	P63244	GNB2L1	Guanine nucleotide-binding protein subunit beta-2-like 1	P63244	GBLP_HUMAN	10419.1	10815.1	10377.5			libDIA-6xlib	P62277	P62277	RPS13	40S ribosomal protein S13	P62277	RS13_HUMAN	14490.9	18221.3	16390.2
libDIA-22xlib	P63279	P63279	UBE2I	SUMO-conjugating enzyme UBC9	P63279	UBC9_HUMAN	291.387	827.883	2089.03			libDIA-6xlib	P62280	P62280	RPS11	40S ribosomal protein S11	P62280	RS11_HUMAN	3476.76	5415.93	6598.62
libDIA-22xlib	P67809	P67809	YBX1	Nuclease-sensitive element-binding protein 1	P67809	YBOX1_HUMAN	Filtered	Filtered	Filtered			libDIA-6xlib	P62304	P62304	SNRPE	Small nuclear ribonucleoprotein E	P62304	RUXE_HUMAN	4202.27	4859.2	9702.07
libDIA-22xlib	P67812	P67812	SEC11A	Signal peptidase complex catalytic subunit SEC11A	P67812	SC11A_HUMAN	Filtered	Filtered	Filtered			libDIA-6xlib	P62310	P62310	LSM3	U6 snRNA-associated Sm-like protein LSm3	P62310	LSM3_HUMAN	2601.11	2579.86	3515.16
libDIA-22xlib	P67936	P67936	TPM4	Tropomyosin alpha-4 chain	P67936	TPM4_HUMAN	35764.1	60071.1	57029.1			libDIA-6xlib	P62314	P62314	SNRPD1	Small nuclear ribonucleoprotein Sm D1	P62314	SMD1_HUMAN	1174.82	2543.32	1064.88
libDIA-22xlib	P68104;Q5VTE0	P68104;Q5VTE0	EEF1A1;EEF1A1P5	Elongation factor 1-alpha 1;Putative elongation factor 1-alpha-like 3	P68104;Q5VTE0	EF1A1_HUMAN;EF1A3_HUMAN	207265	255682	284805			libDIA-6xlib	P62316	P62316	SNRPD2	Small nuclear ribonucleoprotein Sm D2	P62316	SMD2_HUMAN	7172.38	8517.88	6352.63
libDIA-22xlib	P68363;Q9BQE3	P68363;Q9BQE3	TUBA1B;TUBA1C	Tubulin alpha-1B chain;Tubulin alpha-1C chain	P68363;Q9BQE3	TBA1B_HUMAN;TBA1C_HUMAN	55186.4	50337.3	60163.8			libDIA-6xlib	P62318	P62318	SNRPD3	Small nuclear ribonucleoprotein Sm D3	P62318	SMD3_HUMAN	3934.04	5942.15	7102.14
libDIA-22xlib	P68366	P68366	TUBA4A	Tubulin alpha-4A chain	P68366	TBA4A_HUMAN	9864.12	9938.45	17676.2			libDIA-6xlib	P62330	P62330	ARF6	ADP-ribosylation factor 6	P62330	ARF6_HUMAN	Filtered	Filtered	Filtered
libDIA-22xlib	P68371	P68371	TUBB4B	Tubulin beta-4B chain	P68371	TBB4B_HUMAN	28701.5	36225.2	35472.8			libDIA-6xlib	P62333	P62333	PSMC6	26S protease regulatory subunit 10B	P62333	PRS10_HUMAN	477.582	850.394	966.005
libDIA-22xlib	P68400	P68400	CSNK2A1	Casein kinase II subunit alpha	P68400	CSK21_HUMAN	0.464973	Filtered	418.759			libDIA-6xlib	P62424	P62424	RPL7A	60S ribosomal protein L7a	P62424	RL7A_HUMAN	7979.08	10595.8	11546.1
libDIA-22xlib	P68402	P68402	PAFAH1B2	Platelet-activating factor acetylhydrolase IB subunit beta	P68402	PA1B2_HUMAN	Filtered	3294.52	6323.43			libDIA-6xlib	P62495	P62495	ETF1	Eukaryotic peptide chain release factor subunit 1	P62495	ERF1_HUMAN	1895.98	1668.97	2133.99
libDIA-22xlib	P68431;P84243;Q16695;Q6NXT2;Q71DI3	P68431;P84243;Q16695;Q6NXT2;Q71DI3	HIST1H3A;H3F3A;HIST3H3;H3F3C;HIST2H3A	Histone H3.1;Histone H3.3;Histone H3.1t;Histone H3.3C;Histone H3.2	P68431;P84243;Q16695;Q6NXT2;Q71DI3	H31_HUMAN;H33_HUMAN;H31T_HUMAN;H3C_HUMAN;H32_HUMAN	123203	78621.6	62255.3			libDIA-6xlib	P62701	P62701	RPS4X	40S ribosomal protein S4, X isoform	P62701	RS4X_HUMAN	5984.65	6273.15	8873.74
libDIA-22xlib	P69849;Q15155;Q5JPE7	P69849;Q15155;Q5JPE7	NOMO3;NOMO1;NOMO2	Nodal modulator 3;Nodal modulator 1;Nodal modulator 2	P69849;Q15155;Q5JPE7	NOMO3_HUMAN;NOMO1_HUMAN;NOMO2_HUMAN	Filtered	Filtered	Filtered			libDIA-6xlib	P62714;P67775	P62714;P67775	PPP2CB;PPP2CA	Serine/threonine-protein phosphatase 2A catalytic subunit beta isoform;Serine/threonine-protein phosphatase 2A catalytic subunit alpha isoform	P62714;P67775	PP2AB_HUMAN;PP2AA_HUMAN	3800.72	Filtered	9327.3
libDIA-22xlib	P69905	P69905	HBA1	Hemoglobin subunit alpha	P69905	HBA_HUMAN	Filtered	Filtered	Filtered			libDIA-6xlib	P62736;P63267	P62736;P63267	ACTA2;ACTG2	Actin, aortic smooth muscle;Actin, gamma-enteric smooth muscle	P62736;P63267	ACTA_HUMAN;ACTH_HUMAN	1.0134	408.942	5124.54
libDIA-22xlib	P78344	P78344	EIF4G2	Eukaryotic translation initiation factor 4 gamma 2	P78344	IF4G2_HUMAN	Filtered	Filtered	Filtered			libDIA-6xlib	P62750	P62750	RPL23A	60S ribosomal protein L23a	P62750	RL23A_HUMAN	6052.38	8118.41	8167.32
libDIA-22xlib	P78347	P78347	GTF2I	General transcription factor II-I	P78347	GTF2I_HUMAN	341.007	407.234	Filtered			libDIA-6xlib	P62753	P62753	RPS6	40S ribosomal protein S6	P62753	RS6_HUMAN	12238.9	17769	38026.1
libDIA-22xlib	P78371	P78371	CCT2	T-complex protein 1 subunit beta	P78371	TCPB_HUMAN	1965.09	2293.17	2697.76			libDIA-6xlib	P62805	P62805	HIST1H4A	Histone H4	P62805	H4_HUMAN	243606	156280	137263
libDIA-22xlib	P78385;P78386	P78385;P78386	KRT83;KRT85	Keratin, type II cuticular Hb3;Keratin, type II cuticular Hb5	P78385;P78386	KRT83_HUMAN;KRT85_HUMAN	8055.49	Filtered	15823.6			libDIA-6xlib	P62820	P62820	RAB1A	Ras-related protein Rab-1A	P62820	RAB1A_HUMAN	2062.88	3977.86	1484.94
libDIA-22xlib	P78395	P78395	PRAME	Melanoma antigen preferentially expressed in tumors	P78395	PRAME_HUMAN	63840.1	69767.7	61004.4			libDIA-6xlib	P62826	P62826	RAN	GTP-binding nuclear protein Ran	P62826	RAN_HUMAN	26927.3	30678.3	17637.3
libDIA-22xlib	P78417	P78417	GSTO1	Glutathione S-transferase omega-1	P78417	GSTO1_HUMAN	3106.31	2136.48	2049.14			libDIA-6xlib	P62829	P62829	RPL23	60S ribosomal protein L23	P62829	RL23_HUMAN	3528.33	5207.15	5591.98
libDIA-22xlib	P78527	P78527	PRKDC	DNA-dependent protein kinase catalytic subunit	P78527	PRKDC_HUMAN	1607.68	1963.97	3812.62			libDIA-6xlib	P62841	P62841	RPS15	40S ribosomal protein S15	P62841	RS15_HUMAN	Filtered	Filtered	Filtered
libDIA-22xlib	P80188	P80188	LCN2	Neutrophil gelatinase-associated lipocalin	P80188	NGAL_HUMAN	648.867	795.57	Filtered			libDIA-6xlib	P62847	P62847	RPS24	40S ribosomal protein S24	P62847	RS24_HUMAN	1790.75	2365.78	2989.52
libDIA-22xlib	P81605	P81605	DCD	Dermcidin	P81605	DCD_HUMAN	25587.5	22871.3	19037.6			libDIA-6xlib	P62851	P62851	RPS25	40S ribosomal protein S25	P62851	RS25_HUMAN	12612.3	14749.8	18328
libDIA-22xlib	P82650	P82650	MRPS22	28S ribosomal protein S22, mitochondrial	P82650	RT22_HUMAN	Filtered	Filtered	Filtered			libDIA-6xlib	P62854;Q5JNZ5	P62854;Q5JNZ5	RPS26;RPS26P11	40S ribosomal protein S26;Putative 40S ribosomal protein S26-like 1	P62854;Q5JNZ5	RS26_HUMAN;RS26L_HUMAN	9291.18	12412.4	10087
libDIA-22xlib	P82979	P82979	SARNP	SAP domain-containing ribonucleoprotein	P82979	SARNP_HUMAN	420.961	350.968	543.582			libDIA-6xlib	P62857	P62857	RPS28	40S ribosomal protein S28	P62857	RS28_HUMAN	7393.65	9640.23	12371.1
libDIA-22xlib	P83731	P83731	RPL24	60S ribosomal protein L24	P83731	RL24_HUMAN	5349.61	5851.1	5386.6			libDIA-6xlib	P62861	P62861	FAU	40S ribosomal protein S30	P62861	RS30_HUMAN	13684	19840.7	21170.3
libDIA-22xlib	P83881;Q969Q0	P83881;Q969Q0	RPL36A;RPL36AL	60S ribosomal protein L36a;60S ribosomal protein L36a-like	P83881;Q969Q0	RL36A_HUMAN;RL36L_HUMAN	Filtered	Filtered	Filtered			libDIA-6xlib	P62875	P62875	POLR2L	DNA-directed RNA polymerases I, II, and III subunit RPABC5	P62875	RPAB5_HUMAN	Filtered	Filtered	Filtered
libDIA-22xlib	P84103	P84103	SRSF3	Serine/arginine-rich splicing factor 3	P84103	SRSF3_HUMAN	11076.5	15418.8	18156.2			libDIA-6xlib	P62888	P62888	RPL30	60S ribosomal protein L30	P62888	RL30_HUMAN	Filtered	265.137	431.041
libDIA-22xlib	P99999	P99999	CYCS	Cytochrome c	P99999	CYC_HUMAN	Filtered	0.489613	Filtered			libDIA-6xlib	P62899	P62899	RPL31	60S ribosomal protein L31	P62899	RL31_HUMAN	6344.83	8067.35	9860.89
libDIA-22xlib	Q00059	Q00059	TFAM	Transcription factor A, mitochondrial	Q00059	TFAM_HUMAN	Filtered	Filtered	Filtered			libDIA-6xlib	P62906	P62906	RPL10A	60S ribosomal protein L10a	P62906	RL10A_HUMAN	10393.4	13174.8	12474
libDIA-22xlib	Q00325	Q00325	SLC25A3	Phosphate carrier protein, mitochondrial	Q00325	MPCP_HUMAN	Filtered	Filtered	Filtered			libDIA-6xlib	P62910	P62910	RPL32	60S ribosomal protein L32	P62910	RL32_HUMAN	4896.78	6570.32	686.631
libDIA-22xlib	Q00341	Q00341	HDLBP	Vigilin	Q00341	VIGLN_HUMAN	271.787	623.401	962.525			libDIA-6xlib	P62913	P62913	RPL11	60S ribosomal protein L11	P62913	RL11_HUMAN	8147.62	12641.3	13658.1
libDIA-22xlib	Q00610	Q00610	CLTC	Clathrin heavy chain 1	Q00610	CLH1_HUMAN	2457.93	3908.38	4781.23			libDIA-6xlib	P62917	P62917	RPL8	60S ribosomal protein L8	P62917	RL8_HUMAN	2612.56	3457.15	2300.1
libDIA-22xlib	Q00765	Q00765	REEP5	Receptor expression-enhancing protein 5	Q00765	REEP5_HUMAN	Filtered	Filtered	Filtered			libDIA-6xlib	P62937	P62937	PPIA	Peptidyl-prolyl cis-trans isomerase A	P62937	PPIA_HUMAN	98420.4	119275	57698.6
libDIA-22xlib	Q00796	Q00796	SORD	Sorbitol dehydrogenase	Q00796	DHSO_HUMAN	Filtered	Filtered	Filtered			libDIA-6xlib	P62942	P62942	FKBP1A	Peptidyl-prolyl cis-trans isomerase FKBP1A	P62942	FKB1A_HUMAN	16637	21881.8	16846.3
libDIA-22xlib	Q00839	Q00839	HNRNPU	Heterogeneous nuclear ribonucleoprotein U	Q00839	HNRPU_HUMAN	5997.34	6313.03	6885.86			libDIA-6xlib	P62993	P62993	GRB2	Growth factor receptor-bound protein 2	P62993	GRB2_HUMAN	Filtered	Filtered	Filtered
libDIA-22xlib	Q01082	Q01082	SPTBN1	Spectrin beta chain, non-erythrocytic 1	Q01082	SPTB2_HUMAN	2040.06	2099.07	2400.36			libDIA-6xlib	P62995	P62995	TRA2B	Transformer-2 protein homolog beta	P62995	TRA2B_HUMAN	Filtered	189.126	182.265
libDIA-22xlib	Q01085	Q01085	TIAL1	Nucleolysin TIAR	Q01085	TIAR_HUMAN	Filtered	Filtered	Filtered			libDIA-6xlib	P63000	P63000	RAC1	Ras-related C3 botulinum toxin substrate 1	P63000	RAC1_HUMAN	Filtered	Filtered	Filtered
libDIA-22xlib	Q01105	Q01105	SET	Protein SET	Q01105	SET_HUMAN	8545.88	14289.2	15639.7			libDIA-6xlib	P63010	P63010	AP2B1	AP-2 complex subunit beta	P63010	AP2B1_HUMAN	Filtered	Filtered	Filtered
libDIA-22xlib	Q01130;Q9BRL6	Q01130;Q9BRL6	SRSF2;SRSF8	Serine/arginine-rich splicing factor 2;Serine/arginine-rich splicing factor 8	Q01130;Q9BRL6	SRSF2_HUMAN;SRSF8_HUMAN	7141.11	7794.54	Filtered			libDIA-6xlib	P63092;Q5JWF2	P63092;Q5JWF2	GNAS	Guanine nucleotide-binding protein G(s) subunit alpha isoforms short;Guanine nucleotide-binding protein G(s) subunit alpha isoforms XLas	P63092;Q5JWF2	GNAS2_HUMAN;GNAS1_HUMAN	Filtered	Filtered	Filtered
libDIA-22xlib	Q01469	Q01469	FABP5	Fatty acid-binding protein, epidermal	Q01469	FABP5_HUMAN	7417.39	7432.37	11110.2			libDIA-6xlib	P63104	P63104	YWHAZ	14-3-3 protein zeta/delta	P63104	1433Z_HUMAN	16757.7	26619.9	26322.1
libDIA-22xlib	Q01518	Q01518	CAP1	Adenylyl cyclase-associated protein 1	Q01518	CAP1_HUMAN	7247.02	10500.3	14620.9			libDIA-6xlib	P63151	P63151	PPP2R2A	Serine/threonine-protein phosphatase 2A 55 kDa regulatory subunit B alpha isoform	P63151	2ABA_HUMAN	Filtered	Filtered	Filtered
libDIA-22xlib	Q01650;Q92536;Q9UM01	Q01650;Q92536;Q9UM01	SLC7A5;SLC7A6;SLC7A7	Large neutral amino acids transporter small subunit 1;Y+L amino acid transporter 2;Y+L amino acid transporter 1	Q01650;Q92536;Q9UM01	LAT1_HUMAN;YLAT2_HUMAN;YLAT1_HUMAN	Filtered	Filtered	Filtered			libDIA-6xlib	P63165	P63165	SUMO1	Small ubiquitin-related modifier 1	P63165	SUMO1_HUMAN	1473.68	1618.51	1170.36
libDIA-22xlib	Q01813	Q01813	PFKP	ATP-dependent 6-phosphofructokinase, platelet type	Q01813	PFKAP_HUMAN	2278.42	3135.73	2307.43			libDIA-6xlib	P63173	P63173	RPL38	60S ribosomal protein L38	P63173	RL38_HUMAN	4639.18	7074.43	4162.52
libDIA-22xlib	Q01844	Q01844	EWSR1	RNA-binding protein EWS	Q01844	EWS_HUMAN	1977.64	2620.52	4664.82			libDIA-6xlib	P63208	P63208	SKP1	S-phase kinase-associated protein 1	P63208	SKP1_HUMAN	4678.25	5854.52	6125.1
libDIA-22xlib	Q02218	Q02218	OGDH	2-oxoglutarate dehydrogenase, mitochondrial	Q02218	ODO1_HUMAN	0.451035	Filtered	Filtered			libDIA-6xlib	P63220	P63220	RPS21	40S ribosomal protein S21	P63220	RS21_HUMAN	2009.82	3798.92	1838.6
libDIA-22xlib	Q02413	Q02413	DSG1	Desmoglein-1	Q02413	DSG1_HUMAN	1017.24	3322.99	3939.56			libDIA-6xlib	P63241	P63241	EIF5A	Eukaryotic translation initiation factor 5A-1	P63241	IF5A1_HUMAN	6441.31	5461.58	16267
libDIA-22xlib	Q02543	Q02543	RPL18A	60S ribosomal protein L18a	Q02543	RL18A_HUMAN	809.987	999.454	825.36			libDIA-6xlib	P63244	P63244	GNB2L1	Guanine nucleotide-binding protein subunit beta-2-like 1	P63244	GBLP_HUMAN	11196.3	11474.1	11021.6
libDIA-22xlib	Q02750	Q02750	MAP2K1	Dual specificity mitogen-activated protein kinase kinase 1	Q02750	MP2K1_HUMAN	Filtered	Filtered	Filtered			libDIA-6xlib	P63279	P63279	UBE2I	SUMO-conjugating enzyme UBC9	P63279	UBC9_HUMAN	291.412	927.957	1799.48
libDIA-22xlib	Q02790	Q02790	FKBP4	Peptidyl-prolyl cis-trans isomerase FKBP4	Q02790	FKBP4_HUMAN	9617	15165.5	14073			libDIA-6xlib	P67809	P67809	YBX1	Nuclease-sensitive element-binding protein 1	P67809	YBOX1_HUMAN	Filtered	Filtered	Filtered
libDIA-22xlib	Q02809	Q02809	PLOD1	Procollagen-lysine,2-oxoglutarate 5-dioxygenase 1	Q02809	PLOD1_HUMAN	Filtered	Filtered	Filtered			libDIA-6xlib	P67812	P67812	SEC11A	Signal peptidase complex catalytic subunit SEC11A	P67812	SC11A_HUMAN	831.905	Filtered	Filtered
libDIA-22xlib	Q02818	Q02818	NUCB1	Nucleobindin-1	Q02818	NUCB1_HUMAN	0.631668	Filtered	119.961			libDIA-6xlib	P67936	P67936	TPM4	Tropomyosin alpha-4 chain	P67936	TPM4_HUMAN	24792.2	32424.1	35807.2
libDIA-22xlib	Q02878	Q02878	RPL6	60S ribosomal protein L6	Q02878	RL6_HUMAN	12845.9	13300.5	15077.4			libDIA-6xlib	P68104;Q5VTE0	P68104;Q5VTE0	EEF1A1;EEF1A1P5	Elongation factor 1-alpha 1;Putative elongation factor 1-alpha-like 3	P68104;Q5VTE0	EF1A1_HUMAN;EF1A3_HUMAN	213392	265397	295123
libDIA-22xlib	Q03135	Q03135	CAV1	Caveolin-1	Q03135	CAV1_HUMAN	5102.86	9332.8	5270.16			libDIA-6xlib	P68363;Q9BQE3	P68363;Q9BQE3	TUBA1B;TUBA1C	Tubulin alpha-1B chain;Tubulin alpha-1C chain	P68363;Q9BQE3	TBA1B_HUMAN;TBA1C_HUMAN	55191.3	55784.7	60186.1
libDIA-22xlib	Q03169	Q03169	TNFAIP2	Tumor necrosis factor alpha-induced protein 2	Q03169	TNAP2_HUMAN	Filtered	Filtered	Filtered			libDIA-6xlib	P68366	P68366	TUBA4A	Tubulin alpha-4A chain	P68366	TBA4A_HUMAN	10257.9	10391.5	18538.5
libDIA-22xlib	Q03252	Q03252	LMNB2	Lamin-B2	Q03252	LMNB2_HUMAN	218.643	Filtered	Filtered			libDIA-6xlib	P68371	P68371	TUBB4B	Tubulin beta-4B chain	P68371	TBB4B_HUMAN	28701.5	36225.2	35472.8
libDIA-22xlib	Q04206	Q04206	RELA	Transcription factor p65	Q04206	TF65_HUMAN	Filtered	Filtered	Filtered			libDIA-6xlib	P68400	P68400	CSNK2A1	Casein kinase II subunit alpha	P68400	CSK21_HUMAN	Filtered	Filtered	Filtered
libDIA-22xlib	Q04323	Q04323	UBXN1	UBX domain-containing protein 1	Q04323	UBXN1_HUMAN	Filtered	Filtered	1118.15			libDIA-6xlib	P68402	P68402	PAFAH1B2	Platelet-activating factor acetylhydrolase IB subunit beta	P68402	PA1B2_HUMAN	Filtered	3294.53	6323.44
libDIA-22xlib	Q04446	Q04446	GBE1	1,4-alpha-glucan-branching enzyme	Q04446	GLGB_HUMAN	Filtered	Filtered	Filtered			libDIA-6xlib	P68431;P84243;Q16695;Q6NXT2;Q71DI3	P68431;P84243;Q16695;Q6NXT2;Q71DI3	HIST1H3A;H3F3A;HIST3H3;H3F3C;HIST2H3A	Histone H3.1;Histone H3.3;Histone H3.1t;Histone H3.3C;Histone H3.2	P68431;P84243;Q16695;Q6NXT2;Q71DI3	H31_HUMAN;H33_HUMAN;H31T_HUMAN;H3C_HUMAN;H32_HUMAN	139003	87867.7	69004.7
libDIA-22xlib	Q04637	Q04637	EIF4G1	Eukaryotic translation initiation factor 4 gamma 1	Q04637	IF4G1_HUMAN	1894.99	3738.6	4050.67			libDIA-6xlib	P69849;Q15155;Q5JPE7	P69849;Q15155;Q5JPE7	NOMO3;NOMO1;NOMO2	Nodal modulator 3;Nodal modulator 1;Nodal modulator 2	P69849;Q15155;Q5JPE7	NOMO3_HUMAN;NOMO1_HUMAN;NOMO2_HUMAN	Filtered	Filtered	Filtered
libDIA-22xlib	Q04695	Q04695	KRT17	Keratin, type I cytoskeletal 17	Q04695	K1C17_HUMAN	Filtered	Filtered	Filtered			libDIA-6xlib	P78344	P78344	EIF4G2	Eukaryotic translation initiation factor 4 gamma 2	P78344	IF4G2_HUMAN	Filtered	Filtered	Filtered
libDIA-22xlib	Q04760	Q04760	GLO1	Lactoylglutathione lyase	Q04760	LGUL_HUMAN	956.558	1587	3887.8			libDIA-6xlib	P78347	P78347	GTF2I	General transcription factor II-I	P78347	GTF2I_HUMAN	677.621	392.092	Filtered
libDIA-22xlib	Q04828	Q04828	AKR1C1	Aldo-keto reductase family 1 member C1	Q04828	AK1C1_HUMAN	79252.6	77751.6	81041.1			libDIA-6xlib	P78362;Q96SB4	P78362;Q96SB4	SRPK2;SRPK1	SRSF protein kinase 2;SRSF protein kinase 1	P78362;Q96SB4	SRPK2_HUMAN;SRPK1_HUMAN	Filtered	Filtered	Filtered
libDIA-22xlib	Q04837	Q04837	SSBP1	Single-stranded DNA-binding protein, mitochondrial	Q04837	SSBP_HUMAN	104.939	Filtered	Filtered			libDIA-6xlib	P78371	P78371	CCT2	T-complex protein 1 subunit beta	P78371	TCPB_HUMAN	2202.2	2643.29	2586.02
libDIA-22xlib	Q04917	Q04917	YWHAH	14-3-3 protein eta	Q04917	1433F_HUMAN	5408.28	5484.26	6398.2			libDIA-6xlib	P78395	P78395	PRAME	Melanoma antigen preferentially expressed in tumors	P78395	PRAME_HUMAN	63840.1	69767.7	61004.4
libDIA-22xlib	Q05639	Q05639	EEF1A2	Elongation factor 1-alpha 2	Q05639	EF1A2_HUMAN	1186.04	Filtered	1807.15			libDIA-6xlib	P78417	P78417	GSTO1	Glutathione S-transferase omega-1	P78417	GSTO1_HUMAN	1975.54	2399.78	1760.3
libDIA-22xlib	Q05682	Q05682	CALD1	Caldesmon	Q05682	CALD1_HUMAN	0.570545	Filtered	Filtered			libDIA-6xlib	P78527	P78527	PRKDC	DNA-dependent protein kinase catalytic subunit	P78527	PRKDC_HUMAN	1374.69	3644.53	4060.53
libDIA-22xlib	Q06210	Q06210	GFPT1	Glutamine--fructose-6-phosphate aminotransferase [isomerizing] 1	Q06210	GFPT1_HUMAN	Filtered	Filtered	Filtered			libDIA-6xlib	P80188	P80188	LCN2	Neutrophil gelatinase-associated lipocalin	P80188	NGAL_HUMAN	324.72	795.741	0.822342
libDIA-22xlib	Q06323	Q06323	PSME1	Proteasome activator complex subunit 1	Q06323	PSME1_HUMAN	1573.7	3220.51	4065.29			libDIA-6xlib	P81605	P81605	DCD	Dermcidin	P81605	DCD_HUMAN	25939.8	23936.4	19598.5
libDIA-22xlib	Q06830	Q06830	PRDX1	Peroxiredoxin-1	Q06830	PRDX1_HUMAN	114333	116013	118963			libDIA-6xlib	P82650	P82650	MRPS22	28S ribosomal protein S22, mitochondrial	P82650	RT22_HUMAN	Filtered	Filtered	Filtered
libDIA-22xlib	Q07020	Q07020	RPL18	60S ribosomal protein L18	Q07020	RL18_HUMAN	13248.9	18177.4	24100.3			libDIA-6xlib	P82979	P82979	SARNP	SAP domain-containing ribonucleoprotein	P82979	SARNP_HUMAN	556.904	313.588	Filtered
libDIA-22xlib	Q07021	Q07021	C1QBP	Complement component 1 Q subcomponent-binding protein, mitochondrial	Q07021	C1QBP_HUMAN	4943.01	4016.37	7243.73			libDIA-6xlib	P83731	P83731	RPL24	60S ribosomal protein L24	P83731	RL24_HUMAN	5889.43	7184.39	5974.69
libDIA-22xlib	Q07065	Q07065	CKAP4	Cytoskeleton-associated protein 4	Q07065	CKAP4_HUMAN	403.582	2332.19	Filtered			libDIA-6xlib	P83881;Q969Q0	P83881;Q969Q0	RPL36A;RPL36AL	60S ribosomal protein L36a;60S ribosomal protein L36a-like	P83881;Q969Q0	RL36A_HUMAN;RL36L_HUMAN	Filtered	Filtered	Filtered
libDIA-22xlib	Q07157	Q07157	TJP1	Tight junction protein ZO-1	Q07157	ZO1_HUMAN	Filtered	Filtered	Filtered			libDIA-6xlib	P84103	P84103	SRSF3	Serine/arginine-rich splicing factor 3	P84103	SRSF3_HUMAN	11076.5	15590.4	17920.3
libDIA-22xlib	Q07666	Q07666	KHDRBS1	KH domain-containing, RNA-binding, signal transduction-associated protein 1	Q07666	KHDR1_HUMAN	Filtered	2790.12	2551.4			libDIA-6xlib	P86790;P86791	P86790;P86791	CCZ1B;CCZ1	Vacuolar fusion protein CCZ1 homolog B;Vacuolar fusion protein CCZ1 homolog	P86790;P86791	CCZ1B_HUMAN;CCZ1_HUMAN	Filtered	Filtered	Filtered
libDIA-22xlib	Q07955	Q07955	SRSF1	Serine/arginine-rich splicing factor 1	Q07955	SRSF1_HUMAN	2772.76	4025.91	3822.21			libDIA-6xlib	P99999	P99999	CYCS	Cytochrome c	P99999	CYC_HUMAN	Filtered	Filtered	Filtered
libDIA-22xlib	Q07960	Q07960	ARHGAP1	Rho GTPase-activating protein 1	Q07960	RHG01_HUMAN	642.924	1296.34	2090.99			libDIA-6xlib	Q00059	Q00059	TFAM	Transcription factor A, mitochondrial	Q00059	TFAM_HUMAN	Filtered	Filtered	Filtered
libDIA-22xlib	Q08188	Q08188	TGM3	Protein-glutamine gamma-glutamyltransferase E	Q08188	TGM3_HUMAN	Filtered	6403.49	2529.85			libDIA-6xlib	Q00325	Q00325	SLC25A3	Phosphate carrier protein, mitochondrial	Q00325	MPCP_HUMAN	3279.92	Filtered	238.64
libDIA-22xlib	Q08209	Q08209	PPP3CA	Serine/threonine-protein phosphatase 2B catalytic subunit alpha isoform	Q08209	PP2BA_HUMAN	714.448	1033.49	0.976776			libDIA-6xlib	Q00341	Q00341	HDLBP	Vigilin	Q00341	VIGLN_HUMAN	Filtered	749.974	962.526
libDIA-22xlib	Q08211	Q08211	DHX9	ATP-dependent RNA helicase A	Q08211	DHX9_HUMAN	0.520706	2190.23	2471.29			libDIA-6xlib	Q00534	Q00534	CDK6	Cyclin-dependent kinase 6	Q00534	CDK6_HUMAN	Filtered	Filtered	Filtered
libDIA-22xlib	Q08380	Q08380	LGALS3BP	Galectin-3-binding protein	Q08380	LG3BP_HUMAN	81.7174	1112.39	1303.23			libDIA-6xlib	Q00610	Q00610	CLTC	Clathrin heavy chain 1	Q00610	CLH1_HUMAN	2649.09	4159.36	5096.2
libDIA-22xlib	Q08554	Q08554	DSC1	Desmocollin-1	Q08554	DSC1_HUMAN	1383.22	6367.83	4899.38			libDIA-6xlib	Q00688	Q00688	FKBP3	Peptidyl-prolyl cis-trans isomerase FKBP3	Q00688	FKBP3_HUMAN	Filtered	Filtered	Filtered
libDIA-22xlib	Q08722	Q08722	CD47	Leukocyte surface antigen CD47	Q08722	CD47_HUMAN	Filtered	Filtered	Filtered			libDIA-6xlib	Q00796	Q00796	SORD	Sorbitol dehydrogenase	Q00796	DHSO_HUMAN	Filtered	Filtered	Filtered
libDIA-22xlib	Q08752	Q08752	PPID	Peptidyl-prolyl cis-trans isomerase D	Q08752	PPID_HUMAN	Filtered	2113.37	Filtered			libDIA-6xlib	Q00839	Q00839	HNRNPU	Heterogeneous nuclear ribonucleoprotein U	Q00839	HNRPU_HUMAN	5112.56	5284.5	5808.66
libDIA-22xlib	Q08945	Q08945	SSRP1	FACT complex subunit SSRP1	Q08945	SSRP1_HUMAN	Filtered	Filtered	1071.35			libDIA-6xlib	Q01082	Q01082	SPTBN1	Spectrin beta chain, non-erythrocytic 1	Q01082	SPTB2_HUMAN	1907.52	2178.6	2928.98
libDIA-22xlib	Q08J23	Q08J23	NSUN2	tRNA (cytosine(34)-C(5))-methyltransferase	Q08J23	NSUN2_HUMAN	1896.32	1988.74	3243.7			libDIA-6xlib	Q01085	Q01085	TIAL1	Nucleolysin TIAR	Q01085	TIAR_HUMAN	Filtered	Filtered	Filtered
libDIA-22xlib	Q09028	Q09028	RBBP4	Histone-binding protein RBBP4	Q09028	RBBP4_HUMAN	1528.66	2616.81	3508.3			libDIA-6xlib	Q01105	Q01105	SET	Protein SET	Q01105	SET_HUMAN	6991.97	12884.4	15834.2
libDIA-22xlib	Q09161	Q09161	NCBP1	Nuclear cap-binding protein subunit 1	Q09161	NCBP1_HUMAN	Filtered	628.446	Filtered			libDIA-6xlib	Q01130;Q9BRL6	Q01130;Q9BRL6	SRSF2;SRSF8	Serine/arginine-rich splicing factor 2;Serine/arginine-rich splicing factor 8	Q01130;Q9BRL6	SRSF2_HUMAN;SRSF8_HUMAN	Filtered	Filtered	Filtered
libDIA-22xlib	Q09666	Q09666	AHNAK	Neuroblast differentiation-associated protein AHNAK	Q09666	AHNK_HUMAN	12510.4	18955.4	12798.4			libDIA-6xlib	Q01469	Q01469	FABP5	Fatty acid-binding protein, epidermal	Q01469	FABP5_HUMAN	7314.3	7496.7	11032.2
libDIA-22xlib	Q10471	Q10471	GALNT2	Polypeptide N-acetylgalactosaminyltransferase 2	Q10471	GALT2_HUMAN	Filtered	Filtered	Filtered			libDIA-6xlib	Q01518	Q01518	CAP1	Adenylyl cyclase-associated protein 1	Q01518	CAP1_HUMAN	8953.77	10714.6	15020.5
libDIA-22xlib	Q10567	Q10567	AP1B1	AP-1 complex subunit beta-1	Q10567	AP1B1_HUMAN	0.859818	1.02865	Filtered			libDIA-6xlib	Q01650	Q01650	SLC7A5	Large neutral amino acids transporter small subunit 1	Q01650	LAT1_HUMAN	Filtered	Filtered	Filtered
libDIA-22xlib	Q10713	Q10713	PMPCA	Mitochondrial-processing peptidase subunit alpha	Q10713	MPPA_HUMAN	Filtered	Filtered	Filtered			libDIA-6xlib	Q01813	Q01813	PFKP	ATP-dependent 6-phosphofructokinase, platelet type	Q01813	PFKAP_HUMAN	2194.91	2632.23	2278.64
libDIA-22xlib	Q12797	Q12797	ASPH	Aspartyl/asparaginyl beta-hydroxylase	Q12797	ASPH_HUMAN	Filtered	Filtered	Filtered			libDIA-6xlib	Q01844	Q01844	EWSR1	RNA-binding protein EWS	Q01844	EWS_HUMAN	1574.73	2430.28	4101.5
libDIA-22xlib	Q12849	Q12849	GRSF1	G-rich sequence factor 1	Q12849	GRSF1_HUMAN	Filtered	Filtered	Filtered			libDIA-6xlib	Q01970	Q01970	PLCB3	1-phosphatidylinositol 4,5-bisphosphate phosphodiesterase beta-3	Q01970	PLCB3_HUMAN	Filtered	Filtered	Filtered
libDIA-22xlib	Q12874	Q12874	SF3A3	Splicing factor 3A subunit 3	Q12874	SF3A3_HUMAN	Filtered	Filtered	Filtered			libDIA-6xlib	Q02040	Q02040	AKAP17A	A-kinase anchor protein 17A	Q02040	AK17A_HUMAN	Filtered	Filtered	Filtered
libDIA-22xlib	Q12888	Q12888	TP53BP1	Tumor suppressor p53-binding protein 1	Q12888	TP53B_HUMAN	Filtered	Filtered	Filtered			libDIA-6xlib	Q02218	Q02218	OGDH	2-oxoglutarate dehydrogenase, mitochondrial	Q02218	ODO1_HUMAN	Filtered	Filtered	Filtered
libDIA-22xlib	Q12904	Q12904	AIMP1	Aminoacyl tRNA synthase complex-interacting multifunctional protein 1	Q12904	AIMP1_HUMAN	531.292	1950.83	1531.75			libDIA-6xlib	Q02413	Q02413	DSG1	Desmoglein-1	Q02413	DSG1_HUMAN	1017.24	2188.88	2668.13
libDIA-22xlib	Q12905	Q12905	ILF2	Interleukin enhancer-binding factor 2	Q12905	ILF2_HUMAN	2015.94	Filtered	1343.53			libDIA-6xlib	Q02543	Q02543	RPL18A	60S ribosomal protein L18a	Q02543	RL18A_HUMAN	Filtered	Filtered	Filtered
libDIA-22xlib	Q12906	Q12906	ILF3	Interleukin enhancer-binding factor 3	Q12906	ILF3_HUMAN	900.521	989.459	1069.89			libDIA-6xlib	Q02750	Q02750	MAP2K1	Dual specificity mitogen-activated protein kinase kinase 1	Q02750	MP2K1_HUMAN	Filtered	450.357	Filtered
libDIA-22xlib	Q12907	Q12907	LMAN2	Vesicular integral-membrane protein VIP36	Q12907	LMAN2_HUMAN	Filtered	1405.04	776.751			libDIA-6xlib	Q02790	Q02790	FKBP4	Peptidyl-prolyl cis-trans isomerase FKBP4	Q02790	FKBP4_HUMAN	8891.01	13757.5	13503.5
libDIA-22xlib	Q12929	Q12929	EPS8	Epidermal growth factor receptor kinase substrate 8	Q12929	EPS8_HUMAN	Filtered	Filtered	Filtered			libDIA-6xlib	Q02809	Q02809	PLOD1	Procollagen-lysine,2-oxoglutarate 5-dioxygenase 1	Q02809	PLOD1_HUMAN	Filtered	Filtered	Filtered
libDIA-22xlib	Q12931	Q12931	TRAP1	Heat shock protein 75 kDa, mitochondrial	Q12931	TRAP1_HUMAN	882.082	845.783	1932.93			libDIA-6xlib	Q02818	Q02818	NUCB1	Nucleobindin-1	Q02818	NUCB1_HUMAN	Filtered	Filtered	Filtered
libDIA-22xlib	Q12965	Q12965	MYO1E	Unconventional myosin-Ie	Q12965	MYO1E_HUMAN	Filtered	Filtered	Filtered			libDIA-6xlib	Q02878	Q02878	RPL6	60S ribosomal protein L6	Q02878	RL6_HUMAN	12149.9	12892.9	14508.6
libDIA-22xlib	Q13011	Q13011	ECH1	Delta(3,5)-Delta(2,4)-dienoyl-CoA isomerase, mitochondrial	Q13011	ECH1_HUMAN	Filtered	Filtered	Filtered			libDIA-6xlib	Q02880	Q02880	TOP2B	DNA topoisomerase 2-beta	Q02880	TOP2B_HUMAN	Filtered	Filtered	Filtered
libDIA-22xlib	Q13045	Q13045	FLII	Protein flightless-1 homolog	Q13045	FLII_HUMAN	Filtered	Filtered	Filtered			libDIA-6xlib	Q03135	Q03135	CAV1	Caveolin-1	Q03135	CAV1_HUMAN	5096.02	9360.66	5270.2
libDIA-22xlib	Q13057	Q13057	COASY	Bifunctional coenzyme A synthase	Q13057	COASY_HUMAN	Filtered	Filtered	Filtered			libDIA-6xlib	Q03169	Q03169	TNFAIP2	Tumor necrosis factor alpha-induced protein 2	Q03169	TNAP2_HUMAN	Filtered	Filtered	Filtered
libDIA-22xlib	Q13098	Q13098	GPS1	COP9 signalosome complex subunit 1	Q13098	CSN1_HUMAN	Filtered	Filtered	Filtered			libDIA-6xlib	Q03181	Q03181	PPARD	Peroxisome proliferator-activated receptor delta	Q03181	PPARD_HUMAN	9430.27	10744.5	8759.29
libDIA-22xlib	Q13144	Q13144	EIF2B5	Translation initiation factor eIF-2B subunit epsilon	Q13144	EI2BE_HUMAN	Filtered	Filtered	Filtered			libDIA-6xlib	Q03252	Q03252	LMNB2	Lamin-B2	Q03252	LMNB2_HUMAN	1338.16	Filtered	Filtered
libDIA-22xlib	Q13148	Q13148	TARDBP	TAR DNA-binding protein 43	Q13148	TADBP_HUMAN	Filtered	822.417	Filtered			libDIA-6xlib	Q04206	Q04206	RELA	Transcription factor p65	Q04206	TF65_HUMAN	Filtered	Filtered	Filtered
libDIA-22xlib	Q13151	Q13151	HNRNPA0	Heterogeneous nuclear ribonucleoprotein A0	Q13151	ROA0_HUMAN	Filtered	Filtered	Filtered			libDIA-6xlib	Q04323	Q04323	UBXN1	UBX domain-containing protein 1	Q04323	UBXN1_HUMAN	Filtered	850.524	1129.69
libDIA-22xlib	Q13162	Q13162	PRDX4	Peroxiredoxin-4	Q13162	PRDX4_HUMAN	Filtered	Filtered	578.452			libDIA-6xlib	Q04446	Q04446	GBE1	1,4-alpha-glucan-branching enzyme	Q04446	GLGB_HUMAN	Filtered	Filtered	Filtered
[truncated: 698 more rows]

## Sheet: PC9_5 cells
libDIA-Protein Groups IDs												libDIA-Protein Groups IDs												dirDIA-Protein Groups IDs
[truncated: 1,673 more rows]

## Sheet: PC9_14 cells
libDIA-Protein Groups IDs												dirDIA-Protein Groups IDs
[truncated: 2,048 more rows]

[truncated: 2 more sheets: PC9_55 cells, PC9_106 cells]
